# Supplementary material
Source: publisher figshare collection journal article supplement (https://acs.figshare.com/ndownloader/files/7030829)
Supplement: Supplementary file 1 [file 7030829]

 
data_g525
 
_audit_creation_method            'SHELXL-2014/7'
_chemical_name_systematic         ?
_chemical_name_common             ?
_chemical_melting_point           ?
_chemical_formula_moiety   'C21 H20 N' 
_chemical_formula_sum
 'C21 H20 N' 
_chemical_formula_weight          286.38

loop_
 _atom_type_symbol
 _atom_type_description
 _atom_type_scat_dispersion_real
 _atom_type_scat_dispersion_imag
 _atom_type_scat_source
 'C'  'C'   0.0181   0.0091
 'International Tables Vol C Tables 4.2.6.8 and 6.1.1.4'
 'H'  'H'   0.0000   0.0000
 'International Tables Vol C Tables 4.2.6.8 and 6.1.1.4'
 'N'  'N'   0.0311   0.0180
 'International Tables Vol C Tables 4.2.6.8 and 6.1.1.4'
 
_space_group_crystal_system       orthorhombic
_space_group_IT_number            19
_space_group_name_H-M_alt         'P 21 21 21'
_space_group_name_Hall            'P 2ac 2ab'
 
_shelx_space_group_comment
;
The symmetry employed for this shelxl refinement is uniquely defined
by the following loop, which should always be used as a source of
symmetry information in preference to the above space-group names.
They are only intended as comments.
;
 
loop_
 _space_group_symop_operation_xyz
 'x, y, z'
 '-x+1/2, -y, z+1/2'
 '-x, y+1/2, -z+1/2'
 'x+1/2, -y+1/2, -z'
 
_cell_length_a                    6.8167(3)
_cell_length_b                    14.7936(6)
_cell_length_c                    15.5874(6)
_cell_angle_alpha                 90
_cell_angle_beta                  90
_cell_angle_gamma                 90
_cell_volume                      1571.89(11)
_cell_formula_units_Z             4
_cell_measurement_temperature     100(2)
_cell_measurement_reflns_used     3529
_cell_measurement_theta_min       4.120
_cell_measurement_theta_max       79.008
 
_exptl_crystal_description        'rod'
_exptl_crystal_colour             'colorless'
_exptl_crystal_density_meas       ?
_exptl_crystal_density_method     ?
_exptl_crystal_density_diffrn     1.210          
_exptl_crystal_F_000              612
_exptl_transmission_factor_min    ?
_exptl_transmission_factor_max    ?
_exptl_crystal_size_max           0.866
_exptl_crystal_size_mid           0.182
_exptl_crystal_size_min           0.160
_exptl_absorpt_coefficient_mu     0.528
_shelx_estimated_absorpt_T_min    0.658
_shelx_estimated_absorpt_T_max    0.920
_exptl_absorpt_correction_type    'multi-scan'
_exptl_absorpt_correction_T_min    0.658
_exptl_absorpt_correction_T_max    0.920
_exptl_absorpt_process_details    'Sadabs'
_diffrn_ambient_temperature       100(2)
_diffrn_radiation_wavelength      1.54178
_diffrn_radiation_type            CuK\a
_diffrn_source                    ?
_diffrn_measurement_device_type   'Bruker AXS D8 Venture '
_diffrn_measurement_method        'profile data from \q/2\q scans'
_diffrn_detector_area_resol_mean  ?
_diffrn_reflns_number             19472
_diffrn_reflns_av_unetI/netI      0.0388
_diffrn_reflns_av_R_equivalents   0.0555
_diffrn_reflns_limit_h_min        -8
_diffrn_reflns_limit_h_max        8
_diffrn_reflns_limit_k_min        -16
_diffrn_reflns_limit_k_max        18
_diffrn_reflns_limit_l_min        -19
_diffrn_reflns_limit_l_max        19
_diffrn_reflns_theta_min          4.120
_diffrn_reflns_theta_max          79.008
_diffrn_reflns_theta_full         67.679
_diffrn_measured_fraction_theta_max   0.998
_diffrn_measured_fraction_theta_full  0.998
_diffrn_reflns_Laue_measured_fraction_max    0.998
_diffrn_reflns_Laue_measured_fraction_full   0.998
_diffrn_reflns_point_group_measured_fraction_max   0.995
_diffrn_reflns_point_group_measured_fraction_full  0.999
_reflns_number_total              3390
_reflns_number_gt                 3358
_reflns_threshold_expression      'I > 2\s(I)'
_reflns_Friedel_coverage          0.723
_reflns_Friedel_fraction_max      0.990
_reflns_Friedel_fraction_full     0.999
 
_reflns_special_details
;
 Reflections were merged by SHELXL according to the crystal
 class for the calculation of statistics and refinement.
 
 _reflns_Friedel_fraction is defined as the number of unique
 Friedel pairs measured divided by the number that would be
 possible theoretically, ignoring centric projections and
 systematic absences.
;
 
_computing_data_collection 'APEX3 v2016.6.0'
_computing_cell_refinement 'SHELXTL, Acta Cryst., Sect. A 2008, 64, 112-122.'
_computing_data_reduction  'Saint, APEX v2014.11.0.'
_computing_structure_solution 'SHELXT, Acta Cryst., Sect. A 2015, A71, 3-8.'
_computing_structure_refinement 'SHELXL-2014/6 (Sheldrick, 2014)'
_computing_molecular_graphics  'Ortep3'
_computing_publication_material 'APEX3 v2016.6.0'
_refine_special_details           ?
_refine_ls_structure_factor_coef  Fsqd
_refine_ls_matrix_type            full
_refine_ls_weighting_scheme       calc
_refine_ls_weighting_details
'w=1/[\s^2^(Fo^2^)+(0.0949P)^2^+0.1178P] where P=(Fo^2^+2Fc^2^)/3'
_atom_sites_solution_primary      ?
_atom_sites_solution_secondary    ?
_atom_sites_solution_hydrogens    geom
_refine_ls_hydrogen_treatment     constr
_refine_ls_extinction_method      none
_refine_ls_extinction_coef        .
_refine_ls_abs_structure_details
;
 Flack x determined using 1409 quotients [(I+)-(I-)]/[(I+)+(I-)]
 (Parsons, Flack and Wagner, Acta Cryst. B69 (2013) 249-259).
;
_refine_ls_abs_structure_Flack    0.03(17)
_chemical_absolute_configuration  ad
_refine_ls_number_reflns          3390
_refine_ls_number_parameters      201
_refine_ls_number_restraints      0
_refine_ls_R_factor_all           0.0534
_refine_ls_R_factor_gt            0.0530
_refine_ls_wR_factor_ref          0.1309
_refine_ls_wR_factor_gt           0.1302
_refine_ls_goodness_of_fit_ref    1.180
_refine_ls_restrained_S_all       1.180
_refine_ls_shift/su_max           0.000
_refine_ls_shift/su_mean          0.000
 
loop_
 _atom_site_label
 _atom_site_type_symbol
 _atom_site_fract_x
 _atom_site_fract_y
 _atom_site_fract_z
 _atom_site_U_iso_or_equiv
 _atom_site_adp_type
 _atom_site_occupancy
 _atom_site_site_symmetry_order  
 _atom_site_calc_flag
 _atom_site_refinement_flags_posn
 _atom_site_refinement_flags_adp
 _atom_site_refinement_flags_occupancy
 _atom_site_disorder_assembly
 _atom_site_disorder_group
N1 N 0.9177(2) 0.59034(12) 0.57001(11) 0.0214(4) Uani 1 1 d . . . . .
C1 C 0.7568(3) 0.56917(11) 0.57580(11) 0.0154(4) Uani 1 1 d . . . . .
C10 C 0.4182(3) 0.31297(12) 0.41603(11) 0.0176(4) Uani 1 1 d . . . . .
C2 C 0.5463(2) 0.54434(11) 0.58132(11) 0.0135(4) Uani 1 1 d . . . . .
C5 C 0.6067(3) 0.35349(12) 0.41330(11) 0.0168(4) Uani 1 1 d . . . . .
C12 C 0.3175(3) 0.42239(12) 0.52375(11) 0.0164(4) Uani 1 1 d . . . . .
H12 H 0.2192 0.4462 0.5606 0.020 Uiso 1 1 calc R U . . .
C3 C 0.5069(3) 0.46283(11) 0.52187(11) 0.0138(3) Uani 1 1 d . . . . .
C19 C 0.4271(2) 0.62934(11) 0.55222(11) 0.0151(4) Uani 1 1 d . . . . .
H19 H 0.2845 0.6138 0.5541 0.018 Uiso 1 1 calc R U . . .
C11 C 0.2757(3) 0.34941(12) 0.47279(12) 0.0179(4) Uani 1 1 d . . . . .
H11 H 0.1491 0.3227 0.4755 0.021 Uiso 1 1 calc R U . . .
C6 C 0.7504(3) 0.31827(13) 0.35639(12) 0.0207(4) Uani 1 1 d . . . . .
H6 H 0.8766 0.3454 0.3538 0.025 Uiso 1 1 calc R U . . .
C9 C 0.3782(3) 0.23806(13) 0.36183(13) 0.0224(4) Uani 1 1 d . . . . .
H9 H 0.2525 0.2103 0.3630 0.027 Uiso 1 1 calc R U . . .
C7 C 0.7085(3) 0.24558(14) 0.30528(13) 0.0249(4) Uani 1 1 d . . . . .
H7 H 0.8061 0.2219 0.2680 0.030 Uiso 1 1 calc R U . . .
C4 C 0.6472(3) 0.42834(11) 0.46796(11) 0.0156(4) Uani 1 1 d . . . . .
H4 H 0.7741 0.4549 0.4671 0.019 Uiso 1 1 calc R U . . .
C21 C 0.4619(3) 0.70982(12) 0.61237(13) 0.0211(4) Uani 1 1 d . . . . .
H21A H 0.6032 0.7207 0.6179 0.032 Uiso 1 1 calc R U . . .
H21B H 0.4064 0.6964 0.6690 0.032 Uiso 1 1 calc R U . . .
H21C H 0.3984 0.7638 0.5887 0.032 Uiso 1 1 calc R U . . .
C8 C 0.5203(3) 0.20566(13) 0.30780(13) 0.0263(5) Uani 1 1 d . . . . .
H8 H 0.4918 0.1557 0.2716 0.032 Uiso 1 1 calc R U . . .
C18 C 0.6463(3) 0.47138(12) 0.72204(11) 0.0181(4) Uani 1 1 d . . . . .
H18 H 0.7722 0.4618 0.6975 0.022 Uiso 1 1 calc R U . . .
C17 C 0.6078(3) 0.44077(13) 0.80482(12) 0.0214(4) Uani 1 1 d . . . . .
H17 H 0.7067 0.4097 0.8361 0.026 Uiso 1 1 calc R U . . .
C13 C 0.5023(3) 0.51585(11) 0.67475(10) 0.0139(4) Uani 1 1 d . . . . .
C16 C 0.4261(3) 0.45541(13) 0.84167(12) 0.0217(4) Uani 1 1 d . . . . .
H16 H 0.4003 0.4349 0.8983 0.026 Uiso 1 1 calc R U . . .
C14 C 0.3186(3) 0.52999(12) 0.71190(12) 0.0183(4) Uani 1 1 d . . . . .
H14 H 0.2186 0.5599 0.6804 0.022 Uiso 1 1 calc R U . . .
C20 C 0.4789(3) 0.65637(13) 0.46008(12) 0.0194(4) Uani 1 1 d . . . . .
H20A H 0.3944 0.7064 0.4419 0.029 Uiso 1 1 calc R U . . .
H20B H 0.4590 0.6046 0.4219 0.029 Uiso 1 1 calc R U . . .
H20C H 0.6164 0.6755 0.4575 0.029 Uiso 1 1 calc R U . . .
C15 C 0.2815(3) 0.50018(13) 0.79559(12) 0.0201(4) Uani 1 1 d . . . . .
H15 H 0.1568 0.5106 0.8209 0.024 Uiso 1 1 calc R U . . .
 
loop_
 _atom_site_aniso_label
 _atom_site_aniso_U_11
 _atom_site_aniso_U_22
 _atom_site_aniso_U_33
 _atom_site_aniso_U_23
 _atom_site_aniso_U_13
 _atom_site_aniso_U_12
N1 0.0083(7) 0.0236(7) 0.0325(8) -0.0006(6) -0.0004(6) -0.0009(6)
C1 0.0093(8) 0.0140(8) 0.0229(8) -0.0019(6) -0.0021(6) 0.0029(6)
C10 0.0154(8) 0.0149(8) 0.0226(8) 0.0017(6) -0.0015(7) -0.0009(7)
C2 0.0050(7) 0.0144(8) 0.0212(7) -0.0002(6) 0.0004(6) 0.0006(6)
C5 0.0141(8) 0.0142(8) 0.0221(8) 0.0020(6) 0.0005(6) 0.0004(6)
C12 0.0088(8) 0.0180(8) 0.0225(8) 0.0008(6) 0.0008(6) 0.0002(6)
C3 0.0086(8) 0.0133(7) 0.0195(7) 0.0015(6) -0.0011(6) 0.0002(6)
C19 0.0057(7) 0.0145(8) 0.0251(8) 0.0013(6) -0.0013(6) 0.0006(6)
C11 0.0097(8) 0.0181(8) 0.0260(9) 0.0028(7) -0.0001(7) -0.0029(6)
C6 0.0166(9) 0.0193(9) 0.0262(9) -0.0007(6) 0.0048(7) -0.0020(7)
C9 0.0194(9) 0.0183(8) 0.0295(9) -0.0019(7) 0.0010(8) -0.0066(7)
C7 0.0259(10) 0.0215(9) 0.0274(9) -0.0041(7) 0.0086(8) -0.0026(8)
C4 0.0074(8) 0.0155(8) 0.0240(8) 0.0011(6) 0.0011(6) -0.0017(6)
C21 0.0141(9) 0.0159(9) 0.0333(9) -0.0027(7) -0.0020(7) 0.0024(7)
C8 0.0308(11) 0.0190(9) 0.0290(9) -0.0056(7) 0.0039(8) -0.0080(9)
C18 0.0113(8) 0.0170(8) 0.0259(9) -0.0007(6) -0.0004(7) 0.0014(7)
C17 0.0187(9) 0.0193(9) 0.0261(9) 0.0032(7) -0.0054(7) 0.0010(8)
C13 0.0092(8) 0.0116(7) 0.0209(8) -0.0019(6) -0.0010(6) -0.0011(6)
C16 0.0239(9) 0.0196(8) 0.0216(8) 0.0000(6) -0.0005(7) -0.0036(8)
C14 0.0123(8) 0.0193(9) 0.0234(8) -0.0004(6) -0.0011(6) 0.0010(7)
C20 0.0128(8) 0.0183(8) 0.0271(9) 0.0045(7) -0.0023(7) -0.0008(7)
C15 0.0155(8) 0.0204(8) 0.0243(8) -0.0025(7) 0.0040(7) -0.0020(7)
 
_geom_special_details
;
 All esds (except the esd in the dihedral angle between two l.s. planes)
 are estimated using the full covariance matrix.  The cell esds are taken
 into account individually in the estimation of esds in distances, angles
 and torsion angles; correlations between esds in cell parameters are only
 used when they are defined by crystal symmetry.  An approximate (isotropic)
 treatment of cell esds is used for estimating esds involving l.s. planes.
;
 
loop_
 _geom_bond_atom_site_label_1
 _geom_bond_atom_site_label_2
 _geom_bond_distance
 _geom_bond_site_symmetry_2
 _geom_bond_publ_flag
N1 C1 1.144(3) . ?
C1 C2 1.483(2) . ?
C10 C5 1.419(3) . ?
C10 C9 1.420(3) . ?
C10 C11 1.420(3) . ?
C2 C3 1.544(2) . ?
C2 C13 1.546(2) . ?
C2 C19 1.564(2) . ?
C5 C6 1.421(3) . ?
C5 C4 1.424(2) . ?
C12 C11 1.370(3) . ?
C12 C3 1.424(2) . ?
C12 H12 0.9500 . ?
C3 C4 1.372(2) . ?
C19 C20 1.532(2) . ?
C19 C21 1.534(2) . ?
C19 H19 1.0000 . ?
C11 H11 0.9500 . ?
C6 C7 1.368(3) . ?
C6 H6 0.9500 . ?
C9 C8 1.370(3) . ?
C9 H9 0.9500 . ?
C7 C8 1.413(3) . ?
C7 H7 0.9500 . ?
C4 H4 0.9500 . ?
C21 H21A 0.9800 . ?
C21 H21B 0.9800 . ?
C21 H21C 0.9800 . ?
C8 H8 0.9500 . ?
C18 C17 1.392(3) . ?
C18 C13 1.393(2) . ?
C18 H18 0.9500 . ?
C17 C16 1.383(3) . ?
C17 H17 0.9500 . ?
C13 C14 1.395(2) . ?
C16 C15 1.388(3) . ?
C16 H16 0.9500 . ?
C14 C15 1.400(3) . ?
C14 H14 0.9500 . ?
C20 H20A 0.9800 . ?
C20 H20B 0.9800 . ?
C20 H20C 0.9800 . ?
C15 H15 0.9500 . ?
 
loop_
 _geom_angle_atom_site_label_1
 _geom_angle_atom_site_label_2
 _geom_angle_atom_site_label_3
 _geom_angle
 _geom_angle_site_symmetry_1
 _geom_angle_site_symmetry_3
 _geom_angle_publ_flag
N1 C1 C2 178.03(19) . . ?
C5 C10 C9 119.06(17) . . ?
C5 C10 C11 118.54(16) . . ?
C9 C10 C11 122.40(17) . . ?
C1 C2 C3 109.08(14) . . ?
C1 C2 C13 108.07(13) . . ?
C3 C2 C13 108.58(13) . . ?
C1 C2 C19 106.64(13) . . ?
C3 C2 C19 111.30(13) . . ?
C13 C2 C19 113.05(14) . . ?
C10 C5 C6 119.24(16) . . ?
C10 C5 C4 119.10(16) . . ?
C6 C5 C4 121.65(17) . . ?
C11 C12 C3 120.50(16) . . ?
C11 C12 H12 119.7 . . ?
C3 C12 H12 119.7 . . ?
C4 C3 C12 119.27(16) . . ?
C4 C3 C2 122.46(15) . . ?
C12 C3 C2 118.27(15) . . ?
C20 C19 C21 109.56(15) . . ?
C20 C19 C2 111.23(14) . . ?
C21 C19 C2 111.50(14) . . ?
C20 C19 H19 108.1 . . ?
C21 C19 H19 108.1 . . ?
C2 C19 H19 108.1 . . ?
C12 C11 C10 121.22(17) . . ?
C12 C11 H11 119.4 . . ?
C10 C11 H11 119.4 . . ?
C7 C6 C5 120.50(18) . . ?
C7 C6 H6 119.7 . . ?
C5 C6 H6 119.7 . . ?
C8 C9 C10 120.22(19) . . ?
C8 C9 H9 119.9 . . ?
C10 C9 H9 119.9 . . ?
C6 C7 C8 120.12(18) . . ?
C6 C7 H7 119.9 . . ?
C8 C7 H7 119.9 . . ?
C3 C4 C5 121.36(16) . . ?
C3 C4 H4 119.3 . . ?
C5 C4 H4 119.3 . . ?
C19 C21 H21A 109.5 . . ?
C19 C21 H21B 109.5 . . ?
H21A C21 H21B 109.5 . . ?
C19 C21 H21C 109.5 . . ?
H21A C21 H21C 109.5 . . ?
H21B C21 H21C 109.5 . . ?
C9 C8 C7 120.84(17) . . ?
C9 C8 H8 119.6 . . ?
C7 C8 H8 119.6 . . ?
C17 C18 C13 120.76(17) . . ?
C17 C18 H18 119.6 . . ?
C13 C18 H18 119.6 . . ?
C16 C17 C18 120.18(17) . . ?
C16 C17 H17 119.9 . . ?
C18 C17 H17 119.9 . . ?
C18 C13 C14 118.92(16) . . ?
C18 C13 C2 119.38(15) . . ?
C14 C13 C2 121.64(15) . . ?
C17 C16 C15 119.75(17) . . ?
C17 C16 H16 120.1 . . ?
C15 C16 H16 120.1 . . ?
C13 C14 C15 120.12(17) . . ?
C13 C14 H14 119.9 . . ?
C15 C14 H14 119.9 . . ?
C19 C20 H20A 109.5 . . ?
C19 C20 H20B 109.5 . . ?
H20A C20 H20B 109.5 . . ?
C19 C20 H20C 109.5 . . ?
H20A C20 H20C 109.5 . . ?
H20B C20 H20C 109.5 . . ?
C16 C15 C14 120.26(17) . . ?
C16 C15 H15 119.9 . . ?
C14 C15 H15 119.9 . . ?
 
loop_
 _geom_torsion_atom_site_label_1
 _geom_torsion_atom_site_label_2
 _geom_torsion_atom_site_label_3
 _geom_torsion_atom_site_label_4
 _geom_torsion
 _geom_torsion_site_symmetry_1
 _geom_torsion_site_symmetry_2
 _geom_torsion_site_symmetry_3
 _geom_torsion_site_symmetry_4
 _geom_torsion_publ_flag
C9 C10 C5 C6 0.1(3) . . . . ?
C11 C10 C5 C6 -179.53(16) . . . . ?
C9 C10 C5 C4 -179.68(17) . . . . ?
C11 C10 C5 C4 0.7(2) . . . . ?
C11 C12 C3 C4 0.5(3) . . . . ?
C11 C12 C3 C2 -179.42(15) . . . . ?
C1 C2 C3 C4 -5.9(2) . . . . ?
C13 C2 C3 C4 -123.41(17) . . . . ?
C19 C2 C3 C4 111.53(18) . . . . ?
C1 C2 C3 C12 174.01(15) . . . . ?
C13 C2 C3 C12 56.46(19) . . . . ?
C19 C2 C3 C12 -68.60(18) . . . . ?
C1 C2 C19 C20 60.08(18) . . . . ?
C3 C2 C19 C20 -58.78(17) . . . . ?
C13 C2 C19 C20 178.70(13) . . . . ?
C1 C2 C19 C21 -62.53(18) . . . . ?
C3 C2 C19 C21 178.61(14) . . . . ?
C13 C2 C19 C21 56.09(18) . . . . ?
C3 C12 C11 C10 -0.9(3) . . . . ?
C5 C10 C11 C12 0.3(3) . . . . ?
C9 C10 C11 C12 -179.28(17) . . . . ?
C10 C5 C6 C7 -0.6(3) . . . . ?
C4 C5 C6 C7 179.19(18) . . . . ?
C5 C10 C9 C8 0.0(3) . . . . ?
C11 C10 C9 C8 179.63(18) . . . . ?
C5 C6 C7 C8 0.9(3) . . . . ?
C12 C3 C4 C5 0.6(3) . . . . ?
C2 C3 C4 C5 -179.54(15) . . . . ?
C10 C5 C4 C3 -1.2(3) . . . . ?
C6 C5 C4 C3 179.07(16) . . . . ?
C10 C9 C8 C7 0.3(3) . . . . ?
C6 C7 C8 C9 -0.8(3) . . . . ?
C13 C18 C17 C16 -0.9(3) . . . . ?
C17 C18 C13 C14 0.5(3) . . . . ?
C17 C18 C13 C2 -176.72(15) . . . . ?
C1 C2 C13 C18 -34.1(2) . . . . ?
C3 C2 C13 C18 84.10(18) . . . . ?
C19 C2 C13 C18 -151.87(15) . . . . ?
C1 C2 C13 C14 148.77(16) . . . . ?
C3 C2 C13 C14 -93.04(19) . . . . ?
C19 C2 C13 C14 31.0(2) . . . . ?
C18 C17 C16 C15 0.5(3) . . . . ?
C18 C13 C14 C15 0.4(3) . . . . ?
C2 C13 C14 C15 177.53(16) . . . . ?
C17 C16 C15 C14 0.4(3) . . . . ?
C13 C14 C15 C16 -0.8(3) . . . . ?
 
_refine_diff_density_max    0.696
_refine_diff_density_min   -0.434
_refine_diff_density_rms    0.153

_shelx_res_file
;

    g525.res created by SHELXL-2014/7


TITL shelxt_a.res in P2(1)2(1)2(1)
CELL  1.54178   6.8167  14.7936  15.5874   90.000   90.000   90.000
ZERR     4.00   0.0003   0.0006   0.0006    0.000    0.000    0.000
LATT -1
SYMM  1/2 - X, - Y, 1/2 + Z
SYMM  - X, 1/2 + Y, 1/2 - Z
SYMM  1/2 + X, 1/2 - Y, - Z
SFAC C  H  N
UNIT 84  80  4

MERG 2

L.S. 9000

ACTA

BOND   $H

FMAP 2

PLAN 5

SIZE     0.160   0.182   0.866

HTAB

CONF

TEMP  -173.15

WGHT    0.094900    0.117800
FVAR       0.17503
N1    3    0.917729    0.590341    0.570014    11.00000    0.00826    0.02356 =
         0.03250   -0.00062   -0.00035   -0.00091
C1    1    0.756804    0.569172    0.575804    11.00000    0.00934    0.01400 =
         0.02289   -0.00189   -0.00206    0.00294
C10   1    0.418186    0.312969    0.416034    11.00000    0.01539    0.01485 =
         0.02261    0.00165   -0.00145   -0.00089
C2    1    0.546344    0.544338    0.581324    11.00000    0.00502    0.01438 =
         0.02121   -0.00020    0.00042    0.00056
C5    1    0.606683    0.353493    0.413298    11.00000    0.01409    0.01425 =
         0.02207    0.00199    0.00050    0.00039
C12   1    0.317468    0.422385    0.523751    11.00000    0.00876    0.01796 =
         0.02245    0.00081    0.00083    0.00019
AFIX  43
H12   2    0.219238    0.446175    0.560621    11.00000   -1.20000
AFIX   0
C3    1    0.506929    0.462826    0.521872    11.00000    0.00864    0.01325 =
         0.01951    0.00152   -0.00107    0.00015
C19   1    0.427150    0.629336    0.552220    11.00000    0.00571    0.01453 =
         0.02506    0.00128   -0.00134    0.00058
AFIX  13
H19   2    0.284466    0.613754    0.554089    11.00000   -1.20000
AFIX   0
C11   1    0.275717    0.349414    0.472790    11.00000    0.00966    0.01806 =
         0.02601    0.00278   -0.00011   -0.00289
AFIX  43
H11   2    0.149125    0.322709    0.475475    11.00000   -1.20000
AFIX   0
C6    1    0.750444    0.318269    0.356393    11.00000    0.01655    0.01927 =
         0.02621   -0.00073    0.00480   -0.00203
AFIX  43
H6    2    0.876635    0.345386    0.353804    11.00000   -1.20000
AFIX   0
C9    1    0.378212    0.238063    0.361826    11.00000    0.01943    0.01829 =
         0.02950   -0.00193    0.00095   -0.00662
AFIX  43
H9    2    0.252545    0.210329    0.363029    11.00000   -1.20000
AFIX   0
C7    1    0.708518    0.245577    0.305284    11.00000    0.02589    0.02152 =
         0.02742   -0.00412    0.00862   -0.00262
AFIX  43
H7    2    0.806148    0.221906    0.268043    11.00000   -1.20000
AFIX   0
C4    1    0.647234    0.428342    0.467962    11.00000    0.00740    0.01547 =
         0.02398    0.00113    0.00112   -0.00168
AFIX  43
H4    2    0.774076    0.454928    0.467064    11.00000   -1.20000
AFIX   0
C21   1    0.461923    0.709823    0.612367    11.00000    0.01407    0.01585 =
         0.03333   -0.00271   -0.00199    0.00238
AFIX 137
H21A  2    0.603163    0.720722    0.617901    11.00000   -1.50000
H21B  2    0.406425    0.696416    0.668952    11.00000   -1.50000
H21C  2    0.398398    0.763752    0.588675    11.00000   -1.50000
AFIX   0
C8    1    0.520257    0.205657    0.307799    11.00000    0.03082    0.01900 =
         0.02895   -0.00559    0.00387   -0.00805
AFIX  43
H8    2    0.491849    0.155711    0.271561    11.00000   -1.20000
AFIX   0
C18   1    0.646278    0.471384    0.722039    11.00000    0.01132    0.01698 =
         0.02591   -0.00074   -0.00044    0.00144
AFIX  43
H18   2    0.772186    0.461830    0.697535    11.00000   -1.20000
AFIX   0
C17   1    0.607831    0.440773    0.804820    11.00000    0.01873    0.01926 =
         0.02613    0.00325   -0.00537    0.00098
AFIX  43
H17   2    0.706746    0.409748    0.836066    11.00000   -1.20000
AFIX   0
C13   1    0.502276    0.515845    0.674751    11.00000    0.00922    0.01164 =
         0.02091   -0.00195   -0.00098   -0.00111
C16   1    0.426079    0.455406    0.841671    11.00000    0.02393    0.01958 =
         0.02157    0.00004   -0.00046   -0.00364
AFIX  43
H16   2    0.400288    0.434894    0.898312    11.00000   -1.20000
AFIX   0
C14   1    0.318606    0.529986    0.711902    11.00000    0.01230    0.01926 =
         0.02339   -0.00041   -0.00110    0.00096
AFIX  43
H14   2    0.218574    0.559893    0.680357    11.00000   -1.20000
AFIX   0
C20   1    0.478901    0.656373    0.460081    11.00000    0.01284    0.01835 =
         0.02713    0.00448   -0.00231   -0.00083
AFIX 137
H20A  2    0.394360    0.706399    0.441867    11.00000   -1.50000
H20B  2    0.458999    0.604554    0.421892    11.00000   -1.50000
H20C  2    0.616446    0.675461    0.457545    11.00000   -1.50000
AFIX   0
C15   1    0.281456    0.500178    0.795592    11.00000    0.01554    0.02041 =
         0.02429   -0.00248    0.00399   -0.00204
AFIX  43
H15   2    0.156767    0.510639    0.820939    11.00000   -1.20000
AFIX   0
HKLF    4

REM  shelxt_a.res in P2(1)2(1)2(1)
REM R1 =  0.0530 for    3358 Fo > 4sig(Fo)  and  0.0534 for all    3390 data
REM    201 parameters refined using      0 restraints

END

WGHT      0.0949      0.1178

REM No hydrogen bonds found for HTAB generation

REM Highest difference peak  0.696,  deepest hole -0.434,  1-sigma level  0.153
Q1    1   0.6522  0.5726  0.5704  11.00000  0.05    0.70
Q2    1   0.5131  0.3290  0.4190  11.00000  0.05    0.64
Q3    1   0.4810  0.5800  0.5684  11.00000  0.05    0.59
Q4    1   0.8045  0.5981  0.5668  11.00000  0.05    0.58
Q5    1   1.0331  0.5950  0.5708  11.00000  0.05    0.57
;
_shelx_res_checksum   81118

_shelx_hkl_file
;
  -1   0   0   -0.05    0.09
   1   0   0   -0.05    0.08
  -2   0   0   10.27    0.97
   2   0   0   12.70    0.78
   2   0   0   11.35    0.79
   2   0   0   11.75    1.02
  -2   0   0   12.43    0.78
  -2   0   0   10.95    0.79
  -3   0   0    0.01    0.01
   3   0   0    0.02    0.03
   3   0   0   -0.15    0.56
  -3   0   0    0.11    0.49
   3   0   0    0.01    0.01
  -4   0   0    8.30    0.68
   4   0   0    8.89    0.62
   4   0   0    9.78    0.63
   4   0   0    9.65    0.66
  -4   0   0    9.49    0.62
  -4   0   0    8.74    0.65
  -5   0   0   -0.01    0.08
  -5   0   0    0.00    0.02
   5   0   0    0.02    0.02
   5   0   0    0.00    0.04
   5   0   0    0.01    0.03
   5   0   0    0.00    0.02
   6   0   0    4.03    0.27
   6   0   0    3.47    0.26
   6   0   0    3.97    0.26
  -6   0   0    3.15    0.34
  -6   0   0    3.72    0.25
  -7   0   0    0.01    0.09
   8   0   0    2.79    0.19
   8   0   0    2.60    0.19
   0  -1   0    0.02    0.02
   0   1   0    0.03    0.02
  -1   1   0    0.14    0.11
  -1   1   0    0.12    0.01
  -1   1   0    0.09    0.02
   1  -1   0    0.01    0.10
   1   1   0    0.13    0.02
   1   1   0    0.10    0.09
   1  -1   0    0.10    0.02
  -1  -1   0    0.00    0.08
   1  -1   0    0.13    0.01
  -2  -1   0   19.02    1.40
  -2  -1   0   18.14    1.56
   2  -1   0   20.70    1.40
   2  -1   0   22.93    1.65
  -2   1   0   19.63    1.40
  -2   1   0   18.19    1.57
   2  -1   0   22.69    1.39
  -2   1   0   21.81    1.39
  -2  -1   0   22.31    1.39
   2   1   0   22.88    1.60
   2   1   0   20.30    1.40
   3  -1   0   19.11    1.17
  -3   1   0   15.56    1.60
  -3  -1   0   16.27    1.18
  -3  -1   0   18.71    1.17
   3   1   0   17.54    1.65
  -3   1   0   16.87    1.19
   3  -1   0   17.76    1.20
  -3  -1   0   15.37    1.57
  -3   1   0   18.62    1.17
   3  -1   0   17.11    1.72
   3   1   0   17.44    1.19
  -4   1   0    6.25    0.53
   4   1   0    6.50    0.47
  -4   1   0    6.71    0.50
  -4  -1   0    6.94    0.47
   4  -1   0    7.30    0.48
   4   1   0    7.78    0.47
  -4   1   0    7.22    0.47
   4  -1   0    6.48    0.47
  -4  -1   0    6.70    0.50
   4   1   0    7.21    0.48
   4  -1   0    7.04    0.51
   5  -1   0    1.67    0.12
  -5  -1   0    1.49    0.11
  -5   1   0    1.35    0.20
   5   1   0    1.50    0.13
   5   1   0    1.37    0.12
  -5  -1   0    1.31    0.20
   5  -1   0    1.38    0.11
  -5   1   0    1.37    0.11
   5   1   0    1.76    0.11
   5   1   0    1.70    0.12
   5  -1   0    1.43    0.14
  -6  -1   0    2.57    0.30
   6   1   0    3.24    0.22
   6  -1   0    3.39    0.22
   6   1   0    2.96    0.21
  -6   1   0    3.19    0.21
   6  -1   0    2.94    0.21
  -6  -1   0    3.08    0.21
   6  -1   0    3.09    0.22
  -6   1   0    2.60    0.29
   7  -1   0   10.91    0.73
   7  -1   0    9.91    0.71
   7   1   0   11.56    0.73
  -7   1   0   10.85    0.70
  -7   1   0    8.93    0.77
   8  -1   0    2.49    0.18
   8   1   0    2.74    0.18
   8  -1   0    2.42    0.18
  -1  -2   0    3.17    0.31
   1   2   0    3.75    0.24
  -1  -2   0    3.46    0.24
  -1   2   0    3.68    0.25
  -1   2   0    3.80    0.24
   1  -2   0    3.79    0.25
  -1   2   0    3.04    0.36
   1  -2   0    3.67    0.40
   1  -2   0    3.68    0.24
  -2  -2   0    1.71    0.14
   2   2   0    1.93    0.14
   2   2   0    1.82    0.41
  -2   2   0    1.79    0.45
   2  -2   0    1.93    0.14
  -2   2   0    1.77    0.14
  -2  -2   0    2.00    0.38
   2  -2   0    1.41    0.37
   2  -2   0    2.03    0.13
  -2   2   0    2.06    0.13
   3  -2   0   73.61    5.38
   3  -2   0   75.31    4.76
  -3   2   0   68.47    5.09
   3  -2   0   76.23    4.73
  -3  -2   0   65.05    5.02
  -3  -2   0   69.18    4.75
  -3   2   0   67.76    4.76
  -4   2   0    0.03    0.08
   4   2   0    0.01    0.02
   4   2   0    0.02    0.02
   4   2   0    0.03    0.05
   4  -2   0    0.09    0.03
   4  -2   0    0.05    0.08
   4  -2   0    0.04    0.03
   4  -2   0    0.03    0.03
   4  -2   0    0.09    0.02
  -4   2   0    0.03    0.08
   4   2   0    0.02    0.03
  -4  -2   0    0.07    0.03
  -4   2   0    0.05    0.02
  -4  -2   0    0.05    0.06
  -5  -2   0    8.51    0.56
   5  -2   0    8.71    0.56
  -5  -2   0    7.22    0.63
   5   2   0    9.06    0.57
   5   2   0    8.01    0.59
   5  -2   0    8.02    0.56
   6   2   0    8.31    0.53
   6   2   0    7.61    0.53
  -6   2   0    6.65    0.60
  -6   2   0    8.24    0.52
   6  -2   0    7.12    0.53
   6   2   0    8.33    0.54
  -6  -2   0    7.27    0.52
   6  -2   0    8.31    0.53
  -7  -2   0    0.81    0.19
   7  -2   0    0.91    0.09
  -7   2   0    1.01    0.07
  -7   2   0    0.91    0.17
   7  -2   0    1.07    0.09
   8  -2   0    0.04    0.03
  -8   2   0    0.06    0.17
   8   2   0    0.07    0.03
  -8  -2   0    0.03    0.02
   8   2   0    0.03    0.02
   8  -2   0   -0.01    0.02
   0  -3   0    0.01    0.01
   0  -3   0   -0.01    0.06
   0   3   0   -0.01    0.07
  -1  -3   0    0.15    0.01
  -1   3   0    0.15    0.03
   1  -3   0    0.15    0.01
  -1  -3   0    0.13    0.02
   1  -3   0    0.16    0.17
   1  -3   0    0.13    0.02
  -1  -3   0    0.16    0.09
  -1  -3   0    0.22    0.09
  -1   3   0    0.14    0.01
  -2   3   0   56.04    3.56
   2  -3   0   56.96    3.84
  -2   3   0   53.03    3.57
   2  -3   0   55.30    3.56
  -2  -3   0   51.66    3.69
  -2  -3   0   49.44    3.69
  -2   3   0   50.12    3.77
   2  -3   0   53.12    3.57
  -3  -3   0   33.48    2.33
  -3   3   0   37.73    2.32
   3  -3   0   36.90    2.96
  -3   3   0   34.08    2.34
   3  -3   0   34.82    2.34
   3  -3   0   36.00    2.31
  -3   3   0   30.69    2.75
  -3  -3   0   32.77    2.63
   4   3   0    2.10    0.18
  -4   3   0    2.13    0.24
   4  -3   0    2.46    0.25
   4  -3   0    2.07    0.17
  -4  -3   0    2.76    0.19
   4   3   0    2.44    0.17
   4   3   0    2.56    0.17
   4  -3   0    2.43    0.17
  -4   3   0    2.49    0.16
   4   3   0    2.10    0.17
   4  -3   0    2.37    0.18
  -5   3   0    8.80    0.62
  -5   3   0    8.07    0.69
   5   3   0    9.39    0.61
   5  -3   0    9.32    0.63
  -5   3   0    9.59    0.61
   5   3   0    8.85    0.61
   5   3   0    9.44    0.62
   6   3   0   26.77    1.81
  -6   3   0   29.31    1.80
   6  -3   0   24.60    1.81
   6  -3   0   27.97    1.81
  -6  -3   0   25.40    1.80
   6  -3   0   25.88    1.82
   6   3   0   28.13    1.81
  -6   3   0   23.76    1.88
   6   3   0   30.62    1.82
   7  -3   0    7.62    0.53
  -7  -3   0    7.47    0.52
  -7   3   0    7.06    0.60
   7   3   0    8.97    0.53
   7  -3   0    7.59    0.53
   7  -3   0    7.67    0.53
  -8  -3   0    1.87    0.14
   8  -3   0    2.08    0.15
   8  -3   0    2.14    0.15
   0  -4   0   69.58    4.69
  -1   4   0  184.79   11.96
   1  -4   0  169.16   11.96
   2  -4   0    0.10    0.01
   2  -4   0    0.11    0.40
  -2   4   0   -0.06    0.28
  -2   4   0    0.08    0.01
   2   4   0    0.12    0.03
   2  -4   0    0.07    0.03
  -2  -4   0    0.03    0.21
  -2  -4   0    0.08    0.02
  -2  -4   0    0.11    0.21
  -2   4   0    0.08    0.03
   3  -4   0    0.16    0.03
  -3   4   0    0.26    0.06
  -3   4   0    0.19    0.03
   3   4   0    0.22    0.05
  -3  -4   0    0.14    0.05
   3  -4   0    0.19    0.07
  -4   4   0    4.29    0.30
   4   4   0    4.02    0.31
  -4   4   0    4.03    0.37
   4  -4   0    3.70    0.31
  -4   4   0    5.02    0.30
   4  -4   0    4.56    0.31
   4   4   0    4.10    0.30
   4   4   0    4.63    0.30
   4  -4   0    4.42    0.30
   4   4   0    4.88    0.31
   5   4   0    0.10    0.03
   5  -4   0    0.03    0.04
   5  -4   0    0.07    0.04
  -5   4   0    0.09    0.04
  -5  -4   0    0.08    0.03
   5   4   0    0.06    0.02
  -5   4   0    0.05    0.08
  -5  -4   0    0.08    0.14
  -5   4   0    0.12    0.03
   6   4   0   15.94    1.00
   6  -4   0   15.44    1.00
   6  -4   0   13.95    1.00
  -6  -4   0   14.36    1.00
   6   4   0   15.97    1.00
   6  -4   0   14.44    1.01
  -6   4   0   13.64    1.08
   7  -4   0    5.27    0.37
   7  -4   0    5.20    0.36
   7  -4   0    5.26    0.36
  -7   4   0    5.07    0.43
  -7  -4   0    5.22    0.35
  -8  -4   0    1.34    0.10
  -8   4   0    1.38    0.22
   8  -4   0    1.59    0.11
   0   5   0    0.30    0.13
   1  -5   0   16.10    1.33
   1  -5   0   17.19    1.15
  -1   5   0   18.69    1.34
  -1   5   0   17.96    1.15
  -1  -5   0   17.32    1.15
   1  -5   0   16.17    1.16
  -2  -5   0   -0.15    0.21
   2  -5   0    0.02    0.03
   2  -5   0   -0.02    0.65
  -2  -5   0    0.02    0.02
  -2  -5   0   -0.02    0.23
   2  -5   0    0.02    0.01
   3  -5   0   12.07    0.84
  -3   5   0   12.00    0.81
   3  -5   0   12.02    0.81
  -4   5   0   34.13    2.27
   4   5   0   32.81    2.27
  -4   5   0   32.73    2.27
   4  -5   0   35.14    2.28
   4   5   0   31.92    2.28
   4   5   0   36.51    2.27
   5   5   0    3.57    0.24
  -5  -5   0    3.20    0.24
  -5   5   0    3.31    0.32
   5  -5   0    3.13    0.25
  -5   5   0    3.54    0.24
   5   5   0    3.71    0.24
   5  -5   0    3.45    0.25
   6  -5   0    0.17    0.04
  -6  -5   0    0.15    0.03
   6   5   0    0.19    0.03
  -6   5   0    0.15    0.09
   6   5   0    0.21    0.03
   6  -5   0    0.18    0.04
  -6   5   0    0.22    0.05
   6   5   0    0.26    0.06
   6  -5   0    0.16    0.04
   7   5   0    0.00    0.03
   7   5   0   -0.03    0.03
  -7  -5   0   -0.02    0.02
  -7   5   0    0.01    0.08
   7  -5   0    0.02    0.03
   7  -5   0   -0.01    0.03
   7  -5   0   -0.03    0.03
   8  -5   0    0.60    0.06
   8  -5   0    0.58    0.06
  -8   5   0    0.47    0.12
   0  -6   0    0.64    0.05
  -1   6   0    0.23    0.29
  -1  -6   0    0.05    0.01
   1  -6   0    0.01    0.27
   1  -6   0    0.05    0.01
   1  -6   0    0.02    0.03
   2  -6   0    8.79    0.60
   2  -6   0    9.06    0.62
   3   6   0    2.17    0.15
  -3   6   0    2.13    0.23
   3  -6   0    2.23    0.16
   3  -6   0    2.18    0.20
  -3   6   0    2.21    0.16
  -4   6   0   19.92    1.38
  -4   6   0   20.41    1.38
   4   6   0   21.09    1.38
   4   6   0   22.09    1.38
   4  -6   0   21.05    1.39
   4   6   0   19.50    1.39
  -4   6   0   19.97    1.45
   5  -6   0    9.06    0.61
  -5   6   0    9.06    0.68
   5   6   0    9.56    0.60
  -5  -6   0    8.27    0.60
  -5   6   0    9.00    0.60
   5  -6   0    8.12    0.61
  -6   6   0    0.46    0.14
  -6  -6   0    0.41    0.05
   6  -6   0    0.36    0.05
   6   6   0    0.44    0.05
   6  -6   0    0.49    0.06
  -6   6   0    0.51    0.07
   6  -6   0    0.43    0.07
   7   6   0    0.21    0.03
  -7  -6   0    0.14    0.02
   7  -6   0    0.17    0.03
  -7   6   0    0.16    0.08
   7  -6   0    0.17    0.03
  -8  -6   0    2.18    0.16
   8  -6   0    2.41    0.17
  -8   6   0    2.34    0.21
   1  -7   0   33.33    2.15
  -1  -7   0   33.31    2.15
   1  -7   0   29.95    2.16
   2  -7   0    0.55    0.08
  -2   7   0    0.50    0.06
   2  -7   0    0.49    0.05
  -3   7   0    5.44    0.43
  -3   7   0    5.91    0.37
  -3   7   0    5.10    0.37
   3   7   0    5.23    0.37
  -3   7   0    5.22    0.37
  -4   7   0   14.40    0.98
  -4   7   0   15.21    1.06
  -4   7   0   14.72    0.99
   4  -7   0   14.87    0.99
   4   7   0   13.76    0.99
   4   7   0   14.31    0.98
  -5  -7   0    3.34    0.25
  -5   7   0    3.69    0.25
   5   7   0    3.69    0.25
  -5   7   0    3.45    0.25
  -5   7   0    3.65    0.34
   5  -7   0    3.55    0.26
  -6  -7   0    6.17    0.45
   6  -7   0    6.44    0.47
   6   7   0    6.85    0.46
  -6   7   0    6.97    0.54
   6  -7   0    7.25    0.47
   6  -7   0    6.46    0.46
   7  -7   0    6.87    0.50
  -7  -7   0    7.06    0.50
  -7   7   0    7.65    0.56
   7  -7   0    7.18    0.51
   7   7   0    7.69    0.50
   7  -7   0    7.93    0.51
  -8  -7   0    9.73    0.68
  -8   7   0   10.68    0.71
   0  -8   0   31.28    2.09
  -1   8   0    0.82    0.07
   1  -8   0    0.70    0.08
  -1  -8   0    0.83    0.06
   1  -8   0    0.76    0.06
  -1   8   0    0.78    0.07
  -2   8   0    1.02    0.08
   2   8   0    0.97    0.08
  -2   8   0    0.95    0.08
  -2   8   0    0.89    0.08
  -2   8   0    1.17    0.18
  -3   8   0    0.14    0.09
  -3   8   0    0.09    0.03
   3   8   0    0.18    0.05
  -3   8   0    0.06    0.02
  -3   8   0    0.12    0.03
   3   8   0    0.10    0.02
  -4   8   0    0.04    0.03
  -4   8   0    0.06    0.03
   4  -8   0    0.05    0.04
  -4   8   0    0.05    0.08
   4   8   0    0.05    0.02
  -5   8   0    2.06    0.16
   5  -8   0    2.16    0.17
   5   8   0    2.25    0.16
  -5  -8   0    2.14    0.16
  -5   8   0    2.24    0.16
  -5   8   0    2.41    0.26
   6  -8   0    1.22    0.11
  -6   8   0    1.42    0.24
  -6  -8   0    1.28    0.10
  -7   8   0    1.10    0.14
   7  -8   0    0.98    0.09
  -7  -8   0    0.95    0.07
   7  -8   0    0.89    0.08
   0  -9   0   -0.04    0.02
   0   9   0    0.00    0.02
   0   9   0   -0.03    0.02
  -1   9   0   12.58    0.84
   1   9   0   11.76    0.84
   1  -9   0   12.04    0.85
  -1   9   0   12.54    0.84
   1  -9   0   12.09    0.84
  -1   9   0   12.30    0.84
   1   9   0   13.99    0.84
  -1  -9   0   12.85    0.84
  -2   9   0    1.52    0.11
  -2   9   0    1.45    0.11
   2   9   0    1.74    0.15
  -2   9   0    1.44    0.11
   2   9   0    1.46    0.11
   2   9   0    1.19    0.12
   3   9   0    1.00    0.08
  -3   9   0    1.08    0.09
  -3   9   0    1.25    0.18
  -3   9   0    0.91    0.08
  -4   9   0    6.87    0.49
   4   9   0    7.18    0.49
  -4   9   0    8.24    0.58
  -4   9   0    7.06    0.49
   4  -9   0    6.64    0.50
   5  -9   0    2.47    0.20
   5   9   0    2.49    0.19
  -5   9   0    3.06    0.28
  -5   9   0    2.68    0.19
  -5   9   0    2.60    0.19
  -6   9   0   -0.01    0.07
   6   9   0    0.00    0.02
   6  -9   0   -0.04    0.03
  -6  -9   0    0.05    0.03
   6  -9   0    0.00    0.03
   7  -9   0    0.25    0.04
  -7  -9   0    0.29    0.04
  -7   9   0    0.35    0.10
   7  -9   0    0.29    0.06
   0  10   0   29.17    1.91
   0  10   0   27.09    1.91
   0  10   0   29.38    1.91
   1  10   0   29.68    2.21
  -1  10   0   32.99    2.21
  -1  10   0   33.00    2.21
   1  10   0   30.48    2.21
  -1  10   0   33.80    2.21
   1  10   0   37.95    2.21
  -2  10   0    0.44    0.05
  -2  10   0    0.55    0.05
   2  10   0    0.45    0.06
  -2  10   0    0.43    0.05
   2  10   0    0.41    0.05
   2  10   0    0.50    0.11
  -3  10   0    3.05    0.22
  -3  10   0    3.21    0.22
   3  10   0    3.01    0.22
  -3  10   0    3.37    0.22
  -4  10   0    2.18    0.16
   4  10   0    2.07    0.16
   4 -10   0    2.03    0.18
  -4  10   0    2.61    0.17
  -4  10   0    2.12    0.16
  -4  10   0    2.62    0.26
   5 -10   0    0.02    0.04
   5  10   0    0.02    0.02
  -5  10   0    0.03    0.03
  -5  10   0    0.07    0.09
   6  10   0    0.09    0.02
   6 -10   0    0.04    0.03
  -6 -10   0    0.10    0.03
  -6  10   0    0.10    0.07
   6 -10   0    0.07    0.03
  -7 -10   0    3.95    0.28
   7 -10   0    3.75    0.29
  -7  10   0    4.58    0.33
  -7  10   0    4.59    0.29
   0  11   0   -0.01    0.04
   0  11   0    0.00    0.02
  -1  11   0    0.08    0.04
  -1  11   0    0.02    0.02
  -1  11   0    0.00    0.02
   1  11   0    0.00    0.03
  -1  11   0    0.05    0.03
   1  11   0    0.12    0.05
   1  11   0    0.04    0.03
   2  11   0    0.72    0.07
   2  11   0    0.77    0.07
  -2  11   0    0.74    0.07
  -2  11   0    0.83    0.07
  -2  11   0    0.78    0.07
  -3  11   0    2.48    0.16
   3 -11   0    2.03    0.18
   3  11   0    2.08    0.16
  -3  11   0    2.25    0.16
  -3  11   0    2.24    0.16
   4 -11   0    0.76    0.09
  -4  11   0    0.77    0.07
  -4  11   0    0.96    0.08
  -4  11   0    0.82    0.07
   4  11   0    0.81    0.07
   5 -11   0    3.95    0.30
  -5  11   0    4.49    0.29
   5  11   0    4.21    0.29
  -6  11   0    3.03    0.18
   6 -11   0    2.30    0.19
  -6 -11   0    2.48    0.18
   6 -11   0    2.29    0.18
   6  11   0    2.55    0.18
  -7  11   0    0.12    0.03
   0  12   0   -0.01    0.04
   0  12   0    0.05    0.02
   0  12   0    0.00    0.02
  -1  12   0    0.04    0.02
   1  12   0   -0.03    0.03
   1  12   0    0.05    0.02
   1  12   0    0.09    0.05
  -1  12   0    0.00    0.03
  -1  12   0    0.04    0.02
  -2  12   0   39.60    2.50
  -2  12   0   39.63    2.51
   2  12   0   33.25    2.50
   2  12   0   39.32    2.51
   2  12   0   34.67    2.50
  -2  12   0   37.77    2.50
  -3  12   0    3.47    0.25
  -3  12   0    3.53    0.25
  -3  12   0    3.86    0.25
   3  12   0    3.33    0.24
  -4  12   0    0.02    0.03
  -4  12   0    0.03    0.09
  -4  12   0    0.03    0.03
  -4  12   0    0.01    0.02
   4  12   0    0.03    0.02
   4 -12   0    0.04    0.05
  -5  12   0    3.00    0.19
  -5  12   0    2.60    0.19
   5  12   0    2.38    0.18
   6  12   0    0.11    0.02
   6 -12   0    0.10    0.02
  -6  12   0    0.19    0.04
  -6  12   0    0.15    0.08
   0  13   0    0.02    0.04
   0  13   0    0.01    0.02
   0  13   0    0.01    0.02
  -1  13   0    0.00    0.02
  -1  13   0    0.05    0.02
   1  13   0    0.03    0.03
  -1  13   0    0.06    0.04
   1  13   0    0.04    0.06
   1  13   0    0.03    0.02
  -2  13   0    1.14    0.09
  -2  13   0    1.34    0.10
  -2  13   0    1.08    0.09
   2  13   0    1.06    0.09
  -3  13   0   25.04    1.61
  -3  13   0   22.74    1.55
  -3  13   0   21.33    1.55
  -4  13   0    6.43    0.44
  -4  13   0    6.68    0.50
  -4  13   0    7.11    0.45
  -4  13   0    5.72    0.44
  -5  13   0    1.61    0.17
  -5  13   0    1.83    0.12
   5  13   0    1.41    0.11
  -5  13   0    1.49    0.12
   6 -13   0    1.42    0.11
  -6  13   0    1.61    0.11
   0  14   0    1.45    0.11
   0  14   0    1.64    0.13
   0  14   0    1.36    0.11
   1  14   0    0.20    0.04
  -1  14   0    0.13    0.03
   1  14   0    0.13    0.03
  -1  14   0    0.15    0.03
  -1  14   0    0.20    0.04
  -2  14   0    0.57    0.06
   2  14   0    0.54    0.06
  -2  14   0    0.69    0.07
  -2  14   0    0.59    0.06
  -3  14   0    0.57    0.06
  -3  14   0    0.53    0.06
  -3  14   0    0.65    0.07
   4  14   0    0.35    0.05
  -4  14   0    0.41    0.14
  -4  14   0    0.55    0.05
  -4  14   0    0.46    0.05
  -4  14   0    0.46    0.05
  -5  14   0    0.13    0.03
  -5  14   0    0.10    0.03
  -5  14   0    0.15    0.09
   0  15   0   -0.01    0.02
   0  15   0    0.00    0.05
   1  15   0    0.23    0.04
  -1  15   0    0.22    0.05
  -1  15   0    0.18    0.04
  -2  15   0    7.76    0.51
   2  15   0    6.79    0.50
  -2  15   0    7.71    0.51
  -2  15   0    7.58    0.51
  -3  15   0    5.54    0.39
  -3  15   0    5.75    0.39
  -3  15   0    5.66    0.39
  -4  15   0   15.03    1.01
  -4  15   0   14.97    1.01
   5 -15   0    1.98    0.14
   0  16   0    0.06    0.02
   0  16   0    0.04    0.02
   1  16   0    0.80    0.07
  -1  16   0    0.65    0.08
   1  16   0    0.70    0.06
  -1  16   0    0.72    0.06
  -1  16   0    0.76    0.06
   2  16   0    9.69    0.67
  -2  16   0   10.50    0.67
  -2  16   0    9.03    0.67
  -2  16   0   10.66    0.67
  -3  16   0   19.69    1.31
  -3  16   0   19.23    1.30
  -4  16   0    0.49    0.05
   0  17   0    0.02    0.02
   0  17   0    0.02    0.02
  -1  17   0    1.22    0.09
   1  17   0    1.16    0.09
  -1  17   0    1.13    0.09
  -2  17   0    1.25    0.09
  -2  17   0    1.27    0.09
  -3  17   0    1.41    0.10
  -3  17   0    1.41    0.10
   0  18   0   10.27    0.71
   0  18   0   10.78    0.71
  -1  18   0   -0.02    0.02
  -1  18   0   -0.04    0.02
  -2  18   0    0.07    0.02
  -2  18   0    0.07    0.02
   0   0  -1   -0.10    0.07
  -1   0  -1   35.21    2.46
  -1   0  -1   33.08    2.45
   1   0  -1   36.63    2.47
  -1   0   1   36.77    2.46
  -2   0   1   34.81    2.15
   2   0   1   33.42    2.15
   2   0   1   35.48    2.37
  -2   0  -1   28.69    2.16
  -2   0  -1   28.41    2.32
   2   0  -1   35.57    2.39
  -2   0   1   32.36    2.33
   2   0  -1   32.73    2.16
   2   0   1   29.89    2.16
  -2   0   1   30.95    2.16
   3   0  -1    1.34    0.12
  -3   0   1    0.95    0.49
   3   0   1    1.44    0.09
  -3   0  -1    0.62    0.46
  -3   0  -1    1.18    0.11
   3   0  -1    1.44    0.66
   3   0   1    1.22    0.11
  -3   0   1    1.42    0.09
  -3   0   1    1.16    0.12
   4   0   1    2.01    0.16
  -4   0  -1    2.27    0.16
   4   0   1    2.19    0.17
   4   0  -1    2.09    0.16
   4   0  -1    2.64    0.16
   4   0  -1    2.43    0.17
  -4   0   1    2.19    0.16
  -4   0   1    1.88    0.24
   4   0   1    2.30    0.21
   4   0   1    2.58    0.16
  -4   0  -1    2.08    0.20
  -4   0   1    2.45    0.16
   5   0   1    1.82    0.14
   5   0  -1    2.01    0.15
  -5   0  -1    1.73    0.13
   5   0  -1    1.62    0.14
  -5   0   1    1.58    0.22
   5   0   1    1.83    0.15
  -5   0   1    1.73    0.13
   5   0  -1    1.91    0.16
   5   0   1    2.15    0.14
  -5   0  -1    1.67    0.22
   5   0  -1    2.16    0.13
   6   0   1    6.52    0.44
   6   0  -1    6.02    0.43
   6   0   1    6.15    0.43
   6   0  -1    6.77    0.44
  -6   0  -1    5.47    0.50
   6   0   1    6.82    0.43
  -6   0  -1    6.39    0.43
  -6   0   1    6.38    0.43
   7   0   1    0.11    0.04
  -7   0   1    0.09    0.10
  -7   0  -1    0.08    0.10
   7   0   1    0.11    0.04
   7   0  -1    0.13    0.03
   7   0   1    0.13    0.04
   7   0  -1    0.14    0.05
   8   0   1    9.42    0.61
   8   0  -1    8.69    0.62
   8   0   1    9.76    0.62
   8   0  -1    8.40    0.61
   0   1  -1   40.64    2.75
   0  -1  -1   40.62    2.78
  -1  -1  -1  151.09   10.20
  -1  -1  -1  154.11   10.23
   1   1  -1  149.20   10.20
   1  -1   1  152.92   10.22
  -1   1   1  156.85   10.22
   1  -1  -1  162.43   10.24
  -1   1  -1  138.14   10.21
  -1  -1   1  147.02   10.19
  -2  -1  -1   67.97    5.22
   2   1  -1   82.27    5.25
   2  -1   1   80.93    5.27
  -2   1   1   71.95    5.22
  -2   1  -1   73.04    5.24
   2  -1  -1   79.35    5.28
  -2  -1   1   72.82    5.33
  -3  -1  -1   13.68    1.00
   3  -1   1   16.23    0.98
   3  -1   1   13.45    1.01
   3   1  -1   15.68    1.00
  -3   1   1   12.67    1.42
  -3  -1  -1   12.51    1.41
  -3   1   1   15.18    1.00
  -3  -1  -1   13.00    1.39
  -3   1   1   16.61    0.98
   3   1  -1   15.64    1.53
  -3  -1   1   16.68    0.98
  -3   1  -1   13.69    1.00
   3  -1  -1   14.83    1.59
   3  -1  -1   15.68    1.01
  -3  -1   1   13.00    1.37
  -3   1  -1   12.75    1.45
  -3  -1   1   14.89    1.00
   3   1   1   14.83    1.00
  -4  -1  -1    3.37    0.29
   4  -1   1    3.73    0.26
  -4   1   1    3.27    0.33
   4  -1   1    3.39    0.26
  -4   1   1    4.23    0.26
   4   1  -1    3.89    0.27
  -4  -1  -1    3.76    0.25
   4  -1   1    3.63    0.30
   4   1  -1    3.90    0.27
   4   1  -1    3.57    0.26
   4   1  -1    4.16    0.26
  -4   1   1    3.93    0.25
  -4   1  -1    3.50    0.30
   4   1   1    3.79    0.26
   4  -1  -1    3.42    0.26
   4  -1  -1    3.91    0.31
   4   1   1    3.43    0.26
  -4   1  -1    3.34    0.33
  -4  -1   1    4.12    0.25
  -4   1  -1    3.82    0.25
   4  -1  -1    3.81    0.27
  -4  -1   1    3.75    0.26
   5  -1   1   14.26    0.98
   5   1  -1   13.84    1.00
  -5   1   1   13.23    1.05
   5  -1   1   16.39    0.98
  -5  -1  -1   13.71    0.98
  -5  -1  -1   13.16    1.04
  -5  -1   1   14.56    0.98
   5  -1  -1   13.92    0.98
   5  -1  -1   15.89    0.98
   5   1   1   17.14    0.98
  -5   1  -1   13.18    1.04
   5   1   1   16.36    0.98
  -5  -1   1   12.96    1.05
   6   1  -1    3.69    0.27
  -6   1   1    4.00    0.27
   6   1  -1    4.30    0.28
   6  -1   1    4.00    0.28
  -6  -1  -1    3.33    0.35
  -6   1   1    3.29    0.35
   6  -1   1    3.97    0.27
   6   1  -1    4.32    0.27
   6  -1   1    3.71    0.27
  -6  -1  -1    3.90    0.27
  -6   1  -1    3.38    0.35
   6  -1  -1    3.75    0.27
   6  -1  -1    4.04    0.27
   6   1   1    4.24    0.28
   6   1   1    3.95    0.27
   6  -1  -1    4.08    0.28
   6   1   1    4.17    0.27
  -6  -1   1    3.40    0.36
  -6  -1   1    3.86    0.27
  -6   1  -1    4.08    0.26
  -7  -1  -1    4.68    0.44
   7  -1   1    6.02    0.40
  -7   1   1    4.63    0.44
   7  -1   1    5.26    0.37
   7   1  -1    5.15    0.37
   7   1  -1    6.02    0.40
  -7   1   1    5.39    0.36
  -7   1  -1    4.62    0.43
  -7   1  -1    5.50    0.36
   7  -1  -1    6.08    0.39
   7   1   1    5.65    0.38
   8   1  -1    8.50    0.58
   8   1  -1    9.26    0.58
   8  -1   1    8.71    0.58
   8  -1   1    8.68    0.58
   8  -1  -1    8.08    0.58
   8  -1  -1    7.99    0.58
   0   2  -1   35.44    2.30
   0  -2  -1   32.32    2.32
   1  -2   1  214.53   14.53
   1   2  -1  204.05   14.49
  -1  -2  -1  215.33   14.51
  -1  -2   1  240.31   14.49
  -1   2  -1  196.09   14.52
   1  -2  -1  225.41   14.56
  -2  -2  -1   23.37    1.76
   2  -2   1   25.85    1.87
  -2  -2  -1   21.58    1.61
   2   2  -1   24.61    1.79
   2   2  -1   23.68    1.61
  -2   2   1   25.30    1.60
   2  -2   1   24.96    1.60
  -2  -2  -1   22.32    1.77
  -2   2   1   24.92    1.61
   2  -2   1   22.48    1.61
  -2   2   1   22.41    1.80
  -2   2  -1   24.95    1.60
  -2   2  -1   21.85    1.61
  -2   2  -1   21.34    1.81
  -2  -2   1   24.32    1.61
   2  -2  -1   25.02    1.60
   2  -2  -1   26.33    1.89
   2   2   1   24.33    1.61
  -2  -2   1   23.65    1.76
   2  -2  -1   24.68    1.61
  -3  -2  -1   19.10    2.29
   3  -2   1   25.27    2.14
  -3  -2  -1   20.64    1.55
   3  -2   1   25.38    1.53
   3   2  -1   21.69    1.97
  -3   2   1   19.66    1.93
   3  -2   1   23.11    1.55
  -3   2   1   25.31    1.53
  -3  -2  -1   20.00    1.89
  -3  -2   1   20.53    1.87
  -3   2  -1   19.55    1.99
   3   2   1   24.28    1.55
  -3  -2   1   24.97    1.53
  -3  -2   1   23.32    1.55
  -3   2  -1   21.00    1.55
   3  -2  -1   24.54    1.53
   3  -2  -1   25.73    1.57
   3  -2  -1   23.91    2.23
   4  -2   1   15.98    0.96
  -4  -2  -1   13.92    0.96
   4   2  -1   14.78    0.97
  -4  -2  -1   12.85    0.99
  -4   2   1   15.09    0.96
   4   2  -1   15.87    0.96
   4  -2   1   13.18    0.96
   4  -2   1   14.53    0.97
   4  -2   1   14.01    1.00
  -4   2   1   12.79    1.03
   4   2  -1   13.02    0.96
  -4   2   1   14.94    0.96
   4   2   1   13.49    0.96
  -4   2  -1   12.88    1.02
   4  -2  -1   15.40    0.97
   4  -2  -1   13.03    0.96
   4   2   1   14.80    0.97
  -4   2  -1   15.41    0.96
  -4  -2   1   14.11    0.96
   4  -2  -1   14.36    1.01
   4  -2  -1   16.05    0.96
   4   2   1   15.42    0.96
  -4   2  -1   13.22    1.00
   5  -2   1    4.60    0.37
  -5   2   1    4.97    0.56
   5   2  -1    5.36    0.40
   5  -2   1    5.76    0.37
   5  -2   1    5.05    0.38
  -5   2   1    5.78    0.37
   5   2  -1    5.40    0.37
  -5  -2  -1    4.56    0.44
   5  -2  -1    5.87    0.38
   5   2   1    5.91    0.37
   5   2   1    6.05    0.36
  -5  -2   1    4.65    0.44
   5   2   1    5.39    0.37
  -5  -2   1    5.08    0.37
   6  -2   1    4.73    0.33
   6  -2   1    5.14    0.33
  -6   2   1    4.02    0.41
   6   2  -1    5.11    0.33
   6  -2   1    4.53    0.33
   6   2  -1    5.03    0.32
  -6   2   1    4.82    0.32
   6   2  -1    4.59    0.32
  -6  -2  -1    4.50    0.32
  -6   2  -1    4.98    0.32
   6   2   1    5.11    0.33
   6  -2  -1    4.24    0.33
   6  -2  -1    4.97    0.33
   6   2   1    4.67    0.32
  -6   2  -1    4.13    0.40
   6   2   1    4.82    0.33
  -6  -2   1    3.90    0.41
   6   2   1    5.10    0.32
  -6  -2   1    4.59    0.32
   7  -2   1    0.36    0.06
  -7   2   1    0.37    0.14
  -7   2   1    0.42    0.04
   7  -2   1    0.38    0.06
   7  -2   1    0.40    0.07
  -7  -2  -1    0.37    0.23
   7   2  -1    0.50    0.07
  -7   2  -1    0.38    0.14
  -7  -2   1    0.28    0.15
  -7   2  -1    0.42    0.04
   7   2   1    0.36    0.06
   7   2   1    0.48    0.09
   7  -2  -1    0.33    0.06
   7  -2  -1    0.45    0.10
   8  -2   1    3.82    0.24
  -8  -2  -1    3.14    0.23
  -8   2   1    3.02    0.29
   8  -2   1    3.77    0.24
  -8  -2   1    3.18    0.23
   8  -2  -1    3.45    0.24
   8  -2  -1    3.61    0.24
   0  -3  -1   57.84    3.93
  -1   3   1   28.02    1.85
   1  -3   1   28.38    1.98
   1  -3   1   25.06    1.85
  -1  -3  -1   29.47    1.93
   1  -3   1   26.55    1.85
   1   3  -1   27.69    1.90
  -1   3  -1   29.06    1.86
   1  -3  -1   30.42    2.08
  -1   3  -1   23.22    1.96
   1  -3  -1   29.02    1.86
   1  -3  -1   27.10    1.85
  -2  -3  -1    9.49    0.78
   2   3  -1    8.42    0.57
   2  -3   1    8.91    0.57
  -2  -3  -1    7.61    0.77
   2  -3   1    7.75    0.90
   2   3  -1    8.44    0.78
  -2  -3  -1    7.88    0.57
   2  -3   1    8.22    0.58
  -2   3   1    7.40    0.82
  -2   3   1    9.24    0.57
   2  -3  -1    9.13    0.97
  -2   3  -1    7.13    0.83
   2  -3  -1    9.22    0.58
  -2   3  -1    7.83    0.58
   2  -3  -1    8.97    0.57
  -2  -3   1    8.85    0.76
   3   3  -1   17.32    1.37
   3  -3   1   21.38    2.05
  -3   3   1   22.43    1.36
   3  -3   1   19.96    1.38
  -3   3   1   18.14    1.84
  -3  -3  -1   18.84    1.37
  -3  -3  -1   19.39    1.87
   3   3  -1   21.68    2.21
   3  -3   1   22.20    1.36
   3  -3  -1   21.00    1.36
  -3   3  -1   19.22    1.38
   3  -3  -1   20.50    2.12
   3  -3  -1   21.50    1.39
  -4  -3  -1    3.84    0.28
  -4   3   1    4.36    0.28
   4  -3   1    4.24    0.35
   4  -3   1    4.04    0.29
   4   3  -1    4.56    0.28
   4   3  -1    4.32    0.29
  -4   3   1    4.12    0.29
   4   3  -1    4.18    0.29
  -4   3   1    4.41    0.28
   4  -3   1    4.21    0.28
   4   3  -1    3.76    0.28
  -4   3   1    3.66    0.35
   4  -3   1    3.51    0.29
  -4   3  -1    3.66    0.34
   4  -3  -1    4.11    0.35
   4   3   1    4.35    0.29
  -4   3  -1    4.52    0.28
   4  -3  -1    3.65    0.29
   4  -3  -1    4.33    0.28
  -4   3  -1    3.71    0.33
   4   3   1    3.88    0.28
   4  -3  -1    4.31    0.29
   4   3   1    4.25    0.28
  -5   3   1    6.81    0.59
  -5   3   1    7.34    0.51
   5   3  -1    7.66    0.52
  -5  -3  -1    7.37    0.51
   5  -3   1    7.29    0.52
   5   3  -1    7.76    0.51
   5   3  -1    6.89    0.51
  -5   3   1    7.91    0.51
   5   3   1    8.20    0.51
   5   3   1    8.21    0.52
   5   3   1    7.34    0.51
  -5   3  -1    6.60    0.58
   5   3   1    7.74    0.51
  -5   3  -1    8.13    0.51
   5  -3  -1    7.63    0.52
   6  -3   1   32.76    2.11
   6  -3   1   30.24    2.11
  -6   3   1   33.26    2.10
  -6  -3  -1   29.71    2.10
   6  -3   1   29.29    2.11
   6   3  -1   30.83    2.10
   6   3  -1   33.72    2.11
  -6   3   1   27.45    2.18
   6   3  -1   33.02    2.11
   6  -3  -1   32.39    2.11
   6   3   1   35.65    2.11
  -6   3  -1   27.38    2.17
  -6  -3   1   29.84    2.10
   6   3   1   33.08    2.10
   6  -3  -1   31.01    2.12
  -6   3  -1   34.88    2.10
   6  -3  -1   28.28    2.11
   6   3   1   32.21    2.10
   7  -3   1   12.33    0.84
  -7   3   1   11.37    0.91
   7  -3   1   12.79    0.83
  -7  -3  -1   12.31    0.83
   7   3  -1   14.08    0.83
   7  -3   1   12.75    0.83
  -7  -3   1   11.98    0.83
   7  -3  -1   12.62    0.84
   7  -3  -1   12.07    0.83
   7  -3  -1   11.90    0.83
  -7   3  -1   11.57    0.90
   8  -3   1    2.61    0.17
  -8   3   1    2.12    0.22
  -8  -3  -1    2.24    0.16
   8  -3  -1    2.45    0.17
  -8  -3   1    2.24    0.16
   8  -3  -1    2.51    0.17
  -8   3  -1    2.16    0.22
   0  -4  -1    8.84    0.62
   0   4  -1   10.16    0.67
   0  -4   1    9.14    0.62
   0  -4  -1    8.89    0.71
   0   4   1    9.14    0.62
  -1  -4  -1   48.58    3.23
  -1   4   1   47.65    3.15
  -1   4  -1   45.13    3.29
   1  -4  -1   47.37    3.33
  -2   4   1    6.49    0.41
   2  -4   1    6.07    0.42
  -2  -4  -1    5.68    0.41
  -2  -4  -1    5.27    0.63
   2  -4   1    5.85    0.83
  -2   4   1    5.87    0.75
   2   4  -1    5.15    0.42
   2  -4   1    6.49    0.41
  -2   4  -1    4.66    0.74
   2  -4  -1    6.35    0.92
   2  -4  -1    6.50    0.43
   2  -4  -1    6.60    0.41
  -2  -4   1    6.60    0.62
  -2   4  -1    6.08    0.42
   3  -4   1    0.33    0.03
  -3  -4  -1    0.28    0.05
   3  -4   1    0.28    0.07
  -3   4   1    0.28    0.04
   3   4  -1    0.26    0.05
   3  -4  -1    0.24    0.08
   3   4   1    0.33    0.06
   4  -4   1   10.57    0.72
  -4   4   1   11.83    0.71
   4   4  -1   11.79    0.72
   4   4  -1   10.72    0.72
  -4   4   1   10.04    0.78
   4  -4   1    9.21    0.72
  -4   4   1   10.42    0.72
  -4  -4  -1    9.76    0.71
   4   4  -1   11.50    0.72
   4   4  -1    9.70    0.71
   4  -4   1   10.52    0.72
  -4   4  -1   10.10    0.78
   4   4   1   10.75    0.71
  -4   4  -1   10.41    0.72
   4   4   1   10.33    0.71
   4   4   1   10.28    0.73
   4  -4  -1   11.40    0.73
   4  -4  -1    9.58    0.72
  -4   4  -1   12.39    0.71
   5   4  -1   12.24    0.85
  -5  -4  -1   11.93    0.85
   5   4  -1   14.13    0.86
   5  -4   1   11.71    0.85
   5   4  -1   12.42    0.86
   5  -4   1   12.47    0.86
  -5   4   1   14.58    0.85
   5   4  -1   13.37    0.85
  -5   4   1   11.39    0.93
   5  -4  -1   11.22    0.85
  -5  -4   1   11.90    0.85
  -5   4  -1   12.60    0.85
   5   4   1   12.87    0.85
  -5   4  -1   13.91    0.85
   5  -4  -1   12.97    0.86
   5   4   1   13.09    0.85
  -5   4  -1   11.58    0.92
   6   4  -1   24.07    1.52
  -6   4   1   20.78    1.60
   6  -4   1   23.68    1.52
  -6  -4  -1   21.91    1.51
   6   4  -1   23.62    1.52
   6  -4   1   21.28    1.52
   6  -4   1   21.58    1.53
  -6  -4   1   21.86    1.52
   6  -4  -1   22.93    1.52
   6   4   1   23.90    1.52
   6   4   1   25.78    1.52
   6  -4  -1   20.69    1.52
   6  -4  -1   23.00    1.53
  -6   4  -1   21.24    1.59
   7  -4   1    0.18    0.04
  -7  -4  -1    0.19    0.03
   7   4  -1    0.34    0.06
   7   4  -1    0.25    0.03
   7   4  -1    0.25    0.04
   7  -4   1    0.27    0.05
  -7   4   1    0.24    0.12
   7  -4   1    0.23    0.04
   7  -4  -1    0.26    0.04
   7  -4  -1    0.18    0.03
   7   4   1    0.32    0.04
   7  -4  -1    0.27    0.05
  -7  -4   1    0.20    0.03
  -7   4  -1    0.22    0.12
  -8   4   1    0.79    0.19
  -8  -4  -1    0.80    0.06
   8  -4   1    0.94    0.09
   8  -4  -1    0.94    0.07
  -8  -4   1    0.77    0.06
  -8   4  -1    0.78    0.14
   8  -4  -1    0.86    0.09
   0  -5   1    4.48    0.31
   0  -5  -1    4.21    0.42
   0  -5  -1    4.93    0.31
   0  -5  -1    4.47    0.31
   0   5   1    4.67    0.31
  -1  -5  -1   22.27    1.63
   1  -5   1   21.97    1.59
  -1  -5  -1   24.97    1.58
   1  -5   1   24.89    1.58
  -1   5   1   24.69    1.58
  -1  -5   1   24.65    1.58
  -1   5  -1   26.33    1.59
   1  -5  -1   23.01    1.58
   1  -5  -1   22.21    1.78
   1  -5  -1   21.90    1.59
  -1   5  -1   22.78    1.74
   2  -5   1    5.60    0.37
  -2   5   1    4.96    0.80
  -2  -5  -1    5.14    0.38
   2  -5   1    5.34    0.39
  -2  -5  -1    5.17    0.60
   2  -5  -1    5.42    0.37
   2  -5  -1    5.57    0.99
  -2   5  -1    5.59    0.39
   2  -5  -1    5.70    0.39
  -2  -5   1    5.88    0.37
  -3   5   1   17.52    1.18
  -3  -5  -1   16.01    1.19
   3  -5   1   16.95    1.20
   3  -5   1   17.63    1.18
   3   5  -1   19.87    1.18
   3  -5  -1   17.07    1.18
   3  -5  -1   17.99    1.21
  -3   5  -1   17.20    1.24
   4   5  -1    4.30    0.30
   4  -5   1    3.82    0.32
   4  -5   1    4.46    0.32
   4   5  -1    4.52    0.32
  -4   5   1    4.25    0.38
   4   5  -1    4.83    0.31
  -4   5   1    4.39    0.31
   4  -5  -1    3.94    0.32
  -4   5  -1    4.47    0.31
   4  -5  -1    4.75    0.32
  -4   5  -1    4.35    0.37
   4   5   1    4.84    0.30
   4   5   1    4.76    0.30
  -5   5   1   12.39    0.83
   5  -5   1   12.08    0.84
   5  -5   1   11.76    0.83
   5   5  -1   12.69    0.83
   5   5  -1   12.33    0.84
  -5  -5  -1   11.63    0.83
  -5   5   1   11.57    0.91
   5   5  -1   13.17    0.83
  -5   5  -1   12.10    0.91
  -5   5  -1   12.62    0.83
   5   5   1   13.92    0.83
   5  -5  -1   10.88    0.83
   5  -5  -1   12.95    0.84
   5   5   1   12.56    0.83
  -5  -5   1   11.86    0.83
   6  -5   1   20.96    1.49
   6   5  -1   23.78    1.49
  -6   5   1   21.04    1.57
   6   5  -1   24.87    1.49
  -6  -5  -1   21.09    1.49
  -6   5   1   22.23    1.49
   6  -5   1   21.40    1.50
   6  -5   1   22.99    1.49
   6  -5  -1   20.72    1.49
  -6   5  -1   21.93    1.57
  -6  -5   1   21.35    1.49
   6   5   1   23.19    1.49
   6  -5  -1   22.35    1.50
   6  -5  -1   22.25    1.49
   7  -5   1    1.13    0.09
   7  -5   1    1.08    0.09
  -7   5   1    1.07    0.17
   7  -5   1    1.13    0.09
  -7  -5  -1    1.02    0.08
   7   5  -1    1.19    0.09
   7  -5  -1    1.11    0.10
   7  -5  -1    1.11    0.09
  -7  -5   1    1.13    0.08
  -7   5  -1    1.11    0.16
   7  -5  -1    1.06    0.09
   8   5  -1    0.65    0.06
   8  -5   1    0.57    0.06
   8  -5   1    0.53    0.06
  -8   5   1    0.48    0.12
   8  -5  -1    0.55    0.06
   8  -5  -1    0.59    0.06
  -8   5  -1    0.56    0.12
   0  -6  -1    8.71    0.58
   0  -6  -1    8.39    0.59
   0  -6   1    9.05    0.59
  -1  -6  -1    3.87    0.25
  -1   6   1    4.00    0.26
   1  -6   1    3.48    0.26
   1  -6   1    3.72    0.25
  -1  -6   1    3.71    0.25
  -1   6  -1    3.67    0.56
   1  -6  -1    3.67    0.26
   1  -6  -1    3.60    0.25
   1  -6  -1    3.24    0.64
   2  -6   1    5.43    0.39
   2  -6   1    5.48    0.38
  -2   6   1    5.90    0.38
  -2  -6  -1    5.48    0.60
   2  -6  -1    5.40    0.38
   2  -6  -1    5.56    0.40
  -2  -6   1    5.61    0.37
   3  -6   1   13.15    0.93
  -3   6   1   13.52    0.99
  -3   6   1   13.14    0.93
   3  -6   1   15.04    1.01
  -3  -6  -1   13.21    0.94
   3   6  -1   14.19    0.93
   3  -6  -1   13.10    0.93
   3   6   1   13.14    0.93
  -3   6  -1   13.84    0.99
   3  -6  -1   13.87    0.98
  -3   6  -1   15.69    0.93
  -3   6  -1   13.70    0.93
  -4   6   1   11.74    0.90
   4   6  -1   12.16    0.83
  -4   6   1   12.19    0.83
   4   6  -1   13.22    0.83
   4   6  -1   12.61    0.84
   4  -6   1   11.76    0.84
   4  -6  -1   13.06    0.84
   4   6   1   12.38    0.83
  -4   6  -1   11.77    0.83
  -4   6  -1   12.23    0.83
  -4   6  -1   12.43    0.90
  -5   6   1    7.23    0.58
  -5  -6  -1    6.74    0.48
  -5   6   1    7.23    0.49
  -5   6   1    7.15    0.49
   5   6  -1    7.24    0.50
   5   6  -1    7.34    0.49
   5  -6   1    7.05    0.50
   5   6  -1    7.98    0.48
   5  -6   1    6.64    0.49
  -5   6  -1    7.41    0.49
  -5  -6   1    6.69    0.49
   5   6   1    7.37    0.49
   5  -6  -1    7.49    0.50
  -5   6  -1    7.37    0.57
   5  -6  -1    6.34    0.49
   6   6  -1    1.94    0.14
  -6  -6  -1    1.76    0.13
   6  -6   1    1.81    0.15
   6  -6   1    1.93    0.15
  -6   6   1    1.88    0.23
  -6   6   1    2.00    0.14
   6  -6   1    1.87    0.14
   6  -6  -1    1.86    0.15
  -6   6  -1    1.94    0.23
   6  -6  -1    1.93    0.15
  -6  -6   1    1.77    0.14
  -7  -6  -1    0.06    0.02
   7  -6   1    0.07    0.03
   7  -6   1    0.03    0.03
   7  -6   1    0.06    0.03
  -7   6   1    0.08    0.08
   7   6  -1    0.06    0.02
   7  -6  -1    0.06    0.03
   7  -6  -1    0.06    0.03
  -7  -6   1    0.05    0.02
  -7   6  -1    0.07    0.07
   7   6   1    0.13    0.03
   7  -6  -1    0.07    0.03
  -8  -6  -1    2.19    0.16
  -8   6   1    2.49    0.21
   8  -6  -1    2.54    0.17
  -8  -6   1    2.26    0.16
  -8   6  -1    2.45    0.21
  -8   6  -1    2.39    0.17
   0  -7  -1    6.21    0.43
   0  -7   1    6.47    0.43
   1  -7   1   20.11    1.29
  -1   7   1   20.57    1.29
  -1  -7  -1   20.48    1.29
   1  -7   1   18.58    1.30
  -1  -7   1   19.37    1.29
   1  -7  -1   19.37    1.29
   1  -7  -1   18.29    1.31
   1  -7  -1   17.03    1.60
   2  -7   1    0.71    0.06
  -2   7   1    0.81    0.06
   2  -7   1    0.76    0.11
  -2   7   1    0.66    0.07
  -2   7  -1    0.66    0.06
   2  -7  -1    0.79    0.10
  -2  -7   1    0.72    0.05
   2  -7  -1    0.71    0.06
   3  -7   1    3.17    0.25
  -3   7   1    3.54    0.32
  -3   7   1    3.79    0.25
  -3   7   1    3.38    0.24
   3   7  -1    3.67    0.26
   3   7  -1    3.40    0.24
  -3   7  -1    3.58    0.31
  -3   7  -1    3.32    0.24
   3   7   1    3.32    0.24
  -3   7  -1    3.16    0.24
  -3   7  -1    3.72    0.24
  -4   7   1    0.50    0.14
   4  -7   1    0.47    0.08
   4   7  -1    0.52    0.09
  -4   7   1    0.42    0.06
   4   7  -1    0.65    0.06
  -4   7   1    0.48    0.06
   4   7  -1    0.46    0.05
  -4   7  -1    0.55    0.06
  -4   7  -1    0.77    0.09
   4   7   1    0.56    0.05
  -4   7  -1    0.44    0.06
  -4   7  -1    0.54    0.13
  -5   7   1    7.40    0.53
   5   7  -1    7.64    0.54
  -5   7   1    7.89    0.53
   5  -7   1    7.50    0.54
  -5  -7  -1    7.24    0.53
   5   7  -1    8.15    0.53
  -5   7   1    8.04    0.62
   5  -7  -1    7.96    0.54
  -5   7  -1    7.86    0.53
  -5   7  -1    8.46    0.62
  -5  -7   1    7.28    0.53
   5   7   1    7.76    0.53
   6  -7   1    3.05    0.23
   6  -7   1    3.27    0.24
  -6  -7  -1    2.94    0.22
   6   7  -1    3.39    0.22
  -6   7   1    3.34    0.31
   6  -7   1    2.97    0.23
   6  -7  -1    3.13    0.23
  -6   7  -1    3.27    0.31
   6   7   1    3.18    0.22
   6  -7  -1    2.99    0.23
   7  -7   1    3.67    0.24
   7  -7   1    3.18    0.23
   7  -7   1    3.34    0.23
  -7   7   1    3.28    0.29
   7   7  -1    3.46    0.23
  -7  -7  -1    3.19    0.22
   7  -7  -1    3.17    0.23
  -7  -7   1    3.11    0.22
   7  -7  -1    3.19    0.23
  -7   7  -1    3.43    0.29
   7  -7  -1    2.89    0.23
  -8   7   1    3.00    0.24
  -8  -7  -1    2.65    0.20
  -8   7   1    3.39    0.21
  -8   7  -1    3.25    0.30
  -8  -7   1    2.72    0.20
   0  -8   1    3.93    0.26
   0  -8  -1    3.85    0.26
   1  -8   1    2.90    0.21
  -1  -8  -1    3.28    0.21
  -1   8   1    3.01    0.21
   1  -8   1    3.07    0.22
  -1  -8   1    3.20    0.21
   1  -8  -1    2.81    0.22
   1  -8  -1    2.88    0.21
  -2   8   1    1.45    0.12
   2   8  -1    1.65    0.12
  -2   8   1    1.66    0.12
  -2   8   1    1.91    0.23
  -2   8  -1    1.59    0.12
   2   8   1    1.39    0.12
  -2   8  -1    1.53    0.12
  -2   8  -1    1.55    0.12
   3  -8   1    6.21    0.47
   3   8  -1    7.20    0.47
  -3   8   1    7.28    0.46
  -3   8   1    6.50    0.46
  -3   8   1    6.60    0.46
   3   8  -1    6.48    0.46
  -3   8   1    7.16    0.53
   3   8   1    6.11    0.45
  -3   8  -1    7.35    0.53
  -3   8  -1    7.20    0.46
  -3   8  -1    6.20    0.46
  -3   8  -1    6.23    0.46
   4   8  -1    3.95    0.27
  -4   8   1    3.80    0.27
  -4   8   1    3.73    0.27
  -4   8   1    4.15    0.36
   4   8  -1    3.84    0.29
   4  -8   1    3.55    0.28
   4   8   1    3.67    0.27
  -4   8  -1    3.81    0.27
   4  -8  -1    3.87    0.28
  -4   8  -1    3.72    0.27
  -4   8  -1    4.29    0.35
  -5   8   1    3.87    0.27
   5   8  -1    3.89    0.27
  -5   8   1    3.69    0.27
  -5  -8  -1    3.55    0.27
  -5   8   1    4.32    0.37
   5   8  -1    3.68    0.29
   5  -8   1    3.68    0.28
  -5   8  -1    3.88    0.27
   5   8   1    3.80    0.27
   5  -8  -1    4.00    0.28
  -5   8  -1    3.80    0.27
  -5   8  -1    4.37    0.36
  -6   8   1    1.56    0.11
  -6  -8  -1    1.36    0.10
   6  -8   1    1.35    0.12
   6  -8  -1    1.34    0.12
  -6  -8   1    1.33    0.10
   6   8   1    1.33    0.11
   7   8  -1    0.12    0.02
   7  -8   1    0.09    0.03
  -7  -8  -1    0.12    0.02
   7  -8   1    0.09    0.03
  -7   8   1    0.13    0.07
  -7   8  -1    0.12    0.07
  -7  -8   1    0.07    0.02
   7  -8  -1    0.10    0.03
   7  -8  -1    0.08    0.03
   0   9  -1    0.03    0.02
   0   9   1    0.03    0.02
   0  -9   1    0.02    0.02
   0   9  -1    0.04    0.04
   0   9   1    0.03    0.02
   0   9  -1    0.04    0.02
   0  -9  -1    0.02    0.02
   1   9  -1   12.94    0.93
  -1   9   1   13.96    0.93
  -1   9   1   13.55    0.93
  -1   9   1   13.77    0.93
   1   9  -1   13.62    0.93
   1   9  -1   15.65    0.93
  -1  -9  -1   14.35    0.92
   1   9   1   12.40    0.93
   1  -9  -1   13.12    0.93
  -1   9  -1   13.54    0.93
  -1   9  -1   13.69    0.93
   1   9   1   14.93    0.93
  -1  -9   1   13.51    0.92
  -1   9  -1   13.75    0.93
   2   9  -1    4.85    0.33
   2   9  -1    4.27    0.33
  -2   9   1    4.95    0.33
  -2   9   1    4.84    0.33
  -2   9   1    4.86    0.33
   2   9   1    4.40    0.33
   2   9   1    4.48    0.33
  -2   9  -1    5.25    0.33
  -2   9  -1    4.86    0.33
  -2   9  -1    4.77    0.33
  -3   9   1    1.40    0.11
   3   9  -1    1.26    0.12
  -3   9   1    1.29    0.11
  -3   9   1    1.63    0.20
   3   9  -1    1.48    0.14
   3  -9   1    1.18    0.13
  -3   9   1    1.52    0.11
  -3   9  -1    1.36    0.11
   3   9   1    1.16    0.10
  -3   9  -1    1.51    0.11
  -4   9   1    0.53    0.15
  -4   9   1    0.43    0.06
   4   9  -1    0.45    0.07
  -4   9   1    0.49    0.06
  -4   9   1    0.42    0.06
   4  -9   1    0.40    0.07
   4   9  -1    0.50    0.05
  -4   9  -1    0.54    0.14
   4  -9  -1    0.44    0.07
   4   9   1    0.45    0.05
  -4   9  -1    0.53    0.07
  -4   9  -1    0.46    0.05
  -4   9  -1    0.45    0.06
   5  -9   1    3.33    0.26
  -5   9   1    4.28    0.35
  -5   9   1    3.59    0.26
   5   9  -1    3.63    0.25
  -5   9   1    3.66    0.26
  -5   9  -1    3.73    0.26
  -5   9  -1    3.65    0.26
   5   9   1    3.60    0.25
   5  -9  -1    3.46    0.27
   6  -9   1    2.16    0.17
   6   9  -1    2.34    0.16
   6  -9   1    2.08    0.17
  -6   9   1    2.64    0.25
  -6  -9  -1    2.12    0.16
   6   9   1    2.24    0.16
  -6   9  -1    2.69    0.24
   6  -9  -1    2.24    0.18
  -6  -9   1    2.34    0.16
  -7   9   1    0.42    0.10
   7  -9   1    0.26    0.08
   7  -9   1    0.31    0.04
  -7  -9  -1    0.29    0.04
  -7  -9   1    0.29    0.04
  -7   9  -1    0.41    0.04
  -7   9  -1    0.44    0.10
   7  -9  -1    0.35    0.05
   0  10   1    2.29    0.16
   0  10   1    2.05    0.16
   0  10  -1    2.10    0.16
   0  10   1    2.34    0.16
   0  10  -1    2.22    0.16
   0  10  -1    2.17    0.16
   0 -10  -1    2.20    0.16
  -1  10   1   12.75    0.84
   1  10  -1   12.05    0.84
   1  10  -1   11.96    0.84
  -1  10   1   12.45    0.84
   1  10  -1   14.04    0.84
  -1  10   1   12.33    0.84
  -1  10  -1   12.11    0.84
   1  10   1   13.87    0.85
   1  10   1   11.41    0.84
  -1  10  -1   11.78    0.84
  -1  10  -1   12.89    0.84
   2  10  -1   10.33    0.73
   2  10  -1   11.77    0.73
  -2  10   1   11.85    0.74
  -2  10   1   11.56    0.74
   2  10   1   10.67    0.73
  -2  10  -1    9.60    0.74
   2  10   1   10.03    0.73
  -2  10  -1   10.49    0.74
  -2  10  -1   11.65    0.74
   3 -10   1    5.11    0.41
   3  10  -1    5.82    0.40
  -3  10   1    5.71    0.40
   3  10  -1    6.39    0.42
  -3  10   1    6.68    0.40
  -3  10   1    5.68    0.40
  -3  10  -1    5.93    0.40
   3  10   1    5.17    0.40
  -3  10  -1    6.42    0.40
  -3  10  -1    5.55    0.40
   4  10  -1    7.66    0.54
  -4  10   1    9.20    0.54
  -4  10   1    7.84    0.54
  -4  10   1    7.59    0.54
   4  10   1    7.29    0.54
   4 -10  -1    7.42    0.55
  -4  10  -1    7.71    0.54
  -4  10  -1    9.33    0.54
  -4  10  -1    7.65    0.54
  -5  10   1    9.38    0.63
   5  10  -1    7.70    0.54
  -5  10   1    7.76    0.54
   5 -10  -1    7.22    0.55
   5  10   1    7.53    0.54
   6 -10   1    2.48    0.19
  -6  10   1    3.16    0.26
   6  10  -1    2.80    0.19
  -6 -10  -1    2.74    0.19
   6 -10   1    2.50    0.20
  -6  10  -1    3.20    0.26
   6  10   1    2.77    0.19
  -6 -10   1    2.66    0.19
   6 -10  -1    2.46    0.20
   7 -10   1    0.20    0.04
  -7 -10  -1    0.22    0.03
  -7  10   1    0.17    0.07
  -7  10   1    0.20    0.04
  -7  10  -1    0.24    0.04
  -7 -10   1    0.29    0.03
  -7  10  -1    0.21    0.09
   7 -10  -1    0.16    0.03
   0  11   1    8.59    0.61
   0  11   1    9.33    0.61
  -1  11   1   15.19    1.05
   1  11  -1   14.59    1.05
  -1  11   1   15.16    1.05
  -1  11   1   15.53    1.05
   1  11  -1   16.93    1.05
   1  11   1   17.72    1.05
   1  11   1   14.73    1.06
  -1  11  -1   15.33    1.05
  -1  11  -1   15.56    1.05
  -2  11   1    2.73    0.18
   2  11  -1    2.38    0.18
  -2  11   1    2.58    0.18
  -2  11   1    2.52    0.18
   2  11  -1    2.39    0.18
  -2  11  -1    2.55    0.18
  -2  11  -1    2.75    0.18
   2  11   1    2.28    0.18
  -2  11  -1    2.61    0.18
   2  11   1    2.19    0.18
  -3  11   1    5.28    0.37
  -3  11   1    5.12    0.37
   3  11  -1    5.31    0.38
  -3  11   1    5.77    0.37
   3  11  -1    5.21    0.37
  -3  11  -1    5.82    0.37
  -3  11  -1    5.38    0.37
   3  11   1    4.75    0.36
  -3  11  -1    5.48    0.37
  -4  11   1    6.83    0.47
   4  11  -1    6.36    0.47
  -4  11   1    6.71    0.47
  -4  11   1    8.03    0.47
  -4  11  -1    6.90    0.47
   4 -11  -1    6.26    0.48
  -4  11  -1    6.50    0.47
   4  11   1    6.23    0.47
  -4  11  -1    8.04    0.47
   5 -11   1    0.17    0.04
  -5  11   1    0.22    0.04
   5  11  -1    0.19    0.03
  -5  11   1    0.26    0.04
   5 -11  -1    0.19    0.04
  -5  11  -1    0.29    0.04
   5  11   1    0.18    0.03
  -6  11   1    0.96    0.14
   6 -11   1    0.72    0.07
  -6 -11  -1    0.87    0.07
   6  11  -1    0.77    0.06
   6 -11  -1    0.70    0.07
   6  11   1    0.84    0.06
   6 -11  -1    0.67    0.08
  -6 -11   1    0.82    0.07
  -6  11  -1    0.99    0.13
  -6  11  -1    0.96    0.07
  -7  11   1    2.11    0.16
  -7  11  -1    2.19    0.16
  -7  11  -1    2.51    0.24
   0  12  -1    8.48    0.60
   0  12  -1    9.12    0.60
   0  12   1    8.46    0.60
   0  12   1    9.28    0.60
  -1  12   1    9.51    0.65
  -1  12   1    9.65    0.65
   1  12  -1    8.38    0.64
  -1  12   1    9.96    0.65
   1  12  -1    9.00    0.64
   1  12  -1   10.89    0.65
   1  12   1    8.76    0.64
   1  12   1   10.56    0.65
  -1  12  -1    9.35    0.65
  -1  12  -1    9.27    0.65
   2  12  -1    1.75    0.15
  -2  12   1    1.57    0.12
   2  12  -1    1.36    0.12
  -2  12   1    1.54    0.12
   2  12  -1    1.87    0.13
   2  12  -1    1.36    0.12
  -2  12   1    1.62    0.12
   2  12   1    1.42    0.12
  -2  12  -1    1.64    0.12
  -2  12  -1    1.56    0.12
  -3  12   1   29.83    2.02
  -3  12   1   30.50    2.02
  -3  12   1   31.65    2.02
   3 -12  -1   26.84    2.02
  -3  12  -1   31.72    2.02
  -3  12  -1   29.72    2.02
  -4  12   1    0.80    0.08
  -4  12   1    1.02    0.08
   4  12  -1    0.71    0.07
  -4  12   1    0.83    0.08
  -4  12  -1    1.03    0.08
  -4  12  -1    0.78    0.08
  -4  12  -1    1.05    0.17
   5  12  -1    2.80    0.22
  -5  12   1    3.62    0.23
  -5  12   1    3.56    0.29
  -5  12   1    2.94    0.22
  -5  12  -1    3.69    0.29
  -5  12  -1    3.03    0.22
   5  12   1    2.75    0.22
   6  12  -1    1.18    0.09
  -6  12   1    1.24    0.16
  -6  12   1    1.46    0.10
   6 -12   1    1.12    0.09
   6 -12  -1    1.17    0.10
  -6  12  -1    1.33    0.15
  -6  12  -1    1.39    0.10
   0  13  -1    2.72    0.21
   0  13   1    3.28    0.23
   0  13  -1    3.01    0.21
   0  13  -1    3.47    0.23
   0  13   1    3.15    0.22
   0  13   1    2.70    0.21
  -1  13   1    0.82    0.08
   1  13  -1    0.60    0.06
   1  13  -1    0.63    0.07
  -1  13   1    0.64    0.06
  -1  13   1    0.69    0.06
   1  13  -1    0.85    0.09
   1  13   1    0.69    0.07
  -1  13  -1    0.78    0.07
  -1  13  -1    0.57    0.06
  -1  13  -1    0.58    0.06
   1  13   1    0.55    0.06
   2  13  -1    2.23    0.19
  -2  13   1    2.22    0.17
   2  13  -1    2.63    0.17
   2  13  -1    2.07    0.17
  -2  13   1    2.42    0.17
  -2  13   1    2.34    0.17
  -2  13  -1    2.46    0.25
  -2  13  -1    2.39    0.17
   2  13   1    2.07    0.17
  -2  13  -1    2.32    0.17
  -3  13   1    4.35    0.30
  -3  13   1    4.38    0.30
  -3  13   1    4.69    0.30
   3  13  -1    3.84    0.30
  -3  13  -1    4.21    0.30
   3 -13  -1    3.76    0.34
  -3  13  -1    4.54    0.30
  -3  13  -1    5.04    0.38
  -4  13   1    0.45    0.05
   4  13  -1    0.34    0.04
  -4  13   1    0.43    0.14
  -4  13   1    0.35    0.05
  -4  13   1    0.33    0.04
  -4  13  -1    0.37    0.13
   4 -13  -1    0.25    0.05
  -4  13  -1    0.32    0.05
   4  13   1    0.30    0.04
  -4  13  -1    0.45    0.05
  -4  13  -1    0.33    0.05
  -5  13   1    4.41    0.28
  -5  13   1    4.19    0.32
  -5  13   1    3.86    0.27
   5  13  -1    3.54    0.27
   5  13   1    3.53    0.27
  -5  13  -1    3.75    0.27
  -5  13  -1    4.36    0.28
  -5  13  -1    4.20    0.32
   6 -13   1    1.92    0.14
  -6  13   1    2.13    0.14
  -6  13  -1    1.94    0.19
   6 -13  -1    1.92    0.14
  -6  13  -1    2.18    0.14
   0  14  -1    0.37    0.05
   0  14   1    0.38    0.05
   0  14  -1    0.49    0.07
   0  14   1    0.34    0.05
   0  14  -1    0.39    0.05
   1  14  -1    1.29    0.10
  -1  14   1    1.17    0.10
  -1  14   1    1.11    0.09
   1  14  -1    1.26    0.12
   1  14  -1    1.05    0.09
  -1  14   1    1.39    0.11
   1  14   1    1.10    0.09
  -1  14  -1    1.19    0.10
  -1  14  -1    1.40    0.10
  -1  14  -1    1.10    0.09
   1  14   1    1.24    0.10
  -2  14   1    1.97    0.14
  -2  14   1    1.76    0.14
  -2  14   1    1.84    0.14
  -2  14  -1    2.12    0.14
  -2  14  -1    1.85    0.14
   2  14   1    1.67    0.14
  -2  14  -1    1.78    0.14
  -3  14   1    0.39    0.05
  -3  14   1    0.34    0.05
  -3  14   1    0.38    0.06
   3  14  -1    0.27    0.04
  -3  14  -1    0.41    0.05
  -3  14  -1    0.40    0.05
  -3  14  -1    0.38    0.05
  -3  14  -1    0.39    0.14
  -4  14   1    0.50    0.05
  -4  14   1    0.40    0.05
  -4  14  -1    0.49    0.05
  -4  14  -1    0.48    0.05
  -4  14  -1    0.44    0.05
  -4  14  -1    0.49    0.13
   5  14  -1    0.35    0.04
   5 -14   1    0.31    0.04
  -5  14   1    0.43    0.05
  -5  14  -1    0.43    0.05
  -5  14  -1    0.42    0.04
  -5  14  -1    0.32    0.12
   0  15  -1   -0.01    0.04
   0  15  -1   -0.02    0.02
   0  15   1    0.01    0.02
  -1  15   1    1.79    0.13
   1  15  -1    1.57    0.12
   1  15  -1    1.37    0.12
   1  15   1    1.65    0.13
  -1  15  -1    1.44    0.13
  -1  15  -1    1.81    0.14
  -2  15   1    2.57    0.19
  -2  15   1    2.68    0.19
  -2  15   1    2.82    0.19
   2  15  -1    2.45    0.19
  -2  15  -1    2.67    0.19
  -2  15  -1    2.82    0.19
  -2  15  -1    2.83    0.19
   2  15   1    2.43    0.19
  -3  15   1    7.60    0.53
  -3  15   1    7.53    0.53
  -3  15   1    8.03    0.53
  -3  15  -1    7.93    0.53
  -3  15  -1    7.96    0.53
  -3  15  -1    7.79    0.53
  -4  15   1    3.76    0.26
  -4  15   1    3.55    0.26
  -4  15   1    3.76    0.25
  -4  15  -1    3.70    0.25
  -4  15  -1    3.71    0.26
  -4  15  -1    3.69    0.26
   5 -15   1    6.74    0.46
  -5  15  -1    7.08    0.46
   5 -15  -1    6.71    0.46
   0  16  -1    4.74    0.37
   0  16   1    5.76    0.36
   0  16  -1    5.30    0.36
   0  16   1    5.08    0.36
   0  16  -1    5.54    0.36
   1  16  -1    0.94    0.08
  -1  16   1    0.99    0.08
   1  16  -1    1.05    0.08
  -1  16   1    0.96    0.08
  -1  16  -1    0.98    0.08
   1  16   1    1.07    0.09
  -1  16  -1    0.92    0.08
   1  16   1    0.88    0.08
  -1  16  -1    0.84    0.09
  -2  16   1    0.68    0.06
  -2  16   1    0.72    0.06
   2  16   1    0.60    0.07
  -2  16  -1    0.57    0.06
  -2  16  -1    0.67    0.06
  -2  16  -1    0.73    0.06
  -3  16   1    6.39    0.41
  -3  16   1    5.16    0.41
  -3  16   1    6.34    0.41
  -3  16  -1    6.35    0.41
  -3  16  -1    5.63    0.41
  -3  16  -1    6.22    0.41
   4 -16   1    1.89    0.15
  -4  16   1    2.34    0.15
  -4  16  -1    1.94    0.15
  -4  16  -1    2.30    0.15
   0  17   1    4.77    0.31
   0  17  -1    4.49    0.31
   0  17   1    4.50    0.31
   0  17  -1    4.65    0.31
  -1  17   1    3.34    0.22
  -1  17   1    3.14    0.22
   1  17  -1    3.22    0.22
   1  17  -1    3.07    0.22
   1  17   1    3.24    0.22
  -1  17  -1    3.17    0.22
  -1  17  -1    3.20    0.22
  -2  17   1    0.43    0.04
  -2  17   1    0.38    0.04
  -2  17  -1    0.25    0.06
  -2  17  -1    0.38    0.04
  -2  17  -1    0.39    0.04
  -3  17   1    5.08    0.34
  -3  17   1    5.01    0.34
  -3  17  -1    4.87    0.34
  -3  17  -1    4.90    0.34
   0  18   1    0.72    0.06
   0  18  -1    0.71    0.06
   0  18  -1    0.68    0.06
  -1  18   1    0.66    0.06
  -1  18   1    0.64    0.05
  -1  18  -1    0.69    0.06
   1  18   1    0.64    0.07
  -1  18  -1    0.67    0.05
  -2  18   1    0.81    0.06
  -2  18   1    0.76    0.06
  -2  18  -1    0.72    0.06
  -2  18  -1    0.75    0.06
   0   0  -2  210.57   13.88
   0   0   2  202.32   13.88
  -1   0   2    0.03    0.01
  -1   0  -2   -0.02    0.12
  -1   0  -2    0.01    0.02
  -1   0   2   -0.02    0.12
   1   0   2    0.00    0.02
   1   0  -2    0.11    0.14
   1   0   2    0.02    0.13
   2   0  -2   32.07    2.10
   2   0   2   28.76    2.10
   2   0  -2   33.99    2.37
  -2   0  -2   26.74    2.10
   2   0  -2   34.92    2.09
   2   0   2   30.24    2.09
  -2   0   2   33.68    2.09
  -2   0  -2   29.83    2.32
  -2   0  -2   29.02    2.27
  -2   0   2   33.06    2.29
  -3   0  -2   12.03    1.37
  -3   0  -2   12.04    0.95
   3   0   2   14.93    0.92
   3   0  -2   15.06    1.59
  -3   0  -2   11.14    1.43
   3   0  -2   14.42    0.94
   3   0   2   13.73    0.94
  -3   0   2   12.46    1.36
  -3   0   2   15.38    0.92
  -4   0   2    0.63    0.06
   4   0  -2    0.59    0.08
  -4   0  -2    0.57    0.11
   4   0   2    0.69    0.06
   4   0  -2    0.65    0.08
   4   0  -2    0.74    0.06
   4   0   2    0.64    0.07
  -4   0   2    0.71    0.06
   4   0   2    0.60    0.07
   4   0   2    0.66    0.06
  -4   0  -2    0.58    0.05
   4   0  -2    0.55    0.06
   5   0   2    3.14    0.26
  -5   0   2    3.00    0.37
  -5   0  -2    3.10    0.31
  -5   0   2    3.40    0.24
   5   0   2    3.99    0.24
   6   0   2    2.99    0.21
   6   0  -2    2.71    0.21
   6   0  -2    3.03    0.22
  -6   0  -2    2.86    0.20
   6   0   2    3.24    0.21
   6   0   2    2.78    0.20
  -6   0  -2    2.54    0.28
  -6   0   2    2.90    0.20
  -6   0   2    2.43    0.29
   6   0  -2    3.27    0.20
  -7   0  -2    0.76    0.17
   7   0   2    0.73    0.08
  -7   0   2    0.79    0.07
  -7   0  -2    0.82    0.06
  -7   0   2    0.69    0.17
  -8   0   2    0.31    0.15
   8   0   2    0.47    0.05
   8   0   2    0.53    0.06
   8   0  -2    0.46    0.05
   8   0  -2    0.35    0.05
   0   1  -2   46.81    3.22
   0   1   2   50.09    3.25
   0  -1  -2   42.09    3.23
  -1   1   2  217.84   13.47
  -1  -1  -2  226.84   13.46
   1   1  -2  208.05   13.46
  -1   1  -2  175.14   13.43
   1  -1  -2  204.79   13.49
   1   1   2  180.88   13.44
  -1   1  -2  184.73   13.46
  -2  -1  -2   10.69    0.96
  -2  -1  -2   10.30    0.75
  -2   1   2   11.15    0.99
   2  -1   2   11.16    0.74
   2   1  -2   11.49    0.75
  -2   1   2   12.45    0.74
  -2  -1  -2    9.86    1.03
   2  -1   2   10.31    0.75
  -2   1  -2    9.61    0.96
  -2   1  -2    9.88    1.00
   2  -1  -2   12.18    0.76
   2  -1  -2   12.11    0.74
   2  -1  -2   11.53    1.08
  -2   1  -2    9.72    0.75
  -2  -1   2   11.48    0.97
   2   1   2   11.47    0.74
   2   1   2   11.44    0.75
  -3  -1  -2    1.35    0.61
   3  -1   2    1.16    0.08
  -3  -1  -2    0.98    0.10
   3   1  -2    0.46    0.54
  -3  -1  -2    0.72    0.47
  -3   1   2    0.96    0.54
   3  -1   2    0.99    0.10
   3   1  -2    1.02    0.11
  -3  -1   2    0.94    0.53
   3  -1  -2    1.76    0.72
   3   1   2    1.04    0.10
  -3   1  -2    0.47    0.52
   3  -1  -2    1.15    0.11
  -3  -1   2    1.19    0.08
   3  -1  -2    1.23    0.08
  -3   1  -2    0.75    0.52
   4  -1   2   23.99    1.66
  -4   1   2   21.38    1.72
   4   1  -2   27.87    1.66
   4   1  -2   22.27    1.66
  -4   1   2   26.37    1.66
   4  -1   2   24.41    1.69
   4   1  -2   25.46    1.67
   4  -1   2   22.82    1.66
  -4  -1  -2   24.33    1.65
   4  -1   2   23.78    1.66
   4   1  -2   25.10    1.67
  -4   1   2   25.02    1.66
  -4  -1  -2   21.89    1.69
   4  -1  -2   26.12    1.67
  -4   1  -2   25.58    1.65
   4   1   2   24.56    1.66
  -4  -1   2   25.08    1.66
   4  -1  -2   28.58    1.66
  -4  -1   2   26.79    1.66
   4  -1  -2   22.58    1.66
   4   1   2   25.83    1.66
  -4   1  -2   22.27    1.69
   4  -1  -2   28.22    1.73
   4   1   2   22.95    1.66
  -4   1  -2   21.81    1.71
   4   1   2   27.25    1.66
   5   1  -2    3.64    0.26
  -5   1   2    3.72    0.26
  -5  -1  -2    3.20    0.34
  -5  -1  -2    3.63    0.26
   5  -1   2    4.11    0.26
   5   1  -2    4.16    0.26
   5   1   2    3.99    0.26
  -5   1  -2    3.78    0.26
   5   1   2    3.97    0.26
   5   1   2    3.78    0.26
   5  -1  -2    3.52    0.27
  -5  -1   2    3.17    0.35
  -5   1  -2    3.32    0.33
   5  -1  -2    4.12    0.28
   5   1   2    3.98    0.27
   6  -1   2    4.88    0.34
   6   1  -2    5.20    0.35
  -6  -1  -2    4.34    0.42
  -6  -1  -2    4.96    0.34
  -6   1   2    4.32    0.43
   6  -1   2    4.94    0.35
  -6   1   2    5.02    0.34
   6  -1   2    5.50    0.34
   6   1  -2    4.76    0.34
   6   1  -2    5.63    0.34
  -6   1  -2    5.26    0.34
  -6  -1   2    4.22    0.43
   6  -1  -2    4.44    0.34
  -6   1  -2    4.37    0.41
  -6  -1   2    4.95    0.34
   6   1   2    5.37    0.34
   6   1   2    5.05    0.34
   6  -1  -2    5.22    0.35
   6   1   2    5.39    0.35
  -7   1   2    1.27    0.08
   7  -1   2    1.21    0.10
   7  -1   2    1.18    0.13
   7   1  -2    1.21    0.12
  -7   1   2    1.03    0.19
  -7  -1  -2    0.91    0.20
   7  -1   2    1.26    0.10
  -7  -1  -2    1.17    0.09
  -7  -1   2    0.95    0.19
  -7   1  -2    1.05    0.18
   7   1   2    1.07    0.10
   7  -1  -2    0.92    0.10
  -7   1  -2    1.19    0.08
   8   1  -2    1.67    0.12
   8  -1   2    1.73    0.12
   8   1  -2    1.44    0.11
   8  -1   2    1.72    0.12
   8  -1  -2    1.53    0.12
   8  -1  -2    1.40    0.12
   0   2  -2    4.81    0.31
   0  -2   2    5.31    0.42
   0  -2  -2    4.34    0.31
   0   2   2    4.26    0.31
   1  -2   2   21.83    1.71
   1   2  -2   28.50    1.83
   1  -2   2   24.24    1.71
   1   2  -2   28.24    1.72
  -1  -2  -2   27.67    1.72
   1   2   2   27.80    1.84
  -1   2  -2   24.23    1.82
  -1   2  -2   22.11    1.84
   1  -2  -2   27.84    1.90
   1  -2  -2   23.31    1.71
   2   2  -2    6.55    0.43
  -2  -2  -2    5.59    0.42
   2  -2   2    6.38    0.41
  -2  -2  -2    7.51    0.97
  -2   2   2    5.92    0.71
  -2   2   2    6.66    0.41
   2   2  -2    6.19    0.71
   2  -2   2    5.85    0.42
  -2  -2  -2    5.98    0.71
  -2   2  -2    4.87    0.69
   2  -2  -2    6.59    0.41
   2  -2  -2    5.92    0.85
   2   2   2    6.76    0.42
   2  -2  -2    6.66    0.43
  -2  -2   2    6.17    0.65
  -2   2  -2    5.05    0.71
  -2   2  -2    5.36    0.43
   3  -2   2   12.60    0.79
   3  -2   2   11.39    0.81
  -3   2   2   10.03    1.29
  -3  -2  -2    9.20    1.30
  -3  -2  -2   10.66    0.80
  -3  -2  -2   11.28    1.30
   3   2  -2   10.85    1.39
  -3   2   2   12.63    0.79
  -3   2  -2   10.48    1.41
   3  -2  -2   12.35    0.82
  -3  -2   2   13.31    0.79
   3  -2  -2   11.90    1.64
   3   2   2   12.34    0.80
  -3  -2   2   10.78    1.22
  -3   2  -2   10.75    0.81
   3  -2  -2   13.10    0.79
   4  -2   2   12.63    0.91
   4   2  -2   14.14    0.86
  -4   2   2   13.29    0.86
   4   2  -2   13.19    0.87
   4   2  -2   11.84    0.86
  -4  -2  -2   11.09    0.89
  -4  -2  -2   12.56    0.86
   4  -2   2   13.94    0.86
   4   2  -2   12.93    0.87
  -4   2   2   13.80    0.86
   4  -2   2   11.98    0.86
   4  -2   2   12.17    0.87
  -4   2   2   11.28    0.93
  -4  -2   2   12.86    0.86
   4  -2  -2   11.71    0.87
  -4   2  -2   11.62    0.90
   4  -2  -2   13.91    0.86
  -4   2  -2   13.80    0.86
   4   2   2   13.72    0.86
   4   2   2   13.95    0.86
   4   2   2   13.56    0.87
   4   2   2   12.25    0.86
   4  -2  -2   12.79    0.92
  -4   2  -2   11.69    0.92
   4  -2  -2   13.74    0.87
  -5  -2  -2   28.81    2.05
   5   2  -2   31.51    2.06
   5  -2   2   28.75    2.06
   5   2  -2   33.02    2.05
  -5   2   2   26.48    2.12
  -5   2   2   29.87    2.05
  -5   2   2   30.88    2.05
   5   2  -2   28.39    2.05
   5  -2  -2   32.70    2.06
   5   2   2   29.92    2.05
  -5  -2   2   27.80    2.05
  -5   2  -2   32.64    2.05
   5   2   2   34.09    2.05
   5   2   2   32.26    2.05
   5   2   2   31.85    2.06
   5  -2  -2   30.19    2.07
   6  -2   2    3.61    0.26
  -6   2   2    3.25    0.35
   6  -2   2    3.72    0.27
   6   2  -2    4.02    0.27
   6   2  -2    4.09    0.26
  -6  -2  -2    3.64    0.26
  -6   2   2    3.89    0.26
  -6  -2  -2    3.15    0.35
   6  -2   2    4.10    0.27
   6   2  -2    3.81    0.26
   6   2   2    3.89    0.26
   6  -2  -2    3.75    0.28
  -6  -2   2    3.75    0.26
   6   2   2    4.05    0.27
   6   2   2    3.93    0.26
   6  -2  -2    3.34    0.26
  -6   2  -2    3.42    0.34
  -6   2  -2    4.15    0.26
   6  -2  -2    3.73    0.27
   7  -2   2    1.20    0.10
   7   2  -2    1.32    0.10
   7   2  -2    1.10    0.09
  -7   2   2    0.95    0.18
   7  -2   2    1.21    0.10
  -7  -2  -2    1.08    0.08
   7  -2   2    1.14    0.10
  -7   2   2    1.20    0.09
  -7   2  -2    1.01    0.17
  -7  -2   2    1.07    0.09
  -7   2  -2    1.23    0.08
   7   2   2    1.29    0.10
   7  -2  -2    1.04    0.10
   7  -2  -2    1.18    0.10
   8   2  -2    2.80    0.17
  -8   2   2    2.04    0.23
   8  -2   2    2.84    0.17
  -8  -2   2    2.17    0.16
  -8   2  -2    2.04    0.25
   8  -2  -2    2.40    0.17
   8  -2  -2    2.34    0.17
   0  -3  -2   87.70    5.98
   1   3  -2   64.32    4.35
   1  -3  -2   64.47    4.46
  -1   3  -2   57.99    4.38
   1   3   2   68.85    4.40
   2  -3   2    2.32    0.15
  -2  -3  -2    2.04    0.16
   2  -3   2    2.06    0.16
   2   3  -2    2.08    0.16
  -2   3   2    2.38    0.15
   2   3  -2    1.86    0.47
  -2   3   2    2.20    0.56
  -2  -3  -2    2.75    0.49
  -2  -3   2    2.37    0.44
   2  -3  -2    2.92    0.62
   2  -3  -2    2.28    0.15
  -2   3  -2    1.60    0.39
  -2   3  -2    1.97    0.16
   2  -3  -2    2.45    0.17
   3  -3   2    3.87    0.30
   3   3  -2    3.91    0.29
  -3  -3  -2    3.47    0.29
  -3   3   2    4.23    1.07
   3  -3   2    4.20    0.28
  -3   3   2    4.04    0.28
   3  -3  -2    4.33    0.32
   3  -3  -2    5.18    1.14
   3   3   2    4.22    0.29
  -3   3  -2    3.65    0.30
  -3  -3   2    4.70    0.27
  -3   3  -2    3.37    0.84
   3  -3  -2    4.22    0.28
   4  -3   2    9.79    0.74
  -4  -3  -2    9.96    0.73
  -4   3   2   10.61    0.73
   4   3  -2   11.26    0.74
   4   3  -2   11.21    0.74
  -4   3   2    9.79    0.80
   4  -3   2   10.33    0.74
  -4   3   2   11.38    0.73
   4  -3   2   11.21    0.73
   4   3  -2   12.10    0.73
   4  -3   2   10.47    0.78
   4   3  -2    9.60    0.73
  -4   3  -2   12.19    0.73
   4  -3  -2   11.77    0.75
   4  -3  -2   10.99    0.80
   4   3   2   12.41    0.74
   4   3   2   11.05    0.73
   4   3   2   11.96    0.73
  -4  -3   2   10.54    0.73
  -4   3  -2    9.82    0.79
   4   3   2   10.70    0.73
   4  -3  -2   11.24    0.73
   4  -3  -2    9.58    0.74
  -5  -3  -2   15.90    1.12
   5   3  -2   17.65    1.13
   5   3  -2   15.41    1.12
   5   3  -2   16.40    1.13
   5  -3   2   15.98    1.13
   5   3  -2   17.70    1.12
  -5   3   2   14.64    1.20
  -5   3   2   17.45    1.12
   5  -3   2   16.28    1.13
  -5   3   2   16.29    1.12
   5  -3   2   16.80    1.13
   5   3   2   18.47    1.13
  -5   3  -2   15.25    1.19
   5   3   2   17.01    1.12
   5   3   2   16.98    1.12
   5   3   2   18.76    1.12
   5  -3  -2   14.65    1.13
   5  -3  -2   17.46    1.14
  -5  -3   2   15.88    1.12
  -5   3  -2   18.99    1.12
  -6   3   2    0.32    0.15
   6   3  -2    0.35    0.06
  -6   3   2    0.30    0.04
   6  -3   2    0.36    0.06
   6  -3   2    0.34    0.06
   6  -3   2    0.31    0.05
   6   3  -2    0.28    0.04
  -6  -3  -2    0.38    0.04
   6   3  -2    0.37    0.05
  -6  -3   2    0.30    0.04
   6   3   2    0.39    0.06
   6  -3  -2    0.35    0.05
   6  -3  -2    0.32    0.07
  -6   3  -2    0.35    0.04
   6   3   2    0.41    0.06
  -6   3  -2    0.32    0.13
   6   3   2    0.43    0.05
   6  -3  -2    0.30    0.04
  -6  -3   2    0.30    0.16
   6   3   2    0.38    0.04
   7  -3   2    1.38    0.11
   7   3  -2    1.46    0.10
   7   3  -2    1.55    0.10
   7  -3   2    1.39    0.11
  -7   3   2    1.18    0.19
   7  -3   2    1.36    0.11
   7   3  -2    1.59    0.11
  -7  -3  -2    1.32    0.10
  -7   3  -2    1.28    0.18
  -7  -3   2    1.20    0.21
   7  -3  -2    1.28    0.12
   7  -3  -2    1.24    0.11
  -7  -3   2    1.33    0.10
  -8   3   2    4.62    0.38
  -8  -3  -2    4.65    0.32
   8  -3  -2    4.96    0.33
  -8   3  -2    4.63    0.37
  -8  -3   2    4.68    0.32
   8  -3  -2    5.02    0.33
   1  -4   2   11.60    0.84
  -1  -4  -2   14.24    0.84
   1   4  -2   11.55    0.89
  -1   4   2   12.73    0.83
   1  -4   2   12.48    0.83
  -1   4  -2   10.61    1.00
   1   4   2   12.61    0.98
   1  -4  -2   12.52    1.08
   1  -4  -2   12.01    0.83
  -1   4  -2   11.58    0.99
   1  -4  -2   13.63    0.85
   1   4   2   12.63    0.83
   2   4  -2   15.12    1.20
  -2   4   2   16.33    1.35
   2   4  -2   15.14    1.01
  -2  -4  -2   13.78    1.25
   2  -4   2   14.82    1.02
  -2  -4  -2   13.17    1.02
   2  -4  -2   16.75    1.03
  -2   4  -2   14.18    1.31
   2  -4  -2   15.40    1.48
  -2   4  -2   14.30    1.02
   2  -4  -2   16.12    1.01
  -3   4   2   11.06    0.72
   3  -4   2   11.35    0.72
   3   4  -2   10.18    0.74
   3  -4   2   10.30    0.75
   3  -4  -2   10.77    0.72
  -3   4  -2   10.43    1.58
   3  -4  -2   10.90    0.76
  -4   4   2    1.32    0.19
  -4   4   2    1.29    0.11
   4   4  -2    1.24    0.11
  -4   4   2    1.56    0.10
   4  -4   2    1.32    0.12
   4  -4   2    1.41    0.12
   4   4  -2    1.53    0.11
   4   4  -2    1.52    0.12
   4   4  -2    1.43    0.13
   4  -4   2    1.37    0.13
  -4  -4  -2    1.38    0.11
   4   4   2    1.40    0.10
   4  -4  -2    1.58    0.13
  -4  -4   2    1.28    0.12
   4   4   2    1.60    0.12
   4   4   2    1.70    0.11
  -4   4  -2    1.43    0.11
   4   4   2    1.46    0.11
   4  -4  -2    1.36    0.12
  -4   4  -2    1.32    0.17
  -5   4   2   11.11    0.67
  -5   4   2    9.00    0.76
   5   4  -2   10.68    0.68
  -5   4   2    9.95    0.68
   5   4  -2    9.73    0.68
   5  -4   2    9.52    0.68
   5   4  -2   11.06    0.68
   5   4  -2   10.04    0.69
  -5  -4  -2    9.33    0.67
   5  -4   2    9.28    0.68
  -5   4  -2    9.40    0.68
   5   4   2   10.10    0.68
  -5   4  -2    9.41    0.75
   5   4   2   10.86    0.67
   5  -4  -2   10.60    0.69
  -5   4  -2   11.11    0.67
   5  -4  -2    8.86    0.68
  -5  -4   2    9.80    0.67
   6   4  -2    2.44    0.18
   6  -4   2    2.56    0.18
  -6  -4  -2    2.48    0.17
  -6   4   2    2.41    0.19
   6  -4   2    2.43    0.18
   6  -4   2    2.40    0.19
   6   4  -2    2.86    0.18
  -6   4   2    2.39    0.27
   6   4   2    2.60    0.18
   6  -4  -2    2.24    0.18
   6  -4  -2    2.39    0.18
  -6   4  -2    2.51    0.26
   6  -4  -2    2.64    0.20
  -6  -4   2    2.38    0.18
  -7  -4  -2    4.32    0.31
   7  -4   2    4.70    0.31
   7  -4   2    4.53    0.32
   7  -4   2    4.61    0.31
  -7   4   2    4.19    0.39
   7   4  -2    5.03    0.31
  -7   4  -2    4.44    0.38
  -7  -4   2    4.40    0.31
   7  -4  -2    4.27    0.31
   7  -4  -2    4.50    0.32
  -8   4   2    2.49    0.32
  -8  -4  -2    2.43    0.18
   8  -4   2    3.09    0.19
   8  -4  -2    2.49    0.19
   8  -4  -2    2.78    0.19
  -8  -4   2    2.46    0.18
  -8   4  -2    2.60    0.24
   0   5  -2    0.58    0.17
   0   5   2    0.35    0.28
   0  -5  -2    0.33    0.04
   0   5  -2    0.16    0.12
   0  -5  -2    0.18    0.21
  -1  -5  -2   43.46    2.56
   1  -5   2   35.74    2.56
   1  -5   2   38.60    2.55
  -1   5   2   38.25    2.55
   1  -5  -2   36.41    2.55
  -1   5  -2   34.21    2.71
  -1   5  -2   35.06    2.56
   1  -5  -2   41.26    2.56
   1   5   2   39.10    2.66
   1  -5  -2   38.91    2.79
  -2  -5  -2   43.69    3.09
   2  -5   2   46.10    3.09
   2  -5   2   48.67    3.08
  -2  -5  -2   42.17    3.26
   2  -5  -2   49.34    3.10
   2  -5  -2   47.77    3.53
  -2   5  -2   43.01    3.35
   2  -5  -2   48.01    3.08
  -2   5  -2   45.16    3.09
  -3   5   2    5.42    0.38
  -3   5   2    5.45    0.47
  -3  -5  -2    4.91    0.39
   3   5  -2    5.97    0.38
   3  -5   2    5.54    0.41
   3  -5   2    5.66    0.38
   3   5  -2    5.69    0.39
  -3   5   2    5.73    0.38
   3  -5  -2    5.57    0.38
   3  -5  -2    5.85    0.42
  -3   5  -2    5.32    0.43
   4   5  -2    0.33    0.05
   4  -5   2    0.43    0.07
  -4   5   2    0.33    0.13
  -4   5   2    0.37    0.05
   4   5  -2    0.39    0.05
   4  -5   2    0.52    0.09
  -4  -5  -2    0.55    0.06
   4   5  -2    0.54    0.06
   4   5  -2    0.42    0.08
   4   5   2    0.41    0.07
   4   5   2    0.43    0.04
   4   5   2    0.50    0.05
  -4   5  -2    0.48    0.06
  -4   5  -2    0.37    0.11
   4  -5  -2    0.31    0.06
   4  -5  -2    0.45    0.07
  -5  -5  -2    1.12    0.09
   5   5  -2    1.22    0.09
   5  -5   2    1.13    0.11
  -5   5   2    1.15    0.19
  -5   5   2    1.17    0.10
   5   5  -2    1.16    0.09
   5   5  -2    1.40    0.10
   5   5  -2    1.23    0.12
   5  -5   2    1.18    0.11
   5   5   2    1.13    0.09
   5  -5  -2    1.22    0.11
  -5   5  -2    1.13    0.10
  -5   5  -2    1.13    0.17
  -5  -5   2    1.05    0.23
   5   5   2    1.28    0.10
   5   5   2    1.40    0.09
  -5  -5   2    1.18    0.10
   6  -5   2   20.72    1.38
  -6   5   2   18.46    1.46
   6  -5   2   20.54    1.38
   6   5  -2   22.22    1.37
  -6   5   2   20.73    1.37
   6  -5   2   19.65    1.38
   6   5  -2   22.20    1.37
  -6  -5  -2   19.93    1.37
   6  -5  -2   21.15    1.39
   6  -5  -2   19.41    1.38
   6   5   2   22.24    1.37
  -6   5  -2   20.42    1.45
   6  -5  -2   18.51    1.38
  -6  -5   2   19.79    1.37
   7  -5   2    4.39    0.28
   7   5  -2    4.37    0.28
   7  -5   2    4.10    0.28
   7  -5   2    3.98    0.28
  -7  -5  -2    3.90    0.27
  -7   5   2    3.90    0.35
   7  -5  -2    4.05    0.29
  -7   5  -2    4.12    0.34
   7  -5  -2    3.71    0.28
   7  -5  -2    3.91    0.28
  -7  -5   2    3.96    0.28
   8  -5   2    2.45    0.15
  -8  -5  -2    1.88    0.14
  -8   5   2    1.95    0.20
  -8   5  -2    2.01    0.20
   8  -5  -2    2.26    0.15
  -8  -5   2    1.84    0.14
   8  -5  -2    1.84    0.15
   0  -6  -2   14.09    0.87
   0  -6  -2   12.48    0.86
   0   6   2   12.52    0.86
   0  -6   2   12.49    0.86
   0  -6  -2   12.18    1.04
   1  -6   2    9.73    0.67
   1  -6   2   10.29    0.66
  -1  -6  -2   10.73    0.66
   1  -6  -2    8.92    1.04
  -1  -6   2   10.06    0.66
   1  -6  -2    9.08    0.68
   1  -6  -2    9.72    0.66
  -1   6  -2    8.53    0.91
  -1   6  -2   10.65    0.67
   2  -6   2    9.44    0.65
  -2  -6  -2    8.45    0.64
  -2   6   2    9.77    0.63
   2  -6   2    9.38    0.63
   2  -6  -2    9.87    0.66
  -2  -6   2    9.87    0.63
   2  -6  -2    9.15    0.63
   3   6  -2   14.16    0.89
   3  -6   2   13.19    0.89
  -3  -6  -2   11.19    0.90
  -3   6   2   12.56    0.89
  -3   6   2   12.44    0.95
   3   6  -2   14.60    0.90
  -3   6  -2   12.63    0.89
  -3   6  -2   13.41    0.94
   3   6   2   12.62    0.89
  -3   6  -2   13.26    0.89
  -3   6  -2   15.06    0.89
  -4   6   2    0.71    0.07
   4  -6   2    0.67    0.08
   4   6  -2    0.64    0.06
   4   6  -2    0.76    0.06
  -4   6   2    0.71    0.15
   4   6  -2    0.82    0.10
  -4   6  -2    0.66    0.07
  -4   6  -2    0.66    0.08
  -4   6  -2    0.68    0.13
   4  -6  -2    0.76    0.09
   4   6   2    0.70    0.06
   4   6   2    0.68    0.08
  -4   6  -2    0.89    0.09
   5   6  -2   10.17    0.65
  -5   6   2    9.63    0.65
  -5  -6  -2    9.32    0.65
  -5   6   2    9.88    0.65
  -5   6   2    9.48    0.74
   5   6  -2   10.16    0.65
   5   6  -2    9.82    0.66
   5  -6   2    8.88    0.66
   5  -6   2    9.11    0.66
   5  -6  -2   10.53    0.67
  -5   6  -2   10.25    0.73
  -5   6  -2   10.29    0.65
   5  -6  -2    8.25    0.66
  -5  -6   2    9.18    0.65
   5   6   2    9.49    0.65
   6   6  -2    2.91    0.19
  -6   6   2    2.68    0.28
   6  -6   2    2.52    0.20
  -6   6   2    2.85    0.20
   6  -6   2    2.77    0.20
  -6  -6  -2    2.58    0.19
   6  -6   2    2.83    0.20
   6  -6  -2    2.76    0.21
  -6  -6   2    2.61    0.19
   6  -6  -2    2.53    0.20
  -6   6  -2    2.78    0.27
  -7  -6  -2    6.44    0.45
   7   6  -2    6.95    0.45
   7  -6   2    6.75    0.46
  -7   6   2    6.52    0.52
   7  -6   2    6.61    0.46
   7  -6   2    7.69    0.46
   7  -6  -2    5.99    0.46
  -7   6  -2    7.07    0.52
  -7  -6   2    6.57    0.45
   7  -6  -2    6.49    0.46
   7  -6  -2    6.49    0.46
  -8   6   2    0.49    0.11
  -8  -6  -2    0.48    0.04
   8  -6  -2    0.50    0.05
  -8  -6   2    0.45    0.04
  -8   6  -2    0.59    0.12
   0   7   2   47.41    3.05
   0  -7  -2   45.86    3.06
   0  -7  -2   42.43    3.19
   0  -7   2   46.45    3.05
  -1   7   2   24.74    1.63
  -1  -7  -2   26.00    1.63
   1  -7   2   24.92    1.63
   1  -7   2   25.05    1.64
  -1  -7   2   24.39    1.63
  -1   7  -2   24.34    1.95
   1  -7  -2   22.72    1.63
   1  -7  -2   23.04    1.65
   2   7  -2   20.89    1.32
  -2   7   2   18.35    1.32
   2  -7   2   19.41    1.31
  -2   7   2   19.21    1.32
   2  -7  -2   18.74    1.31
  -2   7  -2   19.66    1.32
  -2   7  -2   20.84    1.32
   2  -7  -2   19.56    1.34
  -2  -7   2   19.70    1.31
  -3   7   2    6.62    0.54
  -3   7   2    6.50    0.46
  -3   7   2    7.24    0.47
   3   7  -2    6.92    0.46
   3  -7   2    5.82    0.47
   3   7  -2    7.56    0.48
  -3   7  -2    7.52    0.47
   3   7   2    6.24    0.46
  -3   7  -2    7.32    0.53
   3   7   2    7.30    0.47
  -3   7  -2    6.65    0.46
  -3   7  -2    6.20    0.46
   4   7  -2    6.05    0.39
  -4   7   2    5.46    0.39
  -4   7   2    5.54    0.47
   4   7  -2    5.78    0.39
   4   7  -2    5.87    0.42
   4  -7   2    5.09    0.40
  -4   7  -2    6.65    0.39
  -4   7  -2    5.40    0.39
  -4   7  -2    5.91    0.46
   4   7   2    5.78    0.39
   4   7   2    5.33    0.39
   4  -7  -2    5.79    0.40
  -4   7  -2    5.44    0.39
  -5  -7  -2    4.82    0.35
  -5   7   2    5.10    0.36
   5  -7   2    4.68    0.36
  -5   7   2    5.26    0.36
  -5   7   2    5.34    0.45
   5   7  -2    5.52    0.36
   5   7  -2    5.12    0.37
  -5  -7   2    4.81    0.36
   5  -7  -2    5.32    0.37
  -5   7  -2    5.28    0.36
  -5   7  -2    5.57    0.44
   5   7   2    5.21    0.35
  -6   7   2    1.57    0.21
   6   7  -2    1.63    0.12
   6  -7   2    1.60    0.13
   6  -7   2    1.93    0.15
   6   7   2    1.56    0.12
   6  -7  -2    1.50    0.14
  -6   7  -2    1.73    0.21
   6  -7  -2    1.63    0.14
   7   7  -2    3.70    0.24
   7  -7   2    3.39    0.24
   7  -7   2    3.48    0.24
  -7   7   2    3.50    0.30
  -7  -7  -2    3.34    0.23
   7  -7  -2    3.04    0.24
  -7   7  -2    3.80    0.30
  -7  -7   2    3.36    0.24
   7  -7  -2    3.39    0.25
   7  -7  -2    3.44    0.25
  -8   7   2    0.40    0.11
  -8  -7  -2    0.39    0.03
  -8  -7   2    0.39    0.04
   0  -8  -2   21.23    1.79
   0   8   2   28.38    1.67
   0  -8  -2   24.45    1.66
   0  -8   2   24.98    1.66
   1  -8   2    7.64    0.51
  -1   8   2    7.59    0.51
  -1   8   2    7.74    0.51
  -1  -8  -2    8.38    0.51
   1  -8  -2    7.12    0.51
   1  -8  -2    6.98    0.53
  -1   8  -2    7.42    0.51
  -1   8  -2    7.74    0.51
  -1   8  -2    7.45    0.51
  -1  -8   2    7.71    0.51
   2   8  -2   10.12    0.66
  -2   8   2    9.69    0.66
   2   8  -2   11.51    0.67
  -2   8   2    9.29    0.66
   2   8   2    9.97    0.66
  -2   8  -2    8.96    0.66
  -2   8  -2    9.98    0.66
  -2   8  -2    9.60    0.66
  -2  -8   2    9.04    0.66
   3   8  -2    4.89    0.32
  -3   8   2    4.52    0.39
  -3   8   2    4.74    0.31
  -3   8   2    4.14    0.31
   3   8  -2    4.60    0.30
   3  -8   2    3.74    0.32
  -3   8  -2    4.38    0.30
  -3   8  -2    4.80    0.31
  -3   8  -2    4.14    0.30
   3   8   2    3.96    0.30
  -3   8  -2    4.93    0.37
   3   8   2    4.33    0.31
   4   8  -2   12.51    0.83
   4  -8   2   10.66    0.84
  -4   8   2   12.00    0.83
  -4   8   2   11.82    0.83
   4   8  -2   12.43    0.84
  -4   8   2   12.62    0.91
   4   8   2   11.20    0.83
  -4   8  -2   14.27    0.83
  -4   8  -2   11.81    0.83
  -4   8  -2   11.89    0.83
   4  -8  -2   12.68    0.84
  -4   8  -2   13.60    0.91
  -5   8   2    6.73    0.46
  -5   8   2    7.29    0.56
   5   8  -2    6.89    0.46
  -5  -8  -2    6.21    0.46
   5   8  -2    6.59    0.47
   5  -8   2    6.12    0.47
  -5   8   2    6.72    0.46
   5  -8  -2    6.79    0.48
   5   8   2    6.59    0.46
  -5   8  -2    7.73    0.55
  -6  -8  -2    6.10    0.42
   6  -8   2    5.66    0.43
  -6   8   2    6.38    0.43
  -6   8   2    6.65    0.52
   6   8  -2    6.45    0.43
   6  -8   2    5.85    0.43
  -6   8  -2    6.77    0.53
   6   8   2    6.24    0.42
   6  -8  -2    6.18    0.44
  -6  -8   2    6.00    0.42
  -7   8   2    0.04    0.07
   7   8  -2    0.03    0.02
   7  -8   2    0.08    0.02
   7  -8   2   -0.03    0.04
  -7  -8  -2    0.02    0.02
  -7   8  -2    0.07    0.06
  -7  -8   2    0.05    0.02
   7  -8  -2    0.04    0.03
   7  -8  -2    0.04    0.03
   0   9  -2   42.01    2.92
   0  -9   2   42.44    2.92
   0   9   2   41.20    2.92
   0   9   2   44.49    2.92
   0   9  -2   48.73    2.92
   0  -9  -2   43.30    2.92
   0   9  -2   43.18    2.92
  -1   9   2    9.27    0.65
   1   9  -2   10.03    0.64
   1   9  -2    8.67    0.64
   1   9  -2   10.60    0.65
  -1   9   2    9.17    0.64
  -1  -9   2    9.16    0.64
   1   9   2    8.58    0.64
   1   9   2    9.82    0.65
  -1   9  -2    9.68    0.64
  -1   9  -2   10.96    0.64
  -1   9  -2    9.23    0.64
  -1   9  -2    9.35    0.64
  -2   9   2   13.18    0.85
  -2   9   2   12.78    0.85
   2   9  -2   13.37    0.85
   2   9  -2   14.94    0.86
   2   9  -2   11.50    0.85
   2   9   2   11.17    0.85
  -2   9  -2   13.26    0.85
   2   9   2   11.06    0.85
  -2   9  -2   12.29    0.85
  -2   9  -2   12.73    0.85
   2   9   2   12.32    0.85
   3   9  -2    6.46    0.41
  -3   9   2    5.59    0.40
  -3   9   2    6.37    0.40
  -3   9   2    5.53    0.40
  -3   9   2    6.52    0.48
   3   9  -2    5.85    0.40
   3   9   2    5.50    0.40
  -3   9  -2    5.77    0.40
  -3   9  -2    5.10    0.40
   3   9   2    5.21    0.39
   4   9  -2   12.84    0.88
   4   9  -2   13.07    0.89
  -4   9   2   14.29    0.96
  -4   9   2   14.97    0.88
  -4   9   2   12.36    0.88
  -4   9   2   12.25    0.88
   4   9   2   11.60    0.87
  -4   9  -2   12.86    0.88
  -4   9  -2   12.51    0.88
   4  -9  -2   13.13    0.89
  -5   9   2    0.50    0.15
  -5   9   2    0.53    0.06
  -5  -9  -2    0.46    0.06
   5   9  -2    0.39    0.07
  -5   9   2    0.50    0.06
   5  -9   2    0.35    0.07
   5   9  -2    0.45    0.05
   5   9   2    0.43    0.05
   5  -9  -2    0.55    0.08
  -5   9  -2    0.58    0.14
  -5   9  -2    0.46    0.07
   6  -9   2    0.73    0.07
  -6  -9  -2    0.72    0.06
   6  -9   2    0.73    0.08
  -6   9   2    0.86    0.15
  -6   9   2    0.74    0.07
   6   9  -2    0.82    0.07
  -6  -9   2    0.83    0.07
   6   9   2    0.79    0.06
  -6   9  -2    0.93    0.14
   6  -9  -2    0.78    0.08
   7   9  -2    3.74    0.25
   7  -9   2    3.44    0.25
  -7   9   2    3.87    0.30
   7  -9  -2    3.11    0.25
  -7  -9   2    3.47    0.24
   7  -9  -2    3.21    0.26
  -7   9  -2    4.07    0.29
  -7   9  -2    3.77    0.25
   0 -10  -2   10.24    0.63
   0  10  -2    8.55    0.63
   0  10   2    9.35    0.63
   0  10  -2    9.53    0.63
   0  10   2    8.82    0.63
   0  10   2    9.23    0.63
   0  10  -2    9.53    0.63
  -1  10   2    1.08    0.09
  -1  10   2    1.22    0.09
   1  10  -2    1.11    0.09
   1  10  -2    0.99    0.09
  -1  10   2    1.13    0.09
   1  10  -2    1.31    0.10
   1  10  -2    1.07    0.09
   1  10   2    1.05    0.09
  -1  10  -2    0.97    0.08
   1  10   2    1.18    0.10
  -1  10  -2    1.09    0.09
  -1  10  -2    1.04    0.09
  -2  10   2    1.29    0.11
   2  10  -2    1.65    0.12
   2  10  -2    1.53    0.13
   2  10  -2    1.37    0.11
   2  10  -2    1.33    0.10
  -2  10   2    1.62    0.25
   2  10   2    1.17    0.11
  -2  10  -2    1.12    0.11
  -2  10  -2    1.25    0.11
  -2  10  -2    1.48    0.10
  -2  10  -2    1.26    0.12
  -3  10   2    9.30    0.68
   3  10  -2    9.70    0.68
  -3  10   2   10.58    0.68
   3  10  -2   10.81    0.69
  -3  10   2   11.77    0.76
  -3  10   2    9.52    0.68
  -3  10  -2    9.60    0.68
  -3  10  -2    9.73    0.68
   3  10   2    8.55    0.67
  -3  10  -2   10.31    0.68
  -4  10   2   23.82    1.42
  -4  10   2   19.78    1.42
   4  10  -2   20.15    1.42
  -4  10   2   20.68    1.42
   4  10  -2   19.64    1.42
  -4  10   2   24.28    1.50
  -4  10  -2   19.79    1.41
   4 -10  -2   20.25    1.43
  -4  10  -2   24.07    1.42
   4  10   2   18.22    1.41
   5 -10   2    7.49    0.57
  -5  10   2    9.53    0.65
   5  10  -2    8.18    0.56
  -5  10   2    8.05    0.56
  -5  10  -2    8.90    0.56
   5  10   2    7.77    0.56
   5 -10  -2    7.87    0.57
   6  10  -2    1.60    0.12
   6 -10   2    1.47    0.12
  -6  10   2    1.77    0.19
  -6 -10  -2    1.62    0.12
  -6 -10   2    1.52    0.12
  -6  10  -2    1.90    0.12
  -6  10  -2    1.92    0.19
   6 -10  -2    1.42    0.13
   6  10   2    1.60    0.12
  -7 -10  -2    5.74    0.39
  -7  10   2    6.16    0.40
  -7  10   2    6.36    0.43
   7 -10   2    5.59    0.40
  -7  10  -2    6.12    0.43
   7 -10  -2    5.02    0.40
  -7 -10   2    5.67    0.39
  -7  10  -2    6.23    0.40
   0  11   2    7.15    0.49
   0  11  -2    7.42    0.49
   0  11   2    7.69    0.49
   0  11  -2    6.94    0.48
   0  11   2    6.87    0.49
   0  11  -2    6.76    0.49
  -1  11   2    3.66    0.26
   1  11  -2    4.21    0.27
  -1  11   2    3.70    0.26
   1  11  -2    3.76    0.26
   1  11  -2    3.79    0.27
   1  11   2    4.20    0.27
  -1  11  -2    3.76    0.26
  -1  11  -2    3.53    0.26
  -1  11  -2    3.89    0.26
   1  11   2    3.61    0.26
   2  11  -2    2.64    0.21
   2  11  -2    3.38    0.22
   2  11  -2    3.40    0.21
  -2  11   2    2.92    0.21
  -2  11   2    2.82    0.21
   2  11  -2    2.91    0.20
  -2  11   2    2.96    0.21
   2  11   2    2.61    0.21
  -2  11  -2    2.79    0.20
  -2  11  -2    2.80    0.21
   3  11  -2   13.79    0.93
  -3  11   2   13.13    0.92
   3  11  -2   13.28    0.92
  -3  11   2   14.77    0.92
  -3  11   2   12.94    0.92
  -3  11  -2   14.82    0.92
  -3  11  -2   12.67    0.92
   4  11  -2    2.46    0.21
   4  11  -2    2.56    0.19
  -4  11   2    2.67    0.19
  -4  11   2    2.61    0.19
  -4  11   2    3.10    0.20
  -4  11  -2    3.07    0.19
   4 -11  -2    2.55    0.20
   4  11   2    2.40    0.19
  -4  11  -2    2.63    0.19
  -5  11   2    5.19    0.35
  -5  11   2    5.33    0.35
   5  11  -2    5.11    0.35
   5  11   2    4.96    0.35
   5 -11  -2    4.87    0.36
  -5  11  -2    5.38    0.35
  -6  11   2    1.92    0.18
   6  11  -2    1.54    0.12
   6 -11   2    1.43    0.12
  -6 -11  -2    1.56    0.12
  -6  11  -2    1.92    0.12
   6 -11  -2    1.45    0.13
  -6 -11   2    1.53    0.12
  -6  11  -2    1.92    0.18
   0  12  -2    1.87    0.14
   0  12   2    2.20    0.15
   0  12  -2    2.09    0.14
   0  12   2    1.94    0.14
   0  12  -2    1.84    0.14
   1  12  -2    4.12    0.27
  -1  12   2    3.55    0.26
   1  12  -2    4.00    0.26
   1  12  -2    3.18    0.25
  -1  12   2    3.78    0.26
  -1  12   2    3.54    0.25
   1  12  -2    3.36    0.25
  -1  12  -2    3.59    0.25
  -1  12  -2    4.04    0.34
   1  12   2    4.04    0.26
  -1  12  -2    3.47    0.25
   1  12   2    3.22    0.25
  -2  12   2   16.68    1.11
   2  12  -2   14.87    1.10
   2  12  -2   19.01    1.11
   2  12  -2   15.18    1.10
   2  12  -2   18.54    1.12
  -2  12   2   16.03    1.10
  -2  12   2   16.81    1.10
  -2  12  -2   15.69    1.10
   2  12   2   14.70    1.10
  -2  12  -2   16.54    1.10
   3  12  -2   11.35    0.81
   3  12  -2   10.95    0.80
  -3  12   2   11.24    0.80
  -3  12   2   12.43    0.80
  -3  12   2   13.46    0.87
  -3  12   2   11.37    0.80
  -3  12  -2   11.26    0.80
  -3  12  -2   12.31    0.80
  -4  12   2    6.95    0.43
  -4  12   2    6.10    0.42
  -4  12   2    5.94    0.42
   4  12  -2    5.73    0.42
  -5  12   2    0.52    0.05
   5  12  -2    0.50    0.05
  -5  12   2    0.63    0.06
  -5  12   2    0.48    0.06
  -5  12   2    0.60    0.14
   5  12   2    0.51    0.05
  -5  12  -2    0.59    0.06
  -5  12  -2    0.47    0.06
  -5  12  -2    0.59    0.12
  -6  12   2    4.52    0.28
   6  12  -2    4.07    0.28
   6 -12   2    3.70    0.28
  -6 -12  -2    4.49    0.28
  -6  12   2    4.30    0.32
   6 -12  -2    3.54    0.29
  -6  12  -2    4.55    0.28
  -6  12  -2    4.42    0.32
   6 -12  -2    3.57    0.28
   0  13   2    0.04    0.02
   0  13  -2    0.01    0.03
   0  13   2    0.08    0.03
   0  13  -2    0.02    0.02
   0  13  -2    0.07    0.03
   0  13  -2    0.07    0.04
   1  13  -2    9.16    0.59
  -1  13   2    8.43    0.59
  -1  13   2    9.94    0.59
  -1  13   2    8.79    0.59
  -1  13   2    8.16    0.58
   1  13  -2    7.64    0.58
   1  13  -2    9.11    0.59
   1  13  -2    7.28    0.58
   1  13   2    7.74    0.58
  -1  13  -2    9.93    0.59
   1  13   2    9.76    0.59
  -1  13  -2    8.21    0.58
  -1  13  -2    7.88    0.58
  -2  13   2    2.91    0.21
  -2  13   2    2.96    0.21
   2  13  -2    2.98    0.22
   2  13  -2    2.62    0.21
  -2  13   2    3.08    0.21
   2  13  -2    3.25    0.21
   2  13  -2    2.69    0.21
  -2  13  -2    3.19    0.29
  -2  13  -2    3.42    0.21
   2  13   2    2.61    0.21
  -2  13  -2    2.80    0.21
  -2  13  -2    2.92    0.21
  -3  13   2    1.32    0.10
  -3  13   2    1.29    0.10
  -3  13   2    1.51    0.11
   3  13  -2    1.18    0.10
  -3  13   2    1.25    0.10
  -3  13  -2    1.39    0.18
   3 -13  -2    1.15    0.12
  -3  13  -2    1.50    0.11
  -3  13  -2    1.31    0.10
  -3  13  -2    1.11    0.10
  -4  13   2    2.24    0.17
   4  13  -2    2.00    0.16
  -4  13   2    2.44    0.25
  -4  13   2    2.51    0.17
  -4  13   2    2.14    0.17
  -4  13   2    2.61    0.17
  -4  13  -2    2.48    0.23
  -4  13  -2    2.11    0.17
  -4  13  -2    2.33    0.17
  -4  13  -2    2.64    0.17
  -5  13   2    4.62    0.32
   5  13  -2    4.28    0.32
  -5  13   2    4.40    0.43
  -5  13  -2    4.69    0.33
  -5  13  -2    5.00    0.37
  -5  13  -2    5.26    0.32
  -6  13   2    4.16    0.28
   6 -13   2    3.95    0.28
   6 -13  -2    3.86    0.28
  -6  13  -2    4.51    0.28
  -6  13  -2    3.94    0.31
   0  14  -2    8.17    0.59
   0  14   2    8.17    0.59
   0  14  -2    9.33    0.60
   0  14   2    9.12    0.59
   0  14  -2    8.75    0.59
  -1  14   2    2.76    0.19
   1  14  -2    2.49    0.19
   1  14  -2    2.90    0.19
  -1  14   2    2.55    0.19
   1  14  -2    2.78    0.21
  -1  14  -2    2.62    0.19
  -1  14  -2    3.00    0.20
   1  14   2    3.16    0.20
  -1  14  -2    2.56    0.19
   1  14   2    2.42    0.19
  -2  14   2   14.15    0.95
  -2  14   2   14.43    0.95
   2  14   2   11.97    0.96
  -2  14  -2   13.96    0.95
  -2  14  -2   16.01    0.96
  -2  14  -2   14.16    0.95
  -3  14   2   37.66    2.54
  -3  14   2   39.55    2.54
  -3  14   2   40.58    2.54
  -3  14  -2   36.44    2.58
   3 -14  -2   32.64    2.54
  -3  14  -2   41.19    2.54
  -3  14  -2   35.63    2.54
  -3  14  -2   39.20    2.54
   4  14  -2    4.02    0.31
  -4  14   2    4.43    0.32
  -4  14   2    4.78    0.32
  -4  14   2    4.86    0.32
  -4  14  -2    4.55    0.36
  -4  14  -2    4.77    0.32
  -4  14  -2    5.03    0.32
  -4  14  -2    4.49    0.32
  -5  14   2    0.64    0.06
  -5  14   2    0.65    0.06
   5  14  -2    0.62    0.05
   5 -14   2    0.52    0.05
  -5  14  -2    0.58    0.11
  -5  14  -2    0.69    0.06
   0  15  -2    1.10    0.10
   0  15  -2    1.07    0.09
   0  15   2    0.85    0.10
   0  15   2    1.05    0.11
   1  15  -2    1.09    0.09
   1  15  -2    1.16    0.09
  -1  15   2    1.13    0.10
   1  15  -2    1.13    0.11
  -1  15  -2    1.19    0.10
   1  15   2    1.43    0.11
   1  15   2    1.09    0.09
  -1  15  -2    1.13    0.10
   2  15  -2    0.65    0.07
  -2  15   2    0.82    0.07
  -2  15   2    0.81    0.07
  -2  15  -2    0.78    0.07
   2  15   2    0.79    0.07
  -2  15  -2    0.77    0.07
  -2  15  -2    0.84    0.07
  -3  15   2    2.84    0.21
  -3  15   2    2.98    0.21
  -3  15   2    2.99    0.21
  -3  15  -2    3.13    0.21
  -3  15  -2    2.99    0.21
  -3  15  -2    2.92    0.21
   4  15  -2    7.24    0.57
  -4  15   2    7.96    0.58
  -4  15   2    9.11    0.58
  -4  15   2    9.38    0.58
  -4  15  -2    8.69    0.58
  -4  15  -2    8.96    0.58
  -4  15  -2    8.44    0.58
   5 -15   2    2.55    0.18
   5 -15  -2    2.54    0.18
  -5  15  -2    2.80    0.18
   0  16   2    1.21    0.09
   0  16   2    1.09    0.08
   0  16  -2    1.11    0.08
   0  16  -2    0.99    0.10
   0  16  -2    1.08    0.08
  -1  16   2    4.09    0.26
   1  16  -2    3.97    0.26
  -1  16   2    3.56    0.26
   1  16  -2    3.73    0.26
  -1  16  -2    3.83    0.26
  -1  16  -2    3.72    0.26
   1  16   2    3.49    0.26
  -1  16  -2    3.58    0.26
  -2  16   2    0.63    0.05
  -2  16   2    0.60    0.05
  -2  16  -2    0.52    0.06
  -2  16  -2    0.56    0.05
  -2  16  -2    0.60    0.05
   2  16   2    0.56    0.06
  -3  16   2    0.62    0.05
  -3  16   2    0.57    0.05
  -3  16  -2    0.55    0.05
  -3  16  -2    0.54    0.05
  -3  16  -2    0.50    0.05
  -4  16   2    6.83    0.44
  -4  16  -2    6.09    0.44
  -4  16  -2    6.45    0.44
   0  17   2    3.68    0.25
   0  17  -2    3.55    0.25
   0  17   2    3.76    0.25
   0  17  -2    3.62    0.25
  -1  17   2    1.65    0.11
   1  17  -2    1.47    0.11
  -1  17   2    1.53    0.11
   1  17  -2    1.46    0.11
  -1  17  -2    1.51    0.11
   1  17   2    1.49    0.11
  -1  17  -2    1.57    0.11
  -1  17  -2    1.27    0.12
  -2  17   2    0.67    0.05
  -2  17   2    0.62    0.05
  -2  17  -2    0.62    0.05
  -2  17  -2    0.52    0.06
  -2  17  -2    0.61    0.05
  -3  17   2    5.56    0.37
  -3  17   2    5.49    0.36
  -3  17  -2    5.37    0.37
  -3  17  -2    5.19    0.36
   0  18  -2    0.77    0.06
   0  18  -2    0.67    0.06
   0  18   2    0.82    0.06
  -1  18   2    0.73    0.06
  -1  18   2    0.63    0.05
   1  18   2    0.53    0.06
  -1  18  -2    0.65    0.05
  -1  18  -2    0.62    0.05
  -2  18   2    0.52    0.04
  -2  18   2    0.47    0.05
  -2  18  -2    0.51    0.04
  -2  18  -2    0.45    0.04
   0   0  -3    0.00    0.02
   0   0   3   -0.15    0.19
   0   0  -3    0.04    0.18
   0   0   3    0.01    0.02
   1   0   3   30.54    2.36
  -1   0  -3   28.91    2.20
   1   0   3   31.46    2.19
  -1   0   3   32.10    2.19
   1   0  -3   30.79    2.19
   1   0  -3   37.86    2.41
  -1   0  -3   38.19    2.35
  -2   0   3    0.95    0.06
   2   0  -3    0.68    0.38
   2   0   3    0.81    0.06
   2   0  -3    0.90    0.08
  -2   0  -3    0.91    0.34
  -2   0   3    0.81    0.30
  -2   0  -3    0.67    0.37
   2   0   3    0.77    0.07
  -2   0  -3    0.72    0.08
  -3   0   3   74.96    4.75
  -3   0   3   72.38    5.12
   3   0  -3   74.53    4.78
   3   0   3   71.91    4.75
  -3   0  -3   60.55    5.16
   3   0  -3   75.86    5.34
  -3   0  -3   68.90    5.10
   3   0   3   69.20    4.77
   4   0  -3    0.20    0.04
   4   0   3    0.18    0.04
  -4   0   3    0.20    0.03
   4   0  -3    0.13    0.03
   4   0   3    0.23    0.04
   4   0  -3    0.25    0.03
  -4   0  -3    0.20    0.03
  -4   0  -3    0.18    0.10
   4   0   3    0.25    0.03
   4   0  -3    0.15    0.04
   4   0   3    0.24    0.03
  -5   0  -3   10.29    0.65
   5   0   3    9.99    0.66
  -5   0   3   10.02    0.65
   5   0   3    9.86    0.65
   5   0  -3   10.52    0.67
  -5   0  -3    8.67    0.72
  -5   0   3    8.75    0.74
   5   0  -3    9.24    0.66
   6   0   3   24.72    1.64
   6   0  -3   22.46    1.63
  -6   0  -3   21.38    1.69
   6   0  -3   24.64    1.64
  -6   0   3   24.52    1.63
  -6   0  -3   24.84    1.62
   6   0   3   25.29    1.63
   6   0   3   26.27    1.63
   6   0  -3   27.60    1.63
  -6   0   3   20.71    1.72
  -7   0   3    0.16    0.03
  -7   0   3    0.14    0.11
  -7   0  -3    0.14    0.11
   7   0  -3    0.14    0.03
  -7   0  -3    0.18    0.03
   7   0  -3    0.20    0.04
   7   0   3    0.24    0.05
   7   0   3    0.18    0.03
   7   0   3    0.20    0.04
   8   0  -3    4.75    0.32
   8   0  -3    4.43    0.31
   0   1   3  114.36    7.42
   0   1  -3  112.09    7.40
   0  -1  -3   99.60    7.40
   1   1  -3   85.41    5.57
  -1   1  -3   76.36    5.52
   1  -1  -3   84.38    5.60
   1   1   3   76.48    5.56
   2   1  -3   40.81    2.67
  -2   1   3   40.78    2.65
   2  -1   3   36.10    2.66
  -2  -1  -3   40.06    2.94
   2  -1   3   38.37    2.65
   2   1  -3   41.50    2.95
  -2  -1  -3   43.33    2.88
  -2   1   3   43.48    2.91
  -2  -1  -3   35.23    2.66
  -2   1  -3   37.04    2.86
  -2   1  -3   33.59    2.66
  -2   1  -3   37.18    2.94
   2   1   3   39.01    2.66
   2  -1  -3   41.48    2.67
   2   1   3   38.08    2.65
  -2  -1   3   45.87    2.65
   2  -1  -3   38.52    2.65
   2  -1  -3   43.76    3.01
   3  -1   3    2.83    0.23
  -3  -1  -3    2.55    0.23
  -3   1   3    3.21    0.21
   3  -1   3    3.01    0.20
  -3   1   3    3.87    1.01
   3   1  -3    3.03    0.24
   3   1  -3    3.07    0.76
  -3  -1  -3    3.04    0.69
  -3  -1   3    3.44    0.21
   3   1   3    2.94    0.22
   3  -1  -3    3.31    0.20
   3  -1  -3    3.16    0.24
  -3   1  -3    2.35    0.81
   3  -1  -3    3.38    1.03
  -3  -1   3    2.66    0.68
  -3   1  -3    2.61    0.23
   4   1  -3    4.28    0.31
   4  -1   3    3.99    0.30
   4  -1   3    3.98    0.30
   4  -1   3    4.19    0.30
  -4   1   3    4.61    0.30
   4   1  -3    3.87    0.30
  -4   1   3    4.46    0.29
  -4  -1  -3    3.79    0.34
   4  -1   3    4.80    0.39
  -4  -1  -3    4.33    0.29
   4   1  -3    4.80    0.30
   4   1  -3    4.43    0.31
   4  -1  -3    4.61    0.31
  -4   1  -3    3.89    0.36
  -4  -1   3    4.30    0.29
   4   1   3    4.91    0.30
  -4  -1   3    4.78    0.30
   4   1   3    4.27    0.30
   4   1   3    4.47    0.30
  -4   1  -3    3.92    0.35
   4  -1  -3    3.91    0.30
  -4   1  -3    4.45    0.29
   4   1   3    4.08    0.30
   5  -1   3    1.63    0.11
  -5  -1  -3    1.39    0.10
  -5  -1  -3    1.10    0.21
   5  -1   3    1.36    0.11
   5   1  -3    1.29    0.11
  -5   1   3    1.24    0.20
   5  -1   3    1.38    0.11
   5   1  -3    1.45    0.12
  -5   1   3    1.35    0.10
   5   1   3    1.40    0.11
   5   1   3    1.32    0.10
  -5  -1   3    1.21    0.21
  -5   1  -3    1.49    0.10
   5  -1  -3    1.25    0.11
  -5   1  -3    1.15    0.18
  -5  -1   3    1.35    0.10
   5  -1  -3    1.40    0.12
   5   1   3    1.49    0.10
   6   1  -3   15.98    0.97
   6  -1   3   15.36    0.97
   6   1  -3   13.53    0.97
  -6  -1  -3   12.36    1.03
   6  -1   3   14.96    0.97
  -6   1   3   14.71    0.97
  -6   1   3   12.38    1.06
  -6  -1  -3   14.31    0.96
   6   1  -3   15.26    0.98
   6  -1   3   14.36    0.98
  -6  -1   3   14.21    0.97
   6   1   3   15.61    0.97
  -6  -1   3   12.50    1.06
  -6   1  -3   13.05    1.03
   6  -1  -3   13.09    0.97
  -6   1  -3   15.13    0.96
   6  -1  -3   14.99    0.98
   6   1   3   15.53    0.97
   6   1   3   15.56    0.98
   7   1  -3    3.47    0.24
   7  -1   3    3.59    0.23
  -7   1   3    2.83    0.32
   7  -1   3    3.65    0.24
  -7   1   3    3.29    0.22
   7  -1   3    3.42    0.23
  -7  -1  -3    3.40    0.22
   7   1  -3    3.14    0.23
  -7  -1   3    3.25    0.22
  -7   1  -3    3.09    0.29
  -7  -1   3    2.84    0.32
   7  -1  -3    3.26    0.24
   7  -1  -3    2.93    0.23
  -7   1  -3    3.39    0.22
   7   1   3    3.33    0.23
  -8   1   3    1.70    0.22
   8   1  -3    2.23    0.14
  -8  -1   3    1.88    0.14
   8  -1  -3    2.00    0.14
   8  -1  -3    2.12    0.15
   0   2  -3  929.35   64.55
   0   2   3 1000.00   64.60
  -1   2   3   39.40    2.98
  -1   2  -3   45.34    3.13
   1  -2  -3   50.53    3.23
   1  -2  -3   39.51    2.98
   1   2   3   49.09    3.18
  -2   2   3    3.91    0.26
   2   2  -3    4.02    0.68
   2  -2   3    3.46    0.27
  -2   2   3    4.25    0.69
  -2  -2  -3    3.42    0.71
  -2  -2  -3    3.45    0.27
  -2  -2  -3    4.44    0.66
   2  -2   3    3.66    0.26
   2  -2  -3    3.63    0.26
   2   2   3    4.42    0.27
  -2   2  -3    4.70    0.64
   2  -2  -3    3.56    0.84
   2  -2  -3    4.13    0.28
  -2   2  -3    2.98    0.70
  -2  -2   3    4.46    0.59
   3  -2   3   30.25    2.05
   3  -2   3   31.91    2.01
  -3   2   3   31.63    2.01
   3   2  -3   30.64    2.03
  -3  -2  -3   26.79    2.03
  -3   2   3   28.89    2.49
   3  -2  -3   30.29    2.84
  -3   2  -3   24.56    2.46
   3  -2  -3   32.42    2.01
  -3   2  -3   26.87    2.03
   3  -2  -3   32.24    2.04
   3   2   3   32.08    2.03
   4  -2   3    4.36    0.33
   4   2  -3    5.06    0.34
  -4   2   3    4.55    0.33
  -4  -2  -3    4.51    0.32
   4  -2   3    4.41    0.33
  -4   2   3    4.21    0.40
   4  -2   3    4.57    0.33
   4   2  -3    4.76    0.33
  -4   2   3    4.88    0.32
   4   2  -3    4.26    0.32
   4   2  -3    5.26    0.33
   4  -2   3    4.74    0.38
  -4   2  -3    4.20    0.38
   4   2   3    5.08    0.32
  -4   2  -3    5.25    0.32
   4   2   3    5.05    0.33
   4  -2  -3    5.02    0.32
  -4   2  -3    4.27    0.38
   4   2   3    4.81    0.32
   4  -2  -3    4.26    0.33
  -4  -2   3    4.80    0.32
   4  -2  -3    5.26    0.34
   4   2   3    5.13    0.33
   5   2  -3    4.13    0.29
   5  -2   3    3.99    0.28
   5  -2   3    3.88    0.28
  -5   2   3    4.17    0.27
  -5   2   3    4.02    0.28
   5   2  -3    4.09    0.29
  -5  -2  -3    3.87    0.27
  -5   2   3    3.60    0.37
   5   2  -3    4.50    0.28
   5   2  -3    3.68    0.28
   5  -2   3    3.95    0.28
   5   2   3    4.20    0.28
   5  -2  -3    3.57    0.28
  -5   2  -3    4.37    0.27
  -5   2  -3    3.66    0.35
   5   2   3    4.15    0.28
   5   2   3    3.81    0.29
   5  -2  -3    4.30    0.29
  -5  -2   3    4.15    0.28
   6   2  -3   23.22    1.60
   6  -2   3   24.51    1.61
   6   2  -3   24.67    1.61
  -6   2   3   20.70    1.69
   6  -2   3   23.00    1.61
   6   2  -3   26.21    1.60
  -6   2   3   24.24    1.60
  -6  -2  -3   23.53    1.60
   6  -2   3   24.12    1.60
   6  -2  -3   24.91    1.62
   6  -2  -3   22.27    1.61
  -6   2  -3   25.76    1.60
   6   2   3   27.07    1.60
  -6  -2   3   23.63    1.60
  -6   2  -3   22.13    1.67
  -6  -2   3   20.37    1.69
   6   2   3   25.29    1.60
   7  -2   3    0.54    0.06
   7   2  -3    0.60    0.07
  -7  -2  -3    0.52    0.05
   7   2  -3    0.54    0.06
   7  -2   3    0.55    0.06
   7  -2   3    0.61    0.06
  -7   2   3    0.46    0.15
  -7   2   3    0.59    0.05
   7   2   3    0.54    0.07
  -7  -2   3    0.42    0.16
  -7  -2   3    0.49    0.05
   7  -2  -3    0.59    0.07
  -7   2  -3    0.47    0.14
   7  -2  -3    0.50    0.06
   7   2   3    0.65    0.06
   8   2  -3    0.46    0.06
   8   2  -3    0.35    0.04
  -8   2   3    0.30    0.13
  -8  -2  -3    0.32    0.03
   8  -2  -3    0.42    0.05
  -8  -2   3    0.39    0.04
   8  -2  -3    0.38    0.05
   1   3  -3  252.68   16.65
   1   3   3  264.05   16.70
  -1   3  -3  236.51   16.85
   1  -3  -3  235.54   16.73
   2  -3   3   10.17    0.74
  -2  -3  -3   10.36    1.10
  -2  -3  -3   10.90    0.74
   2  -3   3   11.32    0.73
  -2   3   3   11.41    1.11
  -2   3   3   11.53    0.73
   2   3  -3   11.12    0.74
   2  -3  -3   10.84    1.27
  -2   3  -3   10.40    1.06
   2  -3  -3   10.81    0.73
  -2   3  -3    9.43    0.74
   2  -3  -3   12.18    0.75
  -2   3  -3    8.78    1.08
  -3  -3  -3   18.28    1.39
  -3   3   3   21.55    1.37
   3  -3   3   21.56    1.37
   3  -3   3   19.73    1.39
   3   3  -3   19.94    1.39
  -3   3  -3   18.23    1.39
   3   3   3   24.00    1.39
   3  -3  -3   21.99    1.41
   3  -3  -3   20.80    1.37
   3  -3  -3   18.61    2.43
  -3   3  -3   17.65    1.98
  -4  -3  -3    0.77    0.07
   4  -3   3    0.86    0.08
  -4   3   3    0.76    0.08
  -4   3   3    0.83    0.07
   4   3  -3    0.82    0.09
   4   3  -3    0.97    0.07
   4  -3   3    0.70    0.19
   4   3  -3    0.68    0.07
  -4   3   3    0.70    0.16
   4  -3   3    0.82    0.08
   4  -3   3    0.73    0.08
   4   3  -3    0.84    0.09
  -4   3  -3    0.94    0.06
  -4  -3   3    0.83    0.08
   4  -3  -3    0.84    0.09
   4   3   3    0.90    0.08
   4   3   3    0.80    0.07
   4  -3  -3    0.77    0.09
   4   3   3    0.84    0.07
  -4   3  -3    0.72    0.14
  -4   3  -3    0.95    0.09
   4   3   3    0.85    0.07
   5  -3   3    6.09    0.43
   5   3  -3    6.46    0.44
  -5  -3  -3    5.96    0.43
   5  -3   3    5.86    0.44
  -5   3   3    6.56    0.43
   5   3  -3    6.37    0.44
  -5   3   3    5.38    0.51
   5   3  -3    5.80    0.43
   5  -3   3    6.10    0.43
   5   3  -3    6.81    0.43
   5   3   3    7.05    0.44
   5  -3  -3    6.54    0.45
   5   3   3    6.79    0.43
  -5   3  -3    7.21    0.43
   5  -3  -3    5.52    0.43
  -5   3  -3    5.81    0.50
   5   3   3    6.52    0.43
   5   3   3    6.87    0.43
  -5  -3   3    6.34    0.43
   6   3  -3    6.39    0.45
  -6  -3  -3    6.41    0.45
   6  -3   3    6.90    0.46
  -6   3   3    6.98    0.45
  -6   3   3    6.03    0.55
   6  -3   3    6.71    0.46
   6   3  -3    7.16    0.46
   6   3  -3    7.25    0.46
   6  -3   3    6.48    0.46
  -6   3  -3    7.06    0.45
  -6   3  -3    6.18    0.52
   6  -3  -3    6.91    0.47
   6  -3  -3    5.98    0.46
   6   3   3    6.89    0.45
  -6  -3   3    6.47    0.45
   7   3  -3    1.14    0.09
   7  -3   3    1.30    0.10
   7  -3   3    1.20    0.10
   7  -3   3    1.10    0.10
   7   3  -3    1.35    0.10
  -7  -3  -3    1.16    0.09
   7   3  -3    1.31    0.09
  -7   3   3    1.02    0.18
  -7  -3   3    1.06    0.19
   7  -3  -3    1.15    0.11
  -7  -3   3    1.05    0.09
  -7   3  -3    1.21    0.17
   7  -3  -3    1.09    0.10
  -8   3   3    0.79    0.16
   8  -3   3    0.73    0.08
  -8  -3  -3    0.92    0.06
   8  -3  -3    1.02    0.08
  -8  -3   3    0.84    0.07
   8  -3  -3    0.92    0.08
   0  -4   3   -0.01    0.16
   0   4  -3    0.09    0.02
   0   4   3    0.10    0.01
   0  -4  -3    0.10    0.01
   0   4   3    0.08    0.30
   0   4  -3    0.25    0.20
   0  -4  -3    0.24    0.23
   1  -4   3   19.51    1.35
  -1   4   3   19.87    1.35
   1   4  -3   21.06    1.48
   1  -4   3   20.45    1.35
   1  -4  -3   19.28    1.78
   1  -4  -3   18.34    1.35
   1   4   3   23.06    1.60
  -1   4  -3   21.90    1.54
   1   4   3   18.29    1.35
  -2  -4  -3    5.06    0.36
  -2  -4  -3    5.20    0.84
  -2   4   3    5.01    0.87
   2  -4   3    5.45    0.34
   2  -4   3    4.98    0.36
  -2   4  -3    3.93    0.86
  -2   4  -3    4.20    0.80
   2  -4  -3    5.23    0.34
   2  -4  -3    4.45    1.06
   2  -4  -3    5.60    0.37
  -2   4  -3    4.66    0.36
  -3   4   3   15.85    1.02
   3  -4   3   16.31    1.02
   3   4  -3   14.55    1.04
   3  -4   3   15.08    1.05
  -3  -4  -3   13.54    1.04
   3  -4  -3   15.52    1.02
   3  -4  -3   15.65    1.08
   4   4  -3    2.91    0.23
  -4   4   3    3.51    0.23
   4  -4   3    3.01    0.24
  -4   4   3    2.95    0.31
   4  -4   3    2.92    0.24
   4   4  -3    3.57    0.25
  -4  -4  -3    3.00    0.23
   4   4  -3    3.56    0.24
   4   4  -3    3.67    0.23
  -4   4   3    3.34    0.24
  -4   4  -3    3.76    0.23
  -4   4  -3    3.29    0.24
   4   4   3    3.67    0.23
  -4   4  -3    3.10    0.29
   4  -4  -3    3.78    0.25
   4   4   3    3.38    0.23
   4   4   3    3.71    0.24
  -4  -4   3    3.28    0.24
   5  -4   3    0.10    0.04
   5   4  -3    0.03    0.03
   5  -4   3    0.06    0.03
   5   4  -3    0.06    0.04
   5  -4   3    0.08    0.03
  -5   4   3    0.02    0.03
  -5  -4  -3    0.03    0.02
  -5   4   3    0.05    0.02
  -5   4   3    0.04    0.09
   5   4  -3    0.06    0.02
   5   4  -3    0.08    0.03
  -5  -4   3    0.04    0.03
   5  -4  -3    0.02    0.04
  -5   4  -3    0.10    0.08
   5   4   3    0.06    0.03
   5   4   3    0.09    0.03
  -5   4  -3    0.06    0.02
   5  -4  -3    0.03    0.03
   5   4   3    0.06    0.02
   5   4   3    0.06    0.02
  -6  -4  -3    0.42    0.04
   6  -4   3    0.37    0.06
   6  -4   3    0.45    0.06
   6   4  -3    0.46    0.06
   6  -4   3    0.47    0.06
   6   4  -3    0.38    0.05
   6   4  -3    0.36    0.05
  -6   4   3    0.38    0.06
  -6   4   3    0.36    0.15
   6   4   3    0.38    0.06
   6  -4  -3    0.37    0.06
  -6   4  -3    0.42    0.14
   6   4   3    0.53    0.05
  -6  -4   3    0.39    0.05
   6  -4  -3    0.41    0.07
   6  -4  -3    0.43    0.07
   6   4   3    0.46    0.05
  -6  -4   3    0.39    0.17
   7  -4   3    8.21    0.49
   7   4  -3    8.20    0.49
   7  -4   3    7.23    0.50
   7  -4   3    7.42    0.49
   7   4  -3    7.66    0.49
  -7  -4  -3    7.00    0.49
  -7   4   3    6.63    0.57
  -7  -4   3    6.17    0.57
   7  -4  -3    7.31    0.50
  -7  -4   3    7.05    0.49
  -7   4  -3    7.26    0.55
   7  -4  -3    6.88    0.50
  -8  -4  -3    1.82    0.13
  -8   4   3    1.93    0.22
   8  -4  -3    1.91    0.14
   8  -4  -3    1.85    0.15
  -8   4  -3    1.88    0.24
   0   5  -3   74.33    5.07
  -1  -5  -3   51.99    3.00
  -1   5   3   44.77    2.98
   1   5  -3   43.19    3.03
   1  -5   3   45.17    2.98
   1  -5   3   41.96    2.99
  -1  -5   3   48.55    3.04
  -1   5  -3   38.77    3.17
   1  -5  -3   50.91    3.00
  -1   5  -3   37.85    2.99
   1  -5  -3   45.13    3.28
   1   5   3   44.31    2.98
   1  -5  -3   41.31    2.98
  -2  -5  -3   63.88    4.51
   2  -5   3   63.97    4.51
   2   5  -3   63.78    4.63
   2  -5   3   70.17    4.49
  -2   5  -3   65.51    4.80
   2  -5  -3   65.87    4.49
   2  -5  -3   74.40    5.12
   2  -5  -3   70.91    4.52
   3  -5   3    6.41    0.42
  -3   5   3    5.57    0.49
   3   5  -3    6.90    0.43
  -3  -5  -3    5.41    0.44
   3   5  -3    7.01    0.42
  -3   5   3    5.96    0.42
   3  -5   3    6.02    0.45
   3   5  -3    5.77    0.43
   3  -5  -3    6.49    0.47
   3   5   3    6.05    0.42
  -3   5  -3    6.22    0.47
  -3   5  -3    6.11    0.42
   3  -5  -3    6.10    0.42
   4  -5   3    0.56    0.08
   4   5  -3    0.65    0.08
   4   5  -3    0.54    0.06
  -4   5   3    0.57    0.06
   4   5  -3    0.63    0.08
  -4   5   3    0.66    0.07
   4   5  -3    0.66    0.06
  -4   5   3    0.57    0.15
  -4  -5  -3    0.54    0.07
   4  -5  -3    0.63    0.09
  -4   5  -3    0.65    0.06
   4   5   3    0.57    0.05
   4  -5  -3    0.60    0.08
  -4   5  -3    0.65    0.13
   4   5   3    0.67    0.07
   5   5  -3    1.48    0.13
  -5   5   3    1.28    0.21
   5   5  -3    1.40    0.11
  -5  -5  -3    1.33    0.10
   5  -5   3    1.25    0.12
   5  -5   3    1.37    0.12
   5   5  -3    1.54    0.11
  -5   5   3    1.41    0.11
   5  -5  -3    1.55    0.13
  -5  -5   3    1.34    0.11
  -5   5  -3    1.40    0.19
   5   5   3    1.43    0.10
   5   5   3    1.44    0.11
   5  -5  -3    1.24    0.12
   6   5  -3    2.97    0.19
  -6  -5  -3    2.64    0.19
  -6   5   3    2.91    0.20
   6  -5   3    2.84    0.20
   6  -5   3    2.78    0.19
  -6   5   3    2.59    0.29
   6   5  -3    2.75    0.19
   6  -5   3    2.57    0.20
   6  -5  -3    2.44    0.20
   6   5   3    2.79    0.19
   6  -5  -3    2.84    0.21
  -6   5  -3    2.75    0.27
   6  -5  -3    2.41    0.20
  -6  -5   3    2.64    0.19
  -6  -5   3    2.25    0.30
  -7   5   3    1.70    0.21
   7  -5   3    1.65    0.13
  -7  -5  -3    1.70    0.12
   7  -5   3    2.04    0.13
   7  -5   3    1.75    0.13
   7   5  -3    1.74    0.13
   7  -5  -3    1.79    0.14
  -7  -5   3    1.69    0.12
   7  -5  -3    1.60    0.13
  -7   5  -3    1.80    0.19
  -8  -5  -3    7.03    0.49
  -8   5   3    7.46    0.53
   8  -5  -3    6.93    0.49
   8  -5  -3    7.87    0.49
  -8  -5   3    6.92    0.49
   0  -6   3   10.24    0.64
   0   6  -3    8.58    0.76
   0  -6  -3    9.78    0.64
   0   6   3    9.52    0.64
   0  -6  -3    9.46    0.97
   1  -6   3   12.50    0.81
  -1  -6  -3   13.39    0.80
  -1  -6  -3   13.72    0.82
  -1  -6   3   12.39    0.80
   1  -6  -3    9.77    1.26
   1  -6  -3   10.73    0.80
   1   6   3   10.97    1.09
   1  -6  -3   12.51    0.83
  -1   6  -3   10.52    0.81
   2  -6   3    6.42    0.44
   2  -6   3    6.50    0.42
  -2   6   3    6.32    0.42
  -2  -6  -3    5.71    0.43
   2  -6  -3    6.64    0.46
   2  -6  -3    5.84    0.42
  -3   6   3    2.16    0.17
  -3   6   3    2.09    0.25
   3   6  -3    2.65    0.18
   3   6  -3    2.46    0.17
  -3   6  -3    2.33    0.23
  -3   6  -3    2.22    0.17
   3   6   3    2.68    0.17
  -3   6  -3    2.52    0.17
  -3   6  -3    2.16    0.17
   3   6   3    2.06    0.16
   4   6  -3    3.48    0.25
  -4   6   3    3.47    0.34
   4  -6   3    3.39    0.27
  -4  -6  -3    3.34    0.26
   4   6  -3    4.05    0.27
  -4   6   3    3.66    0.26
   4   6   3    4.36    0.26
   4  -6  -3    4.01    0.29
   4   6   3    3.66    0.26
  -4   6  -3    3.74    0.26
  -5   6   3    6.26    0.54
  -5  -6  -3    6.23    0.45
   5   6  -3    6.92    0.47
   5   6  -3    7.10    0.45
   5   6  -3    6.60    0.45
   5  -6   3    6.49    0.46
   5  -6   3    6.19    0.46
  -5   6   3    6.68    0.45
   5  -6  -3    5.87    0.46
   5   6   3    6.43    0.45
   5   6   3    7.02    0.45
  -5   6  -3    7.14    0.53
   5  -6  -3    7.23    0.47
  -5  -6   3    6.37    0.45
   6   6  -3    1.46    0.10
   6  -6   3    1.34    0.11
   6   6  -3    1.44    0.10
  -6   6   3    1.39    0.11
   6  -6   3    1.17    0.15
  -6  -6  -3    1.19    0.10
   6  -6   3    1.19    0.11
   6  -6  -3    1.11    0.12
  -6  -6   3    1.28    0.10
   6  -6  -3    1.38    0.12
   6   6   3    1.35    0.10
  -6   6  -3    1.36    0.18
   7  -6   3    0.68    0.06
   7  -6   3    0.72    0.07
   7   6  -3    0.70    0.06
  -7   6   3    0.64    0.14
   7  -6   3    0.68    0.07
  -7  -6  -3    0.57    0.05
  -7   6  -3    0.68    0.12
   7  -6  -3    0.60    0.07
   7  -6  -3    0.57    0.07
   7  -6  -3    0.53    0.07
  -7  -6   3    0.58    0.05
  -8   6   3    0.64    0.12
  -8  -6  -3    0.56    0.04
  -8  -6   3    0.60    0.05
   8  -6  -3    0.62    0.06
   0  -7   3   47.14    3.14
   0   7   3   50.56    3.14
   0  -7  -3   49.86    3.15
   0  -7  -3   42.66    3.38
   0  -7  -3   43.95    3.14
  -1  -7  -3   35.90    2.20
  -1  -7  -3   33.64    2.21
  -1  -7  -3   32.84    2.41
   1  -7   3   37.13    2.21
   1  -7   3   31.58    2.20
  -1   7   3   31.67    2.20
  -1  -7   3   32.81    2.20
   1  -7  -3   30.70    2.22
   1  -7  -3   29.77    2.20
   2   7  -3   10.53    0.67
   2   7  -3   10.83    0.66
   2  -7   3    9.74    0.66
  -2   7   3    9.12    0.66
  -2   7   3   10.51    0.67
  -2   7  -3    9.36    0.66
  -2   7  -3   10.13    0.66
   2  -7  -3    9.88    0.70
   2  -7  -3    8.70    0.66
  -2   7  -3    9.52    0.66
  -3   7   3    3.69    0.26
   3   7  -3    3.81    0.25
  -3   7   3    3.53    0.34
  -3   7   3    3.47    0.25
   3   7  -3    3.86    0.27
  -3   7  -3    3.30    0.25
  -3   7  -3    3.85    0.31
  -3   7  -3    3.47    0.25
   3   7   3    3.90    0.26
   3   7   3    3.33    0.25
  -3   7  -3    4.04    0.26
   4   7  -3    2.90    0.21
   4  -7   3    2.29    0.20
   4   7  -3    2.47    0.18
  -4   7   3    2.50    0.19
  -4   7   3    2.48    0.27
   4   7  -3    2.69    0.19
   4  -7  -3    2.86    0.21
  -4   7  -3    2.74    0.26
  -4   7  -3    2.66    0.19
  -4   7  -3    2.49    0.19
   4   7   3    2.52    0.18
   4   7   3    2.94    0.19
   5   7  -3    0.28    0.06
  -5   7   3    0.25    0.04
   5   7  -3    0.48    0.08
   5   7  -3    0.37    0.05
  -5   7   3    0.38    0.06
   5  -7   3    0.30    0.06
  -5   7   3    0.31    0.14
   5   7  -3    0.37    0.05
  -5  -7  -3    0.31    0.05
   5  -7  -3    0.41    0.07
   5   7   3    0.34    0.05
  -5  -7   3    0.29    0.05
   5   7   3    0.30    0.04
   5  -7  -3    0.35    0.07
  -5   7  -3    0.41    0.13
  -6   7   3    4.31    0.39
  -6   7   3    4.02    0.31
   6  -7   3    4.10    0.30
   6   7  -3    4.37    0.29
   6  -7   3    3.92    0.30
   6  -7  -3    4.47    0.31
  -6  -7   3    3.99    0.29
  -6   7  -3    4.51    0.37
   6  -7  -3    3.98    0.30
   6   7   3    4.37    0.29
   7  -7   3    9.61    0.66
   7   7  -3   10.00    0.66
  -7  -7  -3    9.56    0.66
   7  -7   3    9.94    0.67
  -7   7   3    9.71    0.72
  -7  -7   3    9.45    0.66
   7  -7  -3    9.63    0.66
  -7   7  -3   10.80    0.71
   7  -7  -3    9.44    0.67
   0   8   3    1.02    0.08
   0  -8   3    1.14    0.08
   0   8   3    1.04    0.08
   0   8  -3    1.04    0.08
   0  -8  -3    1.07    0.10
   0   8  -3    0.99    0.08
   0  -8  -3    1.08    0.08
   1   8  -3    9.08    0.54
   1   8  -3    8.58    0.54
  -1  -8  -3    9.34    0.54
   1  -8   3    8.01    0.54
  -1   8   3    7.33    0.54
  -1   8   3    7.67    0.54
  -1   8   3    7.71    0.54
  -1   8  -3    7.85    0.54
  -1   8  -3    7.81    0.54
   1  -8  -3    7.41    0.54
  -1  -8   3    8.08    0.54
   1  -8  -3    7.45    0.56
   1   8   3    7.09    0.54
   1   8   3    8.35    0.54
   2   8  -3    7.76    0.50
  -2   8   3    7.13    0.51
   2   8  -3    7.49    0.51
  -2   8   3    6.72    0.50
   2   8  -3    8.40    0.51
   2  -8  -3    8.31    0.51
   2   8   3    7.59    0.51
  -2   8  -3    7.45    0.50
  -2   8  -3    6.74    0.50
  -2   8  -3    6.87    0.50
   3   8  -3    3.74    0.27
  -3   8   3    3.30    0.25
  -3   8   3    3.75    0.26
  -3   8   3    3.49    0.34
   3   8  -3    3.55    0.25
   3   8   3    3.80    0.25
  -3   8  -3    3.35    0.25
  -3   8  -3    3.78    0.25
  -3   8  -3    3.94    0.32
  -3   8  -3    3.39    0.25
   4   8  -3    7.42    0.50
   4   8  -3    7.07    0.48
  -4   8   3    6.96    0.57
  -4   8   3    6.44    0.48
  -4   8  -3    7.92    0.48
   4   8   3    6.32    0.48
  -4   8  -3    6.71    0.48
   4  -8  -3    7.31    0.50
  -4   8  -3    7.64    0.56
   4   8   3    6.92    0.48
  -5  -8  -3    4.45    0.32
   5   8  -3    4.96    0.32
  -5   8   3    4.92    0.42
   5   8  -3    4.84    0.34
   5  -8   3    4.06    0.33
  -5   8   3    4.57    0.32
  -5   8   3    4.79    0.33
  -5  -8   3    4.74    0.33
   5   8   3    4.51    0.32
   5  -8  -3    5.06    0.34
  -6   8   3    1.15    0.09
   6   8  -3    1.15    0.11
  -6   8   3    1.10    0.18
   6  -8   3    1.13    0.09
   6   8  -3    1.17    0.09
  -6  -8  -3    1.03    0.08
   6  -8   3    1.05    0.10
   6   8   3    1.16    0.09
  -6  -8   3    1.04    0.09
   6  -8  -3    1.21    0.11
  -6   8  -3    1.30    0.17
   7  -8   3    1.70    0.13
  -7   8   3    1.80    0.18
   7   8  -3    1.73    0.12
  -7  -8  -3    1.72    0.12
  -7  -8   3    1.66    0.12
   7  -8  -3    1.68    0.13
   7  -8  -3    1.41    0.13
  -7   8  -3    1.93    0.18
  -7   8  -3    1.86    0.13
   0   9   3    0.00    0.02
   0   9  -3    0.01    0.02
   0   9  -3    0.04    0.02
   0   9  -3    0.02    0.02
   0  -9  -3    0.02    0.03
   0   9  -3    0.04    0.02
   0   9  -3   -0.01    0.10
   0  -9   3    0.03    0.03
   0   9   3   -0.02    0.03
   1   9  -3   15.44    1.16
  -1   9   3   16.44    1.16
   1   9  -3   18.87    1.16
   1   9  -3   18.99    1.16
  -1   9   3   16.49    1.16
   1   9   3   15.47    1.16
   1   9   3   18.27    1.16
   1   9   3   17.07    1.16
  -1  -9   3   16.04    1.16
  -1   9  -3   20.49    1.16
  -1   9  -3   17.23    1.16
  -1   9  -3   16.49    1.16
   2   9  -3    4.23    0.28
   2   9  -3    4.73    0.28
  -2   9   3    3.80    0.28
   2   9  -3    4.41    0.29
  -2   9   3    3.92    0.28
   2  -9  -3    4.15    0.28
   2   9   3    3.45    0.28
  -2   9  -3    4.14    0.28
   2   9   3    3.99    0.28
  -2   9  -3    3.73    0.28
   3   9  -3    9.04    0.62
  -3   9   3    8.79    0.62
   3   9  -3    9.77    0.63
  -3   9   3   10.30    0.81
  -3   9  -3    8.49    0.62
   3   9   3    7.90    0.61
  -3   9  -3    9.71    0.62
  -3   9  -3    8.94    0.62
   3   9   3    9.03    0.62
  -4   9   3   30.28    1.81
  -4   9   3   28.45    1.89
  -4   9   3   25.34    1.81
  -4   9   3   25.45    1.81
   4   9  -3   26.47    1.81
   4   9  -3   27.28    1.82
  -4   9  -3   25.55    1.81
  -4   9  -3   31.22    1.89
  -4   9  -3   29.84    1.81
   4   9   3   23.87    1.81
   4  -9  -3   26.77    1.83
   4   9   3   23.36    1.81
   5   9  -3    0.80    0.07
  -5   9   3    0.80    0.17
  -5   9   3    0.71    0.07
  -5   9   3    0.76    0.07
  -5  -9  -3    0.67    0.07
   5   9  -3    0.84    0.10
   5  -9   3    0.64    0.09
   5  -9  -3    0.80    0.09
   5   9   3    0.76    0.06
  -5   9  -3    0.93    0.15
  -6   9   3    4.80    0.34
  -6   9   3    5.13    0.41
   6   9  -3    4.83    0.34
  -6  -9  -3    4.72    0.33
   6  -9   3    4.42    0.34
   6  -9  -3    4.76    0.35
  -6   9  -3    5.62    0.40
  -6  -9   3    4.84    0.33
   7  -9   3    4.60    0.31
   7   9  -3    4.62    0.31
  -7  -9  -3    4.41    0.31
  -7   9   3    5.09    0.37
  -7  -9   3    4.40    0.31
  -7   9  -3    5.15    0.36
   7  -9  -3    3.90    0.31
   7  -9  -3    4.17    0.33
  -7   9  -3    5.09    0.32
   0  10   3    2.82    0.20
   0  10   3    2.67    0.20
   0  10  -3    2.72    0.20
   0  10   3    2.72    0.21
   0  10  -3    2.76    0.19
   0  10  -3    2.98    0.19
  -1  10   3    0.18    0.09
   1  10  -3    0.06    0.03
  -1  10   3    0.03    0.03
  -1  10   3    0.06    0.03
   1  10  -3    0.12    0.04
  -1  10   3    0.08    0.02
   1  10  -3    0.06    0.02
   1  10  -3    0.09    0.02
  -1  10  -3    0.05    0.02
   1  10   3    0.08    0.04
  -1  10  -3    0.11    0.02
  -1  10  -3    0.09    0.03
  -1  10  -3    0.06    0.02
   1  10   3    0.05    0.02
  -2  10   3    3.64    0.25
  -2  10   3    3.59    0.25
   2  10  -3    3.31    0.25
   2  10  -3    4.27    0.26
   2  10  -3    3.88    0.25
  -2  10   3    3.47    0.25
  -2  10  -3    3.54    0.25
  -2  10  -3    3.44    0.25
   2  10   3    3.14    0.25
   2 -10  -3    3.60    0.25
   2  10   3    3.44    0.25
  -2  10  -3    3.97    0.25
   3  10  -3    5.73    0.38
  -3  10   3    5.26    0.36
  -3  10   3    5.58    0.37
  -3  10   3    5.05    0.36
   3  10  -3    5.33    0.36
  -3  10   3    6.21    0.46
   3  10   3    4.54    0.36
   3  10   3    4.88    0.36
   3  10   3    4.62    0.36
  -3  10  -3    5.24    0.36
  -3  10  -3    5.70    0.36
   4  10  -3    0.17    0.05
   4  10  -3    0.16    0.03
  -4  10   3    0.20    0.03
  -4  10   3    0.19    0.03
  -4  10   3    0.25    0.11
  -4  10   3    0.17    0.05
  -4  10  -3    0.20    0.03
   4  10   3    0.14    0.03
   4 -10  -3    0.11    0.04
  -4  10  -3    0.14    0.03
  -5 -10  -3    5.46    0.36
   5  10  -3    5.05    0.37
   5  10  -3    5.29    0.38
  -5  10   3    5.20    0.37
  -5  10  -3    5.59    0.37
  -6 -10  -3    4.93    0.34
   6  10  -3    4.87    0.34
  -6  10   3    5.34    0.40
  -6  10   3    4.94    0.34
   6 -10   3    4.48    0.34
  -6 -10   3    4.64    0.34
  -6  10  -3    5.44    0.34
  -6  10  -3    5.66    0.40
   6 -10  -3    4.58    0.35
  -7  10   3    6.24    0.44
   7 -10   3    5.87    0.41
  -7 -10  -3    5.83    0.40
  -7  10   3    6.33    0.41
  -7  10  -3    6.15    0.41
   7 -10  -3    5.51    0.41
  -7  10  -3    6.12    0.44
   0  11  -3    0.05    0.02
   0  11  -3    0.03    0.03
   0  11  -3    0.04    0.02
   0  11   3    0.00    0.02
   0  11   3    0.04    0.03
   0  11  -3    0.02    0.02
   0  11   3    0.01    0.06
   1  11  -3   12.80    0.94
  -1  11   3   13.67    0.94
   1  11  -3   16.15    0.95
  -1  11   3   13.61    0.94
   1  11  -3   13.88    0.94
  -1  11   3   14.19    0.94
   1  11  -3   15.17    0.94
   1  11   3   15.74    0.95
   1  11   3   12.31    0.94
  -1  11  -3   13.46    0.94
  -1  11  -3   13.52    0.94
  -1  11  -3   13.49    0.94
  -2  11   3    6.45    0.44
   2  11  -3    7.19    0.45
  -2  11   3    6.49    0.44
   2  11  -3    6.46    0.43
  -2  11   3    6.20    0.44
   2  11  -3    7.28    0.44
   2  11  -3    5.84    0.43
  -2  11  -3    6.55    0.44
   2 -11  -3    5.94    0.43
   2  11   3    5.80    0.43
  -2  11  -3    6.20    0.43
  -2  11  -3    6.21    0.44
   3  11  -3    8.07    0.58
  -3  11   3    9.84    0.66
  -3  11   3    8.19    0.58
   3  11  -3    8.70    0.59
  -3  11   3    8.80    0.58
  -3  11   3    8.07    0.58
  -3  11  -3    8.81    0.58
  -3  11  -3    7.87    0.58
  -4  11   3    5.78    0.43
  -4  11   3    5.76    0.43
   4  11  -3    5.84    0.43
   4  11  -3    6.00    0.44
  -4  11   3    7.08    0.43
  -4  11   3    7.16    0.51
  -4  11  -3    6.15    0.43
   4 -11  -3    6.07    0.44
  -4  11  -3    6.67    0.43
   5  11  -3    7.38    0.52
  -5  11   3    7.54    0.52
  -5  11   3    8.68    0.59
  -5  11   3    7.31    0.52
   5  11  -3    6.92    0.53
  -5  11  -3    7.60    0.52
   5 -11  -3    7.01    0.53
   5  11   3    7.05    0.52
  -5  11  -3    8.53    0.53
  -5  11  -3    8.86    0.53
   6  11  -3    3.24    0.23
  -6  11   3    3.75    0.29
  -6 -11  -3    3.31    0.23
   6 -11   3    3.00    0.23
   6 -11  -3    3.01    0.24
  -6  11  -3    3.77    0.28
  -6 -11   3    3.06    0.23
  -6  11  -3    3.74    0.23
   0  12   3    1.39    0.11
   0  12  -3    1.47    0.11
   0  12  -3    1.36    0.11
   0  12   3    1.46    0.11
   0  12  -3    1.31    0.10
   1  12  -3   25.24    1.50
  -1  12   3   22.24    1.49
   1  12  -3   20.38    1.49
   1  12  -3   20.69    1.49
  -1  12   3   21.61    1.49
  -1  12   3   22.08    1.49
   1  12  -3   23.73    1.49
  -1  12  -3   22.25    1.49
   1  12   3   24.83    1.49
   1  12   3   20.14    1.49
  -1  12  -3   21.56    1.49
  -1  12  -3   23.94    1.56
  -1  12  -3   19.53    1.49
  -2  12   3    2.03    0.16
   2  12  -3    1.89    0.15
  -2  12   3    2.10    0.16
   2  12  -3    2.33    0.17
  -2  12   3    2.09    0.16
   2  12  -3    2.29    0.16
   2  12  -3    2.01    0.16
  -2  12  -3    2.49    0.24
  -2  12  -3    1.91    0.15
  -2  12  -3    2.03    0.16
  -2  12  -3    2.50    0.16
   3  12  -3    9.53    0.67
  -3  12   3    9.37    0.66
  -3  12   3   10.08    0.66
   3  12  -3    8.69    0.66
  -3  12   3    9.34    0.66
  -3  12  -3   11.50    0.73
  -3  12  -3    9.18    0.66
  -3  12  -3    9.82    0.66
  -4  12   3    5.35    0.41
  -4  12   3    6.59    0.41
  -4  12   3    6.69    0.48
   4  12  -3    5.32    0.41
   4  12  -3    5.25    0.42
  -4  12  -3    6.30    0.41
  -5  12   3    0.67    0.15
   5  12  -3    0.60    0.05
  -5  12   3    0.61    0.06
  -5  12   3    0.56    0.06
  -5  12   3    0.68    0.06
  -5  12  -3    0.43    0.07
   5 -12  -3    0.51    0.07
  -5  12  -3    0.69    0.12
  -5  12  -3    0.67    0.06
   6 -12   3    5.94    0.43
   6  12  -3    6.88    0.44
  -6 -12  -3    6.49    0.43
  -6  12   3    7.07    0.43
  -6  12   3    6.19    0.47
   6 -12  -3    5.79    0.44
  -6  12  -3    6.83    0.48
  -6  12  -3    6.76    0.44
   6 -12  -3    5.79    0.44
   0  13  -3    3.90    0.30
   0  13  -3    4.16    0.30
   0  13  -3    4.46    0.31
   0  13  -3    5.04    0.31
   0  13   3    4.29    0.31
   0  13   3    4.76    0.31
   1  13  -3    0.21    0.04
  -1  13   3    0.11    0.03
   1  13  -3    0.22    0.03
  -1  13   3    0.12    0.03
   1  13  -3    0.13    0.03
  -1  13   3    0.09    0.03
   1  13  -3    0.12    0.03
  -1  13  -3    0.08    0.02
  -1  13  -3    0.14    0.04
  -1  13  -3    0.09    0.03
   1  13   3    0.14    0.03
  -1  13  -3    0.03    0.03
   2  13  -3   12.25    0.77
   2  13  -3   10.02    0.76
  -2  13   3   11.39    0.76
  -2  13   3   11.20    0.76
   2  13  -3   10.68    0.76
  -2  13   3   11.24    0.76
   2  13  -3   11.83    0.77
  -2  13  -3   10.97    0.76
  -2  13  -3   11.26    0.76
  -2  13  -3   13.02    0.77
   2  13   3    9.86    0.76
  -2  13  -3   11.89    0.83
  -3  13   3   19.06    1.23
  -3  13   3   18.43    1.23
   3  13  -3   16.02    1.23
  -3  13   3   17.32    1.23
  -3  13  -3   20.73    1.24
  -3  13  -3   17.29    1.23
  -3  13  -3   19.41    1.30
  -3  13  -3   18.45    1.23
  -4  13   3    3.92    0.25
  -4  13   3    3.96    0.25
   4  13  -3    3.02    0.24
  -4  13   3    3.38    0.24
  -4  13   3    3.47    0.24
  -4  13  -3    3.68    0.30
  -4  13  -3    3.85    0.25
  -4  13  -3    3.47    0.24
  -4  13  -3    3.23    0.24
   4 -13  -3    2.93    0.25
  -5  13   3    2.22    0.16
  -5  13   3    2.45    0.16
   5 -13   3    1.86    0.16
   5  13  -3    2.09    0.15
  -5  13  -3    2.53    0.16
   5 -13  -3    1.93    0.16
  -5  13  -3    2.43    0.21
  -5  13  -3    2.32    0.17
   6 -13   3    2.94    0.21
  -6  13  -3    3.20    0.21
   6 -13  -3    2.84    0.21
   0  14   3    5.15    0.38
   0  14   3    5.93    0.38
   0  14  -3    5.61    0.38
   0  14  -3    5.28    0.38
   0  14  -3    5.85    0.39
   1  14  -3    2.06    0.17
   1  14  -3    2.38    0.18
  -1  14   3    2.43    0.18
   1  14  -3    2.57    0.19
   1  14  -3    2.63    0.18
  -1  14   3    2.54    0.18
  -1  14  -3    2.46    0.18
  -1  14  -3    2.45    0.18
   1  14   3    2.27    0.18
  -1  14  -3    2.66    0.18
   1  14   3    2.92    0.19
  -2  14   3    2.95    0.21
  -2  14   3    2.99    0.21
   2  14  -3    2.76    0.21
   2  14  -3    3.10    0.22
  -2  14  -3    2.84    0.21
  -2  14  -3    2.88    0.21
  -2  14  -3    3.18    0.21
   3  14  -3    0.82    0.07
   3  14  -3    0.83    0.10
  -3  14   3    1.09    0.08
  -3  14   3    0.97    0.08
  -3  14   3    1.02    0.08
  -3  14   3    1.07    0.09
  -3  14  -3    0.94    0.15
  -3  14  -3    0.93    0.08
  -3  14  -3    1.05    0.08
  -3  14  -3    1.05    0.08
   3 -14  -3    0.86    0.09
  -4  14   3    1.98    0.14
  -4  14   3    1.87    0.13
   4  14  -3    1.65    0.13
  -4  14   3    1.93    0.14
   4 -14  -3    1.52    0.14
  -4  14  -3    1.98    0.13
  -4  14  -3    1.94    0.13
  -4  14  -3    1.85    0.18
  -4  14  -3    1.82    0.13
   5 -14   3    1.16    0.09
  -5  14   3    1.31    0.10
   5  14  -3    1.29    0.09
  -5  14   3    1.15    0.10
  -5  14  -3    1.42    0.10
   0  15  -3    4.23    0.31
   0  15  -3    4.33    0.31
   0  15   3    4.62    0.30
   0  15  -3    4.21    0.31
  -1  15   3    2.70    0.19
   1  15  -3    2.83    0.19
  -1  15   3    2.75    0.19
   1  15  -3    2.54    0.19
   1  15  -3    2.65    0.20
  -1  15  -3    2.67    0.19
  -1  15  -3    2.66    0.19
  -1  15  -3    2.68    0.19
   1  15   3    2.49    0.19
   2  15  -3    8.60    0.56
  -2  15   3    8.32    0.56
  -2  15   3    8.72    0.56
   2  15  -3    7.60    0.57
  -2  15  -3    8.29    0.56
  -2  15  -3    8.51    0.56
   2  15   3    7.97    0.56
  -2  15  -3    8.21    0.56
  -3  15   3    8.56    0.53
  -3  15   3    8.46    0.53
   3  15  -3    6.68    0.52
  -3  15  -3    8.07    0.53
   3 -15  -3    6.77    0.53
  -3  15  -3    7.85    0.53
  -3  15  -3    8.03    0.53
  -4  15   3    3.35    0.21
   4  15  -3    2.49    0.20
  -4  15   3    2.99    0.20
  -4  15  -3    2.99    0.20
  -4  15  -3    2.93    0.20
  -5  15  -3    1.55    0.11
   5 -15  -3    1.48    0.11
   0  16   3    4.07    0.28
   0  16   3    4.54    0.28
   0  16  -3    3.81    0.27
   0  16  -3    3.63    0.28
   0  16  -3    3.97    0.27
  -1  16   3    0.21    0.03
  -1  16   3    0.11    0.02
   1  16  -3    0.12    0.03
   1  16  -3    0.16    0.04
   1  16   3    0.13    0.02
  -1  16  -3    0.21    0.03
  -1  16  -3    0.16    0.03
  -1  16  -3    0.13    0.02
  -2  16   3    0.91    0.07
  -2  16   3    0.87    0.07
  -2  16  -3    0.94    0.07
  -2  16  -3    0.89    0.07
  -2  16  -3    0.82    0.07
   2  16   3    0.80    0.07
   3 -16   3    3.21    0.26
  -3  16   3    4.10    0.26
  -3  16   3    4.05    0.26
  -3  16  -3    3.86    0.26
  -3  16  -3    3.95    0.26
  -3  16  -3    3.62    0.26
  -4  16   3    0.59    0.05
  -4  16  -3    0.55    0.05
  -4  16  -3    0.69    0.06
   0  17  -3    0.39    0.06
   0  17   3    0.42    0.04
   0  17   3    0.46    0.06
   0  17  -3    0.43    0.04
   0  17  -3    0.44    0.04
  -1  17   3    0.57    0.05
   1  17  -3    0.70    0.06
   1  17  -3    0.61    0.06
  -1  17   3    0.76    0.06
  -1  17  -3    0.65    0.05
   1  17   3    0.60    0.06
  -1  17  -3    0.69    0.05
  -2  17   3    1.59    0.11
  -2  17   3    1.62    0.11
  -2  17  -3    1.54    0.11
  -2  17  -3    1.32    0.11
  -2  17  -3    1.61    0.11
  -3  17   3   11.55    0.73
  -3  17   3   10.48    0.73
  -3  17  -3   10.89    0.73
  -3  17  -3   10.65    0.73
  -3  17  -3   11.01    0.74
   0  18  -3   -0.01    0.02
   0  18  -3    0.02    0.02
   0  18   3   -0.01    0.02
  -1  18   3    1.34    0.09
  -1  18  -3    1.29    0.09
  -1  18  -3    1.25    0.09
  -2  18   3    2.12    0.14
  -2  18  -3    2.02    0.14
  -2  18  -3    2.03    0.14
   0   0  -4   -0.14    0.25
   0   0   4    0.07    0.30
   1   0   4   29.59    1.88
   1   0  -4   31.69    1.88
   1   0   4   26.92    2.13
  -1   0  -4   25.22    1.89
  -1   0   4   24.24    1.87
   1   0  -4   30.73    2.17
  -2   0  -4   27.83    2.21
   2   0   4   32.14    2.20
  -2   0  -4   34.18    2.48
   2   0  -4   33.54    2.62
  -2   0   4   37.88    2.51
  -2   0   4   33.11    2.20
   2   0  -4   34.57    2.22
   2   0   4   30.87    2.21
   3   0  -4    1.35    0.94
   3   0  -4    0.67    0.10
  -3   0  -4    0.57    0.09
   3   0   4    0.64    0.05
  -3   0  -4    0.83    0.67
   3   0   4    0.65    0.08
  -3   0  -4    0.80    0.86
  -3   0   4    0.43    0.67
  -3   0   4    0.67    0.05
   4   0   4    0.66    0.06
  -4   0  -4    0.58    0.05
  -4   0   4    0.65    0.08
   4   0  -4    0.61    0.06
  -4   0   4    0.55    0.05
  -4   0  -4    0.46    0.18
  -4   0  -4    0.51    0.15
   4   0  -4    0.58    0.08
   4   0  -4    0.58    0.07
   4   0   4    0.59    0.06
   4   0   4    0.62    0.06
  -5   0  -4   22.93    1.73
  -5   0   4   25.77    1.67
   5   0  -4   23.66    1.68
   5   0   4   25.72    1.68
   5   0   4   26.22    1.67
  -5   0   4   22.30    1.76
  -5   0  -4   25.73    1.67
   5   0  -4   26.60    1.69
   5   0   4   25.48    1.67
   6   0  -4   32.76    1.96
   6   0   4   31.37    1.97
   6   0  -4   29.01    1.98
   6   0   4   31.97    1.97
   6   0  -4   27.43    1.97
   6   0   4   30.70    1.97
  -6   0   4   29.25    1.96
  -6   0   4   24.73    2.06
  -6   0  -4   25.89    2.02
  -6   0  -4   29.82    1.96
   7   0   4    0.02    0.03
   7   0   4    0.01    0.03
   7   0  -4    0.03    0.03
  -7   0  -4   -0.01    0.01
  -7   0   4    0.04    0.09
   7   0  -4    0.02    0.03
   7   0   4    0.02    0.03
  -7   0   4   -0.02    0.02
   8   0  -4    0.36    0.05
  -8   0   4    0.23    0.10
   8   0  -4    0.27    0.04
   0  -1  -4   82.03    6.06
   0   1   4   93.32    6.09
  -1  -1  -4   39.87    2.81
   1  -1   4   39.33    2.80
   1  -1   4   36.76    3.01
   1   1  -4   47.85    3.07
   1  -1  -4   44.96    3.09
   1   1   4   41.82    3.05
   1  -1  -4   42.41    2.80
  -2  -1  -4    7.62    1.11
  -2   1   4    9.58    0.97
  -2  -1  -4    9.68    0.99
   2  -1   4    8.73    0.57
  -2  -1  -4    7.69    0.59
   2  -1   4    8.16    0.59
   2   1  -4    8.30    1.09
   2   1  -4    8.75    0.60
  -2   1   4    8.60    0.58
  -2  -1   4    9.67    0.58
   2  -1  -4    9.21    0.60
  -2   1  -4    7.36    1.09
   2   1   4    8.39    0.57
  -2   1  -4    7.18    0.59
  -2  -1   4   10.27    0.95
   2   1   4    8.88    0.59
  -2   1  -4    8.03    0.92
   2  -1  -4    7.83    1.16
   3  -1   4   21.22    1.48
  -3   1   4   20.48    2.03
  -3   1   4   23.39    1.46
  -3  -1  -4   19.70    1.48
   3   1  -4   22.68    1.49
   3   1  -4   22.12    2.40
   3  -1   4   22.37    1.46
  -3  -1  -4   19.69    2.27
   3  -1  -4   23.83    1.50
  -3   1  -4   18.15    2.27
  -3  -1   4   24.91    1.46
   3   1   4   22.99    1.48
  -3   1  -4   20.16    1.49
  -3   1  -4   19.36    2.04
   3  -1  -4   20.94    2.49
   4  -1   4    2.18    0.16
   4   1  -4    2.39    0.17
   4   1  -4    2.18    0.17
   4   1  -4    1.96    0.16
   4   1  -4    2.45    0.16
   4  -1   4    2.12    0.16
  -4   1   4    2.24    0.16
   4  -1   4    2.13    0.16
  -4   1   4    2.14    0.17
  -4  -1  -4    2.20    0.15
   4   1   4    2.20    0.16
  -4   1  -4    2.01    0.24
   4  -1  -4    2.52    0.16
  -4  -1   4    2.36    0.16
  -4   1  -4    2.40    0.15
  -4   1  -4    1.97    0.24
   4  -1  -4    1.99    0.16
   4   1   4    2.20    0.16
   4   1   4    2.22    0.16
   4  -1  -4    2.20    0.17
  -4  -1   4    2.46    0.16
   5  -1   4   13.52    0.90
   5  -1   4   13.38    0.90
  -5   1   4   13.51    0.90
   5   1  -4   13.30    0.91
  -5  -1  -4   11.88    0.96
  -5   1   4   11.37    0.99
  -5  -1  -4   13.37    0.90
   5  -1   4   12.98    0.91
  -5   1   4   12.72    0.90
   5   1  -4   12.51    0.90
   5   1  -4   14.22    0.90
   5   1   4   13.97    0.91
   5  -1  -4   12.32    0.90
  -5   1  -4   13.92    0.90
   5  -1  -4   14.02    0.91
  -5  -1   4   13.51    0.90
   5  -1  -4   15.38    0.90
   5   1   4   14.13    0.90
   5   1   4   13.88    0.90
  -6  -1  -4   30.04    2.04
  -6   1   4   25.75    2.14
   6   1  -4   30.15    2.06
   6  -1   4   31.61    2.05
  -6   1   4   30.52    2.05
   6   1  -4   27.98    2.05
   6  -1   4   30.18    2.05
   6   1  -4   32.41    2.05
   6  -1   4   32.40    2.05
   6  -1  -4   30.45    2.06
  -6  -1   4   29.96    2.05
  -6   1  -4   31.67    2.04
   6   1   4   33.60    2.06
   6  -1  -4   28.02    2.05
   6   1   4   34.08    2.05
   6   1   4   32.34    2.05
  -6   1  -4   28.13    2.10
   7  -1   4    1.29    0.10
   7   1  -4    1.29    0.11
   7  -1   4    1.46    0.10
   7   1  -4    1.14    0.10
  -7  -1  -4    1.18    0.09
   7  -1   4    1.46    0.10
  -7   1   4    1.31    0.09
  -7   1   4    1.09    0.19
   7  -1  -4    1.24    0.11
  -7   1  -4    1.15    0.18
   7  -1  -4    1.14    0.10
   7   1   4    1.23    0.10
  -7  -1   4    1.08    0.19
  -7  -1   4    1.22    0.09
  -7   1  -4    1.15    0.09
   8   1  -4    3.72    0.25
   8   1  -4    3.45    0.24
   8  -1  -4    3.34    0.24
   8  -1  -4    3.44    0.24
   0  -2  -4  325.07   25.97
   0   2  -4  411.05   25.97
   0   2   4  422.17   26.02
  -1  -2  -4   35.24    2.30
   1  -2   4   32.08    2.29
   1  -2  -4   37.25    2.62
   1   2   4   36.18    2.58
   1   2   4   31.06    2.28
   1  -2  -4   34.00    2.29
  -2  -2  -4    6.22    0.47
   2  -2   4    5.85    0.47
   2   2  -4    7.58    0.46
  -2  -2  -4    7.95    0.92
   2   2  -4    6.38    0.97
   2  -2   4    6.32    0.45
  -2   2   4    7.43    0.92
  -2   2   4    6.73    0.45
  -2   2  -4    5.53    0.99
   2  -2  -4    6.99    1.14
   2   2   4    6.59    0.45
   2   2   4    7.14    0.45
   3  -2   4   13.47    0.88
  -3   2   4   13.71    0.88
   3   2  -4   13.22    0.91
  -3   2   4   12.24    1.63
   3  -2   4   12.44    0.90
  -3  -2  -4   11.78    0.90
   3   2   4   14.45    0.90
   3  -2  -4   13.22    0.88
  -3   2  -4   11.49    0.90
   3  -2  -4   14.16    0.92
  -3   2  -4   11.57    1.67
   3  -2  -4   14.85    2.26
  -4   2   4    6.17    0.56
   4   2  -4    7.32    0.49
   4  -2   4    6.43    0.49
   4  -2   4    6.61    0.48
   4  -2   4    6.69    0.48
   4   2  -4    6.86    0.49
  -4   2   4    6.71    0.48
   4   2  -4    6.33    0.48
  -4  -2  -4    6.85    0.48
   4   2  -4    7.84    0.48
  -4   2   4    7.27    0.48
   4  -2  -4    7.84    0.50
   4   2   4    7.80    0.48
   4   2   4    7.61    0.48
   4   2   4    7.57    0.48
   4   2   4    7.72    0.49
  -4   2  -4    6.19    0.54
  -4  -2   4    7.47    0.48
  -4   2  -4    6.61    0.54
  -4   2  -4    8.04    0.48
   5   2  -4    5.97    0.38
   5   2  -4    5.03    0.38
   5  -2   4    5.27    0.39
   5  -2   4    5.43    0.38
   5  -2   4    5.41    0.38
   5   2  -4    5.60    0.39
  -5   2   4    5.44    0.38
  -5  -2  -4    5.38    0.38
   5   2  -4    5.53    0.40
   5  -2  -4    5.03    0.39
   5   2   4    5.97    0.39
  -5   2  -4    5.25    0.45
   5  -2  -4    5.81    0.40
  -5  -2   4    5.61    0.38
   5   2   4    6.09    0.38
   5   2   4    6.03    0.38
  -5   2  -4    6.13    0.38
   6   2  -4    1.93    0.16
   6  -2   4    2.21    0.16
   6  -2   4    2.20    0.16
  -6   2   4    2.10    0.15
   6   2  -4    2.08    0.16
  -6   2   4    1.84    0.26
  -6  -2  -4    2.12    0.15
   6  -2   4    2.04    0.16
   6   2  -4    2.26    0.15
   6  -2  -4    1.95    0.16
  -6  -2   4    2.03    0.15
   6  -2  -4    2.20    0.17
   6   2   4    2.47    0.16
  -6   2  -4    1.95    0.23
   6   2   4    2.27    0.16
  -6   2  -4    2.22    0.15
   7   2  -4    1.34    0.10
  -7   2   4    1.30    0.10
  -7   2   4    1.18    0.20
   7  -2   4    1.42    0.10
   7   2  -4    1.51    0.11
   7  -2   4    1.56    0.11
  -7  -2  -4    1.33    0.09
   7   2   4    1.31    0.11
  -7   2  -4    1.35    0.17
  -7  -2   4    1.29    0.10
  -7  -2   4    1.13    0.20
   7  -2  -4    1.22    0.11
   7  -2  -4    1.42    0.12
   8  -2   4   12.53    0.93
  -8   2   4   13.30    1.06
   8  -2  -4   14.96    0.94
  -8  -2   4   14.48    0.93
  -8  -2   4   12.91    1.02
   8  -2  -4   15.30    0.94
   0   3   4  282.85   18.97
   0   3  -4  278.30   18.91
   1  -3   4   38.61    2.66
  -1   3   4   34.50    2.65
  -1  -3  -4   45.04    2.67
   1  -3  -4   34.75    2.65
   1   3   4   35.00    2.65
   1  -3  -4   45.46    2.66
   1  -3  -4   44.89    3.02
   2  -3   4    8.74    0.59
  -2  -3  -4    9.27    0.60
  -2   3  -4    7.44    1.13
  -2   3  -4    7.79    0.60
  -2   3  -4    8.92    1.03
   2  -3  -4    8.90    0.58
   2  -3  -4    9.21    1.34
   3  -3   4    1.56    0.11
  -3   3   4    1.56    0.11
   3   3  -4    1.52    0.15
  -3  -3  -4    1.27    0.14
   3  -3   4    1.23    0.18
   3  -3  -4    1.56    0.17
   3  -3  -4    1.48    0.10
  -3   3  -4    0.62    0.91
  -3   3  -4    1.36    0.15
   4  -3   4    4.75    0.37
   4  -3   4    5.05    0.36
  -4   3   4    4.58    0.44
   4   3  -4    5.35    0.37
   4   3  -4    5.78    0.36
   4   3  -4    5.27    0.37
  -4   3   4    5.31    0.36
   4   3  -4    4.68    0.36
  -4   3   4    5.17    0.36
  -4  -3  -4    4.87    0.36
   4  -3   4    5.10    0.37
   4   3   4    5.78    0.36
   4  -3  -4    4.59    0.37
  -4  -3   4    5.23    0.36
   4   3   4    6.01    0.37
  -4   3  -4    5.06    0.42
   4   3   4    5.61    0.36
  -4   3  -4    6.04    0.36
   4   3   4    5.47    0.36
   4  -3  -4    5.81    0.38
   5   3  -4    0.76    0.08
   5  -3   4    0.89    0.08
  -5   3   4    0.74    0.17
   5   3  -4    0.92    0.10
  -5  -3  -4    0.83    0.07
   5  -3   4    0.83    0.08
   5   3  -4    0.98    0.09
   5  -3   4    0.80    0.08
  -5   3   4    0.85    0.09
   5   3  -4    0.91    0.07
  -5   3   4    0.83    0.07
   5  -3  -4    0.79    0.09
  -5   3  -4    0.82    0.15
   5   3   4    0.93    0.07
   5  -3  -4    0.84    0.09
   5   3   4    0.90    0.07
  -5   3  -4    0.97    0.07
   5   3   4    0.88    0.08
  -5  -3   4    0.83    0.07
  -6  -3  -4    4.29    0.30
   6   3  -4    4.77    0.31
   6   3  -4    4.34    0.31
  -6   3   4    4.33    0.31
   6  -3   4    4.94    0.31
   6  -3   4    4.27    0.31
  -6   3   4    4.52    0.30
  -6   3   4    3.94    0.40
   6  -3   4    4.60    0.31
   6   3  -4    4.67    0.31
   6   3   4    4.64    0.31
  -6   3  -4    4.11    0.30
  -6  -3   4    4.43    0.30
   6  -3  -4    4.58    0.32
  -6   3  -4    4.40    0.38
  -6  -3   4    3.87    0.41
   6  -3  -4    4.23    0.31
   7   3  -4    5.30    0.35
   7  -3   4    5.53    0.35
  -7   3   4    4.55    0.43
   7   3  -4    5.70    0.35
  -7  -3  -4    4.88    0.34
   7  -3   4    5.20    0.35
   7   3  -4    5.11    0.35
   7  -3  -4    4.80    0.36
   7   3   4    4.77    0.35
  -7   3  -4    5.14    0.40
  -7  -3   4    4.96    0.35
   7  -3  -4    4.85    0.35
  -8  -3  -4    4.73    0.33
   8  -3   4    4.42    0.34
  -8   3   4    5.19    0.43
  -8  -3   4    5.04    0.33
   8  -3  -4    5.27    0.36
   8  -3  -4    5.14    0.35
   0  -4  -4    9.72    1.13
   0  -4   4   12.51    0.83
   0  -4  -4   13.83    0.84
  -1  -4  -4   19.60    1.19
   1  -4   4   17.79    1.18
   1   4  -4   18.34    1.41
   1  -4   4   16.32    1.18
   1   4   4   18.98    1.58
  -1   4  -4   14.75    1.45
   1  -4  -4   16.61    1.62
   2  -4   4    9.58    0.66
   2   4  -4    9.60    0.66
  -2  -4  -4    8.84    1.27
  -2  -4  -4   10.20    0.67
   2  -4   4   10.21    0.65
   2  -4  -4   10.89    0.68
   2  -4  -4    9.77    0.65
  -2   4  -4    8.31    0.67
   2  -4  -4    8.70    1.46
  -2   4  -4    6.93    1.69
  -2   4  -4    9.72    1.15
  -3  -4  -4    1.92    0.18
   3  -4   4    2.08    0.18
  -3   4   4    1.84    0.15
   3  -4   4    2.16    0.15
   3   4  -4    1.73    0.15
  -3   4   4    2.10    0.15
   3   4  -4    2.29    0.15
   3   4  -4    2.08    0.16
  -3   4   4    1.86    0.24
   3  -4  -4    2.28    0.22
  -3   4  -4    2.05    0.21
   3  -4  -4    2.12    0.14
   4  -4   4    2.43    0.19
   4   4  -4    2.17    0.17
  -4   4   4    2.22    0.26
   4   4  -4    2.50    0.19
  -4   4   4    2.38    0.18
   4  -4   4    2.09    0.18
  -4   4   4    2.59    0.17
  -4  -4  -4    2.32    0.17
   4   4  -4    2.53    0.19
   4   4  -4    2.69    0.18
   4   4   4    2.53    0.17
   4  -4  -4    2.66    0.19
  -4   4  -4    2.77    0.17
  -4   4  -4    2.38    0.24
   4   4   4    2.69    0.17
   4  -4  -4    2.12    0.18
  -4  -4   4    2.45    0.18
   5   4  -4    1.04    0.08
  -5   4   4    1.03    0.09
  -5   4   4    1.01    0.08
   5   4  -4    1.08    0.09
   5   4  -4    0.98    0.08
   5   4  -4    1.02    0.10
   5  -4   4    0.93    0.09
   5  -4   4    1.14    0.10
  -5   4   4    0.88    0.18
  -5  -4  -4    0.95    0.08
   5  -4   4    1.00    0.09
   5  -4  -4    0.82    0.09
   5   4   4    1.03    0.08
   5   4   4    0.97    0.08
  -5  -4   4    1.04    0.08
   5  -4  -4    1.07    0.11
  -5   4  -4    1.00    0.16
   6  -4   4    1.11    0.10
   6  -4   4    1.39    0.10
   6   4  -4    1.42    0.11
  -6   4   4    1.30    0.11
  -6   4   4    1.08    0.20
   6   4  -4    1.28    0.10
  -6  -4  -4    1.16    0.09
   6   4  -4    1.22    0.10
   6  -4   4    1.26    0.10
   6  -4  -4    1.29    0.12
   6  -4  -4    1.09    0.11
   6   4   4    1.22    0.10
  -6   4  -4    1.23    0.18
  -6  -4   4    1.06    0.21
  -6  -4   4    1.20    0.10
   7   4  -4    8.12    0.53
   7  -4   4    7.87    0.53
   7   4  -4    8.43    0.52
  -7   4   4    6.73    0.60
  -7  -4  -4    7.64    0.52
   7  -4   4    8.29    0.53
  -7  -4   4    7.68    0.52
   7  -4  -4    7.34    0.54
  -7   4  -4    8.08    0.58
   7  -4  -4    7.34    0.53
   8  -4   4    1.70    0.14
  -8   4   4    1.98    0.20
  -8  -4  -4    2.00    0.13
  -8  -4   4    1.87    0.13
   8  -4  -4    1.79    0.14
   8  -4  -4    2.28    0.14
   0   5  -4  300.65   21.11
   0   5   4  325.82   21.21
   1  -5   4   40.33    2.50
   1  -5  -4   35.33    3.17
   1  -5  -4   37.41    2.50
   1   5   4   35.72    2.49
  -2   5   4   53.33    3.47
   2  -5   4   50.77    3.48
  -2  -5  -4   49.72    3.48
   2  -5   4   52.63    3.47
   2  -5  -4   56.54    3.50
   2  -5  -4   47.88    3.46
  -3  -5  -4   17.38    1.28
  -3   5   4   15.77    1.31
   3   5  -4   19.96    1.25
   3  -5   4   18.80    1.25
  -3   5   4   17.15    1.24
   3   5  -4   19.35    1.25
   3  -5  -4   18.99    1.30
  -3   5  -4   20.23    1.25
   3   5   4   16.43    1.24
  -3   5  -4   18.71    1.29
   3   5   4   21.09    1.24
   4  -5   4    0.50    0.08
   4   5  -4    0.40    0.05
   4   5  -4    0.56    0.08
  -4  -5  -4    0.52    0.06
  -4   5   4    0.53    0.06
   4   5  -4    0.51    0.08
  -4   5   4    0.56    0.06
   4   5  -4    0.57    0.06
  -4   5   4    0.44    0.15
  -4   5  -4    0.49    0.12
  -4   5  -4    0.57    0.08
   4  -5  -4    0.63    0.08
   4   5   4    0.57    0.06
   4   5   4    0.50    0.05
   4  -5  -4    0.56    0.09
  -5   5   4    0.65    0.17
   5  -5   4    0.79    0.09
   5   5  -4    0.85    0.08
   5   5  -4    0.73    0.07
   5  -5   4    0.64    0.08
  -5   5   4    0.77    0.07
  -5  -5  -4    0.61    0.06
   5   5  -4    0.71    0.09
   5  -5   4    0.64    0.07
   5   5  -4    0.59    0.07
   5   5   4    0.78    0.07
   5  -5  -4    0.77    0.09
   5   5   4    0.73    0.06
   5  -5  -4    0.78    0.09
  -5  -5   4    0.76    0.07
  -5   5  -4    0.70    0.14
  -6   5   4    1.51    0.13
   6  -5   4    1.55    0.13
  -6  -5  -4    1.59    0.12
  -6   5   4    1.59    0.22
   6  -5   4    1.70    0.13
   6  -5   4    2.01    0.13
   6   5  -4    1.68    0.12
   6   5  -4    1.82    0.12
   6  -5  -4    1.57    0.13
   6  -5  -4    1.79    0.15
  -6   5  -4    1.73    0.20
  -6  -5   4    1.61    0.12
   6   5   4    1.72    0.13
   6  -5  -4    1.49    0.13
  -6  -5   4    1.44    0.24
   7  -5   4   10.44    0.69
   7  -5   4   11.02    0.69
   7   5  -4   10.33    0.69
  -7  -5  -4   10.31    0.69
  -7   5   4    9.58    0.76
  -7  -5   4    9.97    0.69
   7  -5  -4    9.74    0.69
  -7   5  -4   10.91    0.74
   7  -5  -4    9.58    0.70
  -8   5   4    0.48    0.12
  -8  -5  -4    0.51    0.04
  -8  -5   4    0.40    0.04
   8  -5  -4    0.51    0.06
   8  -5  -4    0.47    0.05
   0  -6  -4    2.31    0.64
   0   6   4    1.76    0.13
   0  -6  -4    1.90    0.13
   0   6  -4    1.52    0.36
   0  -6   4    2.05    0.13
   1  -6   4   49.92    2.86
   1  -6   4   41.61    2.85
  -1   6   4   40.19    2.85
   1   6   4   39.78    2.85
   1  -6  -4   37.24    2.85
   1  -6  -4   46.92    2.88
   2  -6   4   10.79    0.72
   2   6  -4   12.02    0.72
  -2  -6  -4    9.45    0.72
  -2   6   4    9.92    0.70
   2   6  -4   11.39    0.70
  -2   6   4    8.96    0.70
   2  -6   4   10.38    0.70
   2  -6  -4   11.07    0.72
   2  -6  -4   10.69    0.74
   2  -6  -4    9.40    0.70
   3   6  -4    3.72    0.27
  -3   6   4    3.28    0.34
  -3   6   4    3.53    0.25
   3   6   4    4.13    0.25
  -3   6  -4    3.33    0.25
  -3   6  -4    3.97    0.25
   3   6   4    3.27    0.25
  -3   6  -4    3.91    0.31
   4   6  -4    0.68    0.06
   4   6  -4    0.76    0.07
  -4   6   4    0.73    0.19
   4   6  -4    0.82    0.10
  -4   6   4    0.73    0.07
   4  -6   4    0.64    0.09
  -4  -6  -4    0.58    0.07
  -4   6  -4    0.78    0.13
   4  -6  -4    0.73    0.10
  -4   6  -4    0.73    0.08
   4   6   4    0.66    0.07
   4   6   4    0.90    0.07
  -5   6   4    2.36    0.28
   5   6  -4    2.50    0.20
  -5  -6  -4    2.32    0.17
   5   6  -4    2.41    0.18
  -5   6   4    2.57    0.18
   5  -6   4    2.31    0.18
   5  -6   4    2.75    0.20
   5  -6   4    2.26    0.19
   5   6  -4    2.79    0.18
   5  -6  -4    2.12    0.19
  -5   6  -4    2.67    0.26
   5   6   4    2.52    0.18
   5  -6  -4    2.85    0.20
  -5  -6   4    2.49    0.18
   5   6   4    2.72    0.18
  -6   6   4    5.00    0.45
   6   6  -4    5.64    0.36
  -6  -6  -4    5.09    0.35
   6  -6   4    5.06    0.36
   6   6   4    4.70    0.36
  -6   6  -4    5.78    0.43
  -6  -6   4    5.00    0.36
   6  -6  -4    5.35    0.37
   7   6  -4   11.56    0.81
  -7  -6  -4   12.24    0.81
   7  -6   4   11.87    0.81
  -7   6   4   11.35    0.87
   7  -6   4   13.80    0.82
  -7  -6   4   11.68    0.81
   7  -6  -4   11.19    0.82
  -7   6  -4   13.11    0.86
   7  -6  -4   11.75    0.82
  -8   6   4    1.60    0.16
   8  -6  -4    1.47    0.11
  -8  -6   4    1.36    0.10
   0  -7  -4   25.89    1.76
   0  -7   4   26.62    1.76
  -1   7   4    3.04    0.23
  -1  -7  -4    3.68    0.25
   1  -7   4    3.36    0.23
  -1   7  -4    3.05    0.23
   1  -7  -4    3.65    0.27
   1  -7  -4    3.11    0.23
  -1  -7   4    3.46    0.23
   2   7  -4    8.20    0.52
  -2  -7  -4    6.56    0.53
  -2   7   4    7.19    0.52
   2   7  -4    7.97    0.52
  -2   7   4    6.75    0.52
   2   7  -4    7.88    0.53
  -2   7  -4    8.76    0.57
   2   7   4    8.54    0.52
  -2  -7   4    7.48    0.51
  -2   7  -4    7.01    0.52
  -2   7  -4    7.38    0.52
  -3   7   4    9.98    0.67
   3   7  -4    9.82    0.68
   3   7  -4   11.19    0.67
  -3   7   4    8.86    0.66
   3   7  -4   10.31    0.66
  -3   7   4    8.83    0.74
  -3   7  -4   10.37    0.66
  -3   7  -4   10.61    0.72
   3   7   4    8.47    0.66
   3   7   4   10.74    0.66
  -3   7  -4    8.94    0.66
  -4   7   4    1.46    0.21
   4   7  -4    1.59    0.14
  -4   7   4    1.39    0.12
   4   7  -4    1.57    0.12
   4   7   4    1.41    0.11
  -4   7  -4    1.27    0.14
   4   7   4    1.63    0.12
  -4   7  -4    1.70    0.19
  -4   7  -4    1.74    0.12
   5  -7   4    3.89    0.31
  -5  -7  -4    4.35    0.30
   5   7  -4    4.56    0.32
  -5   7   4    4.50    0.41
  -5   7   4    4.60    0.31
   5  -7   4    3.94    0.31
   5   7  -4    4.87    0.31
   5  -7  -4    3.80    0.32
  -5  -7   4    4.27    0.31
   5  -7  -4    4.96    0.33
  -5   7  -4    5.15    0.39
   5   7   4    4.35    0.30
   5   7   4    4.55    0.31
   6   7  -4    1.38    0.12
  -6   7   4    1.60    0.12
  -6  -7  -4    1.54    0.11
   6  -7   4    1.48    0.12
   6  -7  -4    1.67    0.16
  -6  -7   4    1.21    0.32
   6  -7  -4    1.54    0.13
  -6  -7   4    1.41    0.11
   7  -7   4    3.66    0.25
   7   7  -4    3.48    0.25
  -7  -7  -4    3.78    0.25
  -7   7   4    3.66    0.31
  -7   7  -4    4.05    0.30
  -7   7  -4    3.91    0.25
   7  -7  -4    3.44    0.26
   7  -7  -4    3.30    0.27
  -7  -7   4    3.65    0.25
   0  -8  -4    2.38    0.20
   0   8   4    2.11    0.17
   0   8  -4    2.74    0.17
   0   8  -4    2.22    0.17
   0  -8  -4    2.40    0.16
   0   8   4    2.17    0.17
   0  -8   4    2.41    0.17
  -1   8   4   16.41    1.17
   1   8  -4   15.74    1.17
  -1  -8  -4   19.16    1.19
   1   8  -4   19.17    1.18
   1   8  -4   20.23    1.17
  -1   8   4   16.43    1.17
   1   8   4   15.53    1.17
   1  -8  -4   17.11    1.17
  -1   8  -4   16.90    1.17
  -1  -8   4   17.58    1.17
   1   8   4   18.73    1.18
  -1   8  -4   16.76    1.17
   2   8  -4   16.67    1.10
   2   8  -4   17.05    1.09
  -2   8   4   15.04    1.09
  -2   8   4   14.52    1.09
   2   8  -4   17.26    1.09
   2  -8  -4   16.08    1.09
   2   8   4   16.94    1.09
  -2   8  -4   15.97    1.09
   2   8   4   17.89    1.09
  -2   8  -4   14.60    1.09
   3   8  -4   11.87    0.71
  -3   8   4    9.96    0.79
  -3   8   4   11.01    0.71
   3   8  -4    9.99    0.72
  -3   8  -4    9.75    0.71
   3   8   4    8.91    0.71
  -3   8  -4   11.17    0.71
   3   8   4   11.35    0.71
   4   8  -4   15.30    1.02
  -4   8   4   14.74    1.10
   4   8  -4   14.85    1.03
  -4   8   4   14.44    1.02
  -4   8  -4   17.35    1.10
   4   8   4   15.14    1.02
   4   8   4   13.38    1.02
  -4   8  -4   14.60    1.02
  -4   8  -4   16.57    1.02
  -5  -8  -4   10.82    0.73
  -5   8   4   10.85    0.74
   5  -8   4    9.41    0.74
   5   8  -4   11.76    0.74
  -5   8   4   11.24    0.83
  -5   8   4   11.01    0.74
   5   8  -4   11.40    0.75
   5   8   4   10.78    0.74
   5  -8  -4   11.87    0.76
   5   8   4   10.36    0.74
  -5  -8   4   10.65    0.74
  -6   8   4   10.19    0.69
  -6   8   4   10.09    0.76
   6  -8   4    9.44    0.69
   6   8  -4   10.35    0.69
  -6   8   4   10.08    0.69
  -6  -8  -4   10.09    0.68
   6  -8  -4   10.03    0.70
  -6   8  -4   11.53    0.76
  -6  -8   4    9.81    0.69
   7   8  -4    5.48    0.39
  -7  -8  -4    5.90    0.39
   7  -8   4    5.78    0.39
  -7   8   4    5.96    0.44
   7  -8  -4    5.33    0.40
  -7   8  -4    6.19    0.43
  -7  -8   4    5.58    0.39
  -7   8  -4    5.80    0.39
   0  -9  -4    1.04    0.08
   0   9  -4    0.95    0.08
   0   9   4    0.97    0.08
   0   9  -4    1.12    0.08
   0   9   4    0.90    0.11
   0   9  -4    0.97    0.08
   1   9  -4    0.62    0.05
   1   9  -4    0.50    0.06
  -1   9   4    0.55    0.06
  -1   9   4    0.48    0.06
   1   9  -4    0.60    0.06
   1   9   4    0.72    0.08
  -1   9  -4    0.67    0.05
   1   9   4    0.44    0.06
  -1  -9   4    0.45    0.07
  -1   9  -4    0.43    0.05
   1   9   4    0.57    0.06
   1   9   4    0.56    0.06
  -1   9  -4    0.55    0.05
   2   9  -4   10.74    0.71
   2   9  -4   11.05    0.72
  -2   9   4   10.39    0.71
  -2   9   4   10.05    0.71
   2   9  -4   11.69    0.71
   2   9   4   10.52    0.71
  -2   9  -4   10.57    0.71
  -2   9  -4    9.80    0.71
   2  -9  -4   10.99    0.71
   2   9   4    9.29    0.71
   3   9  -4    3.01    0.23
  -3   9   4    2.75    0.21
   3   9  -4    3.09    0.21
   3   9  -4    3.44    0.23
  -3   9   4    3.16    0.22
  -3   9   4    2.62    0.33
   3   9   4    2.97    0.21
  -3   9  -4    2.86    0.21
  -3   9  -4    3.10    0.21
  -4   9   4    1.30    0.21
  -4   9   4    1.29    0.11
   4   9  -4    1.38    0.13
   4   9  -4    1.33    0.10
  -4   9  -4    1.38    0.11
   4   9   4    1.18    0.10
   4   9   4    1.19    0.11
  -4   9  -4    1.44    0.11
  -4   9  -4    1.57    0.19
  -5   9   4   10.68    0.77
  -5   9   4   10.02    0.68
   5   9  -4   10.36    0.68
  -5   9   4    9.74    0.68
   5   9  -4    9.88    0.69
  -5  -9  -4    9.90    0.68
   5   9   4    9.82    0.68
   5  -9  -4   10.25    0.70
  -6   9   4    1.83    0.20
  -6   9   4    1.52    0.14
  -6  -9  -4    1.75    0.13
  -6   9   4    1.81    0.13
   6  -9   4    1.64    0.13
   6   9  -4    1.89    0.13
   6  -9  -4    1.74    0.14
  -6  -9   4    1.68    0.13
  -6   9  -4    2.11    0.20
  -6   9  -4    2.11    0.13
  -7  -9  -4    4.36    0.31
  -7   9   4    4.72    0.35
  -7  -9   4    4.36    0.31
  -7   9  -4    5.01    0.41
  -7   9  -4    4.53    0.31
   7  -9  -4    4.23    0.31
   0  10  -4    4.64    0.29
   0  10  -4    4.22    0.29
   0  10  -4    4.02    0.29
   0  10   4    3.92    0.29
   0  10   4    4.33    0.29
  -1  10   4    6.83    0.49
  -1  10   4    6.74    0.49
   1  10  -4    7.32    0.49
   1  10  -4    6.55    0.48
   1  10  -4    7.24    0.49
   1  10  -4    7.89    0.49
   1  10   4    6.40    0.49
   1  10   4    7.42    0.49
  -1  10  -4    7.57    0.48
  -1  10  -4    7.49    0.50
  -2  10   4    3.63    0.26
   2  10  -4    3.70    0.25
  -2  10   4    3.51    0.26
   2  10  -4    3.79    0.27
   2  10  -4    4.07    0.26
   2  10  -4    3.37    0.26
   2 -10  -4    3.84    0.26
  -2  10  -4    3.49    0.25
   2  10   4    3.61    0.26
  -2  10  -4    4.08    0.25
  -2  10  -4    3.63    0.25
   2  10   4    3.27    0.25
  -3  10   4   25.98    1.74
  -3  10   4   24.31    1.73
   3  10  -4   25.61    1.73
  -3  10   4   26.93    1.81
   3  10  -4   25.30    1.74
   3  10  -4   27.60    1.74
  -3  10  -4   23.74    1.73
   3  10   4   22.76    1.73
  -3  10  -4   29.60    1.74
  -3  10  -4   26.51    1.73
  -4  10   4    7.32    0.56
  -4  10   4    6.57    0.48
  -4  10   4    6.88    0.48
   4  10  -4    6.88    0.49
  -4  10   4    7.64    0.49
   4  10  -4    6.85    0.48
   4  10   4    6.00    0.48
   4 -10  -4    7.18    0.50
  -4  10  -4    8.05    0.48
  -4  10  -4    7.49    0.48
  -4  10  -4    6.64    0.48
  -5  10   4    1.16    0.11
  -5  10   4    1.10    0.19
   5  10  -4    1.06    0.09
  -5 -10  -4    1.04    0.08
  -5  10   4    1.07    0.09
   5  10  -4    0.88    0.11
  -5  10  -4    1.04    0.10
   5  10   4    1.00    0.08
  -6 -10  -4    0.85    0.07
   6 -10   4    0.78    0.07
  -6  10   4    0.84    0.07
  -6  10   4    0.96    0.15
   6  10  -4    0.81    0.07
  -6  10  -4    0.98    0.07
   6 -10  -4    0.82    0.08
  -6  10  -4    0.96    0.13
  -6 -10   4    0.80    0.08
   7 -10   4    3.50    0.24
  -7  10   4    3.48    0.24
  -7 -10  -4    3.59    0.23
  -7  10  -4    3.39    0.27
   7 -10  -4    3.33    0.24
   0  11  -4    0.10    0.02
   0  11   4    0.08    0.03
   0  11  -4    0.09    0.03
   0  11   4    0.15    0.03
   0  11  -4    0.14    0.02
   1  11  -4    0.27    0.04
  -1  11   4    0.37    0.05
   1  11  -4    0.33    0.06
   1  11  -4    0.34    0.05
   1  11  -4    0.33    0.04
  -1  11   4    0.34    0.05
  -1  11   4    0.36    0.05
  -1  11  -4    0.39    0.04
   1  11   4    0.52    0.08
  -1  11  -4    0.39    0.13
  -1  11  -4    0.32    0.04
  -1  11  -4    0.35    0.04
  -1  11  -4    0.41    0.05
   1  11   4    0.30    0.05
   2  11  -4   23.88    1.72
   2  11  -4   25.80    1.72
   2  11  -4   26.81    1.73
  -2  11   4   25.34    1.72
  -2  11   4   25.48    1.72
   2  11  -4   27.96    1.72
  -2  11   4   25.44    1.72
  -2  11  -4   24.81    1.71
  -2  11  -4   30.30    1.79
  -2  11  -4   24.86    1.72
   2  11   4   22.35    1.72
   2 -11  -4   24.38    1.72
  -2  11  -4   25.48    1.72
  -3  11   4    4.69    0.30
  -3  11   4    4.34    0.30
   3  11  -4    4.37    0.30
   3  11  -4    4.42    0.31
  -3  11   4    4.27    0.30
   3  11   4    3.74    0.30
  -3  11  -4    4.28    0.29
  -3  11  -4    4.25    0.30
  -3  11  -4    4.51    0.30
  -4  11   4    3.29    0.31
  -4  11   4    2.82    0.21
  -4  11   4    2.89    0.22
   4  11  -4    2.83    0.21
  -4  11   4    3.16    0.22
   4  11  -4    2.86    0.23
  -4  11  -4    2.60    0.21
   4 -11  -4    2.87    0.23
  -4  11  -4    3.47    0.22
  -4  11  -4    3.15    0.21
  -4  11  -4    3.49    0.29
  -4  11  -4    2.79    0.21
   5  11  -4    2.01    0.17
  -5  11   4    1.98    0.16
   5  11  -4    2.08    0.16
  -5  11   4    2.08    0.16
  -5 -11  -4    2.22    0.15
  -5  11   4    2.38    0.23
   5 -11  -4    2.03    0.17
  -5  11  -4    2.51    0.16
  -5  11  -4    2.22    0.16
  -5  11  -4    2.41    0.22
  -6 -11  -4    0.30    0.03
   6 -11   4    0.30    0.04
   6  11  -4    0.32    0.03
  -6  11  -4    0.34    0.04
   6 -11  -4    0.33    0.05
  -6 -11   4    0.42    0.06
  -6  11  -4    0.35    0.09
   0  12  -4    0.86    0.07
   0  12   4    0.98    0.08
   0  12  -4    0.92    0.08
   0  12  -4    0.92    0.08
   0  12  -4    1.02    0.09
   0  12   4    0.96    0.08
   1  12  -4    0.47    0.05
   1  12  -4    0.46    0.05
  -1  12   4    0.43    0.06
  -1  12   4    0.43    0.05
  -1  12   4    0.41    0.05
   1  12  -4    0.39    0.05
   1  12  -4    0.40    0.06
  -1  12  -4    0.37    0.05
  -1  12  -4    0.47    0.06
  -1  12  -4    0.38    0.05
   1  12   4    0.38    0.05
   1  12   4    0.49    0.07
  -1  12  -4    0.37    0.04
  -2  12   4    0.28    0.04
   2  12  -4    0.30    0.04
  -2  12   4    0.36    0.05
   2  12  -4    0.33    0.05
  -2  12   4    0.27    0.04
   2  12  -4    0.28    0.04
   2  12  -4    0.30    0.04
  -2  12  -4    0.28    0.04
  -2  12  -4    0.32    0.12
  -2  12  -4    0.32    0.05
   2 -12  -4    0.26    0.04
  -2  12  -4    0.28    0.04
   2  12   4    0.31    0.05
  -2  12  -4    0.28    0.04
  -3  12   4    4.88    0.34
  -3  12   4    4.55    0.34
   3  12  -4    4.50    0.33
  -3  12   4    4.58    0.34
   3  12  -4    4.62    0.35
  -3  12  -4    5.51    0.34
  -3  12  -4    4.90    0.33
  -3  12  -4    5.40    0.40
  -3  12  -4    4.67    0.33
   4  12  -4    2.64    0.21
   4  12  -4    2.77    0.22
  -4  12   4    3.26    0.21
   4 -12  -4    2.70    0.21
  -4  12  -4    2.76    0.22
  -4  12  -4    2.77    0.20
  -4  12  -4    3.09    0.20
  -5  12   4    3.62    0.23
  -5  12   4    3.17    0.23
  -5 -12  -4    3.25    0.22
   5  12  -4    3.14    0.23
   5  12  -4    2.88    0.24
  -5  12   4    3.41    0.29
  -5  12   4    3.20    0.23
  -5  12  -4    3.50    0.23
  -5  12  -4    3.39    0.23
  -5  12  -4    3.52    0.28
   5 -12  -4    2.87    0.23
   6  12  -4    0.01    0.02
   6 -12   4    0.04    0.02
  -6 -12  -4    0.08    0.02
  -6  12   4    0.05    0.03
   6 -12  -4    0.07    0.03
  -6  12  -4    0.02    0.02
  -6  12  -4    0.02    0.05
   6 -12  -4    0.04    0.02
   0  13   4    1.16    0.09
   0  13  -4    0.88    0.08
   0  13  -4    0.99    0.08
   0  13  -4    1.03    0.08
   0  13  -4    1.07    0.09
   0  13   4    0.99    0.09
   1  13  -4    9.76    0.67
   1  13  -4   10.50    0.68
  -1  13   4   10.22    0.67
  -1  13   4   10.01    0.67
   1  13  -4    9.04    0.66
   1  13  -4   10.19    0.67
  -1  13   4    9.58    0.67
  -1  13  -4    9.87    0.67
  -1  13  -4    9.89    0.67
   1  13   4   11.04    0.67
  -1  13  -4   10.78    0.67
   1  13   4    8.95    0.67
  -1  13  -4    8.28    0.66
  -2  13   4    8.71    0.59
   2  13  -4    9.11    0.59
   2  13  -4    7.80    0.59
   2  13  -4    8.88    0.60
  -2  13   4    9.12    0.59
  -2  13   4    8.92    0.59
  -2  13  -4    8.67    0.65
   2  13   4    7.84    0.59
  -2  13  -4    8.57    0.59
  -2  13  -4    8.45    0.59
  -2  13  -4    9.69    0.59
  -3  13   4    1.36    0.11
  -3  13   4    1.12    0.09
  -3  13   4    1.10    0.10
   3  13  -4    1.05    0.10
  -3  13  -4    1.22    0.10
  -3  13  -4    1.11    0.09
  -3  13  -4    1.03    0.10
  -4  13   4    0.62    0.07
  -4  13   4    0.53    0.06
  -4  13   4    0.58    0.06
   4  13  -4    0.55    0.05
   4  13  -4    0.57    0.08
  -4  13   4    0.58    0.06
   4 -13  -4    0.45    0.07
  -4  13  -4    0.59    0.06
  -4  13  -4    0.59    0.05
  -4  13  -4    0.59    0.06
  -4  13  -4    0.58    0.11
  -5  13   4    1.16    0.10
  -5  13   4    1.24    0.09
   5 -13   4    1.07    0.09
   5  13  -4    1.28    0.09
  -5  13  -4    1.29    0.14
  -5  13  -4    1.32    0.09
   5 -13  -4    1.10    0.10
  -6  13  -4    0.24    0.04
   0  14   4    1.07    0.09
   0  14  -4    1.11    0.09
   0  14  -4    1.19    0.10
   0  14  -4    1.28    0.09
   0  14  -4    0.94    0.09
   0  14   4    1.28    0.10
   1  14  -4    4.01    0.29
  -1  14   4    4.23    0.29
   1  14  -4    3.67    0.29
   1  14  -4    4.28    0.30
   1  14  -4    4.38    0.29
  -1  14   4    4.48    0.29
  -1  14  -4    4.20    0.29
   1  14   4    4.05    0.29
  -1  14  -4    4.20    0.29
  -1  14  -4    4.31    0.29
   2  14  -4    4.80    0.34
  -2  14   4    5.31    0.33
   2  14  -4    4.28    0.32
   2  14  -4    5.30    0.33
  -2  14  -4    4.30    0.33
   2  14   4    4.45    0.33
   3  14  -4    1.97    0.16
  -3  14   4    2.34    0.16
   3  14  -4    2.11    0.17
  -3  14   4    2.48    0.16
  -3  14   4    2.32    0.16
   3 -14  -4    2.19    0.17
  -3  14  -4    2.40    0.16
  -3  14  -4    2.22    0.16
  -3  14  -4    2.35    0.16
  -4  14   4    0.62    0.06
   4 -14   4    0.51    0.05
   4  14  -4    0.58    0.05
  -4  14  -4    0.65    0.05
  -4  14  -4    0.68    0.06
   4 -14  -4    0.50    0.07
  -4  14  -4    0.58    0.05
  -5  14   4    0.23    0.03
   5 -14   4    0.15    0.02
   5  14  -4    0.17    0.02
   0  15   4    3.97    0.25
   0  15  -4    3.59    0.25
   0  15   4    3.55    0.25
   0  15  -4    3.46    0.25
   0  15  -4    3.33    0.25
   1  15  -4    2.91    0.20
  -1  15   4    2.90    0.20
  -1  15   4    3.07    0.20
   1  15  -4    2.76    0.20
   1  15  -4    2.86    0.21
  -1  15  -4    2.93    0.21
  -1  15  -4    2.86    0.20
   1  15   4    2.82    0.20
  -1  15  -4    2.90    0.20
   2  15  -4   12.67    0.91
   2  15  -4   14.25    0.90
  -2  15   4   14.33    0.91
   2  15  -4   11.53    0.90
  -2  15   4   14.20    0.91
  -2  15  -4   13.30    0.90
  -2  15  -4   13.95    0.91
  -2  15  -4   13.62    0.90
   2  15   4   13.05    0.90
   3 -15   4    6.82    0.54
  -3  15   4    8.87    0.54
   3  15  -4    7.34    0.54
   3  15  -4    7.11    0.55
  -3  15   4    8.94    0.54
  -3  15  -4    8.53    0.54
   3 -15  -4    7.73    0.55
  -3  15  -4    8.56    0.54
  -3  15  -4    8.27    0.54
  -4  15   4    0.95    0.07
   4 -15   4    0.85    0.07
   4  15  -4    0.77    0.07
  -4  15  -4    0.95    0.07
  -4  15  -4    0.99    0.07
  -4  15  -4    0.92    0.07
   0  16  -4    2.63    0.18
   0  16  -4    2.57    0.18
   0  16   4    2.66    0.19
   0  16  -4    2.39    0.19
   0  16   4    3.02    0.19
   1  16  -4    0.06    0.03
   1  16  -4    0.06    0.02
  -1  16   4    0.04    0.02
   1  16  -4    0.06    0.02
  -1  16   4    0.07    0.02
  -1  16  -4    0.04    0.02
  -1  16  -4    0.09    0.03
   1  16   4    0.07    0.02
  -1  16  -4    0.07    0.02
  -2  16   4    0.99    0.07
  -2  16   4    0.89    0.07
   2  16  -4    0.73    0.10
  -2  16  -4    0.85    0.07
  -2  16  -4    0.91    0.07
   2  16   4    0.91    0.08
  -2  16  -4    0.90    0.07
  -3  16   4    0.40    0.04
  -3  16   4    0.37    0.05
  -3  16  -4    0.38    0.04
  -3  16  -4    0.37    0.04
  -3  16  -4    0.37    0.04
  -4  16   4    3.36    0.22
  -4  16  -4    3.00    0.22
   0  17   4    8.93    0.60
   0  17  -4    8.81    0.60
   0  17  -4    9.00    0.60
   1  17  -4    0.83    0.07
  -1  17   4    0.78    0.08
   1  17  -4    0.65    0.07
  -1  17   4    0.85    0.06
   1  17   4    0.79    0.06
  -1  17  -4    0.80    0.06
  -1  17  -4    0.83    0.06
  -2  17   4    1.04    0.08
  -2  17   4    1.02    0.09
  -2  17  -4    1.08    0.08
  -2  17  -4    1.09    0.08
  -2  17  -4    0.95    0.08
  -3  17   4    0.04    0.02
  -3  17  -4   -0.02    0.02
  -3  17  -4   -0.01    0.02
   0  18  -4    1.07    0.09
   0  18   4    0.90    0.07
   0  18  -4    0.92    0.07
  -1  18   4    0.25    0.03
  -1  18  -4    0.24    0.03
  -1  18  -4    0.25    0.03
   0   0  -5    0.44    0.33
   0   0   5    0.40    0.39
   1   0   5   39.01    2.36
  -1   0  -5   30.46    2.36
   1   0   5   32.67    2.69
   1   0  -5   38.28    2.74
  -2   0  -5    3.68    0.31
  -2   0   5    4.23    0.29
   2   0  -5    4.62    1.18
   2   0   5    4.31    0.31
  -2   0   5    5.62    0.91
   2   0  -5    4.64    0.32
   2   0  -5    4.43    0.30
  -2   0  -5    4.50    0.88
  -3   0  -5    8.40    0.67
  -3   0  -5    8.55    2.14
   3   0   5    8.86    0.64
   3   0   5    9.83    0.66
  -3   0   5   10.57    0.64
   3   0  -5   10.10    0.69
   4   0   5    2.69    0.19
  -4   0   5    2.80    0.20
  -4   0   5    2.88    0.19
   4   0   5    2.76    0.20
  -4   0  -5    2.64    0.29
   4   0  -5    2.65    0.21
   4   0  -5    2.42    0.20
   4   0  -5    2.72    0.20
   4   0  -5    2.76    0.21
   4   0   5    3.03    0.19
   4   0  -5    2.67    0.20
  -4   0  -5    2.99    0.19
   5   0  -5    1.49    0.13
   5   0  -5    1.67    0.14
  -5   0   5    1.60    0.12
   5   0   5    1.72    0.13
  -5   0  -5    1.67    0.12
   5   0   5    1.73    0.13
   5   0   5    1.71    0.13
   5   0  -5    1.76    0.13
  -6   0   5    1.15    0.22
   6   0  -5    1.37    0.12
   6   0   5    1.45    0.11
   6   0  -5    1.23    0.11
   6   0   5    1.53    0.12
   6   0  -5    1.53    0.11
   6   0   5    1.64    0.11
  -6   0   5    1.38    0.11
  -6   0  -5    1.26    0.21
  -6   0  -5    1.43    0.10
   7   0  -5    0.51    0.06
  -7   0   5    0.47    0.16
   7   0  -5    0.46    0.06
   7   0   5    0.59    0.06
  -7   0  -5    0.51    0.04
  -7   0   5    0.54    0.05
   8   0  -5    0.03    0.03
   8   0   5    0.07    0.02
   8   0   5    0.05    0.03
   8   0  -5    0.01    0.03
   0  -1   5  113.84    8.99
   0   1  -5  145.08    8.98
   0  -1  -5  130.23    8.98
   0   1   5  132.17    8.99
  -1  -1  -5    2.29    0.18
   1  -1   5    2.26    0.57
  -1   1   5    2.10    0.16
   1   1  -5    2.79    0.60
   1  -1   5    2.74    0.17
   1   1   5    2.62    0.61
  -1  -1   5    2.14    0.16
   1  -1  -5    3.79    0.82
  -1   1  -5    3.44    0.63
  -1   1  -5    2.03    0.18
   2   1  -5   10.23    0.69
   2  -1   5    9.35    0.68
   2   1  -5    8.74    1.36
   2   1  -5   11.03    0.68
  -2   1   5    9.00    0.67
  -2  -1  -5    8.85    0.69
  -2  -1   5   10.65    0.67
  -2   1  -5    7.94    1.38
  -2   1  -5    9.86    1.15
   2  -1  -5   10.86    0.74
   2  -1  -5    9.47    0.68
   2   1   5   10.97    0.68
   2  -1  -5    9.74    1.49
  -3   1   5   12.64    0.85
   3  -1   5   12.17    0.87
   3   1  -5   12.69    0.89
  -3  -1  -5   11.43    0.88
  -3   1   5   16.08    1.85
   3  -1   5   12.41    0.85
   3  -1  -5   13.17    0.90
   3   1   5   13.13    0.87
   3  -1  -5   10.84    2.42
  -3   1  -5   11.11    0.88
  -3  -1   5   14.00    0.85
   4   1  -5   20.47    1.45
   4   1  -5   21.26    1.46
  -4  -1  -5   21.97    1.45
   4   1  -5   21.82    1.46
   4   1  -5   23.41    1.45
   4  -1   5   20.98    1.45
   4  -1   5   20.82    1.45
  -4   1   5   22.11    1.45
   4   1  -5   19.74    1.45
  -4   1   5   21.52    1.45
   4  -1   5   22.86    1.45
   4   1   5   22.89    1.45
  -4   1  -5   19.30    1.51
   4  -1  -5   20.04    1.45
  -4   1  -5   20.72    1.50
   4  -1  -5   18.95    1.45
  -4  -1   5   22.23    1.45
  -4  -1   5   21.46    1.45
   4   1   5   24.05    1.45
   4   1   5   21.87    1.45
   4  -1  -5   22.96    1.46
  -4   1  -5   23.71    1.45
   5  -1   5   15.97    1.01
  -5   1   5   12.85    1.10
  -5  -1  -5   14.91    1.01
  -5   1   5   15.02    1.01
   5   1  -5   16.19    1.01
   5  -1   5   14.57    1.01
   5   1  -5   13.86    1.01
   5   1  -5   14.44    1.02
   5   1  -5   14.49    1.02
  -5   1   5   14.66    1.01
   5  -1  -5   14.98    1.02
  -5  -1   5   14.98    1.01
  -5   1  -5   13.92    1.07
   5   1   5   15.24    1.01
   5  -1  -5   16.23    1.01
   5  -1  -5   13.33    1.01
   5   1   5   16.49    1.02
  -5   1  -5   15.79    1.01
   5   1   5   17.02    1.01
  -6   1   5    2.50    0.31
   6   1  -5    2.90    0.22
   6  -1   5    3.08    0.21
   6  -1   5    3.06    0.21
   6  -1   5    3.37    0.21
   6   1  -5    2.73    0.21
  -6  -1  -5    3.00    0.20
  -6   1   5    2.88    0.20
   6   1  -5    3.01    0.21
   6  -1  -5    2.85    0.22
  -6   1  -5    2.82    0.28
   6   1   5    3.05    0.21
  -6  -1   5    2.97    0.20
  -6   1  -5    3.01    0.20
   6  -1  -5    2.78    0.21
  -6  -1   5    2.47    0.31
   7   1  -5    8.83    0.57
   7   1  -5    8.39    0.57
  -7   1   5    8.64    0.56
  -7   1   5    7.65    0.65
  -7  -1  -5    8.31    0.56
   7  -1   5    8.80    0.57
  -7  -1   5    8.32    0.56
   7  -1  -5    8.27    0.57
   7   1   5    8.72    0.56
  -7  -1   5    7.42    0.65
   7  -1  -5    8.21    0.57
  -8   1   5    1.23    0.17
   8   1  -5    1.63    0.11
   8  -1  -5    1.56    0.11
   8  -1  -5    1.33    0.11
   0  -2   5   76.55    5.52
   0  -2   5   80.85    5.28
  -1   2   5    1.59    0.52
   1   2  -5    0.94    0.43
  -1  -2  -5    1.04    0.10
   1  -2   5    0.87    0.46
   1  -2  -5    1.16    0.10
   1   2   5    1.18    0.59
  -1   2  -5    1.46    0.41
   1  -2  -5    1.29    0.56
  -1  -2   5    1.54    0.43
   1   2   5    1.29    0.10
  -2   2   5   19.73    1.41
   2  -2   5   21.48    1.41
  -2  -2  -5   19.72    1.43
   2   2  -5   20.25    1.97
   2  -2   5   19.88    1.42
  -2   2  -5   22.39    1.82
   2  -2  -5   20.12    1.42
   2   2   5   20.41    1.41
  -2  -2   5   23.51    1.41
   2  -2  -5   22.79    2.32
   2  -2  -5   23.43    1.45
  -2   2  -5   18.48    2.03
   3  -2   5    0.24    0.06
   3  -2   5    0.22    0.03
  -3  -2  -5    0.24    0.08
  -3   2   5    0.31    0.04
   3   2  -5    0.22    0.09
   3  -2   5    0.26    0.04
   3   2  -5    0.17    0.04
  -3   2   5    0.19    0.03
   3   2  -5    0.16    0.03
   3   2  -5    0.21    0.05
   3   2   5    0.29    0.09
  -3   2  -5   -0.11    0.95
   3  -2  -5    0.08    2.06
   3  -2  -5    0.27    0.10
   3   2   5    0.24    0.04
  -3   2  -5    0.24    0.09
  -3  -2   5    0.27    0.04
   3   2   5    0.30    0.04
   4   2  -5   11.61    0.73
  -4   2   5   10.68    0.73
  -4  -2  -5   10.87    0.73
   4   2  -5    9.68    0.73
   4   2  -5   10.97    0.74
   4  -2   5   10.83    0.73
   4  -2   5    9.81    0.74
   4  -2   5    9.76    0.73
  -4   2   5   10.88    0.73
   4   2  -5   10.36    0.74
   4   2  -5    9.58    0.73
   4  -2  -5   11.44    0.75
   4   2   5   12.47    0.73
  -4  -2   5   11.03    0.73
   4   2   5   11.17    0.73
  -4   2  -5   10.39    0.79
   4   2   5   12.40    0.74
  -4   2  -5   12.24    0.73
   4  -2  -5   10.07    0.74
   5  -2   5    5.10    0.36
   5   2  -5    5.15    0.37
   5   2  -5    5.38    0.36
  -5   2   5    5.26    0.35
   5  -2   5    5.55    0.36
  -5   2   5    4.49    0.45
   5   2  -5    5.25    0.37
  -5   2   5    5.32    0.36
   5  -2   5    5.01    0.36
   5   2  -5    4.81    0.36
  -5  -2  -5    5.15    0.35
   5   2   5    5.40    0.36
   5  -2  -5    5.35    0.37
  -5   2  -5    5.02    0.42
  -5   2  -5    5.67    0.35
  -5  -2   5    5.25    0.36
   6   2  -5   20.08    1.35
  -6   2   5   19.99    1.34
  -6  -2  -5   19.81    1.33
  -6   2   5   17.47    1.44
   6   2  -5   19.19    1.34
   6   2  -5   20.91    1.34
   6  -2   5   23.04    1.34
   6  -2   5   20.44    1.34
   6  -2   5   20.70    1.34
  -6   2  -5   20.51    1.33
  -6   2  -5   19.68    1.40
   6  -2  -5   18.38    1.34
  -6  -2   5   19.88    1.34
   6   2   5   20.95    1.34
  -6  -2   5   17.27    1.44
   6  -2  -5   20.30    1.35
   7   2  -5    0.37    0.05
   7  -2   5    0.45    0.05
  -7   2   5    0.45    0.04
   7   2  -5    0.42    0.06
   7  -2   5    0.53    0.06
  -7  -2  -5    0.40    0.04
  -7   2   5    0.36    0.14
  -7  -2   5    0.41    0.04
   7  -2  -5    0.37    0.06
   7   2   5    0.42    0.05
  -7   2  -5    0.41    0.15
   7  -2  -5    0.40    0.06
  -7  -2   5    0.36    0.14
  -8   2   5    2.14    0.22
   8  -2   5    2.21    0.16
   8  -2  -5    2.16    0.17
   8  -2  -5    2.49    0.16
   0  -3   5    6.93    0.47
   0  -3  -5    6.53    0.97
  -1  -3  -5   93.51    6.15
   1  -3   5   91.65    6.14
   1  -3  -5   92.15    6.54
   1   3   5   89.55    6.50
   2   3  -5    5.83    1.16
   2  -3   5    5.82    0.41
  -2  -3  -5    5.84    0.42
   2  -3   5    6.01    0.40
   2  -3  -5    6.52    0.44
   2  -3  -5    8.40    1.57
  -2   3  -5    6.27    1.04
   2  -3  -5    5.27    0.40
   2   3   5    5.58    0.39
   3   3  -5    6.31    0.41
  -3   3   5    6.11    0.41
   3   3  -5    6.06    0.42
   3   3  -5    5.41    0.41
  -3   3   5    5.52    0.41
   3  -3   5    6.18    0.44
  -3  -3  -5    5.54    0.44
  -3   3   5    5.71    0.41
   3  -3   5    6.48    0.41
   3  -3  -5    6.56    0.47
  -3   3  -5    6.17    0.47
   3   3   5    6.38    0.41
   3  -3  -5    5.56    0.41
   4   3  -5    4.22    0.32
  -4   3   5    4.49    0.30
   4  -3   5    3.88    0.30
   4   3  -5    4.07    0.31
   4   3  -5    4.92    0.31
   4  -3   5    4.61    0.31
   4   3  -5    4.51    0.32
   4  -3   5    3.97    0.31
   4   3  -5    3.97    0.30
  -4   3   5    3.84    0.39
  -4   3   5    4.20    0.31
  -4  -3  -5    4.35    0.30
  -4   3  -5    4.50    0.37
   4  -3  -5    4.82    0.32
  -4  -3   5    4.66    0.31
   4   3   5    4.59    0.30
  -4   3  -5    5.20    0.31
  -4   3  -5    5.13    0.30
   4  -3  -5    4.04    0.31
   4   3   5    4.65    0.30
   5  -3   5    0.39    0.05
   5   3  -5    0.42    0.05
  -5   3   5    0.37    0.15
   5  -3   5    0.53    0.06
  -5   3   5    0.43    0.04
   5   3  -5    0.44    0.07
   5  -3   5    0.36    0.06
   5   3  -5    0.36    0.05
   5   3  -5    0.45    0.07
  -5   3   5    0.43    0.07
  -5  -3  -5    0.35    0.04
   5   3   5    0.46    0.05
   5  -3  -5    0.48    0.08
   5   3   5    0.36    0.05
   5   3   5    0.52    0.06
  -5   3  -5    0.47    0.04
  -5   3  -5    0.36    0.13
  -5  -3   5    0.45    0.05
  -6   3   5    1.50    0.14
  -6  -3  -5    1.55    0.11
   6   3  -5    1.71    0.12
   6   3  -5    1.70    0.13
   6  -3   5    1.61    0.13
   6  -3   5    1.78    0.12
   6  -3   5    1.62    0.12
   6   3  -5    1.51    0.12
  -6   3   5    1.40    0.23
  -6   3   5    1.59    0.11
   6  -3  -5    1.39    0.13
  -6   3  -5    1.59    0.19
   6  -3  -5    1.60    0.14
  -6  -3   5    1.36    0.23
  -6  -3   5    1.62    0.12
   6   3   5    1.74    0.12
   7  -3   5    7.74    0.51
  -7  -3  -5    7.64    0.50
   7   3  -5    7.98    0.51
  -7   3   5    6.84    0.59
   7   3  -5    8.78    0.51
   7   3  -5    7.66    0.51
  -7   3  -5    7.63    0.56
   7  -3  -5    7.10    0.51
  -7  -3   5    7.32    0.51
   7   3   5    7.50    0.51
  -7  -3   5    6.39    0.58
   7  -3  -5    7.16    0.52
   8  -3   5    0.00    0.03
   8  -3   5    0.01    0.03
  -8   3   5    0.04    0.07
   8   3   5   -0.01    0.02
   8  -3  -5   -0.02    0.02
  -8  -3   5    0.04    0.02
   8  -3  -5    0.01    0.02
   0  -4   5   47.29    3.24
   0   4   5   42.34    2.96
   0   4  -5   43.55    2.97
  -1  -4  -5   58.45    3.44
   1   4   5   43.60    3.41
   1  -4  -5   54.53    3.92
   1   4   5   55.62    4.08
  -1   4  -5   43.47    3.73
   2  -4   5   12.86    0.86
   2   4  -5   12.56    0.87
  -2  -4  -5   12.32    0.87
   2  -4   5   12.91    0.85
   2  -4  -5   13.35    0.89
   2  -4  -5   11.03    0.85
   2  -4  -5   13.21    0.86
  -2   4  -5   12.57    1.48
   3   4  -5    6.60    0.51
  -3   4   5    7.02    0.51
  -3  -4  -5    6.91    0.55
   3  -4   5    8.27    0.57
   3  -4   5    7.79    0.51
  -3   4   5    6.45    0.59
  -3   4   5    7.40    0.51
   3   4  -5    7.78    0.52
   3   4  -5    8.41    0.51
   3   4   5    7.07    0.51
   3  -4  -5    7.37    0.51
  -3   4  -5    8.20    0.51
   3  -4  -5    8.40    0.59
   3   4   5    8.22    0.51
  -3   4  -5    7.71    0.56
   4   4  -5    2.90    0.21
   4   4  -5    2.48    0.20
   4  -4   5    2.97    0.21
   4  -4   5    2.47    0.21
  -4  -4  -5    2.76    0.19
   4  -4   5    2.38    0.20
  -4   4   5    2.96    0.19
  -4   4   5    2.82    0.20
   4   4  -5    3.18    0.20
  -4   4   5    2.42    0.28
   4   4  -5    2.74    0.21
   4  -4  -5    2.49    0.21
  -4  -4   5    2.96    0.20
  -4   4  -5    2.96    0.26
   4   4   5    2.83    0.19
  -4   4  -5    3.09    0.21
   4  -4  -5    3.12    0.22
   4   4   5    3.06    0.20
   5  -4   5    5.39    0.40
   5  -4   5    5.46    0.40
   5   4  -5    5.46    0.40
  -5   4   5    5.12    0.49
  -5   4   5    5.86    0.39
   5   4  -5    6.05    0.40
  -5   4   5    5.83    0.40
   5   4  -5    6.31    0.40
   5   4  -5    5.64    0.41
   5  -4   5    6.25    0.40
  -5  -4  -5    5.60    0.39
  -5   4  -5    6.08    0.47
  -5  -4   5    5.83    0.40
   5   4   5    6.23    0.40
   5  -4  -5    6.12    0.41
   5  -4  -5    5.24    0.40
   6   4  -5    7.23    0.50
  -6  -4  -5    7.12    0.49
   6   4  -5    7.56    0.50
   6  -4   5    7.34    0.50
   6  -4   5    7.21    0.50
  -6   4   5    6.44    0.59
  -6   4   5    7.54    0.50
   6   4  -5    8.37    0.50
   6  -4  -5    7.30    0.51
   6  -4  -5    6.89    0.50
  -6   4  -5    7.84    0.56
  -6  -4   5    7.36    0.50
  -6  -4   5    6.27    0.59
   6   4   5    7.59    0.50
   7  -4   5    2.98    0.20
   7   4  -5    3.00    0.20
   7   4  -5    2.90    0.20
  -7   4   5    2.58    0.27
  -7  -4  -5    2.89    0.19
  -7   4  -5    2.93    0.20
  -7  -4   5    2.73    0.20
  -7   4  -5    3.14    0.26
  -7  -4   5    2.49    0.28
   7  -4  -5    2.74    0.21
   7  -4  -5    2.74    0.20
   7   4   5    2.77    0.20
  -8   4   5    0.72    0.13
   8  -4  -5    0.73    0.06
  -8  -4   5    0.71    0.06
   8  -4  -5    0.78    0.07
   0  -5  -5   69.70    4.38
   0   5  -5   60.79    4.39
   0   5   5   66.56    4.39
   0  -5   5   65.35    4.63
   1  -5   5   60.49    3.75
   1   5  -5   57.53    3.76
  -1   5   5   56.14    3.75
   1  -5  -5   53.76    3.75
   1   5   5   52.65    3.75
  -2  -5  -5   40.94    2.84
   2  -5   5   44.77    2.83
  -2   5   5   40.68    2.81
   2   5  -5   36.81    2.82
   2  -5   5   41.42    2.81
   2  -5  -5   46.32    2.86
   2  -5  -5   37.74    2.81
   2  -5  -5   47.43    2.83
  -3   5   5    2.16    0.17
   3   5  -5    2.41    0.18
   3   5  -5    2.52    0.17
  -3   5   5    1.95    0.26
   3   5  -5    2.39    0.18
  -3  -5  -5    2.40    0.17
   3   5   5    1.97    0.16
   3   5   5    2.61    0.17
  -3   5  -5    2.41    0.22
  -3   5  -5    2.37    0.17
   4   5  -5    4.68    0.36
  -4   5   5    5.33    0.35
  -4  -5  -5    5.01    0.35
   4   5  -5    5.40    0.38
   4   5  -5    5.57    0.37
   4  -5   5    4.51    0.36
  -4   5  -5    5.85    0.36
   4  -5  -5    4.75    0.37
   4   5   5    5.14    0.35
  -4  -5   5    5.27    0.36
   4   5   5    5.86    0.36
   5   5  -5    1.52    0.12
   5  -5   5    1.16    0.11
   5  -5   5    1.21    0.10
  -5   5   5    1.30    0.11
   5   5  -5    1.41    0.10
   5   5  -5    1.26    0.12
   5  -5   5    1.44    0.12
  -5   5   5    1.14    0.20
  -5  -5  -5    1.26    0.10
   5   5  -5    1.22    0.10
   5  -5  -5    1.19    0.12
   5   5   5    1.32    0.10
   5  -5  -5    1.38    0.13
  -5  -5   5    1.37    0.10
  -5   5  -5    1.44    0.18
   5   5   5    1.42    0.10
   6  -5   5    0.09    0.03
  -6   5   5    0.08    0.04
  -6  -5  -5    0.06    0.02
   6   5  -5    0.17    0.03
  -6   5   5    0.11    0.10
   6   5  -5    0.10    0.03
   6   5   5    0.13    0.04
  -6  -5   5    0.09    0.12
   6  -5  -5    0.15    0.04
  -6   5  -5    0.09    0.08
   6  -5  -5    0.12    0.04
  -6  -5   5    0.11    0.03
  -7  -5  -5    9.45    0.63
   7  -5   5    9.78    0.63
  -7   5   5    8.82    0.70
   7   5  -5    9.54    0.63
   7  -5  -5    9.20    0.63
   7  -5  -5    8.53    0.64
  -7   5  -5   10.15    0.63
  -7  -5   5    9.25    0.63
  -7   5  -5   10.20    0.68
  -7  -5   5    8.21    0.70
  -8   5   5    0.26    0.11
   8  -5  -5    0.16    0.04
  -8  -5   5    0.21    0.03
   0   6  -5    2.76    0.21
   0  -6  -5    3.23    0.20
   0   6  -5    2.48    0.62
  -1   6   5   19.30    1.33
   1  -6   5   20.75    1.33
   1  -6  -5   19.87    1.33
   1   6   5   19.56    1.33
  -2   6   5    0.84    0.08
   2   6  -5    0.94    0.09
  -2  -6  -5    0.99    0.12
   2   6  -5    1.03    0.08
   2  -6   5    0.95    0.09
   2   6  -5    0.96    0.09
   2  -6  -5    0.93    0.08
  -2   6  -5    1.08    0.09
   2  -6  -5    1.05    0.15
  -2   6  -5    1.18    0.14
   2   6   5    1.11    0.09
   2  -6  -5    0.91    0.08
   2  -6  -5    1.20    0.11
  -2   6  -5    0.92    0.08
  -3   6   5    1.36    0.11
   3   6  -5    1.55    0.12
   3   6  -5    1.21    0.11
   3   6  -5    1.55    0.11
  -3  -6  -5    1.36    0.13
   3   6  -5    1.54    0.12
   3   6  -5    1.26    0.11
  -3   6   5    1.18    0.21
   3   6   5    1.65    0.11
  -3   6  -5    1.61    0.11
   3   6   5    1.23    0.11
  -3   6  -5    1.56    0.17
  -3   6  -5    1.36    0.11
  -4   6   5    1.08    0.19
   4   6  -5    1.00    0.11
   4   6  -5    0.98    0.08
   4   6  -5    1.28    0.09
  -4   6   5    0.99    0.09
   4   6   5    1.14    0.09
  -4   6  -5    1.15    0.15
   4   6   5    1.05    0.08
   4  -6  -5    0.94    0.12
  -5  -6  -5    2.85    0.20
  -5   6   5    2.90    0.21
   5   6  -5    3.17    0.21
   5  -6   5    2.80    0.22
   5   6  -5    2.89    0.22
   5  -6   5    2.68    0.21
   5   6  -5    2.87    0.20
  -5   6   5    2.69    0.31
   5  -6  -5    3.08    0.23
   5   6   5    3.11    0.21
  -5  -6   5    3.12    0.21
   5  -6  -5    2.54    0.22
   5   6   5    3.07    0.20
  -5   6  -5    3.24    0.28
   6   6  -5    0.06    0.04
   6  -6   5    0.04    0.04
   6   6  -5    0.05    0.03
   6  -6   5    0.07    0.04
  -6   6   5    0.05    0.05
  -6   6   5    0.00    0.04
   6  -6   5    0.11    0.05
   6  -6  -5    0.12    0.05
   6   6   5    0.08    0.03
   6  -6  -5   -0.01    0.04
   6   6   5    0.13    0.05
  -6  -6   5    0.02    0.12
  -7  -6  -5    0.31    0.03
   7  -6   5    0.34    0.04
  -7   6   5    0.25    0.11
   7   6  -5    0.32    0.04
   7  -6  -5    0.28    0.05
   7  -6  -5    0.38    0.06
  -7  -6   5    0.31    0.04
  -7   6  -5    0.35    0.05
  -7   6  -5    0.36    0.11
   0  -7  -5    9.04    0.62
   0   7  -5    8.43    0.63
   0   7   5    8.25    0.63
   0   7  -5    9.85    0.69
   0   7   5    8.84    0.63
   0   7  -5   10.03    0.63
   0   7  -5   10.92    0.63
   0   7  -5    9.15    0.63
   0  -7   5    9.16    0.63
  -1  -7  -5   36.65    2.23
   1   7  -5   34.89    2.20
  -1   7   5   29.24    2.20
   1   7  -5   31.52    2.20
   1   7  -5   33.36    2.21
   1   7   5   30.58    2.20
   1  -7  -5   28.98    2.20
   1   7   5   32.83    2.20
  -1   7  -5   35.90    2.26
   1  -7  -5   35.05    2.24
  -1   7  -5   28.73    2.20
  -1   7  -5   37.24    2.21
   2   7  -5    3.83    0.28
   2   7  -5    4.15    0.27
   2   7  -5    4.00    0.28
  -2   7   5    3.41    0.27
  -2   7   5    3.64    0.28
  -2   7  -5    3.81    0.27
  -2   7  -5    3.41    0.27
  -2   7  -5    4.42    0.33
   2  -7  -5    4.04    0.27
   2   7   5    4.16    0.27
  -2   7  -5    4.47    0.27
  -3   7   5   17.62    1.43
   3   7  -5   19.60    1.37
   3   7  -5   22.32    1.37
  -3   7   5   20.55    1.36
  -3   7   5   18.90    1.36
   3   7  -5   21.22    1.36
   3   7   5   17.47    1.36
   3   7   5   22.03    1.36
  -3   7  -5   23.08    1.42
  -3   7  -5   19.53    1.36
  -3   7  -5   20.78    1.36
  -4   7   5    9.65    0.68
  -4  -7  -5    9.41    0.68
  -4   7   5    9.41    0.76
   4   7  -5    8.83    0.67
   4   7  -5   10.79    0.68
   4   7  -5    9.72    0.69
  -4   7  -5   11.56    0.75
   4   7   5   10.57    0.68
  -4   7  -5   11.21    0.68
   4   7   5    9.25    0.68
   5  -7   5    1.77    0.15
   5   7  -5    2.17    0.15
  -5   7   5    2.01    0.15
  -5   7   5    1.91    0.24
   5   7  -5    1.83    0.16
  -5  -7  -5    1.96    0.14
   5  -7  -5    1.86    0.17
  -5   7  -5    2.29    0.22
   5   7   5    1.96    0.15
   5   7   5    2.06    0.14
  -5  -7   5    1.91    0.15
   5  -7  -5    2.04    0.17
  -6   7   5    2.26    0.15
   6   7  -5    2.01    0.15
  -6   7   5    2.05    0.24
   6  -7   5    2.06    0.15
  -6   7   5    2.12    0.16
  -6  -7  -5    2.10    0.14
  -6  -7   5    1.91    0.27
   6  -7  -5    1.91    0.16
   6  -7  -5    2.00    0.17
  -6  -7   5    2.09    0.15
   6   7   5    1.97    0.15
   7  -7   5    2.48    0.17
  -7   7   5    2.42    0.23
   7   7  -5    2.32    0.17
  -7  -7  -5    2.43    0.16
   7  -7  -5    2.11    0.18
  -7   7  -5    2.49    0.17
   7  -7  -5    2.34    0.18
  -7   7  -5    2.62    0.22
  -7  -7   5    2.42    0.17
   0   8   5    6.09    0.44
   0   8  -5    6.08    0.43
   0   8  -5    6.13    0.44
   0   8  -5    7.17    0.44
   0  -8  -5    6.57    0.43
   1   8  -5   10.87    0.67
  -1   8   5    8.69    0.67
   1   8  -5    9.09    0.67
  -1   8   5    9.40    0.67
   1   8  -5   11.34    0.67
   1   8  -5    9.97    0.67
  -1   8  -5   11.59    0.73
   1   8   5    9.38    0.67
  -1  -8   5    9.71    0.67
  -1   8  -5    9.38    0.67
  -1   8  -5    9.09    0.67
   1   8   5   10.20    0.67
   2   8  -5    5.92    0.39
  -2   8   5    5.39    0.39
  -2   8   5    5.12    0.39
   2   8  -5    5.94    0.39
   2   8  -5    5.79    0.40
  -2   8  -5    5.62    0.39
   2   8   5    5.93    0.39
  -2   8  -5    5.41    0.39
   2  -8  -5    5.73    0.39
  -2   8  -5    6.67    0.39
  -3   8   5    3.74    0.37
   3   8  -5    4.33    0.28
  -3   8   5    3.88    0.28
   3   8  -5    4.53    0.28
   3   8  -5    3.93    0.29
  -3   8   5    4.27    0.28
  -3   8  -5    4.38    0.28
  -3   8  -5    3.61    0.28
   3   8   5    4.44    0.28
   3   8   5    3.48    0.27
   3   8   5    3.39    0.28
  -4   8   5    5.44    0.38
   4   8  -5    5.31    0.40
  -4  -8  -5    5.27    0.38
   4   8  -5    5.86    0.38
  -4   8   5    5.44    0.47
   4   8   5    5.33    0.38
   4   8   5    5.82    0.38
  -4   8  -5    6.13    0.38
  -4   8  -5    5.62    0.38
  -5   8   5    7.75    0.51
   5  -8   5    6.54    0.51
   5   8  -5    7.09    0.52
   5   8  -5    7.75    0.51
  -5  -8  -5    7.53    0.50
  -5   8   5    7.64    0.60
   5  -8  -5    7.62    0.53
  -5   8  -5    8.26    0.51
  -5  -8   5    7.25    0.51
   5   8   5    7.24    0.51
  -6   8   5    3.70    0.25
  -6  -8  -5    3.66    0.25
  -6   8   5    3.73    0.25
   6   8  -5    3.30    0.25
   6  -8   5    3.35    0.25
  -6   8   5    3.54    0.32
   6  -8  -5    3.31    0.26
  -6  -8   5    3.42    0.25
  -6   8  -5    4.10    0.31
  -6   8  -5    3.91    0.25
   7  -8   5   18.68    1.24
   7   8  -5   17.77    1.24
  -7  -8  -5   18.68    1.24
  -7   8   5   19.46    1.28
   7  -8  -5   17.08    1.25
  -7   8  -5   18.59    1.24
  -7   8  -5   19.25    1.28
   0   9  -5    5.01    0.31
   0   9   5    3.94    0.32
   0   9  -5    4.52    0.30
   0   9   5    4.15    0.30
   0   9  -5    4.27    0.30
  -1   9   5   11.46    0.84
   1   9  -5   13.10    0.84
   1   9  -5   11.48    0.83
   1   9  -5   13.13    0.83
  -1   9   5   11.67    0.84
   1   9  -5   12.58    0.84
  -1   9  -5   14.29    0.84
  -1   9  -5   11.99    0.83
   1   9   5   11.97    0.84
  -1   9  -5   14.21    0.90
   1   9   5   11.13    0.83
  -1   9  -5   11.57    0.83
   2   9  -5    2.14    0.15
   2   9  -5    1.97    0.15
  -2   9   5    1.94    0.15
  -2   9   5    1.86    0.16
  -2   9  -5    1.90    0.14
  -2   9  -5    2.20    0.15
   2   9   5    1.93    0.14
   2  -9  -5    2.11    0.14
   2   9   5    1.64    0.14
   2   9   5    1.84    0.14
   3   9  -5    0.28    0.06
   3   9  -5    0.31    0.04
  -3   9   5    0.37    0.15
  -3   9   5    0.28    0.04
  -3   9   5    0.34    0.05
   3   9  -5    0.28    0.05
  -3   9  -5    0.39    0.05
  -3   9  -5    0.40    0.12
   3   9   5    0.33    0.04
   3   9   5    0.33    0.05
  -3   9  -5    0.30    0.05
   3   9   5    0.36    0.05
  -3   9  -5    0.40    0.05
   4   9  -5    4.17    0.29
   4   9  -5    4.12    0.30
  -4   9   5    4.24    0.38
  -4  -9  -5    3.95    0.29
  -4   9   5    4.03    0.29
  -4   9  -5    4.82    0.29
   4   9   5    3.93    0.29
  -4   9  -5    4.42    0.29
   4   9   5    3.89    0.29
  -4   9  -5    4.11    0.29
  -5   9   5   13.21    0.94
  -5   9   5   13.43    0.94
   5   9  -5   12.54    0.95
  -5   9   5   13.03    1.05
   5   9  -5   13.55    0.94
   5  -9  -5   13.35    0.95
  -5   9  -5   15.16    0.94
  -5   9  -5   15.47    0.94
  -5  -9   5   13.32    0.95
  -5   9  -5   15.53    1.00
  -6   9   5    6.63    0.50
   6   9  -5    6.00    0.44
  -6   9   5    6.55    0.44
   6  -9   5    6.02    0.44
  -6  -9  -5    6.78    0.44
  -6   9   5    6.53    0.45
   6  -9  -5    6.06    0.45
  -6   9  -5    7.23    0.44
  -6  -9   5    6.18    0.44
  -6   9  -5    7.20    0.50
  -7   9   5    0.83    0.13
   7  -9   5    0.77    0.06
   7   9  -5    0.78    0.06
  -7  -9  -5    0.73    0.06
  -7  -9   5    0.74    0.06
   7  -9  -5    0.73    0.07
  -7   9  -5    0.81    0.11
   0  10   5    0.04    0.02
   0  10  -5    0.04    0.02
   0  10   5   -0.01    0.03
   0  10  -5    0.05    0.02
   0  10  -5    0.00    0.02
  -1  10   5    1.36    0.12
   1  10  -5    1.52    0.11
  -1  10   5    1.59    0.12
   1  10  -5    1.64    0.12
   1  10  -5    1.31    0.11
   1  10  -5    1.57    0.12
  -1  10  -5    1.48    0.11
  -1  10  -5    1.60    0.12
   1  10   5    1.51    0.13
  -1  10  -5    1.57    0.12
   1  10   5    1.38    0.12
  -1  10  -5    1.68    0.19
  -1  10  -5    1.77    0.12
   2  10  -5   14.37    0.98
   2  10  -5   14.40    0.99
  -2  10   5   14.22    0.98
   2  10  -5   15.04    0.98
  -2  10   5   13.73    0.98
  -2  10  -5   13.67    0.98
   2  10   5   13.51    0.98
   2  10   5   12.46    0.98
  -2  10  -5   14.16    0.98
  -2  10  -5   16.42    1.04
  -2  10  -5   15.87    0.98
   2 -10  -5   14.04    0.98
  -2  10  -5   16.79    0.98
   3  10  -5    0.37    0.05
  -3  10   5    0.46    0.06
   3  10  -5    0.46    0.06
   3  10  -5    0.38    0.07
  -3  10   5    0.41    0.05
  -3  10  -5    0.45    0.05
  -3  10  -5    0.42    0.05
   3  10   5    0.36    0.05
   3  10   5    0.32    0.05
   4  10  -5    7.52    0.57
  -4  10   5    7.97    0.56
  -4  10   5    9.48    0.57
  -4  10   5    8.40    0.64
  -4  10   5    7.90    0.56
  -4 -10  -5    7.93    0.56
   4  10  -5    8.09    0.56
  -4  10  -5    7.72    0.56
  -4  10  -5    9.47    0.57
   4 -10  -5    8.12    0.58
   4  10   5    7.01    0.56
  -4  10  -5    8.45    0.56
  -4  10  -5    9.50    0.64
  -5  10   5    4.68    0.34
   5  10  -5    4.53    0.35
  -5  10   5    4.78    0.34
   5  10  -5    4.85    0.34
   5 -10   5    4.11    0.34
  -5 -10  -5    4.87    0.33
  -5  10   5    5.08    0.41
   5 -10  -5    4.63    0.35
  -5  10  -5    5.33    0.34
  -5  10  -5    5.68    0.41
  -5  10  -5    5.66    0.34
  -6  10   5    5.63    0.41
  -6  10   5    4.77    0.37
  -6  10   5    5.28    0.36
  -6 -10  -5    5.28    0.35
   6  10  -5    5.15    0.36
   6 -10   5    4.98    0.36
  -6  10  -5    5.68    0.41
   6 -10  -5    4.92    0.37
  -6  10  -5    5.60    0.36
   7 -10   5    2.66    0.18
  -7  10  -5    2.65    0.24
   0  11  -5    0.03    0.02
   0  11  -5    0.04    0.03
   0  11  -5    0.01    0.02
   0  11   5    0.01    0.02
   0  11  -5    0.01    0.02
   0  11   5    0.04    0.03
  -1  11   5   11.30    0.81
   1  11  -5   12.53    0.81
   1  11  -5   11.96    0.81
   1  11  -5   11.69    0.81
  -1  11   5   11.75    0.81
  -1  11   5   11.32    0.81
   1  11  -5   11.06    0.80
  -1  11  -5   11.60    0.81
   1 -11  -5   13.03    0.81
  -1  11  -5   12.98    0.81
  -1  11  -5   12.39    0.87
   1  11   5   13.00    0.81
  -1  11  -5   11.72    0.80
  -1  11  -5   11.73    0.81
   1  11   5   10.99    0.81
  -2  11   5   25.98    1.78
   2  11  -5   26.24    1.78
   2  11  -5   28.36    1.78
  -2  11   5   25.78    1.78
   2  11  -5   27.26    1.79
  -2  11   5   26.05    1.78
  -2  11  -5   29.64    1.78
  -2  11  -5   25.35    1.78
   2 -11  -5   25.49    1.78
  -2  11  -5   26.60    1.78
   2  11   5   23.38    1.78
  -2  11  -5   25.97    1.78
  -2  11  -5   28.89    1.85
   3  11  -5    3.11    0.21
  -3  11   5    2.77    0.21
   3  11  -5    2.90    0.22
  -3  11   5    2.76    0.21
   3  11  -5    2.83    0.21
  -3  11   5    3.07    0.21
  -3  11  -5    2.83    0.21
  -3  11  -5    3.34    0.21
  -3  11  -5    2.87    0.21
  -3  11  -5    2.81    0.20
   3  11   5    2.58    0.21
  -3  11  -5    3.30    0.28
  -4  11   5    1.76    0.14
  -4  11   5    1.54    0.12
  -4  11   5    1.47    0.12
   4  11  -5    1.51    0.12
   4  11  -5    1.45    0.14
  -4  11  -5    1.73    0.19
  -4  11  -5    1.58    0.12
   4 -11  -5    1.63    0.14
  -4  11  -5    1.81    0.12
  -4  11  -5    1.47    0.12
  -5 -11  -5    2.88    0.19
   5  11  -5    2.80    0.20
  -5  11   5    2.83    0.20
   5  11  -5    2.71    0.21
   5 -11   5    2.36    0.20
  -5  11   5    2.64    0.20
  -5  11   5    3.08    0.27
  -5  11  -5    2.87    0.20
  -5  11  -5    3.09    0.26
  -5  11  -5    3.13    0.20
   5 -11  -5    2.74    0.21
  -6  11   5    0.46    0.14
   6  11  -5    0.60    0.05
  -6  11   5    0.57    0.05
  -6 -11  -5    0.55    0.04
  -6  11   5    0.54    0.05
   6 -11   5    0.52    0.05
  -6  11  -5    0.59    0.05
  -6 -11   5    0.71    0.07
  -6  11  -5    0.58    0.10
   6 -11  -5    0.52    0.06
   6 -11  -5    0.52    0.06
   0  12  -5   13.20    0.91
   0  12  -5   14.42    0.92
   0  12   5   14.00    0.91
   0  12  -5   12.94    0.91
   0  12   5   12.92    0.91
   0  12  -5   13.40    0.91
   1  12  -5   13.01    0.92
   1  12  -5   14.26    0.93
  -1  12   5   14.03    0.92
  -1  12   5   13.75    0.92
   1  12  -5   13.51    0.92
  -1  12   5   14.20    0.92
   1  12  -5   13.88    0.92
  -1  12  -5   13.05    0.92
   1  12   5   12.87    0.92
   1  12   5   13.56    0.93
  -1  12  -5   14.97    0.93
   1 -12  -5   13.69    0.92
  -1  12  -5   13.58    0.92
  -1  12  -5   13.28    0.92
  -2  12   5    3.50    0.24
  -2  12   5    3.55    0.24
  -2  12   5    3.42    0.24
   2  12  -5    3.48    0.25
   2  12  -5    3.64    0.24
   2  12  -5    3.30    0.24
  -2  12  -5    3.36    0.24
  -2  12  -5    3.62    0.31
  -2  12  -5    3.10    0.23
   2  12   5    3.07    0.24
   2 -12  -5    3.21    0.23
  -2  12  -5    3.43    0.24
   3  12  -5    7.27    0.52
  -3  12   5    7.36    0.51
  -3  12   5    7.48    0.51
   3  12  -5    7.70    0.51
  -3  12   5    7.83    0.51
   3  12  -5    7.40    0.51
   3  12   5    6.58    0.51
  -3  12  -5    6.63    0.50
  -3  12  -5    7.25    0.51
  -3  12  -5    7.42    0.51
  -3  12  -5    8.09    0.57
  -3  12  -5    8.13    0.51
   4  12  -5    1.63    0.13
   4  12  -5    1.65    0.14
  -4  12   5    1.94    0.13
  -4  12   5    1.83    0.14
  -4  12   5    1.68    0.13
  -4  12   5    1.70    0.13
  -4  12  -5    1.41    0.12
  -4  12  -5    1.74    0.13
  -4  12  -5    1.72    0.13
   4 -12  -5    1.75    0.14
  -4  12  -5    1.84    0.19
  -4  12  -5    1.88    0.13
  -5  12   5    1.56    0.12
  -5  12   5    1.62    0.12
   5 -12   5    1.39    0.11
  -5 -12  -5    1.62    0.11
   5  12  -5    1.46    0.13
  -5  12   5    1.75    0.12
   5  12  -5    1.57    0.11
  -5  12  -5    1.71    0.12
   5 -12  -5    1.44    0.12
  -5  12  -5    1.68    0.16
   6 -12   5    0.52    0.05
   6  12  -5    0.58    0.04
  -6  12  -5    0.60    0.05
   6 -12  -5    0.49    0.06
   6 -12  -5    0.54    0.07
  -6  12  -5    0.52    0.09
   0  13   5    1.92    0.14
   0  13  -5    1.76    0.13
   0  13  -5    1.74    0.13
   0  13  -5    1.54    0.13
   0  13  -5    1.91    0.14
   0  13   5    2.05    0.14
   1  13  -5    2.99    0.22
  -1  13   5    3.28    0.22
   1  13  -5    3.18    0.22
   1  13  -5    3.13    0.23
   1  13  -5    3.02    0.22
  -1  13   5    3.21    0.22
  -1  13   5    3.25    0.22
  -1  13  -5    3.17    0.22
   1  13   5    3.07    0.22
   1 -13  -5    3.19    0.22
  -1  13  -5    3.07    0.22
  -1  13  -5    2.76    0.22
  -1  13  -5    3.41    0.23
   2  13  -5    6.88    0.45
  -2  13   5    6.64    0.45
   2  13  -5    6.02    0.44
  -2  13   5    6.72    0.45
  -2  13   5    6.63    0.45
   2  13  -5    6.59    0.45
  -2  13  -5    6.38    0.44
  -2  13  -5    6.97    0.45
  -2  13  -5    6.32    0.44
   2  13   5    5.92    0.44
  -3  13   5    5.13    0.35
  -3  13   5    4.97    0.35
  -3  13   5    5.44    0.34
   3  13  -5    4.75    0.35
   3  13  -5    4.65    0.34
   3  13   5    4.46    0.34
  -3  13  -5    5.01    0.34
  -3  13  -5    5.25    0.41
  -4  13   5    9.96    0.60
  -4  13   5    9.01    0.60
   4  13  -5    8.42    0.60
  -4  13   5    8.95    0.60
   4  13  -5    8.14    0.61
  -4  13   5    8.86    0.60
  -4  13  -5    9.07    0.60
   4 -13  -5    8.23    0.61
  -4  13  -5    8.71    0.60
  -4  13  -5    8.97    0.65
  -4  13  -5    9.46    0.60
  -5  13   5    0.46    0.04
  -5  13   5    0.50    0.05
   5  13  -5    0.45    0.04
   5 -13   5    0.41    0.04
  -5  13  -5    0.41    0.09
  -5  13  -5    0.39    0.04
   5 -13  -5    0.37    0.06
   0  14   5    3.42    0.23
   0  14  -5    3.18    0.23
   0  14  -5    3.34    0.23
   0  14  -5    3.46    0.24
   0  14  -5    2.70    0.23
   0  14   5    3.52    0.24
   1  14  -5    2.57    0.18
  -1  14   5    2.56    0.18
  -1  14   5    2.88    0.18
   1  14  -5    2.52    0.19
   1  14  -5    2.25    0.18
  -1  14  -5    2.51    0.18
  -1  14  -5    2.13    0.17
  -1  14  -5    2.65    0.18
  -1  14  -5    2.54    0.18
   1  14   5    2.45    0.18
   1 -14  -5    2.44    0.18
   2  14  -5    8.39    0.55
   2  14  -5    7.90    0.56
  -2  14   5    8.25    0.55
   2  14  -5    7.29    0.55
  -2  14   5    8.56    0.55
  -2  14   5    8.19    0.55
  -2  14  -5    8.34    0.55
  -2  14  -5    8.52    0.56
  -2  14  -5    8.55    0.55
   2  14   5    7.54    0.55
  -3  14   5    1.02    0.08
   3  14  -5    0.89    0.09
   3 -14   5    0.80    0.08
  -3  14   5    1.06    0.08
   3  14  -5    0.88    0.07
  -3  14   5    1.02    0.08
  -3  14  -5    0.95    0.08
   3 -14  -5    0.97    0.09
  -3  14  -5    0.99    0.08
  -3  14  -5    0.95    0.07
   4  14  -5    0.68    0.10
  -4  14   5    0.95    0.07
  -4  14   5    0.98    0.07
   4  14  -5    0.84    0.07
  -4  14  -5    0.93    0.07
  -4  14  -5    0.86    0.07
  -4  14  -5    0.95    0.07
   4 -14  -5    0.80    0.08
   5  14  -5    1.56    0.11
  -5  14   5    1.75    0.12
  -5  14  -5    1.62    0.12
   0  15   5    1.72    0.11
   0  15   5    1.47    0.11
   0  15  -5    1.46    0.11
   0  15  -5    1.25    0.11
   0  15  -5    1.49    0.11
   0  15  -5    1.49    0.12
  -1  15   5   10.83    0.69
   1  15  -5    9.97    0.69
   1  15  -5    8.69    0.69
  -1  15   5   11.12    0.69
   1  15  -5   10.47    0.69
   1  15  -5   10.21    0.70
   1  15   5   10.22    0.69
  -1  15  -5   10.61    0.70
  -1  15  -5   10.19    0.69
  -1  15  -5   10.17    0.69
   2  15  -5    6.15    0.45
   2  15  -5    5.74    0.45
  -2  15   5    7.24    0.45
   2  15  -5    6.83    0.45
  -2  15   5    7.22    0.45
  -2  15  -5    6.52    0.45
   2  15   5    6.62    0.45
  -2  15  -5    6.67    0.45
  -2  15  -5    6.64    0.45
   3  15  -5    1.50    0.11
  -3  15   5    1.75    0.12
  -3  15   5    1.74    0.12
   3  15  -5    1.51    0.13
  -3  15  -5    1.63    0.12
  -3  15  -5    1.63    0.11
  -3  15  -5    1.58    0.12
   3 -15  -5    1.50    0.13
   4  15  -5    0.68    0.06
  -4  15   5    0.79    0.06
  -4  15  -5    0.75    0.06
   4 -15  -5    0.76    0.11
  -4  15  -5    0.72    0.06
  -4  15  -5    0.71    0.06
   0  16  -5    0.29    0.04
   0  16  -5    0.25    0.03
   0  16   5    0.27    0.04
   0  16  -5    0.34    0.05
   0  16   5    0.38    0.04
  -1  16   5    0.98    0.08
   1  16  -5    1.00    0.08
   1  16  -5    1.04    0.08
  -1  16   5    1.01    0.08
   1  16  -5    0.91    0.08
   1  16   5    0.93    0.08
  -1  16  -5    0.96    0.07
  -1  16  -5    0.92    0.08
  -1  16  -5    1.03    0.07
  -2  16   5    3.30    0.21
  -2  16   5    3.22    0.21
   2  16  -5    3.28    0.23
  -2  16  -5    2.94    0.21
   2  16   5    2.99    0.21
   2 -16  -5    2.71    0.22
  -2  16  -5    3.06    0.21
  -2  16  -5    2.86    0.21
   3  16  -5    2.42    0.19
  -3  16   5    2.93    0.19
  -3  16   5    2.99    0.19
  -3  16  -5    2.68    0.19
  -3  16  -5    2.86    0.19
  -4  16   5    2.39    0.17
  -4  16  -5    2.55    0.18
   0  17  -5    0.34    0.04
   0  17  -5    0.27    0.04
   0  17   5    0.35    0.04
   0  17  -5    0.33    0.04
  -1  17   5    0.84    0.06
   1  17  -5    0.66    0.08
  -1  17   5    0.87    0.07
   1  17  -5    0.75    0.06
  -1  17  -5    0.69    0.07
  -1  17  -5    0.80    0.06
  -1  17  -5    0.83    0.06
  -2  17   5    8.74    0.56
  -2  17   5    8.79    0.56
  -2  17  -5    7.29    0.56
  -2  17  -5    8.17    0.55
  -2  17  -5    8.25    0.56
  -3  17   5    4.74    0.32
   0  18   5    0.08    0.02
  -1  18   5    0.57    0.05
  -1  18  -5    0.56    0.05
   0   0   6    1.28    0.11
   0   0  -6    1.54    0.53
   0   0   6    1.83    0.83
   0   0  -6    1.54    0.12
   1   0  -6    8.69    1.33
   1   0   6   12.16    0.73
   1   0   6    9.05    1.36
  -2   0  -6   11.42    1.67
   2   0   6   10.17    0.65
   2   0  -6   10.63    0.65
  -2   0   6    8.50    0.63
  -2   0  -6    7.90    0.66
   2   0  -6    8.27    1.75
   3   0  -6   14.03    1.06
   3   0   6   17.60    1.05
  -3   0  -6   14.96    1.10
   3   0   6   13.74    1.05
   3   0   6   17.43    1.08
   3   0  -6   16.16    1.06
   3   0  -6   17.25    1.12
  -3   0   6   15.07    1.05
   3   0  -6   14.06    1.06
  -3   0   6   16.61    1.06
  -3   0  -6   15.51    1.05
  -4   0   6   13.24    0.89
   4   0   6   14.13    0.89
   4   0  -6   11.87    0.88
   4   0  -6   12.91    0.89
   4   0   6   12.44    0.88
   4   0  -6   13.60    0.88
   4   0  -6   12.92    0.89
  -4   0  -6   13.82    0.88
   4   0  -6   12.39    0.89
   4   0   6   13.11    0.88
  -4   0   6   13.66    0.88
   5   0  -6   18.23    1.33
   5   0  -6   20.43    1.32
   5   0   6   21.69    1.33
  -5   0   6   19.10    1.33
  -5   0  -6   19.73    1.32
  -5   0   6   19.77    1.32
   5   0  -6   19.12    1.33
   5   0   6   19.32    1.32
   6   0  -6   17.42    1.09
  -6   0   6   16.41    1.09
  -6   0   6   14.46    1.20
  -6   0  -6   16.62    1.09
   6   0  -6   15.84    1.10
   6   0   6   17.43    1.10
   6   0  -6   15.57    1.10
  -7   0   6    0.69    0.05
   7   0  -6    0.62    0.06
   7   0  -6    0.70    0.07
  -7   0   6    0.54    0.15
  -7   0  -6    0.60    0.05
   7   0   6    0.70    0.06
   8   0  -6    3.77    0.23
  -8   0   6    3.05    0.28
   0   1  -6   43.27    3.17
   0  -1   6   52.45    3.56
   0  -1   6   47.94    3.17
   0  -1  -6   50.37    3.17
   0   1   6   42.51    3.17
   1  -1   6   39.75    3.40
   1  -1   6   49.40    2.97
   1   1  -6   43.87    3.42
  -1  -1  -6   39.57    2.97
   1   1   6   41.63    3.45
   1   1   6   51.79    2.97
   1  -1  -6   41.00    3.42
  -2   1   6    9.69    0.74
  -2  -1  -6    9.50    0.77
   2   1  -6   11.19    1.76
   2  -1   6   11.15    0.76
   2   1   6    9.55    1.76
   2  -1  -6   12.02    0.76
  -2  -1   6   10.70    0.74
   2   1   6   12.82    0.76
   2  -1  -6   10.99    1.95
  -2   1  -6   12.81    1.41
   3   1  -6    4.53    0.35
   3   1  -6    4.96    0.36
  -3   1   6    5.43    0.35
  -3  -1  -6    5.01    0.35
  -3   1   6    4.87    0.35
   3  -1   6    5.57    0.35
   3   1  -6    4.89    0.35
  -3  -1  -6    5.01    0.40
   3  -1   6    5.60    0.38
  -3  -1   6    5.20    0.35
   3  -1  -6    5.65    0.43
   3   1   6    4.87    0.35
   3  -1  -6    4.76    0.36
   3  -1  -6    4.75    0.35
  -3   1  -6    4.83    0.40
  -3  -1   6    5.75    0.35
  -3   1  -6    5.44    0.35
   4   1  -6    0.23    0.04
   4  -1   6    0.22    0.03
   4  -1   6    0.26    0.03
  -4   1   6    0.28    0.04
   4  -1   6    0.27    0.05
   4   1  -6    0.29    0.05
  -4  -1  -6    0.28    0.03
   4   1  -6    0.24    0.04
   4   1  -6    0.16    0.04
  -4   1   6    0.20    0.04
   4   1  -6    0.32    0.04
   4   1   6    0.25    0.04
   4   1   6    0.31    0.05
  -4  -1   6    0.21    0.05
  -4   1  -6    0.29    0.14
  -4  -1   6    0.27    0.03
   4  -1  -6    0.27    0.04
   4  -1  -6    0.16    0.04
   4  -1  -6    0.23    0.05
   4  -1  -6    0.16    0.04
  -4   1  -6    0.26    0.03
   4   1   6    0.19    0.03
   5   1  -6    4.30    0.31
  -5   1   6    4.42    0.30
   5   1  -6    4.19    0.31
  -5   1   6    3.84    0.41
   5  -1   6    4.66    0.31
   5   1  -6    4.18    0.31
  -5   1   6    4.32    0.31
  -5  -1  -6    4.52    0.30
   5  -1   6    4.37    0.30
   5   1  -6    4.77    0.30
   5  -1  -6    4.15    0.31
  -5   1  -6    4.38    0.37
   5   1   6    4.34    0.30
  -5  -1   6    4.55    0.30
  -5   1  -6    4.65    0.30
   5  -1  -6    4.28    0.32
   6  -1   6    2.00    0.13
  -6   1   6    1.64    0.12
   6   1  -6    1.83    0.13
   6   1  -6    1.62    0.13
  -6  -1  -6    1.68    0.12
  -6   1   6    1.55    0.24
   6  -1   6    1.75    0.13
   6   1  -6    1.67    0.14
   6  -1  -6    1.68    0.14
  -6  -1   6    1.41    0.24
   6  -1  -6    1.57    0.13
  -6  -1   6    1.75    0.12
  -6   1  -6    1.65    0.22
   6   1   6    1.67    0.13
  -6   1  -6    1.70    0.12
   7   1  -6    2.54    0.18
  -7  -1  -6    2.51    0.17
   7   1  -6    2.55    0.18
   7  -1   6    2.73    0.18
  -7   1   6    2.28    0.27
  -7   1   6    2.61    0.17
   7  -1  -6    2.36    0.18
  -7  -1   6    2.59    0.17
   7  -1  -6    2.44    0.18
   7   1   6    2.61    0.18
  -7  -1   6    2.14    0.26
  -8   1   6    2.67    0.26
   8   1  -6    3.46    0.21
   8  -1  -6    3.35    0.22
   8  -1  -6    3.00    0.21
   0   2   6    2.81    0.22
   0  -2  -6    4.69    0.97
   0  -2   6    3.34    0.91
   0   2  -6    2.95    0.22
   0   2   6    4.58    1.00
  -1  -2  -6    2.83    0.68
   1   2  -6    1.78    0.13
   1   2  -6    1.58    0.59
  -1   2   6    2.43    0.64
  -1  -2  -6    1.38    0.14
   1  -2   6    1.68    0.13
   1  -2   6    1.91    0.70
  -1  -2   6    2.04    0.62
   1   2   6    1.61    0.13
   1   2   6    1.05    0.78
   1  -2  -6    1.81    0.75
   2   2  -6   36.03    2.37
  -2   2   6   30.86    2.33
   2  -2   6   34.80    2.35
   2   2  -6   36.98    3.49
  -2  -2  -6   31.24    2.36
  -2   2  -6   39.99    2.87
   2  -2  -6   34.50    3.27
   2  -2  -6   37.55    2.35
  -2  -2   6   35.92    2.33
   2   2   6   30.99    2.33
   2  -2  -6   36.82    2.38
   3   2  -6    0.64    0.08
  -3  -2  -6    0.73    0.14
  -3   2   6    0.60    0.06
  -3   2   6    0.72    0.07
   3   2  -6    0.66    0.07
  -3  -2  -6    0.75    0.06
   3  -2   6    0.61    0.06
   3  -2   6    0.87    0.12
   3   2  -6    0.78    0.07
   3   2  -6    0.74    0.08
   3  -2   6    0.77    0.07
  -3   2  -6    0.66    0.14
   3   2   6    0.71    0.06
  -3   2  -6    0.79    0.05
   3  -2  -6    0.63    0.08
   3  -2  -6    0.76    0.08
   3  -2  -6    0.79    0.11
   3  -2  -6    0.89    0.19
  -3  -2   6    0.83    0.07
   4   2  -6    0.63    0.07
   4   2  -6    0.73    0.07
   4   2  -6    0.74    0.07
   4  -2   6    0.77    0.07
   4  -2   6    0.68    0.06
   4   2  -6    0.64    0.08
  -4  -2  -6    0.67    0.05
   4  -2   6    0.67    0.08
  -4   2   6    0.75    0.06
   4   2  -6    0.58    0.09
  -4   2   6    0.72    0.08
   4   2   6    0.82    0.07
   4   2   6    0.75    0.06
  -4  -2   6    0.68    0.06
   4  -2  -6    0.63    0.08
  -4   2  -6    0.73    0.05
   4  -2  -6    0.70    0.09
  -4  -2   6    0.58    0.10
  -4   2  -6    0.68    0.14
   4  -2  -6    0.67    0.08
  -5   2   6    7.72    0.53
   5   2  -6    7.39    0.54
   5   2  -6    7.07    0.53
   5  -2   6    7.34    0.52
  -5  -2  -6    7.87    0.52
   5  -2   6    9.04    0.52
   5   2  -6    7.36    0.53
   5   2  -6    7.94    0.52
   5  -2   6    7.82    0.53
  -5   2   6    6.60    0.62
  -5   2   6    7.56    0.52
  -5   2  -6    8.45    0.52
  -5  -2   6    7.90    0.52
   5  -2  -6    7.11    0.53
  -5   2  -6    7.90    0.58
   5   2   6    7.81    0.52
   5  -2  -6    7.74    0.54
   6   2  -6    2.54    0.19
  -6  -2  -6    2.72    0.18
   6  -2   6    2.66    0.19
   6   2  -6    2.77    0.19
  -6   2   6    2.28    0.29
  -6   2   6    2.65    0.18
  -6   2   6    2.53    0.20
   6   2  -6    2.66    0.20
   6  -2   6    3.11    0.20
   6  -2  -6    2.51    0.20
   6   2   6    2.76    0.19
  -6   2  -6    2.66    0.18
   6  -2  -6    2.42    0.19
  -6   2  -6    2.80    0.26
  -6  -2   6    2.30    0.30
  -6  -2   6    2.66    0.19
  -7   2   6    1.26    0.19
   7   2  -6    1.46    0.11
   7  -2   6    1.52    0.11
   7   2  -6    1.50    0.11
  -7  -2  -6    1.37    0.10
   7   2   6    1.66    0.11
   7  -2  -6    1.39    0.12
  -7  -2   6    1.28    0.20
  -7  -2   6    1.44    0.10
   7  -2  -6    1.45    0.11
  -8   2   6    3.80    0.32
   8  -2  -6    4.36    0.28
   8  -2  -6    3.96    0.28
   0  -3  -6   27.09    2.38
   0  -3   6   27.43    1.89
   0  -3  -6   29.40    1.90
   1   3  -6   12.34    0.81
   1   3  -6   10.20    1.39
   1  -3   6   12.48    0.80
  -1  -3  -6   11.07    0.81
   1   3   6   12.51    0.81
   1   3   6   10.36    1.63
   1  -3  -6   11.21    1.59
   2   3  -6   21.67    1.50
  -2  -3  -6   20.80    1.50
   2  -3   6   21.50    1.47
  -2   3   6   19.19    1.47
   2  -3   6   22.47    1.49
   2   3   6   19.08    1.47
  -2  -3   6   23.22    1.47
   2  -3  -6   24.57    1.49
  -2   3  -6   23.38    2.10
   2  -3  -6   24.00    1.52
   3   3  -6    4.51    0.35
   3  -3   6    5.27    0.35
   3   3  -6    5.47    0.35
   3   3  -6    4.90    0.36
   3  -3   6    5.43    0.39
  -3   3   6    4.77    0.35
  -3  -3  -6    4.90    0.40
   3   3  -6    5.25    0.35
  -3   3   6    4.78    0.34
  -3  -3  -6    4.86    0.34
  -3   3  -6    5.27    0.40
  -3   3  -6    5.18    0.35
   3   3   6    5.07    0.35
   3  -3  -6    5.43    0.38
   3  -3  -6    4.79    0.36
  -3   3  -6    5.30    0.34
   4  -3   6    0.58    0.08
   4   3  -6    0.71    0.07
   4   3  -6    0.73    0.07
  -4   3   6    0.65    0.06
   4   3  -6    0.64    0.08
  -4   3   6    0.72    0.07
  -4   3   6    0.54    0.16
   4  -3   6    0.64    0.06
   4   3  -6    0.72    0.10
  -4  -3  -6    0.65    0.05
   4  -3   6    0.77    0.08
   4   3  -6    0.59    0.06
   4  -3  -6    0.65    0.09
  -4   3  -6    0.68    0.08
  -4   3  -6    0.70    0.05
  -4  -3   6    0.77    0.07
  -4   3  -6    0.69    0.14
   4  -3  -6    0.80    0.08
   4   3   6    0.66    0.06
  -5   3   6    9.80    0.85
   5   3  -6   10.67    0.76
   5   3  -6   11.91    0.76
   5  -3   6   11.16    0.76
  -5   3   6   11.43    0.76
   5  -3   6   10.90    0.76
   5   3  -6   11.05    0.77
   5   3  -6   10.79    0.77
  -5   3   6   11.36    0.76
  -5  -3  -6   11.42    0.76
  -5   3  -6   11.88    0.75
  -5   3  -6   11.90    0.82
  -5  -3   6   11.68    0.76
   5  -3  -6   11.45    0.78
   5  -3  -6   10.42    0.76
   5   3   6   11.96    0.76
  -6   3   6   11.78    0.80
   6   3  -6   12.32    0.81
   6  -3   6   11.78    0.81
   6  -3   6   13.78    0.81
   6   3  -6   11.50    0.81
   6   3  -6   12.39    0.81
  -6  -3  -6   11.87    0.80
  -6   3   6   10.73    0.90
  -6   3   6   12.06    0.81
   6  -3  -6   11.61    0.81
   6  -3  -6   11.57    0.82
  -6  -3   6   11.67    0.80
  -6   3  -6   12.83    0.87
  -6  -3   6   10.36    0.91
   6   3   6   12.62    0.81
   7   3  -6    0.50    0.06
   7  -3   6    0.46    0.05
   7  -3   6    0.56    0.06
  -7   3   6    0.47    0.13
  -7  -3  -6    0.46    0.04
   7   3  -6    0.43    0.05
   7   3   6    0.48    0.05
  -7  -3   6    0.44    0.15
  -7   3  -6    0.48    0.15
   7  -3  -6    0.44    0.06
  -7  -3   6    0.46    0.05
   7  -3  -6    0.48    0.06
  -8   3   6    5.36    0.41
   8  -3  -6    5.72    0.37
   8  -3  -6    5.42    0.37
   0  -4  -6   70.89    5.48
   0  -4  -6   80.20    5.05
   0  -4   6   74.04    5.04
  -1  -4  -6   67.66    4.51
   1  -4   6   73.71    4.50
   1   4  -6   63.54    4.49
   1  -4  -6   61.55    5.13
   1   4   6   67.83    4.50
  -2   4   6   19.08    1.50
   2   4  -6   21.23    1.52
  -2   4   6   20.00    1.50
   2  -4   6   21.56    1.50
  -2  -4  -6   20.76    1.53
   2  -4   6   24.07    1.52
  -2  -4   6   23.87    1.50
   2  -4  -6   24.51    1.60
   2  -4  -6   25.77    1.52
  -3   4   6    0.61    0.06
   3   4  -6    0.64    0.06
   3   4  -6    0.65    0.08
   3   4  -6    0.61    0.06
  -3   4   6    0.62    0.06
  -3  -4  -6    0.67    0.06
   3   4  -6    0.63    0.08
   3  -4   6    0.80    0.08
  -3  -4   6    0.73    0.09
   3   4   6    0.70    0.06
   3  -4  -6    0.53    0.07
   3   4   6    0.71    0.06
  -3   4  -6    0.51    0.06
   3  -4  -6    0.74    0.12
  -3   4  -6    0.68    0.12
   3  -4  -6    0.83    0.22
   4  -4   6    0.66    0.08
  -4   4   6    0.67    0.06
   4   4  -6    0.60    0.08
   4   4  -6    0.64    0.07
   4   4  -6    0.56    0.06
  -4   4   6    0.41    0.07
   4  -4   6    0.58    0.06
  -4  -4  -6    0.61    0.05
   4  -4   6    0.59    0.08
  -4  -4   6    0.64    0.07
  -4   4  -6    0.61    0.19
   4  -4  -6    0.68    0.09
   4   4   6    0.57    0.07
  -4   4  -6    0.71    0.07
   5   4  -6    0.52    0.08
  -5  -4  -6    0.53    0.05
  -5   4   6    0.50    0.07
   5   4  -6    0.46    0.06
   5  -4   6    0.63    0.07
  -5   4   6    0.61    0.05
   5  -4   6    0.47    0.06
  -5   4   6    0.51    0.16
   5   4  -6    0.56    0.06
   5  -4   6    0.48    0.07
   5   4  -6    0.42    0.07
  -5  -4   6    0.55    0.06
  -5   4  -6    0.64    0.13
   5  -4  -6    0.59    0.08
   5   4   6    0.58    0.06
   5  -4  -6    0.46    0.07
   6  -4   6    2.98    0.21
  -6  -4  -6    3.03    0.20
  -6   4   6    2.69    0.31
   6   4  -6    2.92    0.21
   6   4  -6    3.09    0.21
  -6   4  -6    3.29    0.28
  -6  -4   6    3.00    0.21
   6  -4  -6    2.86    0.23
   6  -4  -6    2.90    0.22
   6   4   6    3.15    0.21
  -6  -4   6    2.61    0.32
  -7   4   6    0.43    0.12
   7  -4   6    0.54    0.07
   7   4  -6    0.49    0.05
   7   4  -6    0.49    0.05
   7  -4   6    0.45    0.05
  -7  -4  -6    0.46    0.04
   7  -4  -6    0.40    0.06
   7   4   6    0.55    0.05
  -7   4  -6    0.43    0.12
  -7  -4   6    0.35    0.04
   7  -4  -6    0.48    0.06
  -8   4   6    2.81    0.24
   8  -4  -6    2.86    0.20
   8  -4  -6    3.05    0.20
   0  -5   6    2.91    0.23
   0  -5  -6    3.27    0.24
  -1   5   6    9.00    0.59
   1  -5  -6    8.54    0.59
   1   5   6    8.63    0.59
  -2  -5  -6    0.10    0.07
   2   5  -6    0.10    0.04
   2   5  -6    0.04    0.03
  -2   5   6    0.11    0.03
   2   5  -6    0.06    0.02
   2  -5   6    0.09    0.06
   2   5  -6    0.05    0.03
   2  -5   6    0.13    0.04
  -2   5   6    0.03    0.03
   2  -5  -6    0.08    0.11
  -2   5  -6    0.05    0.03
   2  -5  -6    0.11    0.02
  -2  -5   6    0.12    0.03
   2  -5  -6    0.09    0.02
  -2   5  -6    0.05    0.02
   2   5   6    0.10    0.03
   2  -5  -6    0.12    0.06
  -2   5  -6    0.10    0.07
  -3   5   6    0.22    0.04
  -3  -5  -6    0.27    0.04
   3   5  -6    0.22    0.03
   3   5  -6    0.24    0.03
   3   5  -6    0.15    0.03
  -3   5   6    0.26    0.13
   3   5  -6    0.21    0.05
   3   5  -6    0.29    0.04
   3   5   6    0.19    0.03
  -3   5  -6    0.23    0.03
   3  -5  -6    0.11    0.05
   3   5   6    0.19    0.03
  -3   5  -6    0.25    0.10
   4   5  -6    0.42    0.07
  -4   5   6    0.40    0.16
  -4  -5  -6    0.40    0.04
   4   5  -6    0.44    0.05
   4   5  -6    0.52    0.07
  -4   5   6    0.43    0.06
   4   5  -6    0.40    0.05
   4  -5   6    0.34    0.05
  -4   5  -6    0.45    0.12
   4   5   6    0.42    0.05
  -4  -5   6    0.46    0.06
  -5   5   6    4.79    0.33
  -5   5   6    4.25    0.42
   5  -5   6    4.46    0.33
   5  -5   6    4.64    0.33
   5   5  -6    4.90    0.33
  -5  -5  -6    4.81    0.32
   5   5  -6    4.53    0.33
   5  -5  -6    4.40    0.34
  -5  -5   6    4.98    0.33
   5  -5  -6    4.74    0.35
  -5   5  -6    5.30    0.40
   5   5   6    5.18    0.33
  -6  -5  -6    5.52    0.38
   6  -5   6    5.87    0.37
  -6   5   6    5.73    0.38
  -6   5   6    4.95    0.52
   6   5  -6    5.56    0.38
  -6  -5   6    5.77    0.39
   6   5   6    5.58    0.39
   6  -5  -6    5.17    0.40
  -7  -5  -6    2.51    0.17
   7  -5   6    2.63    0.17
   7   5  -6    2.57    0.17
  -7   5   6    2.34    0.24
   7  -5  -6    2.40    0.18
   7  -5  -6    2.36    0.18
  -7   5  -6    2.56    0.22
  -7  -5   6    2.10    0.26
  -7  -5   6    2.36    0.17
   0   6   6    0.96    0.08
   0   6  -6    0.80    0.07
   0   6   6    0.76    0.07
  -1   6   6   79.78    5.27
   1   6  -6   83.28    5.27
   1   6  -6   76.94    5.27
   1  -6   6   86.08    5.27
  -1   6   6   71.66    5.27
   1   6  -6   77.37    5.27
   1   6   6   84.92    5.27
   1  -6  -6   70.24    5.27
  -1   6  -6   84.40    5.32
  -1   6  -6   86.12    5.27
  -1   6  -6   72.98    5.27
  -1   6  -6   71.69    5.27
   2   6  -6    1.36    0.12
  -2   6   6    1.44    0.12
   2   6  -6    1.65    0.13
   2   6  -6    1.72    0.13
   2   6  -6    1.79    0.12
  -2   6   6    1.55    0.13
   2   6  -6    1.52    0.12
  -2   6  -6    1.61    0.12
  -2   6  -6    1.58    0.12
   2   6   6    1.72    0.12
  -2   6  -6    1.91    0.18
  -2   6  -6    1.89    0.12
   3   6  -6    2.51    0.20
  -3   6   6    2.75    0.20
   3   6  -6    3.07    0.21
   3   6  -6    3.18    0.20
  -3  -6  -6    2.82    0.20
  -3   6   6    2.46    0.30
   3   6  -6    2.54    0.20
  -3   6  -6    3.17    0.20
  -3   6  -6    2.92    0.20
   3   6   6    3.29    0.20
   3   6   6    2.67    0.20
  -4   6   6   24.73    1.71
   4   6  -6   24.23    1.71
   4   6  -6   26.06    1.71
   4   6  -6   26.47    1.71
   4   6  -6   22.54    1.70
  -4   6   6   22.69    1.78
  -4  -6  -6   24.97    1.70
  -4   6  -6   29.03    1.77
   4   6   6   25.80    1.70
   4  -6  -6   21.93    1.71
  -4   6  -6   27.21    1.70
  -4  -6   6   26.95    1.71
   4   6   6   27.35    1.70
   5   6  -6    0.87    0.10
   5  -6   6    0.85    0.08
  -5   6   6    0.89    0.18
  -5   6   6    0.97    0.09
   5   6  -6    0.99    0.08
  -5  -6  -6    0.85    0.07
   5   6  -6    0.85    0.08
   5  -6  -6    0.94    0.10
   5   6   6    1.01    0.08
  -5  -6   6    0.95    0.08
   5  -6  -6    0.98    0.10
   6  -6   6    0.94    0.08
   6   6  -6    0.92    0.08
  -6   6   6    0.99    0.18
  -6   6   6    0.95    0.10
  -6   6   6    0.91    0.09
  -6  -6  -6    1.03    0.07
  -6   6  -6    1.07    0.08
   6  -6  -6    0.91    0.09
  -6   6  -6    1.10    0.15
   6  -6  -6    0.87    0.10
  -6  -6   6    0.81    0.19
   6   6   6    1.00    0.08
  -6  -6   6    1.00    0.08
  -7  -6  -6    0.22    0.02
   7  -6   6    0.25    0.03
  -7   6   6    0.21    0.10
   7   6  -6    0.22    0.03
  -7  -6   6    0.15    0.02
   7  -6  -6    0.16    0.04
   7  -6  -6    0.14    0.03
  -7   6  -6    0.21    0.10
   0  -7   6    0.48    0.06
   0   7  -6    0.35    0.05
   0   7   6    0.48    0.06
   0   7  -6    0.49    0.04
   0   7   6    0.41    0.06
   0   7  -6    0.39    0.05
   0   7   6    0.43    0.05
   0   7  -6    0.38    0.05
  -1   7   6    1.01    0.09
   1   7  -6    1.12    0.09
   1   7  -6    1.10    0.09
   1   7  -6    1.25    0.10
  -1   7   6    1.20    0.10
   1   7  -6    1.31    0.09
   1  -7  -6    1.12    0.09
   1  -7  -6    1.31    0.09
  -1   7  -6    1.06    0.09
  -1   7  -6    1.00    0.09
   1   7   6    1.33    0.09
   1   7   6    1.23    0.09
   2   7  -6   13.49    0.89
   2   7  -6   14.04    0.89
   2   7  -6   13.73    0.89
  -2   7   6   12.10    0.89
  -2   7   6   12.61    0.89
   2  -7  -6   13.03    0.89
  -2   7  -6   12.77    0.89
  -2   7  -6   12.55    0.89
   2   7   6   14.20    0.89
  -3   7   6    4.29    0.32
   3   7  -6    4.93    0.32
  -3   7   6    4.04    0.41
  -3  -7  -6    4.57    0.31
   3   7  -6    4.54    0.33
  -3   7   6    4.94    0.32
   3   7  -6    5.04    0.32
  -3   7  -6    4.62    0.31
   3   7   6    4.11    0.31
   4   7  -6   27.36    2.10
  -4   7   6   29.70    2.18
  -4  -7  -6   31.73    2.10
  -4   7   6   30.43    2.11
   4   7  -6   30.61    2.12
   4   7  -6   33.07    2.11
  -4   7  -6   34.81    2.10
   4   7   6   33.37    2.10
  -5   7   6    3.47    0.35
  -5   7   6    3.79    0.26
   5  -7   6    3.42    0.26
   5   7  -6    3.48    0.27
   5   7  -6    3.75    0.26
  -5  -7  -6    3.81    0.25
  -5   7  -6    3.94    0.26
  -5  -7   6    3.73    0.26
   5  -7  -6    3.41    0.27
   5   7   6    3.74    0.25
   5  -7  -6    3.65    0.27
  -6  -7  -6    0.34    0.03
  -6   7   6    0.38    0.05
  -6   7   6    0.37    0.13
  -6   7   6    0.46    0.06
   6  -7   6    0.37    0.04
   6   7  -6    0.30    0.04
  -6  -7   6    0.30    0.13
   6  -7  -6    0.33    0.05
   6   7   6    0.36    0.05
   6  -7  -6    0.29    0.06
  -6  -7   6    0.33    0.05
  -6   7  -6    0.41    0.11
  -6   7  -6    0.32    0.05
  -7   7   6    1.10    0.15
  -7  -7  -6    1.19    0.08
   7  -7   6    1.14    0.08
   7   7  -6    1.13    0.08
   7  -7  -6    1.12    0.09
  -7  -7   6    1.14    0.08
   7  -7  -6    1.06    0.10
  -7   7  -6    1.10    0.17
   0   8   6    0.70    0.09
   0   8  -6    0.75    0.06
   0   8  -6    0.73    0.06
   0   8   6    0.78    0.07
   0   8  -6    0.79    0.07
   0   8  -6    0.79    0.07
   0   8   6    0.68    0.06
   0   8  -6    0.84    0.06
  -1   8   6    4.19    0.32
  -1   8   6    4.32    0.32
   1   8  -6    4.17    0.32
   1   8  -6    4.88    0.32
   1   8  -6    4.72    0.32
   1   8  -6    4.73    0.32
  -1   8  -6    5.00    0.32
   1   8   6    4.50    0.31
  -1   8  -6    4.31    0.32
   1   8   6    4.65    0.32
   1  -8  -6    5.08    0.32
  -1   8  -6    5.12    0.38
  -1   8  -6    4.20    0.32
   2   8  -6    4.81    0.32
  -2   8   6    3.80    0.31
   2   8  -6    4.55    0.31
  -2   8   6    4.33    0.31
   2   8  -6    4.52    0.31
   2   8   6    4.91    0.30
   2   8   6    4.48    0.31
   2  -8  -6    4.19    0.30
  -2   8  -6    4.14    0.31
  -2   8  -6    4.78    0.37
  -2   8  -6    4.87    0.31
  -2   8  -6    4.05    0.31
  -3   8   6    2.44    0.18
  -3  -8  -6    2.11    0.17
  -3   8   6    2.27    0.17
   3   8  -6    2.53    0.18
   3   8  -6    2.28    0.17
   3   8  -6    2.18    0.18
  -3   8  -6    2.14    0.17
  -3   8  -6    2.23    0.17
   3   8   6    2.39    0.17
  -3   8  -6    2.71    0.24
  -3   8  -6    2.56    0.17
  -4  -8  -6   12.53    0.88
  -4   8   6   12.62    0.89
   4   8  -6   12.16    0.89
  -4   8   6   12.27    0.96
   4   8  -6   13.52    0.89
  -4   8  -6   13.84    0.88
  -4   8  -6   14.98    0.89
  -4   8  -6   12.77    0.88
   4   8   6   13.08    0.88
   5   8  -6    3.45    0.24
  -5   8   6    3.36    0.24
   5  -8   6    3.11    0.24
  -5   8   6    3.31    0.33
  -5  -8  -6    3.41    0.23
   5   8  -6    2.94    0.25
  -5   8  -6    3.99    0.24
   5  -8  -6    3.36    0.25
   5   8   6    3.22    0.23
  -6   8   6    0.74    0.08
  -6   8   6    0.85    0.07
  -6   8   6    0.84    0.15
  -6  -8  -6    0.86    0.06
   6   8  -6    0.74    0.07
   6  -8   6    0.79    0.07
  -6   8  -6    0.96    0.07
   6  -8  -6    0.70    0.08
  -6   8  -6    0.95    0.13
  -6  -8   6    0.85    0.07
  -6  -8   6    0.77    0.25
   6   8   6    0.76    0.08
   6  -8  -6    0.96    0.12
  -7  -8  -6    5.31    0.36
  -7   8   6    5.61    0.40
   7   8  -6    5.31    0.36
  -7   8  -6    5.27    0.39
  -7  -8   6    5.25    0.36
   0   9   6    0.07    0.07
   0   9   6    0.06    0.02
   0   9   6    0.06    0.02
   0   9  -6    0.06    0.02
   0   9  -6    0.08    0.03
   0   9  -6    0.07    0.02
   0   9  -6    0.08    0.02
  -1   9   6    1.26    0.11
   1   9  -6    1.36    0.10
  -1   9   6    1.17    0.10
   1   9  -6    1.16    0.11
   1   9  -6    1.36    0.10
   1   9  -6    1.18    0.10
   1   9   6    1.13    0.10
   1   9   6    1.28    0.10
   1   9   6    1.08    0.09
  -1   9  -6    1.42    0.16
   1  -9  -6    1.42    0.10
  -1   9  -6    1.28    0.10
  -1   9  -6    1.28    0.10
  -1   9  -6    1.29    0.10
   2   9  -6   11.91    0.76
   2   9  -6   11.44    0.77
  -2   9   6   10.95    0.76
  -2   9   6   10.75    0.76
   2   9  -6   11.76    0.76
   2   9   6    9.67    0.76
   2  -9  -6   11.48    0.76
   2   9   6   11.22    0.76
  -2   9  -6   12.55    0.76
  -2   9  -6   10.65    0.76
  -2   9  -6   12.28    0.82
  -2   9  -6   10.75    0.76
  -3   9   6    2.60    0.19
   3   9  -6    2.67    0.19
   3   9  -6    2.38    0.20
  -3   9   6    2.65    0.20
   3   9  -6    2.75    0.19
  -3   9  -6    2.61    0.19
   3   9   6    2.61    0.18
  -3   9  -6    2.49    0.19
  -3   9  -6    2.91    0.19
   3   9   6    2.52    0.19
  -3   9  -6    3.00    0.26
  -4   9   6    1.59    0.23
   4   9  -6    1.65    0.12
   4   9  -6    1.49    0.14
  -4   9   6    1.64    0.13
  -4  -9  -6    1.55    0.12
  -4   9  -6    1.89    0.13
  -4   9  -6    1.73    0.13
  -4   9  -6    1.91    0.20
   4   9   6    1.59    0.12
  -4   9  -6    1.52    0.13
   4   9   6    1.59    0.12
  -5   9   6    4.20    0.32
   5   9  -6    4.56    0.31
  -5   9   6    5.04    0.32
  -5   9   6    4.18    0.38
  -5  -9  -6    4.19    0.30
   5   9   6    3.73    0.30
   5  -9  -6    4.65    0.36
  -5  -9   6    4.15    0.30
  -5   9  -6    4.42    0.31
  -5   9  -6    5.05    0.42
  -6  -9  -6    4.70    0.32
  -6   9   6    4.74    0.38
  -6   9   6    4.89    0.32
   6   9  -6    4.31    0.32
   6  -9   6    4.35    0.32
  -6   9   6    4.81    0.32
  -6   9  -6    4.90    0.32
  -6   9  -6    5.03    0.37
   6  -9  -6    4.29    0.33
  -6  -9   6    4.66    0.32
  -7  -9  -6   16.41    1.07
   7   9  -6   16.58    1.07
   7  -9   6   16.71    1.07
  -7   9  -6   14.72    1.09
  -7  -9   6   15.55    1.07
   7  -9  -6   16.15    1.08
   0  10  -6    1.00    0.07
   0  10  -6    0.92    0.08
   0  10  -6    1.04    0.08
   0  10   6    0.91    0.08
   0  10  -6    0.90    0.08
   1  10  -6    7.72    0.55
   1  10  -6    8.11    0.55
   1  10  -6    8.30    0.56
  -1  10   6    7.85    0.55
   1  10  -6    8.60    0.55
  -1  10   6    7.85    0.55
  -1  10  -6    7.82    0.55
  -1  10  -6    8.36    0.61
  -1  10  -6    8.67    0.55
   1  10   6    7.34    0.55
  -1  10  -6    8.77    0.55
  -1  10  -6    7.88    0.55
   2  10  -6   24.10    1.56
   2  10  -6   23.25    1.57
  -2  10   6   22.54    1.56
  -2  10   6   22.67    1.56
   2  10  -6   23.40    1.56
  -2  10  -6   25.12    1.56
  -2  10  -6   25.06    1.62
   2  10   6   21.88    1.56
   2 -10  -6   22.87    1.56
  -2  10  -6   23.21    1.56
   2  10   6   19.85    1.56
  -2  10  -6   22.11    1.56
  -2  10  -6   25.72    1.56
   3  10  -6    3.74    0.25
  -3  10   6    3.77    0.25
   3  10  -6    3.65    0.25
   3  10  -6    3.42    0.26
  -3  10   6    3.53    0.25
  -3  10  -6    3.96    0.32
   3  10   6    3.28    0.25
  -3  10  -6    3.90    0.25
  -3  10  -6    3.40    0.25
   3  10   6    3.13    0.25
  -3  10  -6    3.54    0.25
   4  10  -6    3.55    0.29
  -4  10   6    4.01    0.28
  -4  10   6    3.82    0.36
   4  10  -6    4.05    0.28
  -4 -10  -6    3.98    0.27
  -4  10  -6    4.45    0.28
   4  10   6    3.44    0.27
  -4  10  -6    3.77    0.27
  -4  10  -6    4.02    0.27
  -4  10  -6    4.40    0.34
  -5  10   6    1.63    0.12
   5  10  -6    1.36    0.13
  -5  10   6    1.49    0.12
  -5  10   6    1.51    0.20
   5 -10   6    1.33    0.11
   5  10  -6    1.59    0.12
  -5 -10  -6    1.58    0.11
  -5  10  -6    1.67    0.12
  -5  10  -6    1.76    0.18
  -5  10  -6    1.79    0.12
   5  10   6    1.31    0.12
   5 -10  -6    1.56    0.13
   6  10  -6    1.80    0.13
  -6 -10  -6    1.86    0.13
   6 -10   6    1.75    0.13
  -6  10   6    1.92    0.14
  -6  10   6    1.92    0.13
  -6  10   6    1.95    0.22
  -6  10  -6    1.91    0.13
   6 -10  -6    1.54    0.13
   6 -10  -6    1.71    0.14
  -6 -10   6    1.84    0.13
  -6  10  -6    1.97    0.18
   0  11  -6    0.17    0.03
   0  11  -6    0.18    0.03
   0  11  -6    0.19    0.03
   0  11   6    0.21    0.04
   0  11   6    0.22    0.03
   0  11  -6    0.18    0.03
   1  11  -6    1.52    0.12
  -1  11   6    1.52    0.12
  -1  11   6    1.44    0.12
   1  11  -6    1.56    0.11
   1  11  -6    1.62    0.11
  -1  11   6    1.51    0.12
   1  11  -6    1.46    0.11
  -1  11  -6    1.51    0.11
   1 -11  -6    1.55    0.11
  -1  11  -6    1.35    0.11
  -1  11  -6    1.56    0.12
   1  11   6    1.44    0.12
  -1  11  -6    1.56    0.11
   2  11  -6    0.21    0.04
   2  11  -6    0.21    0.03
   2  11  -6    0.21    0.03
  -2  11   6    0.18    0.04
  -2  11   6    0.25    0.04
   2 -11  -6    0.19    0.03
  -2  11  -6    0.22    0.04
   2  11   6    0.11    0.03
  -2  11  -6    0.21    0.03
  -2  11  -6    0.17    0.03
  -2  11  -6    0.18    0.10
  -2  11  -6    0.15    0.03
   3  11  -6    2.77    0.19
   3  11  -6    2.77    0.21
  -3  11   6    2.91    0.20
  -3  11   6    2.56    0.19
  -3  11   6    2.68    0.20
   3  11  -6    2.79    0.20
   3  11   6    2.33    0.19
  -3  11  -6    2.78    0.19
   3  11   6    2.46    0.19
  -3  11  -6    2.98    0.20
  -3  11  -6    2.91    0.26
  -3  11  -6    2.70    0.19
  -3  11  -6    2.53    0.19
  -4 -11  -6    0.09    0.02
  -4  11   6    0.07    0.04
   4  11  -6    0.05    0.03
  -4  11  -6    0.11    0.05
  -4  11  -6    0.10    0.10
  -4  11  -6    0.07    0.02
  -4  11  -6    0.12    0.03
  -5  11   6    3.01    0.20
   5  11  -6    2.93    0.20
   5 -11   6    2.60    0.20
   5  11  -6    2.67    0.21
  -5  11   6    2.85    0.29
  -5 -11  -6    2.98    0.20
  -5  11   6    2.95    0.20
  -5  11  -6    3.11    0.20
  -5  11  -6    3.09    0.25
   5 -11  -6    2.93    0.21
  -5  11  -6    3.00    0.20
  -5  11  -6    2.65    0.20
  -6 -11  -6    0.83    0.06
   6  11  -6    0.80    0.06
  -6  11   6    0.74    0.08
  -6  11   6    0.61    0.07
   6 -11  -6    0.68    0.07
  -6  11  -6    0.80    0.10
  -6  11  -6    0.82    0.07
   0  12   6    0.86    0.07
   0  12  -6    0.82    0.07
   0  12  -6    0.79    0.08
   0  12  -6    0.78    0.07
   0  12  -6    0.79    0.07
   0  12   6    0.93    0.08
   1  12  -6    5.34    0.37
  -1  12   6    5.51    0.37
   1  12  -6    5.46    0.37
  -1  12   6    5.47    0.37
   1  12  -6    5.41    0.38
   1  12  -6    5.15    0.37
  -1  12   6    5.56    0.38
  -1  12  -6    5.22    0.37
  -1  12  -6    5.83    0.38
  -1  12  -6    5.34    0.37
   1  12   6    5.42    0.37
   1 -12  -6    5.42    0.37
  -1  12  -6    5.43    0.37
   2  12  -6    5.92    0.41
  -2  12   6    5.96    0.40
  -2  12   6    5.99    0.40
   2  12  -6    5.97    0.40
  -2  12   6    6.01    0.40
   2  12  -6    5.70    0.40
  -2  12  -6    5.81    0.40
  -2  12  -6    5.69    0.46
   2 -12  -6    5.46    0.39
  -2  12  -6    5.70    0.40
   2  12   6    5.49    0.40
  -2  12  -6    5.46    0.39
  -2  12  -6    6.22    0.40
  -3  12   6    0.60    0.07
   3  12  -6    0.58    0.06
   3  12  -6    0.61    0.08
  -3  12   6    0.66    0.07
  -3  12   6    0.50    0.06
  -3  12  -6    0.59    0.06
  -3  12  -6    0.58    0.06
  -3  12  -6    0.62    0.06
  -3  12  -6    0.65    0.06
  -3  12  -6    0.60    0.12
  -4  12   6    0.13    0.03
  -4  12   6    0.08    0.04
  -4  12   6    0.16    0.03
   4  12  -6    0.11    0.04
   4 -12   6    0.11    0.03
   4  12  -6    0.11    0.02
  -4 -12  -6    0.20    0.03
  -4  12  -6    0.16    0.03
   4 -12  -6    0.11    0.04
  -4  12  -6    0.19    0.03
  -4  12  -6    0.11    0.03
  -4  12  -6    0.16    0.07
  -4  12  -6    0.14    0.02
  -5  12   6    6.49    0.42
  -5  12   6    6.39    0.42
   5  12  -6    5.73    0.43
   5 -12   6    5.67    0.42
   5  12  -6    6.24    0.42
  -5  12   6    6.26    0.42
  -5  12  -6    6.61    0.42
   5 -12  -6    5.96    0.43
  -5  12  -6    6.40    0.46
   6 -12   6    1.26    0.10
   6  12  -6    1.36    0.09
  -6  12  -6    1.40    0.11
   6 -12  -6    1.24    0.10
   0  13   6   27.60    1.85
   0  13  -6   27.99    1.86
   0  13  -6   26.90    1.85
   0  13  -6   26.52    1.85
   0  13   6   30.65    1.85
   0  13  -6   26.00    1.85
  -1  13   6    7.17    0.49
   1  13  -6    7.40    0.49
  -1  13   6    7.29    0.49
   1  13  -6    7.27    0.48
   1  13  -6    7.08    0.48
  -1  13   6    7.54    0.49
   1  13  -6    7.02    0.48
  -1  13  -6    7.06    0.48
  -1  13  -6    6.99    0.48
  -1  13  -6    6.34    0.48
   1 -13  -6    6.87    0.48
   1  13   6    6.96    0.48
  -1  13  -6    7.47    0.49
  -2  13   6    0.10    0.04
  -2  13   6    0.13    0.03
  -2  13   6    0.09    0.03
   2  13  -6    0.12    0.04
   2  13  -6    0.14    0.03
   2  13  -6    0.13    0.04
  -2  13  -6    0.13    0.03
  -2  13  -6    0.16    0.03
  -2  13  -6    0.13    0.03
  -2  13  -6    0.13    0.03
   2  13   6    0.12    0.03
   3  13  -6    2.37    0.18
  -3  13   6    2.52    0.17
  -3  13   6    2.54    0.17
   3  13  -6    2.38    0.17
  -3  13   6    2.59    0.18
   3 -13   6    2.02    0.17
   3  13  -6    2.59    0.18
  -3  13  -6    2.53    0.17
  -3  13  -6    2.16    0.17
  -3  13  -6    2.55    0.17
   3  13   6    2.35    0.17
  -3  13  -6    2.48    0.17
   4  13  -6    0.58    0.05
  -4  13   6    0.61    0.06
   4 -13   6    0.49    0.05
  -4  13   6    0.65    0.06
   4  13  -6    0.56    0.07
   4 -13  -6    0.56    0.07
  -4  13  -6    0.70    0.06
  -4  13  -6    0.59    0.10
  -4  13  -6    0.69    0.06
  -4  13  -6    0.65    0.05
  -5 -13  -6    4.91    0.32
   5  13  -6    4.70    0.32
  -5  13   6    5.12    0.32
  -5  13   6    4.64    0.32
   5 -13   6    4.38    0.32
  -5  13  -6    4.85    0.32
   5 -13  -6    4.13    0.33
   0  14   6    0.56    0.06
   0  14  -6    0.46    0.07
   0  14   6    0.39    0.06
   0  14  -6    0.45    0.04
   1  14  -6    8.77    0.59
  -1  14   6    9.25    0.58
   1  14  -6    8.16    0.57
  -1  14   6    9.92    0.59
   1  14  -6    7.67    0.57
   1  14  -6    8.93    0.58
   1 -14  -6    8.01    0.57
  -1  14  -6    7.12    0.57
  -1  14  -6    9.07    0.58
  -1  14  -6    8.06    0.58
   2  14  -6    2.84    0.20
  -2  14   6    2.98    0.20
  -2  14   6    3.02    0.20
   2  14  -6    2.82    0.21
  -2  14   6    2.99    0.20
   2  14  -6    2.72    0.20
  -2  14  -6    2.95    0.20
  -2  14  -6    2.55    0.20
  -2  14  -6    2.96    0.20
  -2  14  -6    2.79    0.20
   2  14   6    2.73    0.20
   3  14  -6    2.57    0.20
  -3  14   6    3.02    0.20
  -3  14   6    2.89    0.20
   3  14  -6    2.57    0.19
  -3  14   6    2.91    0.20
  -3  14  -6    2.83    0.19
   3 -14  -6    2.68    0.20
  -3  14  -6    2.81    0.20
  -3  14  -6    2.84    0.19
   3  14   6    2.90    0.20
   4 -14   6    1.67    0.14
   4  14  -6    1.95    0.14
  -4  14   6    2.20    0.14
  -4  14   6    2.12    0.14
   4  14  -6    1.79    0.15
  -4  14  -6    2.05    0.14
  -4  14  -6    2.10    0.14
  -4  14  -6    2.03    0.14
   4 -14  -6    1.91    0.15
   5  14  -6    2.96    0.22
  -5  14   6    3.67    0.22
  -5  14  -6    3.01    0.22
   0  15  -6    3.81    0.28
   0  15  -6    4.07    0.28
   0  15  -6    3.46    0.27
   0  15  -6    3.95    0.27
   0  15   6    4.62    0.28
   0  15   6    4.20    0.28
  -1  15   6    1.23    0.09
   1  15  -6    0.99    0.08
   1  15  -6    1.13    0.09
   1  15  -6    1.06    0.09
  -1  15   6    1.15    0.09
   1  15  -6    1.14    0.09
  -1  15  -6    1.12    0.09
  -1  15  -6    1.18    0.08
  -1  15  -6    1.14    0.09
   1  15   6    1.17    0.09
   2  15  -6    6.72    0.51
   2  15  -6    7.68    0.52
   2  15  -6    7.24    0.52
  -2  15   6    8.13    0.52
  -2  15   6    8.26    0.52
  -2  15  -6    7.66    0.52
  -2  15  -6    7.66    0.52
   2  15   6    7.77    0.52
  -2  15  -6    7.55    0.52
  -3  15   6    5.24    0.32
   3  15  -6    4.23    0.33
  -3  15   6    5.09    0.32
   3  15  -6    4.25    0.32
  -3  15  -6    4.62    0.32
   3 -15  -6    4.45    0.32
  -3  15  -6    4.74    0.32
  -3  15  -6    4.80    0.32
   4  15  -6    0.71    0.06
  -4  15   6    0.82    0.06
  -4  15  -6    0.78    0.06
  -4  15  -6    0.84    0.06
   0  16  -6    0.48    0.04
   0  16  -6    0.34    0.04
   0  16  -6    0.36    0.05
   0  16   6    0.41    0.04
   1  16  -6    7.43    0.51
   1  16  -6    6.90    0.51
  -1  16   6    8.41    0.51
   1  16  -6    7.05    0.51
  -1  16   6    7.97    0.51
  -1  16  -6    7.49    0.51
  -1  16  -6    7.73    0.51
   1  16   6    7.82    0.51
  -1  16  -6    7.02    0.51
  -2  16   6    0.68    0.05
   2  16  -6    0.56    0.07
   2  16  -6    0.60    0.08
  -2  16   6    0.75    0.06
  -2  16  -6    0.61    0.05
   2  16   6    0.76    0.06
  -2  16  -6    0.61    0.05
   2 -16  -6    0.60    0.07
  -2  16  -6    0.60    0.06
  -3  16   6   12.88    0.82
  -3  16   6   12.53    0.82
  -3  16  -6   12.06    0.82
  -3  16  -6   11.46    0.82
  -3  16  -6   12.08    0.82
   0  17  -6    3.45    0.26
   0  17  -6    3.99    0.26
   0  17   6    4.12    0.26
   1  17  -6    6.12    0.49
   1  17  -6    7.07    0.49
  -1  17   6    8.15    0.49
   1  17   6    7.80    0.49
  -1  17  -6    7.70    0.49
  -1  17  -6    6.73    0.49
  -2  17   6    0.15    0.02
  -2  17   6    0.25    0.04
  -2  17  -6    0.18    0.03
  -2  17  -6    0.19    0.03
  -2  17  -6    0.15    0.02
   0   0   7   -0.03    0.04
   0   0  -7    0.22    0.63
   0   0   7   -0.38    0.73
   0   0  -7    0.00    0.04
   1   0   7    3.74    1.13
   1   0  -7    3.97    1.09
  -1   0  -7    5.20    1.16
   1   0  -7    5.38    0.36
   1   0   7    4.90    0.36
  -2   0   7   -0.01    0.91
   2   0  -7   -0.98    1.20
  -2   0  -7   -0.15    0.97
  -3   0   7    0.17    0.03
  -3   0   7    0.21    0.04
   3   0  -7    0.12    0.05
  -3   0  -7    0.18    0.02
   3   0   7    0.22    0.05
  -3   0  -7    0.22    0.12
   3   0   7    0.15    0.02
   3   0  -7    0.13    0.04
   3   0   7    0.21    0.03
   3   0   7    0.12    0.03
   3   0  -7    0.18    0.04
   4   0   7   14.72    0.94
  -4   0   7   14.90    0.95
  -4   0   7   14.71    0.95
   4   0  -7   13.87    0.96
   4   0  -7   12.57    0.96
   4   0  -7   13.55    0.95
  -5   0   7    5.76    0.39
   5   0  -7    5.49    0.39
  -5   0   7    5.73    0.38
  -5   0  -7    5.81    0.38
   5   0  -7    5.42    0.40
   5   0   7    5.59    0.39
  -6   0  -7    0.03    0.01
   6   0   7    0.10    0.03
  -6   0   7    0.04    0.10
   6   0  -7    0.01    0.03
   6   0   7    0.08    0.03
   6   0  -7    0.04    0.04
  -6   0   7    0.03    0.02
   6   0   7    0.07    0.03
  -7   0  -7    0.35    0.04
   7   0  -7    0.30    0.05
  -7   0   7    0.27    0.13
   7   0   7    0.35    0.04
   7   0  -7    0.29    0.05
  -7   0   7    0.38    0.04
  -8   0   7    1.98    0.21
   8   0  -7    2.62    0.16
   0   1  -7   30.31    2.29
   0   1   7   28.84    2.28
   0   1   7   39.36    2.91
   0  -1   7   36.83    2.87
   0  -1   7   31.98    2.28
   0  -1  -7   40.69    2.96
   0  -1  -7   33.61    2.29
   1  -1   7    8.09    0.54
   1   1  -7    5.72    1.48
  -1  -1  -7    7.76    0.55
   1  -1   7    6.27    1.26
   1   1   7    8.04    0.54
   1   1   7    6.48    2.05
   1  -1  -7    6.27    1.57
  -1  -1   7   10.02    1.38
   2  -1   7   20.97    1.21
  -2  -1  -7   17.17    1.22
  -2   1   7   15.60    1.19
  -2  -1   7   17.87    1.19
   2  -1  -7   19.61    2.86
  -2   1  -7   16.20    1.22
  -3   1   7    2.20    0.15
   3   1  -7    2.00    0.15
   3   1  -7    2.07    0.15
  -3  -1  -7    2.04    0.24
  -3   1   7    2.03    0.15
   3   1  -7    1.96    0.16
  -3  -1  -7    2.15    0.14
   3  -1   7    1.84    0.15
  -3  -1   7    2.24    0.15
   3  -1  -7    2.04    0.16
  -3  -1   7    2.17    0.16
   3   1   7    2.07    0.15
  -3   1  -7    2.10    0.25
   3  -1  -7    2.08    0.16
   3   1   7    2.04    0.15
  -3   1  -7    2.26    0.14
   3  -1  -7    2.09    0.16
   4   1  -7    1.06    0.09
   4  -1   7    1.34    0.11
   4   1  -7    1.15    0.12
  -4   1   7    1.21    0.10
   4   1  -7    1.27    0.10
   4  -1   7    1.17    0.09
   4  -1  -7    1.18    0.12
  -4  -1   7    1.21    0.11
  -4   1  -7    1.23    0.08
   4  -1  -7    1.11    0.11
   4  -1  -7    1.15    0.10
  -4  -1   7    1.03    0.09
  -4   1  -7    1.19    0.19
   5   1  -7    3.03    0.23
  -5   1   7    2.74    0.33
  -5   1   7    3.18    0.23
   5   1  -7    3.42    0.22
  -5  -1  -7    3.20    0.21
   5   1  -7    2.90    0.23
   5  -1   7    3.08    0.22
   5   1  -7    2.95    0.23
  -5   1   7    3.16    0.22
   5   1   7    3.12    0.22
  -5  -1   7    3.26    0.22
  -5  -1   7    3.17    0.23
  -5   1  -7    3.32    0.30
   5  -1  -7    3.14    0.23
  -5   1  -7    3.23    0.21
   5  -1  -7    3.05    0.23
   6  -1   7    1.72    0.12
  -6   1   7    1.47    0.23
   6   1  -7    1.67    0.13
  -6   1   7    1.66    0.12
   6   1  -7    1.57    0.13
  -6  -1  -7    1.70    0.11
   6  -1  -7    1.50    0.13
   6   1   7    1.75    0.12
  -6   1  -7    1.68    0.11
   6  -1  -7    1.70    0.13
  -6  -1   7    1.40    0.24
  -6  -1   7    1.64    0.12
   7   1  -7    6.29    0.42
   7   1  -7    6.11    0.42
  -7  -1  -7    6.12    0.41
   7  -1   7    6.54    0.42
  -7   1   7    6.15    0.41
  -7   1   7    5.58    0.49
  -7  -1   7    5.50    0.50
   7  -1  -7    5.88    0.42
  -7  -1   7    6.33    0.41
   7  -1  -7    5.99    0.42
   7   1   7    6.51    0.41
   8  -1   7    1.75    0.12
   8   1   7    1.75    0.12
   0  -2  -7   25.19    1.67
   0  -2  -7   25.43    2.32
   0  -2   7   22.06    1.67
   0   2  -7   27.12    2.22
   0   2   7   28.57    2.40
   0  -2   7   21.16    2.26
   1  -2   7   60.44    5.06
   1   2  -7   71.64    4.49
   1   2  -7   67.94    5.06
  -1  -2  -7   68.99    4.51
   1  -2  -7   70.72    5.30
  -1   2  -7   59.97    4.50
   1   2   7   69.08    5.24
  -2  -2  -7   30.53    2.15
  -2   2   7   29.08    2.11
   2  -2   7   37.58    2.14
   2   2   7   29.86    2.10
  -2  -2   7   33.31    2.11
  -2   2  -7   28.38    2.14
   3   2  -7   15.18    1.01
   3   2  -7   14.15    1.01
   3  -2   7   16.32    1.01
   3   2  -7   14.06    1.02
  -3  -2  -7   15.23    1.01
  -3   2   7   14.64    1.01
   3   2  -7   14.61    1.01
   3   2  -7   15.56    1.01
  -3   2   7   14.52    1.01
   3  -2   7   13.03    1.01
   3  -2  -7   14.52    1.02
   3  -2  -7   14.53    1.02
  -3   2  -7   15.64    1.01
   3   2   7   15.01    1.01
  -3  -2   7   16.26    1.01
  -3   2  -7   15.47    1.01
  -3  -2   7   16.02    1.01
  -3   2  -7   16.58    1.06
   3  -2  -7   14.05    1.01
   4   2  -7    0.78    0.11
   4  -2   7    0.80    0.07
   4  -2   7    0.99    0.09
   4   2  -7    0.88    0.09
  -4   2   7    0.94    0.09
   4   2  -7    0.85    0.08
   4   2  -7    0.81    0.08
  -4  -2  -7    0.84    0.06
   4   2  -7    0.73    0.08
  -4   2   7    0.86    0.07
   4  -2  -7    0.83    0.10
  -4   2  -7    0.88    0.06
   4  -2  -7    0.86    0.08
  -4  -2   7    0.87    0.08
  -4   2  -7    0.92    0.16
  -4  -2   7    0.97    0.10
   4   2   7    0.82    0.07
   5   2  -7   28.13    1.94
   5   2  -7   27.61    1.94
  -5   2   7   29.00    1.94
   5   2  -7   30.19    1.94
   5   2  -7   27.11    1.95
  -5   2   7   29.64    1.94
   5  -2   7   28.11    1.94
  -5  -2  -7   30.24    1.93
   5  -2   7   29.93    1.93
  -5   2   7   25.32    2.03
   5  -2  -7   28.27    1.95
  -5  -2   7   29.30    1.94
  -5   2  -7   30.78    1.99
   5  -2  -7   28.81    1.94
   5   2   7   29.67    1.94
  -5   2  -7   30.07    1.93
  -6  -2  -7    0.95    0.07
   6   2  -7    0.96    0.08
  -6   2   7    0.85    0.07
   6  -2   7    1.02    0.08
   6   2  -7    0.94    0.09
  -6   2   7    0.85    0.19
  -6  -2   7    0.79    0.20
  -6  -2   7    0.87    0.08
   6  -2  -7    0.94    0.09
   6   2   7    0.98    0.08
   6  -2  -7    0.75    0.09
  -7   2   7    2.29    0.25
   7  -2   7    2.54    0.17
  -7  -2  -7    2.48    0.16
   7   2  -7    2.63    0.18
   7   2  -7    2.36    0.17
   7  -2  -7    2.24    0.17
   7   2   7    2.66    0.17
  -7  -2   7    2.50    0.17
  -7  -2   7    2.01    0.25
   7  -2  -7    2.35    0.18
  -8   2   7    0.70    0.13
   8  -2  -7    0.84    0.06
   0  -3  -7  120.79    7.76
   0  -3  -7  121.85    8.28
   0  -3   7  108.81    8.26
   0  -3   7  111.38    7.75
  -1  -3  -7    5.56    0.42
   1  -3  -7    4.61    1.84
   1   3   7    5.84    0.41
   2   3  -7    4.00    0.31
   2   3  -7    4.24    0.30
   2   3  -7    4.01    0.30
   2  -3   7    5.06    0.30
  -2  -3  -7    4.87    0.36
   2   3  -7    4.24    0.30
  -2   3   7    3.84    0.30
  -2  -3   7    5.05    0.30
   2   3   7    4.61    0.30
   2   3   7    4.40    0.30
   2  -3  -7    4.23    0.30
  -2   3  -7    4.26    0.30
  -3   3   7    0.98    0.08
   3   3  -7    0.89    0.08
   3   3  -7    0.96    0.08
   3  -3   7    0.97    0.10
   3   3  -7    1.05    0.09
  -3   3   7    0.92    0.08
   3   3  -7    1.01    0.08
   3   3  -7    0.96    0.09
  -3  -3  -7    1.00    0.07
  -3   3  -7    0.95    0.08
  -3   3  -7    1.07    0.08
   3   3   7    1.02    0.08
  -3  -3   7    1.00    0.09
  -3   3  -7    1.11    0.16
   3  -3  -7    0.80    0.10
  -3   3  -7    1.01    0.07
   4   3  -7    4.96    0.37
   4  -3   7    4.84    0.36
   4   3  -7    5.27    0.38
   4  -3   7    5.62    0.37
   4   3  -7    5.62    0.38
   4   3  -7    5.20    0.37
  -4   3   7    5.32    0.37
  -4  -3  -7    5.61    0.36
  -4   3   7    5.36    0.36
  -4   3   7    4.54    0.45
   4  -3  -7    5.27    0.38
  -4   3  -7    5.75    0.36
   4  -3  -7    5.60    0.38
  -4  -3   7    5.42    0.37
   4   3   7    5.51    0.36
  -5   3   7   14.08    0.94
   5   3  -7   14.31    0.95
   5  -3   7   13.28    0.95
  -5  -3  -7   14.03    0.94
   5   3  -7   13.56    0.95
   5   3  -7   13.14    0.95
   5   3  -7   13.52    0.96
  -5   3   7   14.50    0.95
   5  -3   7   15.83    0.95
  -5   3   7   12.18    1.04
   5   3   7   14.47    0.94
  -5   3  -7   15.04    1.00
  -5   3  -7   14.74    0.94
   5  -3  -7   13.38    0.95
  -5  -3   7   14.11    0.94
   5  -3  -7   13.90    0.96
   6   3  -7    4.32    0.29
  -6  -3  -7    4.18    0.28
  -6   3   7    3.74    0.39
   6   3  -7    4.05    0.29
  -6   3   7    4.61    0.30
   6  -3   7    4.35    0.29
   6   3   7    4.33    0.29
  -6  -3   7    3.54    0.40
  -6  -3   7    4.14    0.29
   6  -3  -7    4.02    0.30
   6  -3  -7    3.90    0.29
  -6   3  -7    4.60    0.40
   7   3  -7    1.35    0.09
  -7   3   7    1.21    0.17
   7  -3   7    1.30    0.09
  -7  -3  -7    1.28    0.09
   7   3   7    1.36    0.09
  -7  -3   7    1.07    0.18
   7  -3  -7    1.13    0.10
  -7  -3   7    1.18    0.09
   7  -3  -7    1.22    0.10
  -8   3   7    2.96    0.29
   8  -3  -7    3.83    0.24
   0   4   7    2.64    0.18
  -1   4   7    0.61    0.06
   1   4   7    0.63    0.05
   1   4   7    0.79    0.10
  -2   4   7   17.60    1.32
   2   4  -7   19.08    1.32
   2  -4   7   22.38    1.32
  -2   4   7   17.55    1.32
  -2  -4  -7   19.87    1.36
   2   4  -7   18.92    1.33
  -2  -4  -7   19.58    1.32
   2   4  -7   17.67    1.32
   2   4  -7   19.74    1.32
   2   4  -7   19.58    1.32
   2  -4  -7   18.41    1.32
   2   4   7   20.94    1.32
  -2   4  -7   21.84    1.37
  -2   4  -7   18.88    1.32
  -2  -4   7   22.85    1.32
  -3  -4  -7   12.58    0.84
   3   4  -7   12.86    0.85
  -3   4   7   12.00    0.84
   3   4  -7   12.19    0.85
   3   4  -7   11.80    0.85
   3   4  -7   10.89    0.85
   3   4  -7   13.02    0.85
  -3   4   7   11.84    0.85
  -3  -4   7   12.36    0.85
  -3   4  -7   12.96    0.85
   3   4   7   12.88    0.84
  -3   4  -7   13.83    0.90
  -3   4  -7   13.82    0.84
   4  -4   7    0.90    0.08
  -4   4   7    0.98    0.09
  -4   4   7    0.91    0.18
   4   4  -7    0.97    0.09
   4   4  -7    1.02    0.08
   4   4  -7    0.96    0.09
  -4   4   7    1.10    0.08
   4   4  -7    1.03    0.10
  -4  -4  -7    1.06    0.08
   4  -4  -7    1.09    0.10
  -4  -4   7    1.05    0.09
   4   4   7    1.06    0.08
   4  -4  -7    1.06    0.11
  -4   4  -7    1.10    0.15
  -4   4  -7    1.09    0.09
   5  -4   7    9.86    0.60
  -5   4   7    8.56    0.59
  -5   4   7    7.59    0.68
  -5   4   7    8.85    0.59
   5   4  -7    8.37    0.60
   5   4  -7    8.29    0.59
  -5  -4  -7    8.97    0.59
   5  -4   7    7.99    0.59
   5   4  -7    8.85    0.59
   5   4   7    9.06    0.59
  -5  -4   7    8.79    0.59
   5  -4  -7    8.28    0.60
   5  -4  -7    8.65    0.61
  -5   4  -7    9.63    0.65
   6   4  -7    2.37    0.17
  -6   4   7    2.54    0.18
   6  -4  -7    2.11    0.21
  -6   4  -7    2.50    0.24
  -6  -4   7    2.69    0.19
   7   4  -7    4.83    0.29
   7  -4   7    4.71    0.30
  -7   4   7    4.14    0.36
  -7  -4  -7    4.51    0.29
   7  -4  -7    4.25    0.30
  -7   4  -7    4.17    0.35
  -7  -4   7    4.20    0.29
   7   4   7    4.55    0.30
  -7  -4   7    3.69    0.37
   7  -4  -7    4.23    0.30
   0   5   7   16.22    1.12
   0   5  -7   14.81    1.12
   0   5   7   18.83    1.12
   1   5  -7   29.48    2.05
   1   5  -7   28.65    2.05
   1   5  -7   33.76    2.05
   1   5  -7   30.84    2.05
   1   5  -7   32.38    2.05
  -1   5   7   30.07    2.05
  -1   5   7   29.02    2.05
  -1   5   7   26.58    2.05
  -1   5  -7   28.51    2.05
  -1   5  -7   31.62    2.09
   1  -5  -7   34.52    2.05
   1   5   7   33.65    2.05
   1   5   7   30.63    2.05
  -1   5  -7   28.13    2.05
   2   5  -7    4.62    0.33
  -2  -5  -7    5.01    0.32
   2   5  -7    4.80    0.33
   2   5  -7    4.55    0.34
   2   5  -7    4.92    0.33
  -2   5   7    4.48    0.33
   2   5  -7    4.12    0.33
  -2   5   7    4.48    0.33
  -2   5  -7    5.26    0.33
  -2   5  -7    4.63    0.33
  -2   5  -7    5.47    0.38
   2  -5  -7    4.68    0.33
  -2   5  -7    4.56    0.33
   2   5   7    5.47    0.33
  -3  -5  -7    9.48    0.60
  -3   5   7    7.69    0.69
   3   5  -7    9.24    0.61
   3   5  -7    8.08    0.61
   3   5  -7    9.92    0.61
  -3   5   7    8.80    0.61
   3   5  -7    9.14    0.62
   3   5  -7    8.50    0.61
   3  -5  -7    8.09    0.62
   3   5   7   10.00    0.61
  -3   5  -7    9.81    0.61
   4  -5   7    2.32    0.19
   4   5  -7    2.91    0.20
   4   5  -7    2.68    0.20
   4   5  -7    2.56    0.19
   4   5  -7    2.51    0.19
  -4   5   7    2.60    0.19
  -4   5   7    2.20    0.28
   4   5  -7    2.58    0.19
  -4  -5  -7    2.71    0.18
  -4  -5   7    2.82    0.19
   4   5   7    2.81    0.19
  -4   5  -7    2.82    0.19
  -5   5   7    5.17    0.50
   5   5  -7    5.99    0.41
   5   5  -7    5.60    0.41
  -5   5   7    6.11    0.41
   5  -5   7    5.70    0.41
  -5  -5  -7    6.10    0.40
   5   5  -7    5.66    0.42
  -5   5  -7    6.57    0.41
  -5  -5   7    5.98    0.41
   5  -5  -7    5.79    0.43
  -5   5  -7    6.82    0.48
   5  -5  -7    5.58    0.42
   5   5   7    6.43    0.41
   6  -5   7    2.19    0.15
   6   5  -7    2.05    0.15
  -6   5   7    2.03    0.16
  -6   5   7    1.88    0.24
   6   5  -7    2.01    0.15
  -6  -5  -7    2.14    0.14
   6  -5   7    2.05    0.15
  -6  -5   7    2.10    0.15
   6  -5  -7    2.10    0.17
  -6   5  -7    2.32    0.22
  -6  -5   7    1.78    0.26
  -6   5  -7    2.32    0.16
   6  -5  -7    1.91    0.16
   6   5   7    2.12    0.15
   7   5  -7    0.53    0.06
  -7   5   7    0.61    0.12
  -7  -5  -7    0.60    0.04
   7  -5   7    0.61    0.05
   7  -5  -7    0.60    0.06
  -7   5  -7    0.67    0.14
   7   5   7    0.60    0.06
   7  -5  -7    0.58    0.07
  -7  -5   7    0.54    0.05
   0   6   7   36.22    2.61
   0   6  -7   35.19    2.61
   0   6  -7   45.37    2.61
   0   6  -7   37.53    2.61
   0   6   7   40.02    2.61
   0   6   7   39.55    2.61
   1   6  -7   14.08    0.88
   1   6  -7   11.88    0.88
   1   6  -7   12.85    0.89
  -1   6   7   11.98    0.89
  -1   6   7   11.48    0.89
   1   6  -7   14.47    0.88
  -1   6  -7   12.40    0.88
   1  -6  -7   14.46    0.88
   1   6   7   14.16    0.89
  -1   6  -7   14.13    0.94
  -1   6  -7   11.94    0.88
  -1   6  -7   13.87    0.89
   2   6  -7   12.85    0.85
   2   6  -7   13.14    0.85
  -2   6   7   10.88    0.85
  -2   6   7   11.69    0.85
   2   6  -7   12.60    0.85
  -2  -6  -7   12.91    0.84
   2   6  -7   10.99    0.85
   2   6  -7   11.62    0.84
   2  -6  -7   12.31    0.84
  -2   6  -7   11.93    0.85
  -2   6  -7   13.93    0.85
   2   6   7   13.99    0.85
  -2   6  -7   12.58    0.85
  -2   6  -7   14.23    0.90
  -3   6   7    7.78    0.71
   3   6  -7    9.79    0.64
   3   6  -7    8.29    0.63
  -3   6   7    8.86    0.63
  -3   6   7    9.50    0.65
   3   6  -7    9.92    0.63
   3   6  -7    9.51    0.64
  -3  -6  -7    9.44    0.63
  -3   6  -7    8.78    0.63
  -3   6  -7    9.52    0.64
   3   6   7    9.71    0.64
  -3   6  -7   10.62    0.63
  -4   6   7    4.84    0.35
   4   6  -7    4.98    0.36
   4  -6   7    4.40    0.35
   4   6  -7    4.92    0.35
  -4   6   7    4.44    0.43
   4   6  -7    5.29    0.35
   4   6  -7    4.61    0.35
  -4  -6  -7    5.22    0.34
  -4   6  -7    5.87    0.42
  -4   6  -7    5.85    0.35
  -4  -6   7    5.05    0.35
   4  -6  -7    4.32    0.36
  -4   6  -7    5.51    0.35
   4   6   7    5.37    0.35
  -5   6   7   19.30    1.50
  -5  -6  -7   21.37    1.41
   5   6  -7   20.15    1.42
   5   6  -7   20.19    1.42
  -5   6   7   21.64    1.42
   5  -6   7   19.70    1.42
   5  -6  -7   19.44    1.42
  -5   6  -7   23.94    1.42
  -5  -6   7   21.16    1.42
   5   6   7   21.89    1.42
   5  -6  -7   20.32    1.43
  -5   6  -7   24.25    1.49
  -6   6   7    2.79    0.29
  -6  -6  -7    3.07    0.21
   6  -6   7    3.15    0.21
  -6   6   7    3.20    0.22
   6  -6   7    3.01    0.21
   6   6  -7    2.97    0.21
  -6  -6   7    3.01    0.21
  -6  -6   7    2.55    0.30
  -6   6  -7    3.44    0.21
  -6   6  -7    3.37    0.27
   6  -6  -7    2.94    0.22
   6   6   7    3.02    0.21
   6  -6  -7    2.81    0.22
  -7   6   7    2.88    0.25
  -7  -6  -7    3.07    0.19
   7   6  -7    3.02    0.20
   7  -6   7    3.06    0.20
  -7   6  -7    2.85    0.24
   7  -6  -7    2.86    0.21
  -7  -6   7    2.39    0.30
  -7  -6   7    2.78    0.20
   7  -6  -7    2.94    0.21
   0   7   7    1.08    0.08
   0  -7  -7    1.08    0.08
   0   7  -7    1.18    0.08
   0   7  -7    0.86    0.08
   0   7   7    0.89    0.11
   0   7  -7    0.98    0.09
   0   7  -7    1.18    0.08
   0   7   7    1.09    0.09
   0   7   7    1.00    0.11
  -1  -7  -7   12.41    0.78
   1   7  -7   11.64    0.78
   1   7  -7   11.01    0.78
   1   7  -7   10.56    0.78
  -1   7   7   10.07    0.78
   1   7  -7   12.82    0.78
  -1   7   7   10.64    0.78
  -1   7  -7   12.07    0.84
  -1   7  -7   12.18    0.79
   1   7   7   13.08    0.78
  -1   7  -7   10.77    0.78
   1   7   7   11.88    0.78
  -1   7  -7   10.83    0.78
   1  -7  -7   12.71    0.78
   2   7  -7    9.21    0.73
   2   7  -7   10.88    0.74
  -2   7   7   10.28    0.73
  -2  -7  -7   11.38    0.73
   2   7  -7   11.19    0.73
  -2   7   7   10.65    0.73
   2   7  -7    9.22    0.73
  -2   7  -7   10.85    0.73
  -2   7  -7   11.97    0.73
  -2   7  -7   12.11    0.79
   2   7   7   11.44    0.73
   2  -7  -7   10.65    0.73
  -2   7  -7   10.55    0.73
   3   7  -7    3.79    0.28
  -3   7   7    3.48    0.27
  -3  -7  -7    3.57    0.26
   3   7  -7    3.16    0.27
   3   7  -7    4.23    0.27
  -3   7   7    3.99    0.28
   3   7  -7    3.92    0.27
  -3   7  -7    3.89    0.27
  -3   7  -7    4.39    0.27
   3   7   7    3.89    0.27
  -4   7   7   19.67    1.30
   4  -7   7   16.80    1.30
  -4   7   7   17.86    1.37
   4   7  -7   20.62    1.30
   4   7  -7   19.17    1.31
   4   7  -7   17.04    1.29
   4   7  -7   19.44    1.30
  -4  -7  -7   19.62    1.29
  -4   7  -7   21.07    1.30
   4   7   7   20.55    1.30
  -4  -7   7   20.21    1.30
   5  -7   7    1.79    0.14
  -5   7   7    2.09    0.15
   5   7  -7    1.81    0.16
  -5  -7  -7    2.02    0.14
  -5   7   7    1.89    0.24
   5   7  -7    1.82    0.15
   5  -7  -7    1.79    0.17
  -5  -7   7    2.08    0.15
  -5   7  -7    2.26    0.15
  -5   7  -7    2.29    0.22
   5  -7  -7    1.90    0.16
   5   7   7    1.92    0.14
  -6   7   7    2.50    0.18
   6  -7   7    2.50    0.17
  -6   7   7    2.33    0.24
  -6   7   7    2.45    0.17
   6  -7   7    2.30    0.17
   6   7  -7    2.40    0.17
  -6  -7  -7    2.50    0.16
  -6  -7   7    2.05    0.26
  -6  -7   7    2.40    0.17
   6   7   7    2.38    0.17
   6  -7  -7    2.30    0.18
   6  -7  -7    2.15    0.18
  -6   7  -7    2.55    0.17
  -6   7  -7    2.60    0.22
   7  -7   7    0.16    0.03
   7   7  -7    0.21    0.02
  -7   7   7    0.16    0.08
  -7  -7  -7    0.20    0.02
   7  -7  -7    0.07    0.04
  -7  -7   7    0.16    0.03
   7  -7  -7    0.23    0.04
  -7   7  -7    0.20    0.10
   0   8   7    0.45    0.05
   0   8  -7    0.45    0.05
   0   8   7    0.53    0.08
   0   8  -7    0.56    0.05
   0   8  -7    0.49    0.06
   0  -8  -7    0.59    0.05
   0   8  -7    0.55    0.05
   0   8  -7    0.61    0.05
   0   8   7    0.50    0.06
   1   8  -7   14.98    1.01
   1   8  -7   14.85    1.02
  -1   8   7   12.65    1.01
   1   8  -7   16.07    1.01
   1   8  -7   14.55    1.01
  -1   8   7   13.86    1.01
  -1  -8  -7   17.05    1.01
   1   8   7   14.69    1.01
  -1   8  -7   15.77    1.01
   1  -8  -7   16.52    1.01
  -1   8  -7   14.10    1.01
  -1   8  -7   15.61    1.07
  -1   8  -7   14.25    1.01
   1   8   7   15.50    1.01
  -2  -8  -7   15.93    1.02
  -2   8   7   14.21    1.03
   2   8  -7   15.07    1.04
   2   8  -7   15.29    1.03
   2   8  -7   15.50    1.03
   2  -8  -7   15.76    1.03
  -2   8  -7   14.93    1.03
  -2   8  -7   15.95    1.08
  -2   8  -7   13.73    1.03
   2   8   7   15.35    1.03
  -2   8  -7   16.13    1.03
  -3   8   7    3.67    0.27
   3   8  -7    4.05    0.27
   3   8  -7    3.87    0.28
  -3   8   7    3.29    0.38
  -3   8   7    4.12    0.28
  -3  -8  -7    3.99    0.27
   3   8  -7    3.86    0.27
  -3   8  -7    3.88    0.27
  -3   8  -7    3.67    0.27
  -3   8  -7    4.23    0.27
   3   8   7    3.78    0.27
  -3   8  -7    4.25    0.34
   4   8  -7    2.57    0.19
   4  -8   7    2.16    0.18
  -4   8   7    2.36    0.28
   4   8  -7    2.56    0.18
  -4   8   7    2.52    0.18
  -4  -8  -7    2.54    0.18
   4   8  -7    2.31    0.20
  -4   8  -7    2.58    0.18
  -4   8  -7    2.90    0.25
   4   8   7    2.49    0.18
  -4   8  -7    2.89    0.18
  -5  -8  -7    1.62    0.12
   5   8  -7    1.44    0.14
   5  -8   7    1.43    0.12
  -5   8   7    1.61    0.13
   5   8  -7    1.79    0.12
   5  -8  -7    1.49    0.14
  -5  -8   7    1.71    0.13
  -5   8  -7    1.75    0.20
  -5   8  -7    1.64    0.13
   5   8   7    1.83    0.13
   6   8  -7    1.18    0.09
   6  -8   7    1.23    0.09
  -6   8   7    1.36    0.10
  -6   8   7    1.26    0.17
  -6   8   7    1.27    0.10
   6  -8   7    1.35    0.09
  -6  -8  -7    1.29    0.09
   6  -8  -7    1.44    0.13
  -6  -8   7    1.23    0.10
  -6   8  -7    1.26    0.10
   6  -8  -7    1.16    0.11
   6   8   7    1.08    0.10
  -6   8  -7    1.37    0.15
  -6  -8   7    1.14    0.22
  -7   8   7    2.08    0.22
  -7  -8  -7    2.17    0.15
   7   8  -7    2.20    0.15
   7  -8   7    2.34    0.15
  -7  -8  -7    2.45    0.15
   7  -8  -7    2.11    0.16
  -7  -8   7    2.20    0.15
   0   9  -7    1.91    0.14
   0  -9  -7    2.14    0.14
   0   9  -7    2.04    0.14
   0   9   7    1.74    0.17
   0   9   7    1.85    0.14
   0   9  -7    1.81    0.14
   0   9  -7    1.63    0.15
   1   9  -7    5.92    0.47
  -1   9   7    6.51    0.47
   1   9  -7    7.15    0.47
   1   9  -7    6.71    0.47
  -1  -9  -7    7.79    0.47
   1   9  -7    7.17    0.47
   1   9   7    6.72    0.47
  -1   9  -7    6.88    0.47
  -1   9  -7    6.97    0.53
  -1   9  -7    7.76    0.47
   1   9   7    6.02    0.47
   1  -9  -7    7.09    0.47
  -1   9  -7    7.13    0.47
  -1   9  -7    6.67    0.47
   2   9  -7    9.45    0.64
   2   9  -7   10.07    0.64
   2   9  -7    9.12    0.65
  -2  -9  -7   10.02    0.64
  -2   9   7    9.02    0.64
  -2   9   7    9.29    0.64
   2  -9  -7    9.52    0.64
   2   9   7    9.10    0.64
  -2   9  -7   10.04    0.65
  -2   9  -7    9.25    0.64
   2   9   7    9.21    0.64
  -2   9  -7    9.99    0.70
  -2   9  -7    9.41    0.64
   3   9  -7    4.13    0.28
  -3   9   7    4.36    0.29
  -3  -9  -7    4.03    0.28
   3   9  -7    4.03    0.28
  -3   9   7    3.89    0.28
   3   9  -7    3.90    0.29
   3   9   7    4.11    0.28
   3   9   7    3.92    0.28
   3   9   7    3.63    0.28
  -3   9  -7    4.44    0.28
  -3   9  -7    3.90    0.28
  -3   9  -7    4.02    0.28
  -3   9  -7    4.42    0.35
  -4  -9  -7    0.29    0.03
  -4   9   7    0.30    0.05
   4  -9   7    0.25    0.04
  -4   9   7    0.27    0.13
   4   9  -7    0.22    0.05
   4   9  -7    0.28    0.04
  -4   9  -7    0.30    0.11
   4   9   7    0.31    0.04
  -4   9  -7    0.30    0.05
   4   9   7    0.29    0.04
  -4   9  -7    0.34    0.05
  -4   9  -7    0.29    0.04
  -5   9   7    0.87    0.08
   5   9  -7    0.78    0.09
  -5  -9  -7    0.85    0.06
   5   9  -7    0.74    0.07
  -5   9   7    0.89    0.08
  -5   9   7    0.82    0.17
   5  -9   7    0.74    0.07
   5   9   7    0.76    0.07
  -5   9  -7    0.94    0.08
  -5   9  -7    0.91    0.07
  -5  -9   7    0.80    0.08
   5  -9  -7    0.78    0.09
  -5   9  -7    0.91    0.14
  -6   9   7    2.27    0.15
  -6  -9  -7    2.23    0.15
   6  -9   7    2.03    0.15
   6   9  -7    2.01    0.15
   6  -9   7    2.27    0.15
  -6   9   7    2.21    0.22
   6  -9  -7    2.00    0.16
  -6   9  -7    2.05    0.15
  -6  -9   7    2.10    0.15
  -6   9  -7    2.14    0.19
   0  10  -7    1.33    0.10
   0  10   7    1.32    0.11
   0 -10  -7    1.56    0.10
   0  10  -7    1.30    0.11
   0  10  -7    1.29    0.10
   0  10  -7    1.47    0.10
  -1  10   7   14.60    1.02
   1  10  -7   14.28    1.02
  -1  10   7   14.73    1.02
  -1 -10  -7   17.25    1.02
   1  10  -7   14.72    1.03
   1  10  -7   15.02    1.02
   1  10  -7   15.48    1.02
  -1  10  -7   15.76    1.02
  -1  10  -7   16.23    1.02
  -1  10  -7   14.71    1.02
  -1  10  -7   14.06    1.02
   1 -10  -7   16.21    1.02
   1  10   7   14.13    1.02
   2  10  -7    3.10    0.21
  -2 -10  -7    3.31    0.21
   2  10  -7    2.98    0.22
  -2  10   7    3.03    0.22
   2  10  -7    3.17    0.21
  -2  10   7    3.05    0.22
  -2  10  -7    3.43    0.21
   2  10   7    2.54    0.21
   2  10   7    2.88    0.21
  -2  10  -7    3.10    0.28
   2  10   7    2.74    0.21
  -2  10  -7    3.22    0.22
   2 -10  -7    2.97    0.21
  -2  10  -7    2.79    0.21
  -2  10  -7    3.05    0.21
  -3  10   7    1.35    0.10
  -3  10   7    1.30    0.11
   3  10  -7    1.25    0.12
   3  10  -7    1.32    0.10
  -3 -10  -7    1.29    0.09
   3  10  -7    1.16    0.10
  -3  10  -7    1.29    0.10
  -3  10  -7    1.35    0.17
  -3  10  -7    1.37    0.10
   3  10   7    1.17    0.10
   3  10   7    1.13    0.10
  -3  10  -7    1.22    0.10
   4 -10   7    0.73    0.07
   4  10  -7    0.94    0.09
   4  10  -7    0.94    0.08
  -4  10   7    0.88    0.08
  -4  10  -7    0.95    0.09
   4  10   7    0.79    0.07
  -4  10  -7    0.95    0.08
  -4  10  -7    0.90    0.08
  -4  10  -7    0.90    0.14
  -5  10   7    6.33    0.42
   5  10  -7    5.73    0.43
  -5 -10  -7    6.36    0.41
  -5  10   7    6.29    0.42
   5  10  -7    6.00    0.42
   5 -10   7    5.61    0.42
  -5  10   7    6.43    0.48
   5  10   7    5.21    0.42
  -5  10  -7    6.52    0.42
  -5  10  -7    6.39    0.42
  -5  10  -7    6.55    0.47
   5 -10  -7    6.08    0.43
  -5 -10   7    6.14    0.42
  -6 -10  -7    1.03    0.07
   6  10  -7    0.91    0.07
  -6  10   7    0.99    0.08
   6 -10   7    1.00    0.07
   6 -10   7    1.00    0.08
  -6  10   7    0.97    0.09
   6 -10  -7    0.96    0.08
  -6  10  -7    0.95    0.12
  -6  10  -7    0.90    0.08
  -6  10  -7    0.83    0.07
  -6 -10   7    0.92    0.08
   0  11  -7    6.85    0.48
   0  11   7    6.67    0.48
   0  11  -7    7.15    0.48
   0 -11  -7    7.79    0.48
   0  11  -7    6.90    0.48
   0  11  -7    6.98    0.49
   0  11   7    7.20    0.48
   1  11  -7    7.80    0.55
   1  11  -7    8.01    0.54
   1  11  -7    7.60    0.54
   1  11  -7    8.17    0.54
  -1  11   7    8.03    0.54
  -1 -11  -7    9.13    0.54
  -1  11   7    7.91    0.54
  -1  11  -7    7.82    0.54
   1  11   7    7.73    0.54
  -1  11  -7    8.06    0.54
  -1  11  -7    8.09    0.55
  -1  11  -7    7.41    0.54
   1 -11  -7    8.14    0.54
   2  11  -7    1.47    0.13
  -2  11   7    1.52    0.12
   2  11  -7    1.48    0.12
   2  11  -7    1.47    0.12
  -2  11   7    1.65    0.12
  -2 -11  -7    1.78    0.12
  -2  11  -7    1.52    0.12
  -2  11  -7    1.79    0.11
   2  11   7    1.56    0.12
  -2  11  -7    1.57    0.12
  -2  11  -7    1.57    0.11
  -2  11  -7    1.49    0.18
   2 -11  -7    1.51    0.11
  -2  11  -7    1.49    0.12
   3  11  -7    2.32    0.18
  -3  11   7    2.42    0.17
   3  11  -7    2.54    0.17
  -3 -11  -7    2.56    0.16
   3  11  -7    2.32    0.17
  -3  11   7    2.49    0.17
   3  11   7    1.98    0.17
   3  11   7    2.27    0.17
  -3  11  -7    2.40    0.17
  -3  11  -7    2.38    0.16
  -3  11  -7    2.19    0.17
  -3  11  -7    2.37    0.23
  -3  11  -7    2.41    0.17
   4  11  -7    2.18    0.16
   4  11  -7    2.12    0.17
  -4  11   7    2.19    0.16
  -4 -11  -7    2.33    0.15
  -4  11   7    2.32    0.16
   4 -11   7    1.91    0.16
  -4  11  -7    2.27    0.15
  -4  11  -7    2.38    0.16
  -4  11  -7    2.26    0.16
  -4  11  -7    2.24    0.22
  -4  11  -7    2.31    0.16
   4 -11  -7    2.24    0.18
   5  11  -7    2.65    0.20
  -5  11   7    2.89    0.20
  -5  11   7    2.89    0.20
  -5 -11  -7    2.95    0.19
   5 -11   7    2.69    0.19
   5  11  -7    2.73    0.19
  -5  11  -7    2.71    0.19
  -5  11  -7    2.81    0.24
  -5  11  -7    2.98    0.20
   5 -11  -7    2.73    0.21
   6  11  -7    0.17    0.02
   6 -11   7    0.15    0.02
  -6 -11  -7    0.24    0.03
  -6  11   7    0.17    0.03
  -6 -11  -7    0.19    0.02
  -6  11  -7    0.14    0.03
   6 -11  -7    0.14    0.03
   0 -12  -7    1.98    0.14
   0  12  -7    1.78    0.14
   0  12   7    1.94    0.14
   0  12  -7    1.87    0.14
   0  12  -7    1.80    0.13
   0  12  -7    1.80    0.14
   0  12   7    2.05    0.14
   1  12  -7    0.88    0.08
   1  12  -7    0.98    0.08
   1  12  -7    0.99    0.08
   1  12  -7    0.90    0.09
  -1 -12  -7    1.09    0.08
  -1  12   7    0.93    0.09
  -1  12   7    0.97    0.08
  -1  12   7    0.92    0.08
  -1  12  -7    0.96    0.08
  -1  12  -7    0.90    0.08
  -1  12  -7    0.89    0.08
  -1  12  -7    0.89    0.07
   1  12   7    0.95    0.08
   1 -12  -7    0.98    0.08
  -2  12   7    3.16    0.22
  -2  12   7    3.18    0.22
   2  12  -7    3.14    0.21
  -2  12   7    3.15    0.22
   2  12  -7    3.07    0.23
   2  12  -7    3.19    0.22
  -2  12  -7    2.97    0.21
   2  12   7    2.81    0.22
  -2  12  -7    3.02    0.21
  -2  12  -7    2.91    0.21
   2 -12  -7    2.96    0.21
  -2  12  -7    3.19    0.22
   3 -12   7    0.46    0.06
   3  12  -7    0.63    0.07
   3  12  -7    0.54    0.09
  -3  12   7    0.63    0.07
   3  12  -7    0.62    0.06
  -3 -12  -7    0.54    0.05
  -3  12  -7    0.55    0.16
   3  12   7    0.44    0.07
  -3  12  -7    0.66    0.07
  -3  12  -7    0.54    0.05
  -3  12  -7    0.57    0.06
  -3  12  -7    0.55    0.07
   4 -12   7    3.52    0.27
  -4  12   7    4.04    0.28
   4  12  -7    3.88    0.27
  -4 -12  -7    4.31    0.27
  -4 -12  -7    4.52    0.27
   4  12  -7    3.75    0.28
  -4  12   7    4.06    0.28
  -4  12  -7    3.87    0.32
  -4  12  -7    4.11    0.28
  -4  12  -7    4.14    0.28
   4 -12  -7    3.90    0.29
  -4  12  -7    3.73    0.27
  -4  12  -7    4.13    0.27
  -5 -12  -7    3.64    0.24
   5  12  -7    3.32    0.26
  -5  12   7    3.80    0.25
   5  12  -7    3.63    0.25
   5 -12   7    3.41    0.25
  -5 -12  -7    3.99    0.25
  -5  12   7    3.78    0.25
  -5  12  -7    3.47    0.28
   5 -12  -7    3.58    0.26
  -5  12  -7    3.57    0.25
   0  13  -7   -0.01    0.02
   0  13   7    0.02    0.02
   0  13  -7   -0.01    0.02
   0  13  -7    0.02    0.02
   0  13  -7   -0.01    0.02
   0  13   7   -0.01    0.04
   1  13  -7    4.54    0.32
   1  13  -7    4.43    0.32
   1  13  -7    4.67    0.32
  -1 -13  -7    5.43    0.32
  -1  13   7    4.89    0.33
   1  13  -7    4.52    0.33
  -1  13   7    4.98    0.33
   1  13   7    4.70    0.32
  -1  13  -7    4.69    0.33
  -1  13  -7    4.34    0.32
  -1  13  -7    4.54    0.32
  -1  13  -7    4.70    0.32
  -2  13   7    1.08    0.09
   2  13  -7    1.08    0.08
   2  13   7    0.96    0.09
  -2  13  -7    1.22    0.09
  -2  13  -7    0.91    0.09
  -2  13  -7    0.96    0.08
  -2  13  -7    1.09    0.10
  -3  13   7    3.67    0.23
   3  13  -7    3.07    0.23
  -3  13   7    3.32    0.23
  -3 -13  -7    3.45    0.22
   3  13  -7    3.24    0.23
  -3  13   7    3.31    0.23
   3  13  -7    3.02    0.22
  -3  13  -7    2.81    0.22
  -3  13  -7    3.26    0.22
  -3  13  -7    3.28    0.23
   3  13   7    3.11    0.23
  -3  13  -7    3.36    0.22
   4  13  -7    3.05    0.23
   4 -13   7    3.07    0.23
  -4  13   7    3.38    0.23
  -4  13   7    3.54    0.23
   4  13  -7    3.25    0.23
  -4  13  -7    3.36    0.23
  -4  13  -7    3.32    0.23
  -4  13  -7    3.42    0.23
   4 -13  -7    3.21    0.24
  -5  13   7    0.46    0.04
   5  13  -7    0.48    0.04
  -5 -13  -7    0.51    0.05
  -5  13   7    0.47    0.05
  -5  13  -7    0.40    0.05
   5 -13  -7    0.48    0.05
   0  14  -7    3.15    0.22
   0  14  -7    3.08    0.22
   0  14  -7    2.90    0.22
   0  14   7    3.22    0.22
   0  14  -7    3.01    0.23
   0  14   7    3.64    0.23
   0 -14  -7    3.21    0.22
   1  14  -7    3.23    0.24
   1  14  -7    3.40    0.24
   1  14  -7    3.53    0.24
  -1  14   7    3.74    0.25
  -1 -14  -7    3.78    0.25
  -1  14   7    3.97    0.25
   1  14  -7    3.44    0.25
  -1  14  -7    3.46    0.25
   1 -14  -7    3.41    0.24
   1  14   7    3.56    0.24
  -1  14  -7    3.44    0.24
  -1  14  -7    3.51    0.24
  -1  14  -7    3.22    0.24
  -2  14   7    1.61    0.11
   2  14  -7    1.43    0.11
  -2  14   7    1.67    0.11
  -2  14   7    1.62    0.11
   2  14  -7    1.49    0.11
   2  14  -7    1.41    0.12
  -2  14  -7    1.33    0.11
  -2  14  -7    1.50    0.11
   2  14   7    1.49    0.11
  -2  14  -7    1.57    0.11
  -2  14  -7    1.56    0.11
   3  14  -7    3.03    0.24
   3  14  -7    3.26    0.24
  -3  14   7    3.71    0.24
  -3  14   7    3.58    0.24
  -3  14   7    3.63    0.24
   3  14   7    3.61    0.25
   3 -14  -7    3.47    0.25
  -3  14  -7    3.38    0.24
  -3  14  -7    3.23    0.24
  -3  14  -7    3.46    0.24
  -4  14   7    0.28    0.04
   4  14  -7    0.28    0.03
   4  14  -7    0.24    0.04
  -4  14   7    0.24    0.04
   4 -14  -7    0.30    0.06
  -4  14  -7    0.25    0.04
  -4  14  -7    0.26    0.04
  -4  14  -7    0.31    0.05
   0  15  -7    0.21    0.04
   0  15   7    0.32    0.04
   0 -15  -7    0.22    0.03
   0  15  -7    0.22    0.03
   0  15   7    0.16    0.03
   0  15  -7    0.22    0.03
   0  15  -7    0.18    0.03
   1  15  -7    1.32    0.10
  -1  15   7    1.43    0.10
   1  15  -7    1.17    0.09
   1  15  -7    1.25    0.10
  -1  15   7    1.43    0.10
   1  15  -7    1.28    0.10
  -1  15  -7    1.20    0.10
  -1  15  -7    1.15    0.09
   1  15   7    1.38    0.10
  -1  15  -7    1.25    0.09
  -1  15  -7    1.37    0.10
   2  15  -7    0.82    0.07
   2  15  -7    0.72    0.06
  -2  15   7    0.88    0.07
  -2  15   7    0.88    0.07
   2  15  -7    0.77    0.07
  -2  15  -7    0.78    0.06
  -2  15  -7    0.81    0.06
  -2  15  -7    0.63    0.07
   2  15   7    0.81    0.07
  -2  15  -7    0.73    0.07
  -3  15   7    5.75    0.35
   3  15  -7    4.73    0.35
  -3  15   7    5.81    0.35
   3  15  -7    4.63    0.36
  -3  15  -7    5.16    0.36
  -3  15  -7    5.38    0.35
  -3  15  -7    5.38    0.35
   3 -15  -7    4.93    0.37
   4  15  -7    1.05    0.08
  -4  15   7    1.28    0.09
  -4  15  -7    1.16    0.09
   0  16   7    1.45    0.10
   0  16  -7    1.44    0.10
   0  16  -7    1.13    0.10
   0  16  -7    1.35    0.10
   0  16  -7    1.24    0.10
  -1  16   7    5.80    0.35
   1  16  -7    5.09    0.35
  -1  16   7    5.55    0.35
   1  16  -7    4.48    0.35
   1  16  -7    4.62    0.35
  -1  16  -7    5.17    0.35
  -1  16  -7    5.25    0.35
   1  16   7    5.44    0.35
  -1  16  -7    4.75    0.35
  -2  16   7    0.61    0.06
   2  16  -7    0.53    0.05
   2  16  -7    0.72    0.09
   2  16  -7    0.55    0.06
  -2  16   7    0.71    0.06
  -2  16  -7    0.59    0.05
  -2  16  -7    0.66    0.05
   2 -16  -7    0.66    0.07
  -2  16  -7    0.63    0.05
   2  16   7    0.70    0.06
  -3  16   7    2.47    0.16
  -3  16  -7    2.24    0.16
  -3  16  -7    2.20    0.16
  -3  16  -7    2.28    0.16
   0  17  -7    0.01    0.02
   0  17   7    0.02    0.02
   0  17  -7    0.02    0.02
  -1  17   7    1.80    0.12
   1  17  -7    1.50    0.13
  -1  17  -7    1.74    0.12
   1  17   7    1.83    0.12
  -1  17  -7    1.68    0.12
  -1  17  -7    1.53    0.12
  -2  17  -7    2.17    0.15
  -2  17  -7    1.99    0.15
  -2  17  -7    2.17    0.14
   0   0   8  199.98   15.47
   0   0   8  264.04   16.07
   1   0  -8   15.34    2.43
   1   0   8   18.86    1.24
   1   0   8   16.72    2.62
   1   0  -8   21.17    1.24
  -1   0  -8   15.91    1.25
  -2   0   8    6.41    0.42
   2   0  -8    6.37    0.43
   2   0   8    5.93    0.42
   2   0  -8    5.91    0.43
  -2   0  -8    6.56    0.42
   2   0   8    5.74    0.42
  -2   0  -8    7.15    0.49
   2   0  -8    5.92    0.43
  -3   0   8    2.86    0.19
  -3   0   8    2.79    0.19
   3   0  -8    2.64    0.20
  -3   0  -8    2.81    0.34
  -3   0  -8    2.84    0.18
   3   0   8    2.63    0.19
   3   0  -8    2.78    0.19
   3   0   8    2.65    0.19
   3   0  -8    2.57    0.20
   3   0  -8    2.48    0.21
   4   0  -8    1.47    0.12
   4   0   8    1.42    0.11
  -4   0  -8    1.46    0.10
  -4   0   8    1.51    0.12
   4   0  -8    1.25    0.13
   4   0   8    1.29    0.10
  -4   0   8    1.43    0.10
   4   0  -8    1.31    0.11
   4   0  -8    1.32    0.12
   5   0  -8    0.02    0.04
   5   0   8    0.00    0.03
  -5   0   8    0.01    0.04
   5   0   8    0.02    0.02
   5   0  -8    0.00    0.03
  -5   0   8   -0.02    0.02
   5   0   8    0.02    0.03
  -5   0  -8    0.01    0.01
   6   0   8    5.59    0.36
  -6   0   8    5.16    0.36
   6   0  -8    4.85    0.36
   6   0  -8    5.43    0.36
  -6   0   8    4.68    0.48
   7   0  -8    0.24    0.03
  -7   0   8    0.23    0.12
   7   0  -8    0.23    0.05
  -7   0   8    0.24    0.03
   7   0   8    0.29    0.04
   0   1   8   42.01    3.36
   0  -1  -8   36.54    2.47
   0   1  -8   33.32    2.47
   0  -1   8   33.07    2.47
   0  -1   8   37.73    3.30
   0  -1  -8   40.23    3.25
   1  -1   8   22.01    2.70
   1   1  -8   25.04    3.39
  -1   1   8   18.55    1.35
  -1  -1  -8   22.79    1.39
  -1  -1   8   17.73    1.35
   1   1   8   17.70    1.35
  -1   1  -8   21.20    1.38
   1  -1  -8   21.58    2.65
   2  -1   8   25.38    1.86
  -2   1   8   27.07    1.86
   2   1  -8   26.96    1.86
   2  -1   8   25.22    1.86
   2   1  -8   26.69    1.86
   2   1  -8   28.36    1.86
  -2  -1  -8   27.92    1.86
  -2   1   8   27.09    1.86
  -2  -1  -8   31.53    1.92
  -2   1  -8   31.10    1.86
   2  -1  -8   25.84    1.86
   2   1   8   27.33    1.86
  -2   1  -8   31.58    1.92
   2   1   8   27.52    1.86
  -2  -1   8   29.10    1.86
   2  -1  -8   26.36    1.86
   2   1   8   25.55    1.86
  -2   1  -8   28.83    1.85
  -3   1   8    6.87    0.45
   3   1  -8    6.42    0.45
   3  -1   8    6.07    0.44
  -3   1   8    6.53    0.44
  -3  -1  -8    6.92    0.44
   3  -1   8    6.11    0.44
   3   1  -8    6.30    0.45
   3   1  -8    6.66    0.45
   3   1  -8    6.61    0.45
   3  -1  -8    6.41    0.45
  -3   1  -8    7.01    0.44
  -3   1  -8    6.90    0.51
   3   1   8    6.20    0.44
  -3  -1   8    6.83    0.45
   3  -1  -8    6.38    0.45
   3  -1  -8    6.27    0.45
   3   1   8    6.59    0.44
   3  -1  -8    6.38    0.46
  -3  -1   8    6.94    0.45
  -4   1   8    0.79    0.08
  -4   1   8    0.67    0.06
   4   1  -8    0.76    0.08
   4  -1   8    0.67    0.06
   4   1  -8    0.75    0.08
  -4  -1  -8    0.76    0.06
   4   1  -8    0.66    0.10
   4   1  -8    0.70    0.08
   4  -1   8    0.70    0.06
   4   1  -8    0.70    0.07
   4  -1  -8    0.64    0.07
  -4   1  -8    0.79    0.05
  -4   1  -8    0.77    0.17
  -4  -1   8    0.75    0.08
  -4  -1   8    0.80    0.06
   4   1   8    0.67    0.06
   4  -1  -8    0.78    0.09
   5   1  -8    0.63    0.07
  -5   1   8    0.63    0.18
   5   1  -8    0.63    0.07
   5  -1   8    0.78    0.07
  -5  -1  -8    0.77    0.05
  -5   1   8    0.76    0.08
  -5   1   8    0.68    0.06
   5   1  -8    0.52    0.08
   5   1   8    0.70    0.06
   5  -1  -8    0.68    0.09
  -5  -1   8    0.71    0.06
  -5   1  -8    0.73    0.05
   5  -1  -8    0.73    0.08
  -5  -1   8    0.73    0.09
   6   1  -8    0.34    0.07
   6  -1   8    0.37    0.06
  -6   1   8    0.31    0.07
  -6   1   8    0.31    0.16
   6   1  -8    0.33    0.06
   6  -1  -8    0.33    0.06
  -6  -1   8    0.33    0.05
  -6   1  -8    0.36    0.03
  -6   1  -8    0.32    0.04
  -6  -1   8    0.23    0.14
   6  -1  -8    0.31    0.07
   7   1  -8    0.93    0.09
  -7  -1  -8    1.16    0.08
   7  -1   8    1.07    0.08
  -7   1   8    1.04    0.17
   7   1  -8    1.00    0.08
  -7  -1   8    1.01    0.17
   7  -1  -8    1.12    0.09
  -7  -1   8    1.11    0.08
   7   1   8    1.23    0.08
   7  -1  -8    0.95    0.09
   0  -2  -8   61.91    3.98
   0  -2   8   56.25    3.97
  -1   2   8   23.18    1.79
  -1  -2  -8   31.11    1.83
   1   2   8   23.83    1.79
   1   2   8   31.39    1.81
  -1  -2   8   24.07    1.79
  -2   2   8    1.67    0.13
   2   2  -8    1.76    0.13
  -2  -2  -8    1.80    0.12
  -2  -2  -8    2.00    0.21
  -2   2   8    1.58    0.12
   2  -2   8    1.43    0.12
   2   2  -8    1.64    0.13
   2   2  -8    1.61    0.13
   2   2  -8    1.66    0.14
  -2   2   8    1.68    0.15
   2  -2  -8    1.58    0.13
  -2  -2   8    1.76    0.13
   2  -2  -8    1.58    0.12
   2   2   8    1.81    0.12
  -2   2  -8    1.98    0.12
  -2   2  -8    1.72    0.12
   2  -2  -8    1.66    0.14
   3   2  -8    2.61    0.19
  -3   2   8    2.69    0.19
   3   2  -8    2.81    0.20
   3  -2   8    2.42    0.19
   3   2  -8    2.66    0.20
   3   2  -8    2.68    0.20
  -3   2   8    2.75    0.20
  -3  -2  -8    2.88    0.19
   3   2  -8    2.83    0.20
  -3  -2   8    2.90    0.19
   3  -2  -8    2.47    0.20
  -3  -2   8    2.98    0.20
   3  -2  -8    2.66    0.20
  -3   2  -8    2.89    0.26
  -3   2  -8    2.92    0.19
   3  -2  -8    2.52    0.20
   3   2   8    2.74    0.19
   4   2  -8    3.38    0.24
   4   2  -8    3.23    0.25
   4  -2   8    3.13    0.24
  -4  -2  -8    3.51    0.23
   4   2  -8    3.20    0.24
   4   2  -8    3.57    0.24
  -4   2   8    3.49    0.24
  -4   2   8    3.39    0.24
  -4  -2   8    3.61    0.24
   4  -2  -8    3.24    0.25
   4   2   8    3.46    0.24
  -4  -2   8    3.82    0.25
   4  -2  -8    3.40    0.25
  -4   2  -8    3.64    0.23
  -4   2  -8    3.84    0.34
   4  -2  -8    2.83    0.25
   5   2  -8    7.45    0.52
   5  -2   8    7.81    0.51
  -5   2   8    6.60    0.62
   5   2  -8    7.02    0.53
  -5  -2  -8    7.97    0.51
   5   2  -8    7.43    0.53
   5   2  -8    7.82    0.52
   5  -2   8    7.27    0.52
  -5   2   8    7.65    0.52
  -5   2   8    7.89    0.52
   5   2   8    7.79    0.52
  -5  -2   8    7.82    0.52
   5  -2  -8    7.41    0.53
  -5   2  -8    8.41    0.52
  -5   2  -8    8.04    0.58
  -5  -2   8    7.60    0.53
   5  -2  -8    7.37    0.53
  -5   2  -8    7.90    0.51
   6  -2   8    2.53    0.18
   6   2  -8    2.15    0.17
  -6   2   8    2.34    0.18
  -6   2   8    2.24    0.16
  -6   2   8    2.48    0.38
   6   2  -8    2.33    0.16
   6   2  -8    2.41    0.18
  -6  -2   8    2.53    0.17
   6   2   8    2.29    0.17
   6  -2  -8    1.94    0.18
   6  -2  -8    2.16    0.18
  -6   2  -8    2.37    0.16
  -6  -2   8    2.11    0.32
  -7   2   8    0.83    0.15
   7  -2   8    0.97    0.07
  -7  -2  -8    0.90    0.07
   7   2  -8    0.83    0.07
  -7  -2  -8    0.90    0.06
   7  -2  -8    0.75    0.07
  -7  -2   8    0.97    0.07
   7  -2  -8    0.86    0.08
  -7  -2   8    0.77    0.15
   7   2   8    0.90    0.07
   0   3   8    0.12    0.03
   0  -3  -8    0.17    0.06
   0  -3   8    0.18    0.06
  -1  -3  -8    1.76    0.11
  -1   3   8    1.74    0.12
   1   3  -8    1.76    0.12
   1   3  -8    1.58    0.12
   1   3  -8    1.52    0.12
  -1   3   8    1.40    0.12
   1   3   8    1.68    0.12
   1  -3  -8    1.69    0.12
   2   3  -8    4.46    0.31
  -2   3   8    4.07    0.31
  -2   3   8    4.36    0.31
  -2   3   8    4.11    0.30
  -2  -3  -8    4.57    0.30
   2   3  -8    3.95    0.31
   2   3  -8    4.39    0.31
  -2  -3  -8    5.08    0.38
   2   3  -8    4.20    0.31
   2   3  -8    4.44    0.31
   2  -3  -8    4.28    0.32
  -2  -3   8    4.79    0.31
   2  -3  -8    4.31    0.30
  -2   3  -8    4.39    0.30
  -2   3  -8    4.80    0.36
   2   3   8    4.76    0.30
  -3   3   8    2.88    0.21
   3   3  -8    2.79    0.21
   3   3  -8    3.08    0.21
   3  -3   8    2.54    0.21
  -3   3   8    2.76    0.20
   3   3  -8    2.73    0.22
   3   3  -8    2.82    0.21
   3   3  -8    3.08    0.21
  -3  -3  -8    3.03    0.20
  -3   3  -8    2.91    0.21
  -3   3  -8    3.25    0.27
  -3   3  -8    3.33    0.20
   3  -3  -8    2.70    0.21
   3   3   8    3.16    0.21
  -3  -3   8    3.14    0.21
   4   3  -8   52.55    3.34
   4   3  -8   47.10    3.35
   4   3  -8   47.17    3.34
   4   3  -8   46.31    3.34
   4  -3   8   43.23    3.34
  -4   3   8   48.68    3.33
  -4  -3  -8   50.84    3.33
  -4   3   8   49.85    3.34
   4   3   8   49.91    3.34
  -4   3  -8   55.81    3.39
  -4  -3   8   50.64    3.34
  -4   3  -8   55.84    3.33
  -4  -3   8   51.97    3.34
   4  -3  -8   49.18    3.35
   4  -3  -8   48.38    3.34
   5   3  -8    4.30    0.31
   5  -3   8    4.31    0.31
   5   3  -8    4.63    0.31
   5  -3   8    4.72    0.30
  -5   3   8    4.31    0.30
  -5  -3  -8    4.61    0.30
  -5   3   8    3.74    0.40
  -5   3   8    4.61    0.31
   5  -3  -8    4.38    0.32
  -5  -3   8    4.52    0.31
  -5   3  -8    4.84    0.37
  -5   3  -8    4.75    0.30
   5   3   8    4.39    0.31
   5  -3  -8    4.19    0.32
   6  -3   8    2.03    0.16
  -6   3   8    2.09    0.28
   6   3  -8    2.27    0.15
  -6  -3  -8    1.99    0.14
  -6   3   8    1.95    0.16
   6   3  -8    2.08    0.15
   6  -3  -8    2.07    0.16
   6   3   8    2.27    0.15
   6  -3  -8    2.05    0.16
  -6  -3   8    1.94    0.16
  -6  -3   8    1.84    0.27
  -6   3  -8    2.28    0.22
  -7  -3  -8    0.73    0.05
   7  -3   8    0.80    0.06
   7   3  -8    0.71    0.06
  -7  -3  -8    0.83    0.06
  -7   3   8    0.69    0.13
   7  -3  -8    0.68    0.07
   7   3   8    0.82    0.06
  -7  -3   8    0.77    0.06
   7  -3  -8    0.65    0.07
  -7  -3   8    0.57    0.14
   0   4  -8    0.10    0.02
   0   4   8    0.03    0.03
   0   4   8    0.08    0.03
   0   4  -8    0.12    0.03
   0  -4   8    0.11    0.06
   0   4  -8    0.05    0.02
  -1  -4  -8    0.22    0.03
  -1   4   8    0.14    0.03
   1   4  -8    0.21    0.03
   1   4  -8    0.13    0.04
   1   4  -8    0.16    0.03
  -1   4   8    0.18    0.03
   1   4  -8    0.28    0.04
   1   4  -8    0.15    0.03
   1   4   8    0.26    0.04
   1  -4  -8    0.19    0.03
   1   4   8    0.17    0.03
  -1   4  -8    0.21    0.03
  -1   4  -8    0.18    0.07
  -1   4  -8    0.13    0.02
  -1   4  -8    0.09    0.03
   1   4   8    0.12    0.03
  -2   4   8   10.25    0.74
   2   4  -8   10.78    0.74
   2   4  -8   11.19    0.74
   2   4  -8   10.70    0.74
  -2   4   8   10.33    0.74
  -2  -4  -8   11.22    0.73
  -2   4   8    9.90    0.73
   2   4  -8   10.28    0.74
   2   4  -8   11.19    0.74
   2  -4  -8    9.85    0.74
  -2   4  -8   11.97    0.79
  -2   4  -8   11.27    0.74
  -2   4  -8   10.18    0.74
  -2  -4   8   11.67    0.74
  -2   4  -8   10.85    0.74
   2   4   8   12.38    0.74
   2  -4  -8   10.87    0.73
  -2   4  -8   11.73    0.74
   3   4  -8    2.28    0.18
   3   4  -8    2.38    0.18
  -3   4   8    2.30    0.17
  -3  -4  -8    2.48    0.17
   3   4  -8    2.26    0.18
   3   4  -8    2.39    0.18
   3   4  -8    2.56    0.18
  -3   4   8    2.25    0.18
  -3   4  -8    2.45    0.17
  -3   4  -8    2.56    0.18
  -3  -4   8    2.54    0.18
  -3   4  -8    2.79    0.24
   3  -4  -8    2.11    0.19
  -3   4  -8    2.69    0.17
   3   4   8    2.64    0.17
   4   4  -8   41.11    2.86
   4   4  -8   41.83    2.87
  -4  -4  -8   42.90    2.85
  -4   4   8   41.74    2.85
  -4   4   8   42.10    2.86
   4  -4   8   37.47    2.85
   4   4  -8   43.85    2.86
  -4   4   8   36.64    2.93
   4   4  -8   38.78    2.86
  -4   4  -8   45.97    2.86
  -4  -4   8   42.98    2.86
  -4  -4   8   44.61    2.86
   4  -4  -8   40.85    2.86
   4   4   8   44.63    2.85
   4  -4  -8   42.97    2.87
  -4   4  -8   48.37    2.91
  -4   4  -8   43.56    2.86
  -4   4  -8   46.94    2.85
  -5   4   8    1.90    0.14
   5   4  -8    1.78    0.13
   5  -4   8    1.70    0.13
   5   4  -8    1.67    0.14
  -5   4   8    1.74    0.13
  -5   4   8    1.69    0.24
  -5  -4  -8    1.90    0.13
   5   4  -8    1.71    0.15
  -5   4  -8    1.97    0.20
   5   4   8    1.96    0.13
   5  -4  -8    1.78    0.15
  -5  -4   8    1.85    0.14
   5  -4  -8    1.89    0.15
   6   4  -8    5.47    0.37
   6   4  -8    5.57    0.37
  -6   4   8    5.69    0.38
  -6  -4  -8    5.57    0.37
   6  -4   8    5.68    0.37
  -6   4   8    5.02    0.46
   6   4   8    5.84    0.37
  -6  -4   8    5.41    0.37
  -6  -4   8    4.65    0.47
   6  -4  -8    5.33    0.38
   6  -4  -8    5.37    0.38
  -6   4  -8    5.74    0.42
  -7   4   8    1.47    0.17
   7  -4   8    1.66    0.11
  -7  -4  -8    1.53    0.10
   7  -4  -8    1.50    0.11
   7  -4  -8    1.44    0.11
   7   4   8    1.47    0.11
  -7  -4   8    1.24    0.19
  -7  -4   8    1.46    0.11
   0   5  -8    0.61    0.07
   0   5  -8    0.66    0.07
   0   5  -8    0.75    0.07
   0   5   8    0.77    0.08
   0   5   8    0.82    0.07
   0  -5  -8    0.83    0.06
   0   5  -8    0.59    0.07
   0   5   8    0.85    0.07
   0   5  -8    0.89    0.06
  -1  -5  -8   26.80    1.63
   1   5  -8   26.60    1.64
  -1   5   8   22.17    1.64
   1   5  -8   23.03    1.64
   1   5  -8   22.08    1.64
  -1   5   8   25.08    1.64
   1   5  -8   25.69    1.64
   1   5  -8   24.55    1.64
   1   5  -8   23.16    1.64
  -1   5  -8   22.84    1.64
   1   5   8   27.58    1.64
   1  -5  -8   26.19    1.63
  -1   5  -8   24.22    1.68
  -1   5  -8   23.37    1.64
  -1   5  -8   23.13    1.64
   1   5   8   23.49    1.64
  -1   5  -8   24.91    1.64
  -2   5   8    3.34    0.24
   2   5  -8    3.32    0.24
  -2  -5  -8    3.63    0.23
  -2   5   8    3.29    0.24
   2   5  -8    3.44    0.24
   2   5  -8    3.02    0.24
   2   5  -8    3.57    0.24
   2   5  -8    3.40    0.24
  -2   5  -8    3.17    0.23
  -2   5  -8    3.54    0.24
  -2   5  -8    3.18    0.23
   2  -5  -8    3.38    0.23
  -2   5  -8    3.24    0.24
   2  -5  -8    3.04    0.26
   2   5   8    3.81    0.24
  -2   5  -8    3.74    0.29
   3   5  -8    0.20    0.04
  -3   5   8    0.26    0.13
  -3   5   8    0.20    0.04
   3  -5   8    0.26    0.05
   3   5  -8    0.22    0.05
  -3  -5  -8    0.22    0.04
  -3   5  -8    0.34    0.14
   3   5   8    0.30    0.04
  -3  -5   8    0.27    0.04
  -3   5  -8    0.18    0.05
  -3   5  -8    0.32    0.05
   3  -5  -8    0.20    0.05
   4   5  -8    4.44    0.33
   4  -5   8    4.17    0.31
  -4   5   8    3.93    0.40
  -4   5   8    4.54    0.32
   4   5  -8    4.32    0.31
   4   5  -8    4.68    0.31
  -4  -5  -8    4.86    0.31
   4   5  -8    4.11    0.31
   4   5   8    4.89    0.31
   4  -5  -8    4.18    0.32
  -4  -5   8    4.61    0.31
   4  -5  -8    4.50    0.33
  -4   5  -8    5.28    0.31
  -4   5  -8    4.87    0.31
   5   5  -8   13.11    0.91
  -5  -5  -8   13.79    0.91
   5   5  -8   13.96    0.92
   5  -5   8   13.04    0.92
  -5   5   8   12.04    1.00
  -5   5   8   14.14    0.92
   5   5  -8   13.19    0.93
  -5   5  -8   14.42    0.92
   5  -5  -8   13.24    0.93
   5   5   8   14.27    0.92
  -5  -5   8   13.28    0.92
   5  -5  -8   12.65    0.92
  -5   5  -8   15.31    0.98
  -6   5   8    2.20    0.26
   6  -5   8    2.49    0.17
   6   5  -8    2.46    0.17
  -6  -5  -8    2.45    0.17
  -6   5   8    2.55    0.18
   6   5  -8    2.50    0.17
   6   5   8    2.50    0.17
   6  -5  -8    2.45    0.18
  -6  -5   8    2.06    0.27
   6  -5  -8    2.40    0.18
  -6  -5   8    2.29    0.17
  -6   5  -8    2.64    0.23
  -7   5   8    5.44    0.44
  -7  -5  -8    6.26    0.39
  -7  -5  -8    5.68    0.38
   7  -5   8    5.98    0.39
   7   5   8    5.59    0.39
  -7  -5   8    5.50    0.39
   7  -5  -8    5.62    0.39
   0  -6  -8    0.58    0.06
   0   6  -8    0.39    0.05
   0   6   8    0.42    0.05
   0  -6  -8    0.43    0.04
   0   6   8    0.46    0.06
   0   6  -8    0.42    0.04
   0   6  -8    0.45    0.04
   0   6  -8    0.39    0.05
   0   6  -8    0.39    0.05
   0   6  -8    0.33    0.05
   0   6   8    0.36    0.05
  -1  -6  -8    3.04    0.19
  -1   6   8    2.62    0.19
   1   6  -8    2.61    0.19
   1   6  -8    2.31    0.19
   1   6  -8    2.65    0.19
   1   6  -8    3.03    0.19
  -1   6   8    2.67    0.19
   1   6  -8    2.50    0.19
   1   6  -8    2.87    0.19
  -1   6  -8    2.66    0.24
   1  -6  -8    3.01    0.19
  -1   6  -8    2.58    0.19
   1   6   8    3.01    0.19
  -1   6  -8    2.79    0.19
  -1   6  -8    2.34    0.19
  -1   6  -8    2.54    0.19
  -2   6   8   15.28    1.09
  -2   6   8   14.85    1.09
   2   6  -8   15.78    1.08
   2   6  -8   16.46    1.09
  -2  -6  -8   17.09    1.08
   2   6  -8   15.98    1.09
   2   6  -8   16.36    1.09
   2   6  -8   14.31    1.09
  -2   6  -8   17.07    1.09
  -2   6  -8   17.13    1.14
  -2   6  -8   15.53    1.08
   2  -6  -8   15.91    1.08
  -2   6  -8   16.41    1.08
   2   6   8   17.71    1.09
  -3   6   8    1.41    0.12
   3   6  -8    1.38    0.11
   3  -6   8    1.25    0.11
  -3  -6  -8    1.55    0.11
   3   6  -8    1.52    0.13
  -3   6   8    1.63    0.15
   3   6  -8    1.46    0.11
   3   6  -8    1.49    0.11
   3   6  -8    1.62    0.12
  -3  -6   8    1.64    0.13
  -3   6  -8    1.47    0.12
   3  -6  -8    1.19    0.15
   3   6   8    1.59    0.11
  -3   6  -8    1.45    0.11
  -3   6  -8    1.68    0.18
  -3   6  -8    1.65    0.12
   4   6  -8    4.98    0.36
   4  -6   8    4.45    0.34
   4   6  -8    4.82    0.34
   4   6  -8    4.53    0.34
  -4   6   8    4.98    0.35
   4   6  -8    4.90    0.34
  -4  -6  -8    5.15    0.34
  -4   6   8    4.34    0.43
   4   6  -8    5.33    0.35
  -4   6  -8    5.76    0.41
   4   6   8    5.05    0.34
  -4   6  -8    5.57    0.34
   4  -6  -8    4.59    0.35
  -4   6  -8    5.19    0.34
  -4  -6   8    5.07    0.34
   5   6  -8    5.03    0.37
   5   6  -8    5.03    0.38
   5  -6   8    5.07    0.37
  -5   6   8    4.94    0.46
  -5   6   8    5.69    0.37
  -5  -6  -8    5.59    0.36
   5   6  -8    5.38    0.37
  -5  -6   8    5.38    0.37
   5  -6  -8    5.37    0.39
   5   6   8    5.60    0.37
  -5   6  -8    5.93    0.37
   5  -6  -8    5.02    0.38
  -5   6  -8    6.00    0.43
   6  -6   8    6.32    0.43
   6   6  -8    6.35    0.42
  -6   6   8    6.03    0.49
  -6   6   8    6.69    0.43
  -6  -6  -8    6.56    0.42
  -6  -6   8    6.09    0.42
   6  -6  -8    6.20    0.44
   6   6   8    6.36    0.42
   6  -6  -8    6.04    0.43
  -6  -6   8    5.40    0.51
  -6   6  -8    6.64    0.47
  -7   6   8    4.28    0.34
  -7  -6  -8    4.65    0.29
   7  -6   8    4.43    0.29
   7  -6  -8    4.39    0.30
   7  -6  -8    4.23    0.30
  -7  -6   8    3.86    0.29
   0  -7  -8    6.06    0.38
   0   7  -8    6.41    0.38
   0   7  -8    6.43    0.39
   0   7   8    4.82    0.39
   0   7  -8    5.24    0.39
   0   7   8    5.75    0.39
   0   7   8    5.25    0.39
   0   7  -8    5.32    0.39
  -1   7   8   16.49    1.24
  -1   7   8   17.23    1.24
   1   7  -8   17.69    1.24
   1   7  -8   17.98    1.24
   1   7  -8   18.29    1.24
   1   7  -8   19.69    1.24
   1   7  -8   17.62    1.24
  -1  -7  -8   20.71    1.24
   1  -7  -8   19.88    1.24
   1   7   8   19.42    1.24
   1   7   8   20.66    1.24
  -1   7  -8   18.09    1.29
  -1   7  -8   17.35    1.24
  -1   7  -8   18.57    1.24
  -1   7  -8   17.05    1.24
   2   7  -8    9.91    0.74
  -2   7   8   10.58    0.74
   2   7  -8   11.32    0.74
  -2  -7  -8   11.60    0.73
  -2   7   8   11.09    0.74
   2   7  -8   10.68    0.75
  -2   7  -8   11.24    0.79
   2  -7  -8   10.94    0.74
  -2   7  -8   10.68    0.74
   2   7   8   11.48    0.74
  -2   7  -8   10.81    0.74
  -3   7   8    3.21    0.23
   3   7  -8    3.38    0.22
   3   7  -8    3.18    0.22
   3  -7   8    2.63    0.22
  -3   7   8    3.02    0.22
   3   7  -8    2.66    0.21
   3   7  -8    3.05    0.23
   3   7  -8    2.79    0.22
  -3  -7  -8    3.24    0.21
  -3   7   8    2.72    0.34
  -3   7  -8    3.44    0.22
   3   7   8    3.24    0.22
  -3   7  -8    3.43    0.28
  -3   7  -8    3.13    0.22
  -3   7  -8    3.22    0.22
   4   7  -8    1.43    0.11
   4   7  -8    1.16    0.10
   4   7  -8    1.25    0.10
   4   7  -8    1.28    0.12
   4  -7   8    1.07    0.10
  -4   7   8    1.22    0.21
  -4   7   8    1.42    0.11
  -4  -7  -8    1.31    0.09
  -4   7  -8    1.50    0.10
  -4   7  -8    1.44    0.17
   4  -7  -8    1.13    0.14
  -4   7  -8    1.51    0.11
  -4  -7   8    1.27    0.11
   4   7   8    1.35    0.10
   5   7  -8    2.44    0.20
  -5  -7  -8    2.57    0.18
   5   7  -8    2.67    0.19
  -5   7   8    2.58    0.19
   5  -7   8    2.42    0.19
  -5   7  -8    2.85    0.19
   5  -7  -8    2.57    0.20
  -5   7  -8    2.89    0.26
   5   7   8    2.69    0.20
   5  -7  -8    2.43    0.21
  -6   7   8    2.36    0.17
   6  -7   8    2.35    0.16
   6   7  -8    2.28    0.16
  -6   7   8    2.37    0.17
  -6  -7  -8    2.34    0.16
  -6   7   8    2.15    0.23
   6  -7   8    2.29    0.16
   6  -7  -8    2.16    0.17
   6  -7  -8    2.34    0.18
  -6   7  -8    2.31    0.21
  -6  -7   8    2.00    0.25
   6   7   8    2.67    0.16
  -6  -7   8    2.33    0.16
  -6   7  -8    2.33    0.17
   6   7   8    2.27    0.16
  -7   7   8    0.03    0.08
  -7  -7  -8    0.01    0.01
   7  -7   8   -0.01    0.02
  -7  -7  -8    0.03    0.01
   7  -7  -8    0.03    0.02
  -7  -7   8    0.02    0.02
   0   8  -8    0.20    0.04
   0   8  -8    0.26    0.04
   0   8  -8    0.17    0.04
   0   8   8    0.21    0.04
   0  -8  -8    0.22    0.03
   0   8   8    0.33    0.05
   0   8  -8    0.20    0.03
   0   8  -8    0.24    0.03
   1   8  -8   23.17    1.56
  -1  -8  -8   26.72    1.56
   1   8  -8   25.28    1.56
   1   8  -8   22.52    1.56
  -1   8   8   19.83    1.56
   1   8  -8   21.23    1.56
  -1   8   8   22.54    1.56
   1   8  -8   24.04    1.56
  -1   8  -8   22.89    1.56
   1   8   8   23.57    1.56
  -1   8  -8   22.64    1.56
   1   8   8   24.16    1.56
  -1   8  -8   23.50    1.56
  -2   8   8    6.80    0.50
  -2   8   8    7.15    0.50
   2   8  -8    7.29    0.50
   2   8  -8    7.12    0.51
  -2  -8  -8    7.80    0.50
   2   8  -8    7.71    0.50
  -2   8  -8    7.47    0.56
   2  -8  -8    7.35    0.50
  -2   8  -8    7.59    0.50
   2   8   8    7.89    0.50
  -2   8  -8    7.12    0.50
   2   8   8    7.35    0.50
  -2   8  -8    6.96    0.50
   3   8  -8    1.81    0.15
   3   8  -8    2.08    0.17
  -3   8   8    2.29    0.17
  -3  -8  -8    2.18    0.15
   3   8  -8    2.22    0.16
   3   8  -8    2.14    0.16
  -3   8   8    2.10    0.16
  -3   8  -8    2.35    0.22
   3   8   8    2.12    0.15
  -3   8  -8    1.97    0.16
  -3   8  -8    2.40    0.16
  -3   8  -8    2.11    0.15
   4   8  -8    7.21    0.50
  -4  -8  -8    7.58    0.49
   4  -8   8    6.50    0.50
  -4   8   8    6.67    0.58
  -4   8   8    7.46    0.50
   4   8  -8    7.34    0.50
   4   8  -8    7.06    0.51
  -4   8  -8    8.00    0.50
  -4   8  -8    7.40    0.50
  -4  -8   8    7.26    0.50
  -4   8  -8    7.97    0.56
   4   8   8    7.10    0.50
  -5   8   8    0.17    0.04
   5   8  -8    0.26    0.04
  -5  -8  -8    0.21    0.02
   5  -8   8    0.21    0.04
  -5   8   8    0.16    0.10
   5   8  -8    0.12    0.04
   5  -8  -8    0.17    0.04
   5   8   8    0.22    0.03
  -5  -8   8    0.21    0.03
  -5   8  -8    0.17    0.10
   5   8   8    0.17    0.03
  -5   8  -8    0.20    0.03
  -6  -8  -8    1.63    0.11
   6   8  -8    1.60    0.11
  -6   8   8    1.71    0.12
   6  -8   8    1.61    0.11
  -6   8   8    1.66    0.12
   6  -8   8    1.64    0.11
  -6   8   8    1.59    0.18
  -6  -8   8    1.39    0.27
   6  -8  -8    1.83    0.18
  -6   8  -8    1.55    0.16
  -6  -8   8    1.55    0.12
   6  -8  -8    1.53    0.12
  -6   8  -8    1.63    0.12
   6   8   8    1.44    0.12
   7  -8   8    0.33    0.04
  -7  -8  -8    0.39    0.03
  -7  -8  -8    0.33    0.03
  -7  -8   8    0.36    0.05
   7  -8  -8    0.40    0.04
   0   9  -8   17.61    1.20
   0   9   8   15.51    1.20
   0   9  -8   19.26    1.20
   0   9   8   17.37    1.21
   0  -9  -8   20.23    1.20
   0   9  -8   17.44    1.20
   0   9  -8   17.35    1.20
   1   9  -8    4.58    0.31
  -1   9   8    4.47    0.32
   1   9  -8    4.84    0.31
   1   9  -8    4.37    0.31
  -1  -9  -8    5.18    0.31
   1   9  -8    4.25    0.32
  -1   9   8    4.23    0.32
  -1   9  -8    4.24    0.31
   1   9   8    4.60    0.32
  -1   9  -8    5.13    0.31
   1  -9  -8    4.91    0.31
  -1   9  -8    4.49    0.31
  -1   9  -8    4.50    0.32
   1   9   8    4.08    0.31
  -2  -9  -8    2.38    0.15
   2   9  -8    2.14    0.17
   2   9  -8    2.26    0.16
   2   9  -8    2.25    0.16
  -2   9   8    2.17    0.16
  -2   9   8    2.10    0.16
  -2   9  -8    2.38    0.16
  -2   9  -8    2.20    0.16
   2   9   8    2.06    0.15
  -2   9  -8    2.23    0.22
   2   9   8    2.04    0.16
   2  -9  -8    2.26    0.16
  -2   9  -8    2.16    0.16
   3   9  -8    0.35    0.05
  -3  -9  -8    0.26    0.03
   3  -9   8    0.30    0.05
   3   9  -8    0.39    0.06
   3   9  -8    0.35    0.04
  -3   9   8    0.34    0.05
  -3   9   8    0.31    0.05
  -3   9  -8    0.33    0.05
   3   9   8    0.32    0.05
  -3   9  -8    0.33    0.04
   3   9   8    0.32    0.04
   3   9   8    0.30    0.04
  -3   9  -8    0.28    0.04
  -3   9  -8    0.28    0.10
   4   9  -8    3.30    0.25
  -4   9   8    3.58    0.24
   4   9  -8    3.40    0.24
   4  -9   8    3.10    0.24
  -4  -9  -8    3.57    0.23
  -4   9  -8    3.68    0.30
   4   9   8    3.29    0.23
  -4   9  -8    3.65    0.24
   4   9   8    3.32    0.24
  -4   9  -8    3.56    0.24
   5  -9   8    0.63    0.06
  -5  -9  -8    0.72    0.05
   5   9  -8    0.67    0.06
  -5   9   8    0.71    0.07
   5   9  -8    0.63    0.07
  -5   9   8    0.64    0.17
  -5  -9   8    0.79    0.07
   5   9   8    0.62    0.06
  -5   9  -8    0.71    0.06
  -5   9  -8    0.69    0.11
   5  -9  -8    0.67    0.08
   6  -9   8    0.80    0.06
  -6   9   8    0.88    0.08
  -6   9   8    0.69    0.16
  -6   9   8    0.92    0.07
   6   9  -8    0.78    0.06
   6  -9   8    0.84    0.06
  -6  -9  -8    0.90    0.06
  -6   9  -8    0.76    0.08
  -6  -9   8    0.86    0.08
   6  -9  -8    0.77    0.07
  -6   9  -8    0.76    0.11
   0  10  -8    0.02    0.02
   0  10  -8    0.02    0.02
   0  10   8    0.05    0.03
   0 -10  -8    0.04    0.02
   0  10  -8    0.03    0.02
   0  10  -8    0.00    0.02
   1  10  -8   19.02    1.32
  -1  10   8   19.53    1.31
   1  10  -8   18.69    1.31
   1  10  -8   19.69    1.31
   1  10  -8   20.26    1.31
  -1  10   8   20.34    1.31
  -1  10  -8   19.39    1.31
   1 -10  -8   20.36    1.31
  -1  10  -8   20.37    1.31
  -1  10  -8   19.37    1.32
   1  10   8   19.17    1.31
  -1  10  -8   20.62    1.31
   1  10   8   16.91    1.31
  -1  10  -8   19.63    1.31
   2  10  -8    3.25    0.24
   2  10  -8    3.25    0.23
  -2 -10  -8    3.65    0.22
  -2  10   8    3.33    0.23
  -2  10   8    3.19    0.23
   2  10  -8    3.10    0.23
  -2 -10  -8    3.75    0.22
  -2  10  -8    3.28    0.23
   2  10   8    3.01    0.23
   2 -10  -8    3.19    0.22
  -2  10  -8    3.03    0.23
   2  10   8    3.05    0.23
  -2  10  -8    3.47    0.22
   2  10   8    2.69    0.22
  -2  10  -8    3.15    0.28
  -2  10  -8    3.22    0.23
   3 -10   8    0.70    0.07
   3  10  -8    0.82    0.07
   3  10  -8    0.92    0.08
   3  10  -8    0.89    0.09
  -3  10   8    0.90    0.09
  -3  10   8    0.89    0.08
  -3 -10  -8    0.94    0.06
  -3  10  -8    0.87    0.07
  -3  10  -8    0.86    0.13
   3  10   8    0.77    0.07
   3  10   8    0.68    0.06
  -3  10  -8    0.86    0.07
   3  10   8    0.87    0.08
  -3  10  -8    0.75    0.07
  -4  10   8    1.74    0.13
  -4 -10  -8    1.65    0.11
   4 -10   8    1.45    0.12
   4  10  -8    1.66    0.13
  -4  10  -8    1.56    0.13
   4 -10  -8    1.88    0.16
  -4  10  -8    1.62    0.13
  -4  10  -8    1.66    0.12
   4  10   8    1.43    0.12
  -5  10   8    0.59    0.06
  -5 -10  -8    0.62    0.04
   5  10  -8    0.60    0.07
   5 -10   8    0.53    0.05
   5  10  -8    0.54    0.05
  -5  10   8    0.60    0.06
  -5 -10   8    0.58    0.07
   5  10   8    0.51    0.05
  -5  10  -8    0.60    0.05
   5 -10  -8    0.62    0.07
  -5  10  -8    0.58    0.10
  -5  10  -8    0.59    0.06
  -6  10   8    1.02    0.08
   6 -10   8    0.93    0.07
   6  10  -8    0.95    0.07
  -6 -10  -8    1.08    0.07
  -6 -10  -8    1.01    0.07
  -6 -10   8    0.92    0.08
   0  11  -8    3.71    0.26
   0  11  -8    3.74    0.27
   0  11  -8    3.68    0.26
   0  11   8    3.84    0.27
   0  11   8    4.14    0.27
   0  11  -8    3.55    0.27
   0 -11  -8    4.12    0.26
   1  11  -8    0.56    0.06
   1  11  -8    0.61    0.05
  -1 -11  -8    0.70    0.05
   1  11  -8    0.58    0.06
  -1  11   8    0.58    0.07
  -1  11   8    0.65    0.07
   1  11  -8    0.56    0.07
  -1  11  -8    0.65    0.05
   1  11   8    0.63    0.06
  -1  11  -8    0.55    0.06
   1 -11  -8    0.61    0.05
  -1  11  -8    0.58    0.06
  -1  11  -8    0.58    0.06
  -2  11   8    3.27    0.22
   2  11  -8    3.02    0.22
  -2  11   8    3.30    0.22
  -2 -11  -8    3.43    0.22
   2  11  -8    3.09    0.23
   2  11  -8    3.12    0.22
  -2  11  -8    3.08    0.22
   2 -11  -8    3.06    0.22
  -2  11  -8    3.05    0.22
   2  11   8    2.99    0.22
  -2  11  -8    3.14    0.22
  -2  11  -8    3.08    0.22
  -3  11   8    1.48    0.11
   3  11  -8    1.39    0.10
   3 -11   8    1.26    0.11
  -3 -11  -8    1.54    0.11
   3  11  -8    1.38    0.12
  -3  11  -8    1.43    0.10
   3  11   8    1.24    0.10
  -3  11  -8    1.27    0.11
  -3  11  -8    1.44    0.10
  -3  11  -8    1.31    0.16
  -3  11  -8    1.40    0.11
   4  11  -8    0.82    0.08
  -4 -11  -8    0.88    0.06
  -4  11   8    0.91    0.07
   4 -11   8    0.69    0.07
  -4  11   8    0.85    0.07
   4  11  -8    0.76    0.07
  -4  11  -8    0.75    0.07
  -4  11  -8    0.79    0.07
   4 -11  -8    0.83    0.08
  -4  11  -8    0.86    0.08
  -4  11  -8    0.77    0.12
  -4  11  -8    0.78    0.06
   5  11  -8    0.66    0.05
   5  11  -8    0.62    0.07
  -5 -11  -8    0.71    0.05
   5 -11   8    0.65    0.06
  -5  11   8    0.74    0.06
  -5 -11  -8    0.74    0.05
  -5  11   8    0.67    0.06
  -5  11  -8    0.63    0.06
  -5  11  -8    0.62    0.09
   5 -11  -8    0.58    0.07
  -5  11  -8    0.67    0.05
  -6 -11  -8    0.08    0.01
   6  11  -8    0.06    0.02
   6 -11  -8    0.09    0.02
   0  12  -8    0.35    0.04
   0  12  -8    0.40    0.04
   0 -12  -8    0.37    0.04
   0  12  -8    0.34    0.04
   0  12   8    0.50    0.07
   0  12   8    0.28    0.04
   0  12  -8    0.33    0.05
   1  12  -8    3.56    0.25
   1  12  -8    3.51    0.25
  -1  12   8    3.99    0.25
   1  12  -8    3.50    0.26
  -1  12   8    3.61    0.25
   1  12  -8    3.48    0.25
  -1  12   8    3.79    0.26
  -1 -12  -8    3.84    0.25
   1  12   8    3.57    0.25
   1 -12  -8    3.58    0.25
  -1  12  -8    3.60    0.25
  -1  12  -8    3.55    0.25
  -1  12  -8    3.52    0.25
  -1  12  -8    3.37    0.25
   2  12  -8    4.35    0.29
   2  12  -8    4.23    0.29
   2  12  -8    4.22    0.30
  -2  12   8    4.30    0.29
  -2  12   8    4.26    0.30
  -2  12   8    4.47    0.30
  -2  12  -8    4.28    0.29
  -2  12  -8    4.37    0.30
   2 -12  -8    4.11    0.29
  -2  12  -8    4.12    0.29
   2  12   8    4.11    0.29
  -2  12  -8    4.07    0.29
  -3  12   8    0.81    0.07
  -3  12   8    0.83    0.07
   3  12  -8    0.72    0.08
   3  12  -8    0.75    0.06
  -3 -12  -8    0.82    0.06
   3  12  -8    0.78    0.07
  -3  12   8    0.76    0.07
   3  12   8    0.77    0.07
  -3  12  -8    0.74    0.07
  -3  12  -8    0.70    0.07
  -3  12  -8    0.79    0.06
  -3  12  -8    0.76    0.06
  -4 -12  -8    2.39    0.16
  -4 -12  -8    2.64    0.16
  -4  12   8    2.35    0.16
   4 -12   8    2.13    0.16
   4  12  -8    2.13    0.16
   4  12  -8    2.16    0.17
  -4  12   8    2.38    0.16
  -4  12  -8    2.30    0.16
  -4  12  -8    2.28    0.16
   4 -12  -8    2.25    0.17
  -4  12  -8    2.10    0.16
  -4  12  -8    2.27    0.16
  -5  12   8    0.01    0.03
   5 -12   8   -0.01    0.02
  -5 -12  -8    0.00    0.01
   5  12  -8   -0.01    0.01
  -5  12   8   -0.02    0.02
   5  12  -8   -0.04    0.03
  -5  12  -8    0.02    0.02
   5 -12  -8   -0.01    0.02
   0  13  -8    0.82    0.08
   0  13   8    0.83    0.08
   0  13   8    1.00    0.09
   0 -13  -8    0.91    0.07
   0  13  -8    0.92    0.07
  -1 -13  -8    2.21    0.15
   1  13  -8    2.04    0.15
  -1  13   8    2.20    0.15
  -1  13   8    2.39    0.16
   1  13  -8    1.76    0.15
   1  13  -8    2.03    0.18
  -1  13  -8    1.89    0.15
  -1  13  -8    2.48    0.16
   1  13   8    2.19    0.16
   1 -13  -8    2.02    0.15
   2  13  -8    1.45    0.11
  -2  13   8    1.53    0.11
  -2  13   8    1.53    0.12
   2  13  -8    1.40    0.12
  -2 -13  -8    1.64    0.11
   2  13  -8    1.45    0.11
  -2  13   8    1.65    0.11
  -2  13  -8    1.39    0.11
  -2  13  -8    1.49    0.11
  -2  13  -8    1.60    0.11
   2  13   8    1.54    0.11
  -2  13  -8    1.50    0.12
   3  13  -8    0.58    0.07
  -3  13   8    0.78    0.06
   3  13  -8    0.71    0.07
   3  13  -8    0.68    0.06
  -3 -13  -8    0.69    0.05
  -3  13   8    0.70    0.06
  -3  13   8    0.71    0.07
  -3  13  -8    0.65    0.06
   3  13   8    0.69    0.07
  -3  13  -8    0.69    0.06
  -3  13  -8    0.70    0.06
  -3  13  -8    0.61    0.05
  -4  13   8    3.71    0.24
  -4  13   8    3.65    0.23
   4  13  -8    3.32    0.23
  -4 -13  -8    3.46    0.23
   4  13  -8    3.17    0.24
  -4  13  -8    3.54    0.23
  -4  13  -8    3.32    0.24
  -4  13  -8    2.97    0.23
   4 -13  -8    3.53    0.24
  -5  13   8    0.41    0.05
   5  13  -8    0.42    0.04
   5 -13   8    0.43    0.04
  -5  13  -8    0.53    0.07
   5 -13  -8    0.42    0.05
   0  14   8    1.57    0.12
   0  14  -8    1.57    0.11
   0  14   8    1.75    0.13
   0  14  -8    1.57    0.11
   0  14  -8    1.47    0.11
   0  14  -8    1.51    0.12
   0 -14  -8    1.62    0.11
  -1 -14  -8    0.69    0.06
   1  14  -8    0.68    0.06
  -1  14   8    0.80    0.07
  -1  14   8    0.77    0.06
   1  14  -8    0.71    0.07
   1  14  -8    0.63    0.06
   1  14  -8    0.77    0.06
   1  14   8    0.73    0.06
  -1  14  -8    0.63    0.05
  -1  14  -8    0.65    0.06
  -1  14  -8    0.75    0.06
   1 -14  -8    0.68    0.06
  -1  14  -8    0.70    0.06
  -2  14   8    3.83    0.25
  -2  14   8    3.86    0.25
   2  14  -8    3.58    0.25
  -2  14   8    3.93    0.25
  -2 -14  -8    3.78    0.25
   2  14  -8    3.53    0.25
   2  14  -8    3.36    0.26
  -2  14  -8    3.51    0.25
  -2  14  -8    3.67    0.25
   2  14   8    3.72    0.25
  -2  14  -8    3.57    0.25
  -2  14  -8    3.71    0.25
   3  14  -8    1.57    0.13
  -3  14   8    1.89    0.13
  -3  14   8    1.96    0.12
  -3 -14  -8    1.65    0.12
   3  14  -8    1.66    0.12
  -3  14   8    1.90    0.13
  -3  14  -8    1.53    0.12
  -3  14  -8    1.74    0.12
   3  14   8    1.82    0.14
  -3  14  -8    1.68    0.13
   3 -14  -8    1.76    0.13
  -3  14  -8    1.73    0.12
   4  14  -8    0.75    0.06
  -4  14   8    0.87    0.06
  -4  14   8    0.80    0.06
   4  14  -8    0.71    0.07
  -4  14  -8    0.81    0.06
   4 -14  -8    0.71    0.07
  -4  14  -8    0.75    0.06
   0  15  -8    4.05    0.29
   0  15   8    4.74    0.30
   0  15  -8    4.45    0.29
   0  15  -8    4.40    0.29
   0  15  -8    4.11    0.30
   0 -15  -8    4.09    0.29
  -1 -15  -8    0.71    0.08
  -1  15   8    1.01    0.07
  -1  15   8    0.96    0.07
   1  15  -8    0.83    0.06
   1  15  -8    0.77    0.06
   1  15  -8    0.78    0.07
   1  15  -8    0.67    0.08
  -1  15  -8    0.87    0.06
  -1  15  -8    0.73    0.06
  -1  15  -8    0.91    0.06
  -1  15  -8    0.77    0.07
   1  15   8    0.88    0.07
   2  15  -8    0.27    0.04
  -2 -15  -8    0.24    0.03
   2  15  -8    0.21    0.03
   2  15  -8    0.21    0.04
  -2  15   8    0.31    0.04
  -2  15   8    0.28    0.04
  -2  15  -8    0.24    0.03
   2  15   8    0.33    0.04
  -2  15  -8    0.25    0.03
  -2  15  -8    0.23    0.03
  -2  15  -8    0.22    0.03
   3  15  -8    0.44    0.05
   3  15  -8    0.53    0.04
  -3  15  -8    0.51    0.05
   3 -15  -8    0.50    0.06
  -3  15  -8    0.56    0.05
   0  16  -8    2.86    0.19
   0  16  -8    2.45    0.19
   0  16   8    3.14    0.19
   0  16  -8    2.81    0.19
   0  16  -8    2.67    0.19
   1  16  -8    5.98    0.41
  -1 -16  -8    5.61    0.40
   1  16  -8    5.32    0.40
   1  16  -8    5.31    0.40
  -1  16   8    6.43    0.40
  -1  16   8    6.57    0.40
   1  16   8    6.26    0.40
  -1  16  -8    5.58    0.40
  -1  16  -8    6.18    0.40
  -1  16  -8    6.08    0.40
  -2  16   8    1.40    0.09
  -2  16   8    1.43    0.09
   2  16  -8    1.11    0.10
   2  16  -8    1.09    0.09
  -2  16  -8    1.31    0.09
  -2  16  -8    1.31    0.09
  -2  16  -8    1.19    0.09
   2 -16  -8    1.31    0.10
   0  17  -8    2.70    0.18
   0  17   8    3.00    0.18
   0  17  -8    2.41    0.19
  -1  17   8    3.45    0.22
  -1  17  -8    2.88    0.22
  -1  17  -8    3.25    0.22
   0   0  -9    0.01    0.02
   0   0  -9   -0.03    0.02
   0   0   9   -0.04    0.02
   0   0  -9   -0.36    1.42
  -1   0  -9    2.93    0.20
   1   0   9    2.72    0.20
   1   0  -9    2.99    0.21
   1   0   9    2.88    0.21
  -1   0   9    2.94    0.20
   1   0  -9    2.91    0.21
   1   0  -9    3.07    0.21
  -1   0  -9    3.34    0.21
   2   0   9    1.76    0.13
  -2   0   9    1.85    0.13
   2   0  -9    1.79    0.14
   2   0  -9    1.53    0.15
   2   0  -9    1.70    0.14
  -2   0  -9    2.07    0.13
  -2   0  -9    2.16    0.26
  -2   0  -9    1.94    0.13
   2   0   9    1.85    0.13
  -3   0   9    1.88    0.13
   3   0  -9    1.63    0.13
  -3   0  -9    1.99    0.12
   3   0  -9    1.70    0.14
  -3   0   9    1.88    0.13
   3   0   9    1.73    0.13
   3   0  -9    1.65    0.14
   3   0   9    1.80    0.13
   4   0   9    0.52    0.05
  -4   0   9    0.51    0.07
   4   0  -9    0.56    0.07
  -4   0   9    0.56    0.05
   4   0  -9    0.59    0.07
   4   0  -9    0.57    0.06
  -4   0  -9    0.57    0.04
   4   0  -9    0.56    0.09
  -5   0   9    0.28    0.04
   5   0   9    0.27    0.04
   5   0  -9    0.30    0.07
   5   0   9    0.41    0.07
  -5   0   9    0.37    0.05
   5   0  -9    0.21    0.04
  -5   0  -9    0.30    0.03
  -6   0  -9    0.95    0.07
   6   0  -9    0.90    0.09
  -6   0   9    0.91    0.07
   6   0   9    1.05    0.08
  -6   0   9    0.78    0.18
   6   0  -9    0.90    0.09
  -6   0  -9    1.04    0.07
  -7   0  -9    2.82    0.19
  -7   0   9    2.53    0.26
   7   0  -9    2.65    0.19
   7   0   9    3.13    0.19
   0  -1  -9    8.12    0.58
   0   1   9    7.64    0.58
   0  -1  -9    9.02    0.58
   0   1   9    8.57    0.58
   0   1  -9    9.11    0.58
   0   1  -9    8.20    0.58
   0   1  -9   10.05    0.58
   0  -1   9    7.93    0.58
  -1  -1  -9    5.38    0.35
   1  -1   9    4.73    0.35
  -1   1   9    4.91    0.35
  -1  -1  -9    6.00    0.36
   1   1  -9    5.69    0.36
   1   1  -9    5.10    0.36
   1   1  -9    5.03    0.36
   1  -1  -9    5.40    0.36
  -1  -1   9    5.04    0.35
   1  -1  -9    4.68    0.35
  -1   1  -9    5.83    0.36
   1  -1  -9    5.46    0.36
  -1   1  -9    5.12    0.35
   1   1   9    5.30    0.36
   1   1   9    4.86    0.35
   2   1  -9    5.30    0.37
   2   1  -9    4.97    0.37
   2   1  -9    5.46    0.37
  -2   1   9    4.87    0.38
  -2  -1  -9    5.92    0.36
   2   1  -9    5.27    0.37
  -2   1   9    5.38    0.36
   2  -1   9    5.13    0.36
   2  -1   9    5.15    0.36
  -2  -1  -9    6.09    0.47
   2  -1  -9    4.65    0.38
   2   1   9    5.21    0.36
   2   1   9    5.57    0.36
  -2   1  -9    4.92    0.43
   2  -1  -9    5.27    0.37
  -2  -1   9    5.80    0.36
  -2   1  -9    5.73    0.36
   2  -1  -9    5.36    0.37
  -3  -1  -9    7.51    0.48
  -3   1   9    7.22    0.49
   3   1  -9    7.03    0.49
   3  -1   9    6.80    0.49
   3  -1   9    6.98    0.49
  -3   1   9    7.48    0.49
   3   1  -9    6.98    0.50
   3   1  -9    6.87    0.49
   3   1   9    7.14    0.49
  -3  -1   9    7.80    0.49
   3  -1  -9    6.96    0.50
   3  -1  -9    6.61    0.49
  -3  -1   9    7.59    0.49
   3   1   9    6.97    0.49
  -3   1  -9    7.78    0.48
   3  -1  -9    6.84    0.50
   3  -1  -9    6.72    0.50
  -3   1  -9    8.22    0.49
  -3   1  -9    7.46    0.58
   4  -1   9    2.16    0.16
  -4   1   9    2.27    0.15
   4   1  -9    2.15    0.16
   4  -1   9    2.16    0.15
  -4  -1  -9    2.26    0.15
  -4   1   9    2.31    0.16
   4   1  -9    2.04    0.17
   4   1  -9    1.86    0.16
   4  -1  -9    2.06    0.16
  -4  -1   9    2.26    0.16
   4   1   9    2.25    0.16
  -4   1  -9    2.26    0.15
   4  -1  -9    1.95    0.16
   4  -1  -9    2.12    0.17
  -5  -1  -9    1.14    0.08
   5   1  -9    1.10    0.10
  -5   1   9    1.08    0.10
  -5   1   9    0.94    0.20
  -5   1   9    1.08    0.09
  -5  -1   9    1.07    0.11
  -5  -1   9    1.18    0.09
   5  -1  -9    0.97    0.10
  -5   1  -9    1.18    0.08
  -5   1  -9    1.20    0.08
   5   1   9    1.14    0.09
   5  -1  -9    1.03    0.11
  -6   1   9    1.47    0.13
  -6  -1  -9    1.50    0.10
   6   1  -9    1.42    0.12
   6  -1   9    1.63    0.11
  -6   1   9    1.31    0.21
  -6  -1  -9    1.53    0.11
  -6   1   9    1.48    0.11
  -6  -1   9    1.30    0.22
   6  -1  -9    1.35    0.12
  -6  -1   9    1.51    0.11
   6   1   9    1.65    0.11
   6  -1  -9    1.25    0.12
  -6   1  -9    1.62    0.11
   7   1  -9    0.71    0.06
   7  -1   9    0.77    0.06
  -7   1   9    0.70    0.13
  -7  -1  -9    0.72    0.06
   7   1   9    0.80    0.06
  -7  -1   9    0.69    0.06
   7  -1  -9    0.67    0.07
  -7  -1   9    0.69    0.14
   7  -1  -9    0.66    0.06
   0   2   9   11.29    0.84
   0   2  -9   11.60    0.84
   0   2  -9   11.68    0.84
   0   2   9   12.41    0.84
   0   2  -9   14.99    0.84
   0  -2   9   11.68    0.84
   0   2  -9   12.82    0.84
   0  -2  -9   13.67    0.84
   0  -2  -9   12.34    0.84
  -1   2   9    5.73    0.43
  -1   2   9    6.64    0.44
   1   2  -9    6.81    0.43
  -1  -2  -9    6.54    0.43
   1   2  -9    6.20    0.43
   1   2  -9    6.14    0.43
  -1  -2  -9    7.18    0.43
   1  -2   9    5.53    0.43
  -1   2  -9    6.64    0.43
  -1   2  -9    5.96    0.43
   1   2   9    6.96    0.43
   1   2   9    6.39    0.43
   1  -2  -9    6.79    0.43
  -1  -2   9    6.33    0.43
   1   2   9    5.58    0.43
   1  -2  -9    6.40    0.44
   1  -2  -9    5.90    0.43
  -2   2   9   12.07    0.79
  -2   2   9   11.60    0.80
   2   2  -9   12.49    0.80
   2   2  -9   11.52    0.80
  -2  -2  -9   12.89    0.79
   2   2  -9   12.15    0.80
  -2   2   9   11.33    0.80
   2  -2   9   11.04    0.79
   2  -2   9   10.95    0.79
   2   2  -9   12.30    0.80
   2   2  -9   11.12    0.80
   2  -2  -9   11.07    0.79
   2   2   9   12.82    0.79
   2   2   9   10.66    0.79
  -2  -2   9   12.77    0.79
  -2   2  -9   11.41    0.79
   2  -2  -9   12.89    0.82
   2  -2  -9   12.05    0.80
  -2   2  -9   11.87    0.79
   2  -2  -9   11.27    0.80
  -2   2  -9   11.54    0.84
   3  -2   9    0.81    0.08
   3   2  -9    0.97    0.08
   3   2  -9    0.76    0.08
   3  -2   9    0.85    0.07
   3   2  -9    0.95    0.08
   3   2  -9    0.84    0.09
  -3   2   9    0.86    0.08
  -3   2   9    0.79    0.07
   3  -2  -9    0.84    0.09
   3  -2  -9    0.76    0.08
  -3  -2   9    0.91    0.07
  -3   2  -9    0.94    0.06
  -3   2  -9    0.87    0.16
  -3  -2   9    0.94    0.08
  -3   2  -9    1.05    0.07
   3   2   9    0.79    0.09
   4   2  -9    0.23    0.05
   4   2  -9    0.17    0.04
   4  -2   9    0.26    0.03
   4   2  -9    0.32    0.04
  -4   2   9    0.32    0.04
  -4   2   9    0.24    0.04
  -4  -2  -9    0.28    0.03
   4   2  -9    0.19    0.04
   4  -2   9    0.19    0.03
   4  -2  -9    0.22    0.05
   4  -2  -9    0.24    0.04
  -4   2  -9    0.27    0.03
   4   2   9    0.24    0.04
  -4   2  -9    0.29    0.13
   4  -2  -9    0.26    0.04
  -4  -2   9    0.19    0.03
  -4   2  -9    0.24    0.03
  -4  -2   9    0.23    0.04
  -5   2   9    0.60    0.06
  -5   2   9    0.50    0.17
   5  -2   9    0.94    0.13
  -5   2   9    0.64    0.08
   5   2  -9    0.74    0.07
  -5  -2  -9    0.65    0.05
   5   2  -9    0.78    0.07
   5   2  -9    0.64    0.08
   5  -2   9    0.68    0.06
  -5   2  -9    0.69    0.06
   5   2   9    0.69    0.06
  -5   2  -9    0.62    0.16
  -5  -2   9    0.67    0.06
   5  -2  -9    0.62    0.08
   5  -2  -9    0.66    0.08
  -5  -2   9    0.69    0.10
  -6   2   9    0.07    0.02
   6  -2   9    0.13    0.03
  -6  -2  -9    0.09    0.01
   6  -2   9    0.07    0.02
  -6   2   9    0.16    0.05
   6   2  -9    0.06    0.03
  -6   2   9    0.06    0.09
  -6  -2   9    0.11    0.02
   6  -2  -9    0.05    0.03
   6   2   9    0.15    0.03
  -6  -2   9    0.08    0.10
   6  -2  -9    0.08    0.03
  -6   2  -9    0.08    0.02
   6   2   9    0.07    0.02
   6   2   9    0.12    0.04
   7   2  -9    1.30    0.10
  -7   2   9    1.23    0.16
  -7  -2  -9    1.36    0.10
   7  -2   9    1.36    0.09
   7  -2  -9    1.21    0.10
   7  -2  -9    1.27    0.10
  -7  -2   9    1.38    0.09
  -7  -2   9    1.13    0.17
   7   2   9    1.42    0.10
   0   3  -9   36.62    2.62
   0   3   9   45.12    2.62
   0   3  -9   44.75    2.62
   0   3  -9   37.33    2.62
   0  -3  -9   38.98    2.61
   0   3  -9   36.15    2.62
   0  -3   9   35.67    2.61
   0   3   9   42.41    2.62
   0   3   9   34.08    2.61
   0   3   9   34.12    2.62
   0  -3  -9   44.71    2.62
  -1  -3  -9    9.87    0.63
  -1   3   9    8.55    0.63
  -1  -3  -9   10.68    0.64
  -1   3   9    8.59    0.64
   1   3  -9   10.28    0.64
   1   3  -9    9.16    0.64
  -1   3   9    9.71    0.64
   1   3  -9    8.29    0.64
   1   3  -9   10.00    0.64
   1   3  -9    9.12    0.64
   1  -3  -9    9.32    0.63
   1  -3  -9    8.83    0.64
   1   3   9    9.09    0.64
  -1   3  -9    9.63    0.64
  -1  -3   9    9.55    0.64
   1  -3  -9   10.73    0.64
   1   3   9   10.30    0.64
  -1   3  -9    8.83    0.64
  -1   3  -9    8.86    0.64
   2  -3   9    7.02    0.53
   2   3  -9    7.75    0.54
  -2  -3  -9    8.52    0.53
  -2   3   9    7.70    0.53
   2   3  -9    7.67    0.54
   2   3  -9    8.46    0.54
  -2   3   9    7.85    0.54
  -2   3   9    7.63    0.54
   2   3  -9    8.16    0.54
   2   3  -9    7.37    0.54
   2  -3  -9    7.45    0.54
  -2   3  -9    7.41    0.54
  -2   3  -9    7.97    0.54
   2  -3  -9    7.55    0.53
  -2  -3   9    8.50    0.54
  -2   3  -9    8.71    0.53
   2   3   9    8.67    0.54
  -2   3  -9    7.91    0.59
   2  -3  -9    7.85    0.54
   3   3  -9    2.92    0.22
   3   3  -9    3.10    0.22
  -3  -3  -9    3.24    0.21
   3  -3   9    2.84    0.23
   3   3  -9    3.41    0.22
  -3   3   9    3.14    0.22
   3   3  -9    2.62    0.24
   3   3   9    3.37    0.22
  -3   3  -9    3.35    0.28
   3  -3  -9    2.97    0.23
   3  -3  -9    3.29    0.23
  -3  -3   9    3.23    0.22
  -3   3  -9    3.48    0.22
  -4   3   9    1.82    0.13
   4   3  -9    1.96    0.14
   4   3  -9    1.70    0.14
   4   3  -9    1.77    0.15
  -4   3   9    1.82    0.14
  -4  -3  -9    1.92    0.13
   4   3  -9    1.74    0.14
   4  -3   9    1.80    0.13
   4  -3   9    1.60    0.13
   4  -3  -9    1.72    0.15
  -4  -3   9    1.90    0.13
  -4  -3   9    1.81    0.14
   4  -3  -9    1.77    0.15
  -4   3  -9    2.07    0.13
  -4   3  -9    1.91    0.20
   4  -3  -9    1.62    0.14
  -5   3   9   14.99    1.24
  -5   3   9   16.93    1.15
   5  -3   9   18.03    1.15
  -5   3   9   17.55    1.16
   5   3  -9   16.83    1.16
  -5  -3  -9   17.52    1.15
   5  -3   9   17.27    1.16
   5   3  -9   16.77    1.17
   5   3  -9   17.40    1.15
  -5   3  -9   18.38    1.15
   5   3   9   18.10    1.15
  -5  -3   9   17.42    1.15
  -5   3  -9   17.49    1.20
   5  -3  -9   16.51    1.16
   5  -3  -9   16.19    1.16
   6   3  -9    2.53    0.18
  -6  -3  -9    2.54    0.17
   6   3  -9    2.47    0.18
  -6   3   9    2.30    0.26
  -6   3   9    2.58    0.18
   6  -3   9    2.60    0.18
   6  -3  -9    2.26    0.18
  -6  -3   9    2.22    0.28
  -6  -3   9    2.59    0.18
   6  -3  -9    2.44    0.19
   6   3   9    2.83    0.18
   7  -3   9    2.15    0.14
  -7   3   9    1.93    0.20
  -7  -3  -9    2.24    0.14
   7   3   9    2.20    0.14
   7  -3  -9    2.00    0.15
  -7  -3   9    2.09    0.14
  -7  -3   9    1.75    0.21
   7  -3  -9    1.97    0.15
   0   4  -9   19.04    1.35
   0   4  -9   18.28    1.35
   0   4   9   21.40    1.35
   0  -4  -9   21.19    1.35
   0  -4  -9   23.49    1.35
   0   4  -9   19.45    1.35
   0   4   9   23.46    1.35
   0   4  -9   19.06    1.35
   0  -4   9   18.14    1.35
   0   4   9   17.71    1.35
   1   4  -9    7.53    0.47
  -1   4   9    7.27    0.47
  -1  -4  -9    7.50    0.47
  -1  -4  -9    7.97    0.47
   1   4  -9    6.63    0.47
  -1   4   9    6.01    0.47
   1   4  -9    6.30    0.48
   1   4  -9    7.41    0.47
   1   4  -9    6.69    0.47
   1   4  -9    6.49    0.47
  -1   4   9    6.45    0.47
   1   4   9    7.69    0.47
  -1  -4   9    6.91    0.47
  -1   4  -9    6.91    0.47
   1  -4  -9    7.74    0.47
  -1   4  -9    6.49    0.47
   1  -4  -9    6.59    0.48
  -1   4  -9    6.45    0.47
  -1   4  -9    6.68    0.47
   2   4  -9    5.90    0.41
   2   4  -9    6.53    0.41
  -2  -4  -9    6.69    0.41
   2  -4   9    5.38    0.41
  -2   4   9    5.88    0.42
   2   4  -9    6.00    0.41
   2   4  -9    5.85    0.42
  -2   4   9    5.75    0.41
  -2   4   9    5.66    0.41
   2   4  -9    6.12    0.42
   2  -4  -9    5.81    0.42
  -2   4  -9    5.87    0.41
   2  -4  -9    5.86    0.41
  -2   4  -9    6.12    0.42
  -2   4  -9    6.34    0.47
  -2   4  -9    5.88    0.42
   2   4   9    6.69    0.41
  -2   4  -9    6.59    0.41
  -2  -4   9    6.54    0.41
   2  -4  -9    5.84    0.42
  -3   4   9    4.23    0.30
   3   4  -9    4.24    0.30
   3   4  -9    3.95    0.30
   3  -4   9    3.69    0.29
   3   4  -9    4.40    0.30
  -3  -4  -9    4.41    0.29
   3   4  -9    4.46    0.30
   3   4  -9    3.95    0.30
  -3   4  -9    4.34    0.30
   3  -4  -9    3.87    0.33
  -3   4  -9    4.65    0.29
   3   4   9    4.57    0.29
  -3   4  -9    4.38    0.29
  -3   4  -9    4.56    0.35
   4  -4   9   37.48    2.68
   4   4  -9   37.57    2.68
  -4  -4  -9   40.48    2.68
   4   4  -9   38.09    2.69
  -4   4   9   40.78    2.68
   4   4  -9   41.86    2.68
  -4   4   9   34.47    2.76
   4   4  -9   39.20    2.68
  -4   4   9   39.16    2.68
   4   4   9   42.01    2.68
  -4   4  -9   43.62    2.74
  -4   4  -9   43.38    2.68
  -4  -4   9   42.64    2.68
   4  -4  -9   38.65    2.69
   4  -4  -9   39.68    2.69
  -4  -4   9   41.43    2.68
  -5   4   9    7.14    0.47
   5   4  -9    6.55    0.47
   5  -4   9    6.72    0.47
  -5  -4  -9    7.07    0.46
   5  -4   9    7.01    0.46
  -5   4   9    6.05    0.55
   5   4  -9    6.97    0.47
  -5  -4   9    6.85    0.47
   5   4   9    7.14    0.47
  -5   4  -9    7.13    0.52
   5  -4  -9    6.68    0.47
   5  -4  -9    6.71    0.48
   6   4  -9    1.77    0.13
  -6  -4  -9    1.98    0.13
   6   4  -9    1.99    0.13
  -6   4   9    1.92    0.14
  -6   4   9    1.75    0.22
   6  -4   9    1.89    0.13
   6  -4  -9    1.84    0.14
  -6  -4   9    1.76    0.13
   6  -4  -9    1.83    0.14
  -6   4  -9    1.85    0.20
   6   4   9    1.96    0.13
  -6  -4   9    1.58    0.23
   7  -4   9    0.34    0.04
  -7  -4  -9    0.32    0.03
  -7   4   9    0.36    0.11
   7   4   9    0.42    0.04
   7  -4  -9    0.31    0.05
  -7  -4   9    0.28    0.12
  -7  -4   9    0.38    0.03
   0   5   9    0.39    0.05
   0   5  -9    0.29    0.05
   0   5   9    0.33    0.04
   0   5  -9    0.30    0.04
   0  -5  -9    0.40    0.05
   0   5  -9    0.31    0.04
   0  -5  -9    0.36    0.03
   0   5  -9    0.37    0.04
   0   5  -9    0.25    0.04
   0   5   9    0.37    0.05
   0   5  -9    0.39    0.04
   1   5  -9    1.27    0.11
  -1  -5  -9    1.69    0.11
   1   5  -9    1.37    0.11
  -1   5   9    1.38    0.11
   1   5  -9    1.42    0.11
   1   5  -9    1.38    0.11
   1   5  -9    1.61    0.11
  -1   5   9    1.35    0.11
  -1  -5  -9    1.59    0.10
   1   5  -9    1.51    0.11
  -1   5  -9    1.35    0.11
   1  -5  -9    1.59    0.12
  -1  -5   9    1.40    0.11
   1   5   9    1.61    0.11
  -1   5  -9    1.39    0.11
  -1   5  -9    1.36    0.11
  -1   5  -9    1.38    0.11
  -2  -5  -9    0.34    0.03
  -2   5   9    0.38    0.05
   2   5  -9    0.46    0.05
   2   5  -9    0.34    0.05
   2   5  -9    0.41    0.04
   2  -5   9    0.26    0.05
   2   5  -9    0.34    0.05
   2   5  -9    0.31    0.06
  -2   5   9    0.42    0.06
  -2  -5   9    0.45    0.05
   2  -5  -9    0.34    0.04
   2   5   9    0.34    0.05
  -2   5  -9    0.33    0.04
  -2   5  -9    0.40    0.05
  -2   5  -9    0.36    0.10
  -2   5  -9    0.29    0.04
  -2   5  -9    0.40    0.05
   2  -5  -9    0.25    0.06
   3   5  -9    0.95    0.08
   3  -5   9    0.87    0.08
   3   5  -9    1.01    0.08
  -3  -5  -9    1.04    0.07
  -3   5   9    0.81    0.21
  -3   5   9    0.94    0.08
   3   5  -9    1.00    0.08
   3   5  -9    0.92    0.09
  -3   5  -9    1.04    0.14
   3  -5  -9    0.96    0.11
   3   5   9    0.98    0.08
  -3   5  -9    0.97    0.08
  -3   5  -9    1.00    0.09
  -3  -5   9    1.01    0.09
   4   5  -9   12.68    0.89
  -4   5   9   13.14    0.89
   4   5  -9   12.85    0.89
   4   5  -9   12.69    0.90
   4   5  -9   13.67    0.89
  -4   5   9   11.58    0.97
   4  -5   9   12.05    0.89
  -4  -5  -9   13.56    0.88
  -4   5  -9   14.68    0.95
   4  -5  -9   13.64    0.90
  -4  -5   9   13.16    0.89
  -4   5  -9   13.50    0.89
   4   5   9   14.07    0.89
  -4  -5   9   14.04    0.89
   4  -5  -9   12.58    0.90
  -5  -5  -9    9.72    0.64
   5   5  -9    9.09    0.65
   5   5  -9    9.25    0.64
   5  -5   9    9.34    0.64
  -5   5   9    8.27    0.72
  -5   5   9    9.75    0.64
   5  -5   9    9.72    0.64
   5   5  -9    9.78    0.64
  -5  -5   9    9.51    0.64
   5  -5  -9    9.33    0.65
  -5   5  -9   10.00    0.69
   5  -5  -9    9.19    0.65
   5   5   9    9.94    0.64
  -6  -5  -9    0.11    0.02
  -6   5   9    0.09    0.08
   6  -5   9    0.07    0.02
   6   5  -9    0.13    0.02
   6   5  -9    0.13    0.02
  -6   5   9    0.14    0.04
   6   5   9    0.09    0.02
   6  -5  -9    0.09    0.03
  -6  -5   9    0.10    0.09
  -6   5  -9    0.14    0.08
   6   5   9    0.20    0.03
   6  -5  -9    0.11    0.04
  -6  -5   9    0.14    0.02
  -7  -5  -9    0.48    0.04
  -7  -5  -9    0.52    0.04
  -7   5   9    0.46    0.11
   7  -5   9    0.54    0.05
  -7  -5   9    0.52    0.14
   7   5   9    0.41    0.05
   7  -5  -9    0.47    0.05
   7  -5  -9    0.50    0.06
  -7  -5   9    0.60    0.05
   0   6   9    3.85    0.31
   0  -6  -9    4.70    0.31
   0   6  -9    5.09    0.31
   0   6  -9    4.21    0.31
   0   6  -9    3.84    0.31
   0   6  -9    5.08    0.31
   0   6   9    4.65    0.31
   0   6   9    4.51    0.31
   0  -6  -9    5.13    0.31
   0   6  -9    4.27    0.31
   0   6  -9    4.19    0.31
  -1   6   9    3.34    0.24
   1   6  -9    3.36    0.24
  -1  -6  -9    3.85    0.23
   1   6  -9    3.62    0.23
  -1   6   9    3.30    0.24
   1   6  -9    3.10    0.23
   1   6  -9    3.26    0.24
   1   6  -9    3.07    0.24
   1   6  -9    3.52    0.23
  -1  -6   9    3.42    0.24
   1   6   9    3.73    0.24
  -1   6  -9    3.41    0.24
  -1   6  -9    3.34    0.23
  -1   6  -9    3.28    0.24
  -1   6  -9    3.18    0.23
   2   6  -9    0.69    0.06
  -2   6   9    0.59    0.07
   2   6  -9    0.71    0.07
   2   6  -9    0.61    0.06
   2   6  -9    0.75    0.06
  -2  -6  -9    0.69    0.06
   2  -6   9    0.57    0.07
  -2   6   9    0.67    0.07
  -2   6  -9    0.73    0.07
   2   6   9    0.71    0.06
  -2  -6   9    0.83    0.08
  -2   6  -9    0.71    0.12
  -2   6  -9    0.69    0.07
   2  -6  -9    0.75    0.06
  -2   6  -9    0.59    0.07
  -2   6  -9    0.75    0.06
   3  -6   9    0.37    0.05
   3   6  -9    0.41    0.05
  -3   6   9    0.36    0.15
  -3   6   9    0.41    0.08
  -3   6   9    0.41    0.05
   3   6  -9    0.30    0.06
  -3  -6  -9    0.35    0.03
   3   6  -9    0.39    0.05
   3   6  -9    0.26    0.05
   3   6  -9    0.33    0.05
  -3  -6   9    0.42    0.06
   3   6   9    0.37    0.05
  -3   6  -9    0.35    0.05
  -3   6  -9    0.35    0.05
  -3   6  -9    0.40    0.11
  -3   6  -9    0.30    0.04
   3  -6  -9    0.31    0.06
   4   6  -9    3.11    0.23
   4  -6   9    3.00    0.23
  -4  -6  -9    3.49    0.22
   4   6  -9    3.21    0.23
  -4   6   9    3.41    0.23
  -4   6   9    2.90    0.32
   4   6  -9    3.23    0.24
   4   6  -9    3.01    0.23
   4  -6  -9    3.35    0.25
   4   6   9    3.41    0.23
   4  -6  -9    2.92    0.24
  -4   6  -9    3.64    0.29
  -4  -6   9    3.42    0.23
  -4   6  -9    3.55    0.23
  -4   6  -9    3.41    0.23
  -5   6   9   24.65    1.59
   5   6  -9   22.48    1.57
  -5  -6  -9   24.23    1.57
   5   6  -9   22.54    1.59
   5  -6   9   22.46    1.58
   5   6  -9   24.41    1.59
  -5   6  -9   24.17    1.58
   5  -6  -9   22.80    1.58
   5   6   9   23.88    1.58
   6  -6   9    0.00    0.02
   6   6  -9    0.01    0.02
  -6  -6  -9    0.02    0.01
  -6   6   9    0.01    0.07
  -6   6   9    0.02    0.03
  -6  -6   9    0.02    0.02
  -6  -6   9   -0.01    0.08
   6   6   9    0.05    0.02
   6   6   9    0.01    0.02
   6  -6  -9    0.06    0.03
  -6   6  -9    0.02    0.06
   6  -6  -9    0.00    0.03
  -7   6   9    8.24    0.62
   7  -6   9    9.15    0.59
  -7  -6  -9    8.39    0.59
  -7  -6  -9    9.70    0.59
  -7  -6   9    8.88    0.59
   7  -6  -9    8.17    0.59
   0   7   9    0.61    0.08
   0   7   9    0.73    0.07
   0   7  -9    0.62    0.06
   0  -7  -9    0.73    0.07
   0   7  -9    0.70    0.06
   0   7  -9    0.75    0.06
   0   7  -9    0.55    0.06
   0   7  -9    0.57    0.08
   0   7  -9    0.62    0.08
   1   7  -9   26.53    1.87
   1   7  -9   27.27    1.86
  -1   7   9   26.07    1.86
   1   7  -9   27.88    1.86
   1   7  -9   24.59    1.86
   1   7  -9   28.10    1.86
   1   7  -9   29.64    1.86
   1   7   9   30.97    1.86
   1   7   9   30.34    1.86
  -1   7  -9   27.27    1.86
   1  -7  -9   30.49    1.86
  -1   7  -9   23.80    1.86
  -1   7  -9   27.69    1.86
  -2   7   9   32.33    2.20
  -2   7   9   33.71    2.20
   2   7  -9   33.61    2.20
   2   7  -9   30.99    2.20
   2   7  -9   34.54    2.20
  -2  -7  -9   35.53    2.20
   2   7  -9   31.63    2.21
   2   7  -9   28.95    2.20
  -2   7  -9   32.56    2.26
  -2   7  -9   32.96    2.20
  -2   7  -9   33.37    2.20
   2   7   9   34.43    2.20
   2  -7  -9   32.79    2.20
  -2   7  -9   32.51    2.20
   3   7  -9    5.72    0.43
   3  -7   9    5.71    0.43
   3   7  -9    6.63    0.43
   3   7  -9    5.55    0.43
   3   7  -9    6.53    0.43
  -3   7   9    6.72    0.44
  -3   7   9    6.30    0.43
   3   7  -9    6.13    0.44
  -3  -7  -9    6.58    0.42
  -3   7  -9    6.22    0.43
  -3   7  -9    6.48    0.43
  -3   7  -9    6.09    0.43
   3   7   9    6.65    0.43
  -3  -7   9    6.66    0.43
  -3   7  -9    6.60    0.49
  -4  -7  -9    0.83    0.06
   4   7  -9    0.77    0.09
   4   7  -9    0.70    0.07
   4  -7   9    0.69    0.07
   4   7  -9    0.81    0.08
  -4   7   9    0.63    0.19
  -4   7   9    0.80    0.07
   4   7  -9    0.73    0.07
  -4  -7   9    0.76    0.08
   4   7   9    0.78    0.07
   4  -7  -9    0.74    0.11
  -4   7  -9    0.85    0.07
  -4   7  -9    0.86    0.07
  -4   7  -9    0.80    0.13
  -5  -7  -9    1.29    0.09
   5   7  -9    1.15    0.11
  -5   7   9    1.30    0.10
   5  -7   9    1.16    0.09
  -5   7   9    1.17    0.19
   5   7  -9    1.26    0.10
   5   7   9    1.20    0.09
  -5   7  -9    1.33    0.10
   5  -7  -9    1.14    0.12
  -5   7  -9    1.29    0.15
  -5  -7   9    1.25    0.10
   5  -7  -9    1.22    0.11
  -6   7   9    1.54    0.18
  -6   7   9    1.74    0.12
   6   7  -9    1.59    0.12
   6  -7   9    1.76    0.12
  -6  -7  -9    1.77    0.11
  -6   7   9    1.64    0.12
   6  -7  -9    1.57    0.14
   6  -7  -9    1.61    0.13
  -6  -7   9    1.66    0.12
   6   7   9    1.54    0.12
  -6   7  -9    1.60    0.16
  -6  -7   9    1.39    0.20
  -7  -7  -9    5.75    0.38
   7  -7   9    5.55    0.38
   0   8  -9    5.26    0.39
   0   8  -9    5.67    0.39
   0   8  -9    5.43    0.38
   0  -8  -9    6.11    0.38
   0   8   9    5.37    0.39
   0   8  -9    6.17    0.38
   0   8  -9    5.86    0.38
   0   8   9    5.24    0.38
  -1  -8  -9    1.79    0.11
  -1   8   9    1.35    0.12
   1   8  -9    1.54    0.12
   1   8  -9    1.40    0.11
   1   8  -9    1.59    0.12
   1   8  -9    1.44    0.12
  -1   8   9    1.48    0.12
   1   8  -9    1.69    0.12
   1   8   9    1.64    0.12
  -1   8  -9    1.65    0.12
   1   8   9    1.60    0.12
  -1   8  -9    1.49    0.12
  -1   8  -9    1.54    0.12
  -1   8  -9    1.75    0.11
   1  -8  -9    1.69    0.11
   2   8  -9   30.23    1.92
  -2  -8  -9   31.56    1.91
  -2   8   9   27.89    1.92
   2   8  -9   27.29    1.93
   2   8  -9   28.59    1.92
   2   8  -9   24.36    1.92
  -2   8   9   30.27    1.92
  -2   8  -9   28.04    1.92
   2   8   9   29.80    1.92
  -2   8  -9   28.35    1.92
   2   8   9   28.93    1.92
  -2   8  -9   28.38    1.92
  -2   8  -9   27.96    1.97
   2  -8  -9   28.95    1.92
   3   8  -9    2.17    0.18
   3   8  -9    2.44    0.18
  -3   8   9    2.83    0.19
   3   8  -9    2.35    0.19
  -3   8   9    2.53    0.19
  -3  -8  -9    2.73    0.18
   3  -8   9    2.32    0.18
   3   8  -9    2.62    0.18
  -3   8  -9    2.57    0.18
  -3  -8   9    2.89    0.21
  -3   8  -9    2.64    0.18
   3   8   9    2.49    0.18
  -3   8  -9    2.50    0.18
   3   8   9    2.79    0.18
  -3   8  -9    2.64    0.24
  -4   8   9    2.10    0.15
   4   8  -9    1.97    0.15
   4   8  -9    2.09    0.15
   4   8  -9    1.92    0.16
   4  -8   9    1.82    0.14
  -4  -8  -9    2.07    0.14
  -4   8  -9    1.99    0.20
   4   8   9    2.22    0.14
   4   8   9    1.58    0.18
  -4   8  -9    2.05    0.15
  -4  -8   9    2.02    0.15
   4   8   9    1.96    0.14
  -4   8  -9    2.09    0.15
  -5   8   9   11.98    0.76
   5   8  -9   11.36    0.76
   5  -8   9   11.10    0.76
  -5  -8  -9   12.04    0.76
  -5   8   9   10.55    0.81
   5   8  -9   11.00    0.77
   5   8   9   10.66    0.76
   5  -8  -9   11.05    0.77
  -5   8  -9   11.37    0.76
  -5   8  -9   11.32    0.81
   5   8   9   11.40    0.76
  -5  -8   9   11.33    0.76
  -6  -8  -9    7.41    0.47
  -6   8   9    7.19    0.47
   6  -8   9    6.89    0.47
  -6   8   9    6.56    0.51
   6   8  -9    6.73    0.47
  -6  -8  -9    6.99    0.46
  -6   8   9    7.26    0.47
   6  -8  -9    6.57    0.47
  -6  -8   9    6.75    0.47
   0   9  -9    8.74    0.57
   0   9  -9    8.07    0.58
   0  -9  -9    9.27    0.57
   0   9   9    7.61    0.57
   0   9  -9    8.45    0.57
   0   9  -9    8.60    0.57
   0   9  -9    8.27    0.57
  -1  -9  -9   14.95    0.91
   1   9  -9   12.68    0.92
  -1   9   9   13.24    0.92
   1   9  -9   13.52    0.92
   1   9  -9   13.92    0.92
  -1   9   9   13.25    0.92
   1   9  -9   13.03    0.92
   1   9   9   13.14    0.92
  -1   9  -9   12.91    0.92
  -1   9  -9   13.63    0.92
   1  -9  -9   14.22    0.91
   1   9   9   12.73    0.91
  -1   9  -9   13.49    0.92
  -1   9  -9   15.08    0.91
  -1   9  -9   14.31    0.92
   2   9  -9   10.62    0.73
  -2  -9  -9   11.85    0.72
   2   9  -9   10.88    0.73
  -2   9   9   10.76    0.73
   2   9  -9    9.99    0.73
  -2   9   9   11.20    0.73
  -2   9  -9   10.48    0.73
  -2   9  -9   10.76    0.73
   2   9   9   10.40    0.73
   2   9   9    9.99    0.72
   2  -9  -9   10.92    0.72
  -2   9  -9   11.03    0.73
   3   9  -9    0.31    0.04
  -3  -9  -9    0.37    0.03
  -3   9   9    0.38    0.05
   3   9  -9    0.45    0.05
   3   9  -9    0.36    0.06
  -3   9   9    0.41    0.05
   3  -9   9    0.28    0.05
  -3   9  -9    0.29    0.04
   3   9   9    0.30    0.04
   3   9   9    0.32    0.04
  -3   9  -9    0.37    0.10
  -3   9  -9    0.40    0.04
  -3   9  -9    0.39    0.05
   3   9   9    0.31    0.04
   4   9  -9    0.45    0.06
  -4   9   9    0.31    0.05
  -4  -9  -9    0.45    0.04
   4   9  -9    0.50    0.06
   4  -9   9    0.35    0.05
   4   9  -9    0.33    0.08
   4  -9  -9    0.33    0.08
  -4   9  -9    0.47    0.05
   4   9   9    0.37    0.04
  -4  -9   9    0.45    0.05
   5   9  -9    0.34    0.05
  -5   9   9    0.41    0.05
   5  -9   9    0.35    0.04
  -5  -9  -9    0.37    0.03
   5   9  -9    0.32    0.04
  -5   9  -9    0.26    0.08
   5  -9  -9    0.30    0.05
  -5   9  -9    0.36    0.05
  -5  -9   9    0.35    0.05
   5   9   9    0.25    0.04
  -6   9   9    0.53    0.06
  -6  -9  -9    0.42    0.03
  -6  -9  -9    0.41    0.04
  -6   9   9    0.40    0.05
   6  -9   9    0.41    0.04
   6   9  -9    0.37    0.04
   6  -9  -9    0.36    0.05
  -6   9  -9    0.36    0.03
  -6  -9   9    0.39    0.04
   0  10  -9    0.83    0.07
   0 -10  -9    0.94    0.06
   0  10  -9    0.88    0.07
   0  10   9    0.65    0.07
   0  10  -9    0.86    0.07
   0  10  -9    0.76    0.07
   0  10   9    0.83    0.07
   1  10  -9    7.01    0.47
   1  10  -9    6.84    0.47
  -1  10   9    7.02    0.47
   1  10  -9    7.18    0.47
  -1  10   9    7.05    0.47
  -1 -10  -9    7.44    0.47
   1  10  -9    6.50    0.48
  -1  10  -9    7.05    0.47
   1  10   9    5.90    0.47
  -1  10  -9    7.00    0.47
  -1  10  -9    6.66    0.47
  -1  10  -9    7.40    0.47
   1 -10  -9    7.18    0.47
  -1  10  -9    6.85    0.47
   1  10   9    6.87    0.47
   2  10  -9    0.31    0.04
  -2 -10  -9    0.35    0.03
  -2 -10  -9    0.36    0.04
  -2  10   9    0.31    0.04
   2  10  -9    0.23    0.05
   2  10  -9    0.32    0.04
  -2  10   9    0.33    0.05
  -2  10  -9    0.30    0.03
   2 -10  -9    0.26    0.04
  -2  10  -9    0.38    0.03
   2  10   9    0.31    0.04
  -2  10  -9    0.35    0.04
   2  10   9    0.26    0.04
   2  10   9    0.35    0.05
  -2  10  -9    0.37    0.04
  -2  10  -9    0.31    0.04
   3  10  -9    0.85    0.09
  -3 -10  -9    1.04    0.07
  -3 -10  -9    0.93    0.07
  -3  10   9    0.99    0.10
   3  10  -9    0.89    0.08
  -3  10   9    0.87    0.08
   3  10  -9    0.84    0.07
  -3  10  -9    0.96    0.07
   3  10   9    0.85    0.08
  -3  10  -9    0.91    0.07
   3  10   9    0.80    0.07
  -3  10  -9    0.85    0.08
  -3  10  -9    0.75    0.12
  -3  10  -9    0.84    0.08
  -4 -10  -9    0.93    0.07
   4 -10   9    0.82    0.07
  -4 -10  -9    0.88    0.06
   4  10  -9    0.79    0.08
   4  10  -9    0.85    0.07
  -4  10   9    0.92    0.08
   4 -10  -9    0.92    0.09
  -4  10  -9    0.96    0.07
  -4  10  -9    1.01    0.07
  -4  10  -9    0.77    0.12
  -4  10  -9    0.89    0.07
  -4 -10   9    0.97    0.09
   4  10   9    0.71    0.07
   5  10  -9    3.37    0.26
  -5 -10  -9    4.20    0.25
   5 -10   9    3.71    0.25
  -5  10   9    3.84    0.25
  -5 -10  -9    3.83    0.25
   5  10  -9    3.59    0.25
   5 -10   9    3.70    0.25
  -5  10   9    3.80    0.25
   5 -10  -9    3.72    0.26
   5  10   9    3.23    0.25
  -5 -10   9    3.70    0.26
  -5  10  -9    3.68    0.25
  -5  10  -9    3.46    0.25
  -6  10   9    1.50    0.10
  -6 -10  -9    1.55    0.10
  -6 -10  -9    1.44    0.10
   6  10  -9    1.34    0.10
   6 -10  -9    1.37    0.11
   0  11   9    0.00    0.02
   0  11  -9    0.05    0.02
   0  11   9    0.09    0.04
   0  11  -9    0.01    0.02
   0 -11  -9    0.01    0.02
   0  11  -9    0.02    0.02
   0  11  -9    0.02    0.02
  -1  11   9    2.86    0.19
  -1  11   9    2.72    0.20
   1  11  -9    2.65    0.19
   1  11  -9    2.63    0.19
   1  11  -9    2.64    0.20
   1  11  -9    2.68    0.19
  -1 -11  -9    2.95    0.19
   1  11   9    2.60    0.19
  -1  11  -9    2.70    0.19
  -1  11  -9    2.72    0.19
  -1  11  -9    2.60    0.19
  -1  11  -9    2.62    0.19
   1 -11  -9    2.78    0.19
   2  11  -9    0.36    0.06
  -2  11   9    0.39    0.05
   2  11  -9    0.33    0.04
   2  11  -9    0.41    0.05
  -2  11   9    0.38    0.06
  -2 -11  -9    0.40    0.04
   2 -11  -9    0.43    0.04
  -2  11  -9    0.32    0.05
  -2  11  -9    0.39    0.04
  -2  11  -9    0.37    0.05
  -2  11  -9    0.42    0.04
   2  11   9    0.40    0.05
  -3  11   9    4.94    0.34
   3  11  -9    4.83    0.36
  -3 -11  -9    5.64    0.34
  -3  11   9    5.25    0.34
  -3 -11  -9    5.11    0.34
   3  11  -9    4.74    0.34
   3  11  -9    4.59    0.34
  -3  11  -9    5.18    0.34
  -3  11  -9    5.27    0.34
  -3  11  -9    4.81    0.34
  -3  11  -9    4.75    0.34
  -3  11  -9    4.81    0.34
   3  11   9    4.61    0.34
  -4  11   9    2.70    0.19
   4  11  -9    2.50    0.18
   4 -11   9    2.53    0.18
   4  11  -9    2.38    0.19
  -4 -11  -9    2.88    0.18
  -4  11   9    2.55    0.19
  -4 -11  -9    2.75    0.18
   4 -11  -9    2.51    0.19
  -4  11  -9    2.62    0.18
  -4  11  -9    2.57    0.18
  -4  11  -9    3.02    0.18
  -4  11  -9    2.50    0.18
   5 -11   9    2.39    0.17
  -5  11   9    2.73    0.18
  -5 -11  -9    2.62    0.17
   5  11  -9    2.47    0.17
  -5 -11  -9    2.73    0.17
  -5  11   9    2.68    0.18
   5 -11   9    2.63    0.17
   5  11  -9    2.38    0.18
   5 -11  -9    2.48    0.18
  -5  11  -9    2.36    0.18
  -5 -11   9    2.43    0.18
  -5  11  -9    2.32    0.17
   0  12  -9    0.32    0.04
   0  12  -9    0.26    0.03
   0  12  -9    0.31    0.05
   0  12   9    0.32    0.05
   0 -12  -9    0.33    0.04
   0  12  -9    0.26    0.04
   1  12  -9    2.76    0.21
  -1  12   9    3.18    0.21
   1  12  -9    2.84    0.21
   1  12  -9    2.90    0.21
  -1  12   9    3.13    0.22
  -1  12   9    3.17    0.22
  -1  12  -9    2.82    0.21
   1  12   9    3.05    0.21
  -1  12  -9    2.93    0.20
  -1  12  -9    2.98    0.21
   1 -12  -9    2.86    0.21
  -1  12  -9    3.01    0.21
  -2  12   9    1.03    0.08
  -2  12   9    0.94    0.08
   2  12  -9    0.94    0.08
  -2 -12  -9    0.98    0.07
   2  12  -9    0.93    0.08
  -2  12   9    0.98    0.08
  -2  12  -9    1.05    0.10
   2 -12  -9    0.84    0.07
  -2  12  -9    0.87    0.07
  -2  12  -9    0.88    0.08
   2  12   9    0.89    0.08
   3  12  -9    4.33    0.31
   3  12  -9    4.47    0.31
   3  12  -9    4.14    0.32
  -3  12   9    4.66    0.31
  -3  12   9    4.60    0.31
  -3 -12  -9    4.79    0.31
  -3  12   9    4.84    0.31
   3  12   9    4.52    0.31
  -3  12  -9    4.42    0.31
  -3  12  -9    4.34    0.31
  -3  12  -9    4.59    0.31
  -3  12  -9    4.54    0.31
   4  12  -9    0.95    0.07
  -4 -12  -9    0.98    0.07
  -4  12   9    0.96    0.08
   4  12  -9    0.88    0.08
  -4  12   9    1.04    0.08
  -4  12  -9    0.91    0.07
  -4  12  -9    0.96    0.07
  -4  12  -9    0.93    0.08
   4 -12  -9    1.00    0.08
   5 -12   9    1.12    0.08
  -5 -12  -9    1.09    0.07
  -5  12   9    1.18    0.08
   5  12  -9    0.92    0.09
   5  12  -9    1.05    0.08
  -5  12   9    1.17    0.08
   5 -12  -9    1.04    0.08
  -5  12  -9    1.02    0.10
   0  13  -9    0.77    0.06
   0  13   9    0.88    0.09
   0  13  -9    0.82    0.06
   0 -13  -9    0.81    0.06
   0  13   9    0.79    0.07
   0  13  -9    0.77    0.06
   0  13  -9    0.68    0.07
  -1  13   9    2.78    0.19
   1  13  -9    2.58    0.19
  -1  13   9    2.98    0.19
   1  13  -9    2.63    0.19
   1  13  -9    2.49    0.19
  -1 -13  -9    2.75    0.18
   1  13  -9    2.68    0.19
  -1  13  -9    2.53    0.18
   1 -13  -9    2.60    0.18
  -1  13  -9    2.74    0.19
  -1  13  -9    2.54    0.19
   1  13   9    2.68    0.19
  -1  13  -9    2.72    0.19
  -2  13   9    2.33    0.16
   2  13  -9    2.11    0.15
   2  13  -9    2.07    0.16
  -2  13   9    2.34    0.16
   2  13  -9    2.07    0.15
  -2  13   9    2.47    0.16
  -2 -13  -9    2.19    0.15
  -2  13  -9    2.13    0.15
  -2  13  -9    2.19    0.15
  -2  13  -9    2.09    0.16
   2  13   9    2.18    0.16
  -2  13  -9    1.97    0.15
  -3  13   9    0.85    0.06
   3  13  -9    0.71    0.07
   3  13  -9    0.75    0.06
  -3  13   9    0.79    0.07
  -3 -13  -9    0.83    0.06
  -3  13   9    0.89    0.07
   3  13  -9    0.71    0.07
  -3  13  -9    0.76    0.06
   3  13   9    0.82    0.07
  -3  13  -9    0.76    0.06
  -3  13  -9    0.73    0.06
  -3  13  -9    0.69    0.06
  -4  13   9    8.65    0.54
  -4 -13  -9    7.85    0.53
   4  13  -9    7.84    0.54
   4 -13   9    8.18    0.54
   4  13  -9    7.35    0.54
  -4  13   9    8.75    0.54
  -4  13  -9    7.09    0.54
   4 -13  -9    7.96    0.54
  -4  13  -9    8.13    0.54
   0  14  -9    3.66    0.25
   0 -14  -9    3.53    0.24
   0  14  -9    3.51    0.24
   0  14  -9    3.49    0.24
   0  14   9    3.82    0.25
   0  14  -9    3.39    0.25
   1  14  -9    1.52    0.11
  -1  14   9    1.89    0.12
  -1 -14  -9    1.57    0.11
   1  14  -9    1.59    0.11
  -1  14   9    1.79    0.12
   1  14  -9    1.52    0.12
   1  14  -9    1.48    0.12
  -1  14  -9    1.57    0.11
  -1  14  -9    1.61    0.11
  -1  14  -9    1.48    0.12
   1  14   9    1.65    0.12
  -1  14  -9    1.60    0.11
   1 -14  -9    1.55    0.11
   2  14  -9    1.23    0.10
   2  14  -9    1.29    0.10
  -2  14   9    1.51    0.10
  -2  14   9    1.48    0.10
  -2 -14  -9    1.27    0.09
   2  14  -9    1.30    0.09
  -2  14  -9    1.23    0.10
  -2  14  -9    1.36    0.10
   2  14   9    1.41    0.10
  -2  14  -9    1.19    0.09
  -2  14  -9    1.37    0.10
  -3 -14  -9    1.30    0.10
   3  14  -9    1.28    0.11
  -3  14   9    1.50    0.11
   3 -14   9    1.37    0.10
  -3  14   9    1.51    0.10
   3  14  -9    1.35    0.10
  -3  14   9    1.62    0.10
   3 -14  -9    1.47    0.11
  -3  14  -9    1.21    0.10
  -3  14  -9    1.49    0.10
  -3  14  -9    1.42    0.10
  -3  14  -9    1.37    0.10
   4 -14   9    0.68    0.05
   4  14  -9    0.63    0.05
  -4  14   9    0.72    0.05
   4 -14  -9    0.71    0.06
  -4  14  -9    0.59    0.06
   0  15  -9    0.26    0.03
   0  15  -9    0.28    0.03
   0  15   9    0.28    0.03
   0  15  -9    0.21    0.03
   0  15  -9    0.22    0.03
   0 -15  -9    0.22    0.03
  -1  15   9    2.70    0.17
  -1 -15  -9    2.24    0.16
   1  15  -9    2.42    0.16
  -1  15   9    2.51    0.17
   1  15  -9    2.23    0.16
   1  15  -9    2.19    0.17
   1  15   9    2.56    0.17
  -1  15  -9    2.24    0.16
  -1  15  -9    2.44    0.16
  -1  15  -9    2.44    0.16
  -1  15  -9    2.25    0.17
  -2 -15  -9    0.79    0.06
   2  15  -9    0.81    0.06
   2  15  -9    0.71    0.07
  -2  15   9    0.83    0.07
   2 -15   9    0.93    0.07
   2  15  -9    0.74    0.06
  -2  15   9    0.87    0.08
  -2  15  -9    0.87    0.06
  -2  15  -9    0.76    0.06
   2  15   9    0.89    0.07
  -2  15  -9    0.87    0.06
  -2  15  -9    0.78    0.07
   3  15  -9    1.57    0.13
  -3  15   9    1.99    0.12
   3  15  -9    1.74    0.12
   3 -15   9    1.85    0.12
  -3  15  -9    1.67    0.13
   3 -15  -9    1.77    0.13
  -3  15  -9    1.81    0.12
   0  16  -9    0.38    0.03
   0  16  -9    0.33    0.04
   0  16  -9    0.38    0.04
   0  16   9    0.38    0.04
   1  16  -9    0.50    0.04
   1  16  -9    0.48    0.04
  -1  16   9    0.52    0.04
   1  16  -9    0.47    0.05
  -1  16  -9    0.52    0.04
  -1  16  -9    0.50    0.04
  -1  16  -9    0.44    0.05
   1  16   9    0.46    0.04
  -2  16  -9    3.97    0.26
  -2  16  -9    3.60    0.26
  -2  16  -9    3.84    0.26
   0   0  10    5.50    0.39
   0   0 -10    6.54    0.40
   0   0 -10    5.27    0.39
   0   0 -10    6.21    0.39
   0   0 -10    5.41    0.39
   1   0 -10    3.84    0.27
   1   0  10    3.67    0.27
  -1   0 -10    4.36    0.27
  -1   0  10    4.04    0.29
  -1   0 -10    3.60    0.28
   1   0 -10    4.13    0.28
  -1   0 -10    3.85    0.27
   1   0 -10    3.99    0.27
   1   0  10    4.09    0.28
  -2   0 -10    0.26    0.03
  -2   0  10    0.21    0.07
  -2   0 -10    0.18    0.02
   2   0  10    0.25    0.04
  -2   0  10    0.18    0.03
   2   0  10    0.18    0.03
   2   0 -10    0.17    0.03
   2   0 -10    0.17    0.05
   2   0 -10    0.18    0.03
  -3   0 -10    1.62    0.11
   3   0  10    1.36    0.11
   3   0 -10    1.43    0.13
   3   0 -10    1.32    0.11
   3   0  10    1.48    0.11
  -3   0  10    1.58    0.11
  -3   0 -10    1.55    0.10
  -3   0  10    1.56    0.12
   3   0 -10    1.38    0.12
  -4   0 -10    0.34    0.03
  -4   0  10    0.28    0.04
   4   0 -10    0.23    0.05
   4   0 -10    0.24    0.04
   4   0  10    0.40    0.06
   4   0  10    0.27    0.04
  -4   0 -10    0.30    0.03
  -4   0  10    0.30    0.04
  -5   0 -10    2.63    0.17
  -5   0  10    2.61    0.19
   5   0 -10    2.18    0.19
   5   0  10    2.60    0.18
  -5   0 -10    2.76    0.18
  -5   0  10    2.61    0.18
  -6   0  10    2.06    0.14
   6   0  10    2.14    0.14
  -6   0 -10    2.23    0.14
   6   0 -10    1.84    0.15
  -6   0  10    1.80    0.23
   7   0 -10    2.90    0.20
  -7   0  10    2.65    0.26
   7   0  10    3.18    0.20
   0  -1  10    1.58    0.12
   0  -1 -10    1.86    0.13
   0   1  10    2.00    0.14
   0   1 -10    1.89    0.13
   0   1 -10    1.77    0.13
   0   1  10    1.63    0.12
   0   1 -10    1.60    0.13
   0  -1 -10    1.83    0.13
   0  -1 -10    1.66    0.12
  -1   1  10    5.14    0.35
   1   1 -10    4.80    0.34
   1   1 -10    5.25    0.38
   1   1 -10    5.08    0.34
  -1  -1 -10    5.52    0.34
  -1   1  10    4.86    0.34
   1  -1  10    5.17    0.35
  -1  -1 -10    5.15    0.34
   1   1 -10    5.53    0.35
   1  -1  10    4.67    0.34
   1   1  10    5.30    0.34
   1  -1 -10    5.18    0.35
  -1   1 -10    4.65    0.35
   1   1  10    4.73    0.34
  -1   1 -10    4.62    0.34
  -1   1 -10    5.28    0.34
   1  -1 -10    4.47    0.34
   1  -1 -10    5.23    0.34
  -1  -1  10    5.01    0.34
  -2  -1 -10    2.93    0.19
   2  -1  10    2.66    0.19
  -2   1  10    2.58    0.21
   2   1 -10    2.70    0.20
   2  -1  10    2.63    0.19
  -2   1  10    2.84    0.19
  -2   1  10    2.71    0.20
  -2  -1 -10    3.19    0.19
   2   1 -10    2.48    0.21
   2   1 -10    2.74    0.20
   2   1 -10    2.84    0.20
   2  -1 -10    2.64    0.21
   2  -1 -10    2.70    0.20
   2   1  10    2.69    0.19
  -2  -1  10    2.82    0.19
  -2   1 -10    3.18    0.19
   2   1  10    2.88    0.20
   2  -1 -10    2.79    0.20
  -2   1 -10    2.79    0.19
  -3   1  10   14.43    0.94
  -3  -1 -10   14.56    0.94
   3   1 -10   13.10    0.94
   3   1 -10   13.16    0.95
   3  -1  10   13.88    0.94
   3   1 -10   12.98    0.95
   3  -1  10   13.70    0.94
  -3   1  10   14.09    0.94
  -3  -1 -10   15.50    0.94
   3   1  10   14.34    0.94
   3   1  10   13.22    0.94
  -3   1 -10   15.96    0.94
   3  -1 -10   13.51    0.95
  -3  -1  10   14.89    0.95
  -3   1 -10   14.51    0.94
   3  -1 -10   12.57    0.94
   3  -1 -10   12.65    0.95
  -3  -1  10   14.83    0.94
   4   1 -10   10.17    0.78
  -4   1  10   11.52    0.77
  -4  -1 -10   12.28    0.77
   4  -1  10   11.85    0.77
   4   1 -10   10.98    0.78
   4   1 -10   10.98    0.78
   4  -1  10   11.57    0.78
  -4   1  10   11.98    0.78
  -4   1 -10   13.11    0.77
   4  -1 -10   10.56    0.78
   4   1  10   11.89    0.78
  -4  -1  10   12.24    0.78
  -4   1 -10   12.04    0.77
   4  -1 -10   10.73    0.78
   4  -1 -10   10.36    0.78
  -5  -1 -10    0.74    0.05
  -5   1  10    0.61    0.08
  -5  -1 -10    0.79    0.06
  -5   1  10    0.73    0.06
  -5   1  10    0.56    0.17
   5   1 -10    0.72    0.08
   5  -1  10    0.74    0.06
  -5  -1  10    0.79    0.06
   5   1  10    0.74    0.06
   5  -1 -10    0.65    0.08
  -5   1 -10    0.81    0.06
  -5  -1  10    0.79    0.09
   5  -1 -10    0.64    0.08
   6  -1  10    5.20    0.34
   6   1 -10    4.92    0.34
  -6   1  10    4.52    0.42
  -6  -1 -10    5.47    0.34
  -6   1  10    4.98    0.33
  -6   1  10    5.12    0.35
  -6  -1 -10    4.92    0.33
   6  -1 -10    4.44    0.34
  -6  -1  10    4.50    0.42
  -6   1 -10    5.24    0.33
   6   1  10    5.37    0.34
   6  -1 -10    4.53    0.34
  -6  -1  10    4.97    0.34
  -7  -1 -10    0.41    0.05
  -7   1  10    0.39    0.11
   7  -1  10    0.48    0.04
   7   1  10    0.52    0.05
  -7   1 -10    0.49    0.06
   7  -1 -10    0.38    0.05
  -7  -1  10    0.41    0.12
   0  -2 -10    2.40    0.16
   0  -2  10    2.21    0.16
   0   2  10    2.66    0.17
   0   2  10    2.02    0.16
   0  -2 -10    2.33    0.17
   0   2 -10    2.57    0.16
   0   2 -10    2.21    0.17
   0  -2 -10    2.16    0.16
   0   2 -10    2.39    0.16
   0   2  10    2.25    0.17
   1   2 -10   15.16    1.02
   1   2 -10   12.75    1.02
  -1   2  10   14.42    1.01
  -1  -2 -10   16.90    1.01
  -1   2  10   14.37    1.02
   1   2 -10   14.94    1.02
  -1  -2 -10   15.34    1.01
  -1   2  10   15.91    1.02
   1  -2  10   13.76    1.01
   1   2 -10   16.11    1.02
  -1  -2 -10   16.79    1.02
   1   2 -10   15.35    1.02
   1  -2 -10   13.90    1.01
   1  -2 -10   15.53    1.02
  -1  -2  10   14.91    1.01
   1  -2 -10   15.86    1.02
  -1   2 -10   15.91    1.01
  -1   2 -10   14.12    1.02
   1   2  10   16.58    1.02
   1   2  10   13.66    1.01
  -2  -2 -10   11.05    0.71
  -2  -2 -10   11.77    0.71
  -2   2  10   10.03    0.72
   2   2 -10    9.59    0.72
  -2   2  10   10.16    0.71
   2   2 -10   10.84    0.71
   2  -2  10   10.11    0.71
   2   2 -10   10.55    0.71
   2  -2  10    9.76    0.71
  -2   2  10   10.27    0.71
   2   2 -10   10.30    0.71
   2   2  10    9.35    0.71
   2   2  10   11.40    0.71
  -2  -2  10   11.08    0.71
  -2   2 -10   11.52    0.71
   2  -2 -10   10.29    0.71
   2  -2 -10   10.63    0.72
   3  -2  10    0.04    0.02
  -3   2  10    0.01    0.02
  -3  -2 -10    0.06    0.01
   3  -2  10    0.05    0.02
   3   2 -10    0.06    0.03
   3   2 -10    0.01    0.03
   3   2 -10    0.00    0.03
  -3   2  10    0.05    0.03
   3  -2  10    0.12    0.04
   3   2 -10   -0.01    0.02
  -3   2 -10    0.09    0.02
  -3  -2  10    0.08    0.02
   3   2  10    0.12    0.02
  -3  -2  10    0.09    0.03
   3  -2 -10    0.04    0.03
   3  -2 -10    0.06    0.04
   4   2 -10    0.41    0.05
   4   2 -10    0.23    0.04
  -4   2  10    0.25    0.04
   4  -2  10    0.32    0.04
  -4   2  10    0.36    0.04
   4   2 -10    0.21    0.05
   4   2 -10    0.25    0.04
  -4  -2 -10    0.36    0.03
   4  -2  10    0.29    0.04
   4  -2 -10    0.30    0.05
   4  -2 -10    0.33    0.05
  -4  -2  10    0.39    0.06
  -4   2 -10    0.28    0.14
   4  -2 -10    0.22    0.04
   4   2  10    0.25    0.04
  -4   2 -10    0.32    0.04
  -4  -2  10    0.32    0.04
   5   2 -10    2.50    0.20
  -5   2  10    2.76    0.19
   5  -2  10    2.68    0.19
  -5  -2 -10    2.77    0.18
   5   2 -10    2.46    0.19
  -5   2  10    2.60    0.18
  -5   2  10    2.32    0.28
  -5  -2  10    2.54    0.20
   5  -2 -10    2.46    0.19
  -5   2 -10    2.92    0.18
   5   2  10    2.75    0.18
  -5  -2  10    2.77    0.18
   5  -2 -10    2.36    0.20
   6  -2  10    0.03    0.02
  -6   2  10    0.04    0.08
  -6  -2 -10    0.06    0.02
  -6  -2 -10    0.06    0.01
   6   2 -10    0.03    0.02
  -6   2  10    0.05    0.04
   6  -2  10    0.08    0.03
  -6   2 -10    0.07    0.02
   6   2  10    0.04    0.02
   6  -2 -10    0.09    0.03
  -6  -2  10    0.02    0.02
   6  -2 -10    0.02    0.03
   6   2  10    0.13    0.03
  -6  -2  10    0.04    0.08
  -7   2  10    0.31    0.14
   7   2 -10    0.35    0.04
   7  -2  10    0.41    0.04
  -7  -2 -10    0.39    0.04
   7  -2 -10    0.37    0.06
  -7  -2  10    0.29    0.04
   7   2  10    0.42    0.04
   0   3 -10    1.04    0.07
   0  -3 -10    0.91    0.07
   0   3 -10    0.79    0.07
   0   3  10    1.00    0.08
   0  -3  10    0.86    0.07
   0   3 -10    0.84    0.07
   0   3 -10    0.95    0.07
   0   3  10    0.94    0.09
   0   3 -10    0.76    0.07
   0  -3 -10    0.76    0.09
   0  -3 -10    0.91    0.06
   0   3  10    0.81    0.07
   0   3 -10    0.77    0.09
   0   3  10    0.74    0.07
  -1   3  10    5.47    0.37
  -1   3  10    4.91    0.36
  -1  -3 -10    6.04    0.36
   1   3 -10    5.04    0.36
   1   3 -10    5.73    0.36
   1   3 -10    5.18    0.36
  -1   3  10    4.92    0.36
  -1  -3 -10    5.54    0.36
   1   3 -10    4.68    0.37
  -1  -3 -10    5.65    0.37
   1   3 -10    5.70    0.36
   1   3  10    5.80    0.36
   1  -3 -10    5.49    0.36
  -1   3 -10    5.00    0.36
   1  -3 -10    5.02    0.36
   1  -3 -10    5.30    0.37
  -1  -3  10    5.32    0.36
  -1   3 -10    5.18    0.36
  -1   3 -10    5.50    0.36
   1   3  10    4.63    0.36
   2   3 -10    5.59    0.41
  -2  -3 -10    6.28    0.40
  -2   3  10    5.82    0.41
   2   3 -10    5.92    0.40
   2   3 -10    6.33    0.40
  -2  -3 -10    6.06    0.40
   2  -3  10    5.51    0.40
  -2   3  10    5.70    0.40
  -2   3  10    5.69    0.40
   2   3 -10    5.69    0.41
   2  -3  10    5.22    0.40
   2   3 -10    5.86    0.40
  -2   3 -10    6.01    0.40
  -2  -3  10    6.49    0.40
   2  -3 -10    6.01    0.40
   2  -3 -10    5.42    0.40
  -2   3 -10    6.39    0.40
  -2   3 -10    5.49    0.40
   2   3  10    6.46    0.40
   2  -3 -10    5.90    0.41
   3   3 -10    2.24    0.16
   3   3 -10    2.04    0.16
  -3  -3 -10    2.33    0.15
   3   3 -10    2.00    0.16
   3  -3  10    2.01    0.15
   3   3 -10    2.03    0.17
   3  -3  10    2.09    0.15
   3   3 -10    2.20    0.16
  -3   3  10    2.10    0.15
  -3   3  10    2.22    0.16
  -3   3 -10    2.41    0.15
   3  -3 -10    2.05    0.17
  -3  -3  10    2.34    0.15
   3   3  10    2.34    0.16
  -3   3 -10    2.09    0.22
   3  -3 -10    2.05    0.16
   4   3 -10    0.30    0.05
  -4  -3 -10    0.29    0.03
   4  -3  10    0.29    0.04
   4  -3  10    0.30    0.03
   4   3 -10    0.34    0.05
  -4   3  10    0.34    0.04
   4   3 -10    0.30    0.04
   4   3 -10    0.31    0.06
  -4   3  10    0.23    0.04
   4  -3 -10    0.20    0.04
  -4  -3  10    0.30    0.04
  -4   3 -10    0.34    0.04
   4  -3 -10    0.27    0.05
   4  -3 -10    0.29    0.05
  -4   3 -10    0.27    0.12
  -4  -3  10    0.32    0.05
   4   3  10    0.29    0.04
   5   3 -10    1.78    0.13
   5  -3  10    1.69    0.12
  -5  -3 -10    1.79    0.12
   5   3 -10    1.71    0.13
  -5   3  10    1.53    0.22
   5   3 -10    1.60    0.14
  -5   3  10    1.74    0.13
  -5  -3  10    1.63    0.16
   5   3  10    1.86    0.12
   5  -3 -10    1.63    0.14
  -5   3 -10    1.55    0.27
   5  -3 -10    1.62    0.14
  -6   3  10    3.94    0.26
  -6  -3 -10    4.10    0.26
   6  -3  10    3.99    0.26
  -6   3  10    3.36    0.33
   6   3 -10    3.76    0.26
  -6  -3 -10    3.82    0.25
  -6  -3  10    3.79    0.26
   6  -3 -10    3.44    0.26
   6   3  10    4.14    0.26
  -6  -3  10    3.43    0.34
   6  -3 -10    3.59    0.26
  -7  -3 -10    2.24    0.14
   7  -3  10    2.27    0.15
  -7   3  10    1.98    0.20
   7   3  10    2.22    0.15
  -7  -3  10    2.10    0.14
  -7  -3  10    1.83    0.20
   7  -3 -10    2.08    0.15
   0   4  10   33.91    2.07
   0   4 -10   26.74    2.07
   0   4 -10   35.04    2.07
   0   4 -10   28.64    2.07
   0  -4 -10   33.73    2.07
   0  -4 -10   30.57    2.07
   0   4  10   33.55    2.07
   0   4 -10   34.52    2.07
   0  -4 -10   30.03    2.08
   0   4 -10   29.79    2.07
   0   4  10   27.91    2.07
   0  -4  10   28.74    2.07
   0   4 -10   28.85    2.07
   1   4 -10    2.31    0.15
  -1  -4 -10    2.21    0.15
   1   4 -10    2.19    0.15
   1   4 -10    1.98    0.15
  -1   4  10    1.96    0.15
   1  -4  10    1.99    0.15
   1   4 -10    1.94    0.16
  -1   4  10    1.80    0.15
   1   4 -10    2.54    0.15
  -1   4  10    2.25    0.16
  -1  -4  10    2.13    0.15
  -1   4 -10    2.20    0.15
  -1   4 -10    2.08    0.16
   1  -4 -10    2.04    0.15
  -1   4 -10    2.07    0.15
   1  -4 -10    2.27    0.15
   1  -4 -10    1.99    0.17
  -1   4 -10    2.01    0.15
   1   4  10    2.32    0.15
   2   4 -10    0.44    0.05
   2   4 -10    0.50    0.05
   2  -4  10    0.48    0.06
  -2   4  10    0.51    0.05
  -2  -4 -10    0.53    0.04
   2   4 -10    0.42    0.05
  -2   4  10    0.46    0.05
  -2  -4 -10    0.50    0.04
   2  -4 -10    0.40    0.07
  -2  -4  10    0.49    0.05
  -2   4 -10    0.40    0.06
   2   4  10    0.53    0.05
   2  -4 -10    0.44    0.08
  -2   4 -10    0.54    0.05
  -2   4 -10    0.44    0.05
   2  -4 -10    0.54    0.04
   3   4 -10    0.65    0.06
   3   4 -10    0.71    0.06
   3   4 -10    0.64    0.07
  -3   4  10    0.68    0.07
  -3  -4 -10    0.68    0.05
  -3   4  10    0.60    0.06
   3   4 -10    0.63    0.07
   3  -4  10    0.62    0.06
   3   4 -10    0.54    0.06
   3  -4 -10    0.62    0.08
   3  -4 -10    0.69    0.08
  -3   4 -10    0.60    0.06
  -3  -4  10    0.70    0.06
  -3   4 -10    0.66    0.06
  -3   4 -10    0.66    0.12
   3   4  10    0.67    0.06
   4  -4  10    8.71    0.61
  -4   4  10    8.33    0.61
  -4  -4 -10    9.78    0.61
   4   4 -10    8.56    0.62
   4   4 -10    9.74    0.62
  -4   4  10    9.26    0.62
  -4   4  10    7.77    0.70
   4   4 -10    8.92    0.62
   4  -4  10    9.21    0.61
   4   4 -10    8.69    0.62
  -4   4 -10    9.57    0.61
   4  -4 -10    8.86    0.63
   4   4  10    9.65    0.61
   4  -4 -10    8.75    0.62
  -4  -4  10    9.80    0.61
  -4  -4  10    9.49    0.62
  -4   4 -10    9.04    0.67
  -5   4  10    3.26    0.22
   5   4 -10    2.90    0.21
   5  -4  10    3.01    0.21
   5   4 -10    2.81    0.22
  -5   4  10    2.50    0.40
   5   4 -10    3.23    0.21
  -5  -4 -10    3.10    0.21
  -5  -4  10    3.20    0.21
  -5   4 -10    3.01    0.27
   5   4  10    3.22    0.21
  -6  -4 -10    0.08    0.02
   6  -4  10    0.08    0.02
  -6   4  10    0.03    0.03
   6   4 -10    0.12    0.02
  -6  -4 -10    0.10    0.01
  -6   4  10    0.10    0.08
   6   4  10    0.08    0.02
   6  -4 -10    0.08    0.03
  -6  -4  10    0.10    0.08
  -6  -4  10    0.05    0.02
   6  -4 -10    0.06    0.03
   7  -4  10    1.28    0.09
  -7  -4 -10    1.31    0.09
  -7   4  10    1.11    0.14
  -7  -4  10    1.18    0.16
  -7  -4  10    1.23    0.09
   7  -4 -10    1.25    0.10
   7   4  10    1.29    0.09
   7   4  10    1.36    0.09
   0  -5  10    6.70    0.50
   0   5 -10    6.75    0.50
   0   5  10    7.69    0.50
   0   5 -10    8.34    0.50
   0   5  10    7.79    0.50
   0  -5 -10    7.54    0.49
   0   5 -10    6.45    0.50
   0   5  10    6.55    0.50
   0   5 -10    8.18    0.50
   0  -5 -10    8.26    0.50
   0   5 -10    6.90    0.50
   0   5 -10    7.02    0.50
   1   5 -10   10.10    0.69
  -1  -5 -10   10.56    0.69
   1   5 -10   10.39    0.69
  -1   5  10   10.01    0.69
  -1   5  10    9.30    0.69
   1   5 -10   11.56    0.69
   1   5 -10    9.52    0.69
   1   5 -10    9.47    0.69
   1  -5 -10   11.11    0.69
  -1   5 -10    9.63    0.69
  -1   5 -10    9.92    0.69
   1  -5 -10   10.11    0.71
  -1  -5  10   10.47    0.69
  -1   5 -10    9.75    0.69
   1   5  10   11.14    0.69
   2   5 -10    8.20    0.60
   2   5 -10    8.80    0.60
  -2   5  10    8.75    0.61
   2   5 -10    9.71    0.60
  -2   5  10    8.37    0.60
   2   5 -10    8.17    0.61
  -2  -5 -10    9.60    0.60
   2   5 -10    9.23    0.61
  -2  -5 -10   10.14    0.60
   2  -5  10    8.19    0.60
  -2   5 -10    8.64    0.61
  -2   5 -10    8.91    0.60
  -2  -5  10    9.48    0.61
   2   5  10    9.82    0.60
   2  -5 -10    8.62    0.61
  -2   5 -10    8.61    0.65
   2  -5 -10    8.75    0.61
   2  -5 -10    8.55    0.60
   3   5 -10    2.37    0.17
   3   5 -10    2.21    0.17
   3   5 -10    2.47    0.17
  -3  -5 -10    2.60    0.16
   3   5 -10    2.26    0.18
  -3   5  10    2.03    0.28
  -3   5  10    2.39    0.17
   3  -5  10    2.28    0.17
   3   5 -10    2.50    0.17
   3   5  10    2.63    0.17
  -3   5 -10    2.26    0.17
  -3  -5  10    2.55    0.17
  -3   5 -10    2.46    0.17
  -3   5 -10    2.43    0.23
  -3   5 -10    2.40    0.17
  -4  -5 -10    6.13    0.40
   4   5 -10    5.59    0.41
   4  -5  10    5.89    0.40
   4   5 -10    6.06    0.40
   4   5 -10    5.76    0.40
  -4   5  10    5.19    0.48
   4  -5  10    5.83    0.40
  -4   5  10    6.03    0.40
   4   5 -10    5.58    0.40
  -4  -5  10    5.93    0.41
  -4   5 -10    5.86    0.45
  -4  -5  10    6.53    0.40
   4  -5 -10    5.71    0.41
   4  -5 -10    5.63    0.41
   4   5  10    6.24    0.40
   5   5 -10   11.57    0.79
  -5   5  10   10.83    0.87
   5   5 -10   12.29    0.79
   5  -5  10   10.30    0.80
   5  -5  10   12.57    0.79
  -5  -5 -10   12.09    0.79
  -5   5  10   11.60    0.81
  -5  -5  10   12.36    0.80
  -5   5 -10   11.88    0.84
   5  -5 -10   11.33    0.80
   5  -5 -10   11.57    0.80
   5   5  10   12.76    0.80
   6  -5  10    3.55    0.24
  -6   5  10    3.67    0.24
  -6  -5 -10    3.47    0.23
  -6   5  10    3.18    0.30
  -6  -5 -10    3.83    0.24
  -6  -5  10    3.53    0.24
   6  -5 -10    3.22    0.24
   6  -5 -10    3.42    0.24
   6   5  10    3.58    0.24
  -6  -5  10    3.06    0.31
   7  -5  10    0.06    0.02
   7  -5 -10    0.07    0.03
  -7  -5  10    0.09    0.02
   0  -6 -10    0.05    0.01
   0   6 -10    0.05    0.02
   0   6  10    0.01    0.02
   0   6 -10    0.07    0.02
   0   6  10    0.04    0.04
   0   6  10    0.05    0.04
   0  -6 -10    0.06    0.03
   0  -6  10    0.03    0.02
   0   6 -10    0.04    0.02
   0   6 -10    0.06    0.02
   0   6 -10    0.07    0.02
   1   6 -10   20.61    1.42
   1   6 -10   22.20    1.42
  -1  -6 -10   23.44    1.42
   1   6 -10   18.96    1.42
   1   6 -10   20.35    1.42
  -1   6  10   19.77    1.42
   1   6 -10   21.29    1.42
  -1   6  10   20.17    1.42
   1   6 -10   19.34    1.42
  -1  -6 -10   22.76    1.41
   1   6  10   23.11    1.42
   1  -6 -10   21.72    1.41
  -1   6 -10   19.87    1.42
   1   6  10   22.22    1.42
  -1   6 -10   20.98    1.42
   1  -6 -10   21.76    1.42
  -1   6 -10   19.88    1.42
  -1  -6  10   21.28    1.41
   2   6 -10    0.00    0.03
   2   6 -10    0.02    0.02
   2   6 -10    0.03    0.02
   2   6 -10    0.03    0.02
   2   6 -10    0.03    0.02
  -2   6  10    0.03    0.03
  -2   6  10    0.08    0.03
  -2  -6 -10    0.03    0.02
   2  -6  10    0.00    0.03
   2   6  10    0.02    0.02
  -2   6 -10    0.04    0.03
  -2   6 -10    0.04    0.03
  -2  -6  10   -0.02    0.03
  -2   6 -10    0.00    0.02
   2  -6 -10    0.03    0.02
  -2   6 -10    0.02    0.03
   2   6  10    0.02    0.02
   3   6 -10    1.93    0.15
   3   6 -10    2.10    0.15
   3   6 -10    2.27    0.16
  -3  -6 -10    2.21    0.15
  -3   6  10    2.15    0.16
   3   6 -10    1.99    0.16
   3   6 -10    2.11    0.15
   3  -6  10    2.03    0.15
   3   6  10    2.20    0.15
   3  -6 -10    2.00    0.17
  -3  -6  10    2.33    0.15
  -3   6 -10    2.03    0.16
  -3   6 -10    2.17    0.15
  -3   6 -10    2.10    0.21
  -4   6  10    4.36    0.29
  -4   6  10    3.88    0.38
   4  -6  10    4.19    0.29
   4   6 -10    4.32    0.29
   4   6 -10    3.87    0.29
   4   6 -10    4.04    0.30
  -4  -6 -10    4.59    0.29
   4   6 -10    4.06    0.29
  -4  -6  10    4.71    0.29
   4  -6 -10    3.91    0.30
  -4   6 -10    4.31    0.35
   4   6  10    4.36    0.29
  -4   6 -10    4.03    0.29
  -4  -6  10    4.23    0.30
   4  -6 -10    4.31    0.31
  -5  -6 -10    1.14    0.08
  -5   6  10    1.07    0.18
   5  -6  10    1.14    0.09
   5  -6  10    1.13    0.08
  -5   6  10    1.15    0.09
   5   6 -10    1.15    0.09
   5   6 -10    1.00    0.10
   5  -6 -10    1.05    0.10
  -5   6 -10    1.05    0.14
  -5  -6  10    1.16    0.09
   5  -6 -10    1.03    0.10
   5   6  10    1.08    0.08
   6  -6  10    1.24    0.09
  -6   6  10    1.13    0.16
   6   6 -10    1.21    0.09
  -6  -6 -10    1.35    0.09
  -6  -6 -10    1.22    0.08
  -6   6  10    1.24    0.10
   6  -6 -10    1.15    0.10
   6   6  10    1.20    0.09
  -6  -6  10    1.07    0.17
   6  -6 -10    1.30    0.10
  -6  -6  10    1.24    0.09
   0  -7  10    0.22    0.03
   0   7 -10    0.19    0.04
   0   7  10    0.26    0.04
   0   7  10    0.23    0.05
   0   7 -10    0.22    0.03
   0   7 -10    0.20    0.03
   0   7 -10    0.18    0.03
   0   7 -10    0.19    0.03
   0   7 -10    0.23    0.03
   0   7  10    0.25    0.04
   0  -7 -10    0.20    0.03
  -1  -7 -10   35.66    2.22
   1   7 -10   33.22    2.22
  -1   7  10   31.88    2.22
   1   7 -10   28.65    2.22
   1   7 -10   35.54    2.22
   1   7 -10   32.26    2.22
   1   7 -10   32.85    2.22
   1   7 -10   30.24    2.22
  -1   7  10   30.46    2.22
  -1   7 -10   33.25    2.22
  -1   7 -10   31.75    2.22
   1   7  10   35.09    2.22
  -1   7 -10   38.23    2.22
  -1   7 -10   28.95    2.22
  -1   7 -10   31.16    2.22
  -1   7 -10   38.00    2.22
  -1  -7  10   33.58    2.22
   1   7  10   34.61    2.22
   1  -7 -10   33.82    2.22
[truncated: 188,155 more chars]
